# Supplementary material for: Lipidomic atlas of mammalian cell membranes reveals hierarchical variation induced by culture conditions, subcellular membranes, and cell lineages
Source: Royal Society of Chemistry journal article supplement (doi:10.1039/d0sm00404a), 2020-05-13
Supplement: d0sm00404a1.xlsx [file d0sm00404a1.xlsx]

## Sheet: Compilation for Lipidomic Atlas
		Original Code	JC01	JC02	JC03	JC1_DMSO1CM_DMSO1CM	JC2_DMSO2CM_DMSO2CM	JC3_DMSO3CM_DMSO3CM	JC10_DMSO1GPMV_DMSO1GPMV	JC11_DMSO2GPMV_DMSO2GPMV	JC12_DMSO3GMPV_DMSO3GMPV	HCC1806-DMSO	HCC1806-DMSO	HCC1806-DMSO	HG001	HG003	HW001	HW003	J13_pWZLPM_pWZLGPMV1-1	J19_pWZLPM_pWZLGPMV2-2	J1_pWZLCM_pWZLCM1-1	J7_pWZLCM_pWZLCM2-2	Un-PM-Ctrl-1_Undiff-GPMV	Un-PM-Ctrl-2_Undiff-GPMV	Un-PM-Ctrl-3_Undiff-GPMV	Un-PM-Ctrl-4_Undiff-GPMV	Un-CM-Ctrl-1_Undiff-CM	Un-CM-Ctrl-2_Undiff-CM	Un-CM-Ctrl-3_Undiff-CM	Un-CM-Ctrl-4_Undiff-CM	JC13_PM-DMSO_GPMVsDMSO1	JC14_PM-DMSO_GMPVsDMSO2	JC1_CM-DMSO_P100DMSO1	JC2_CM-DMSO_P100DMSO2	WT-Control	WT-Control	WT-Control	PC-1_RBC-PLD_PCA	PI-1_RBC-PLC_PI-1	SP-1_RBC-SPMase_SPA	PC-1_RBC-PLD_PCA	RBCwoPLD	RBCwoPLD	RBCwoPLD	RBCwoSPM	RBCwoSPM	RBC1	RBC4	RBC8
		Contact	Jin Cho	Jin Cho	Jin Cho	Jin Cho	Jin Cho	Jin Cho	Jin Cho	Jin Cho	Jin Cho	Guangwei Du	Guangwei Du	Guangwei Du	Kandice/Barbara	Kandice/Barbara	Kandice/Barbara	Kandice/Barbara	Jeff Chang	Jeff Chang	Jeff Chang	Jeff Chang	Kandice Levental	Kandice Levental	Kandice Levental	Kandice Levental	Kandice Levental	Kandice Levental	Kandice Levental	Kandice Levental	Jin Cho	Jin Cho	Jin Cho	Jin Cho	Jin Cho	Jin Cho	Jin Cho	LG	LG	LG	LG	LG	LG	LG	LG	LG	Kandice Levental	Kandice Levental	Kandice Levental
		Lab	Hancock Lab	Hancock Lab	Hancock Lab	Hancock Lab	Hancock Lab	Hancock Lab	Hancock Lab	Hancock Lab	Hancock Lab	Du Lab	Du Lab	Du Lab	Levental Lab	Levental Lab	Levental Lab	Levental Lab	Hancock Lab	Hancock Lab	Hancock Lab	Hancock Lab	Levental Lab	Levental Lab	Levental Lab	Levental Lab	Levental Lab	Levental Lab	Levental Lab	Levental Lab	Hancock Lab	Hancock Lab	Hancock Lab	Hancock Lab	Hancock Lab	Hancock Lab	Hancock Lab	Levental Lab	Levental Lab	Levental Lab	Levental Lab	Levental Lab	Levental Lab	Levental Lab	Levental Lab	Levental Lab	Levental Lab	Levental Lab	Levental Lab
		Cell Type	CHO	CHO	CHO	CHO	CHO	CHO	CHO	CHO	CHO	HCC 1806	HCC 1806	HCC 1806	HEK	HEK	HEK	HEK	HMLE	HMLE	HMLE	HMLE	hMSC	hMSC	hMSC	hMSC	hMSC	hMSC	hMSC	hMSC	MDCK	MDCK	MDCK	MDCK	MDCK	MDCK	MDCK	RBC	RBC	RBC	RBC	RBC	RBC	RBC	RBC	RBC	RBC	RBC	RBC
		Lipidomic	WC	WC	WC	CM	CM	CM	GPMV	GPMV	GPMV	WC*	WC*	WC*	GPMV	GPMV	WC	WC	GPMV	GPMV	CM	CM	GPMV	GPMV	GPMV	GPMV	CM	CM	CM	CM	GPMV	GPMV	CM	CM	WC	WC	WC	PM	PM	PM	PM	PM	PM	PM	PM	PM	PM	PM	PM
		Contact Initials	JC	JC	JC	JC	JC	JC	JC	JC	JC	GD	GD	GD	BDR	BDR	BDR	BDR	JFC	JFC	JFC	JFC	KL	KL	KL	KL	KL	KL	KL	KL	JC	JC	JC	JC	JC	JC	JC	LG	LG	LG	LG	LG	LG	LG	LG	LG	KL	KL	KL
		Date	20160912 - 1	20160912 -2	20160912 - 3	20160114 - 1	20160114 - 2	20160114 - 3	20160114 - 1	20160114 - 2	20160114 - 3	1	2	3	20171019 - 1	20171019 - 2	20171019 - 1	20171019 - 2	20150204 - 1	20150204 - 2	20150204 - 1	20150204 - 2	20150724 - 1	20150724 - 2	20150724 - 3	20150724 - 4	20150724 - 1	20150724 - 2	20150724 - 3	20150724 - 4								(A)	(A)	(A)	(B)	(C)	(C)	(C)	(C)	(C)	(A)	(A)	(A)
		Code	CHO WC JC 20160912 - 1	CHO WC JC 20160912 -2	CHO WC JC 20160912 - 3	CHO CM JC 20160114 - 1	CHO CM JC 20160114 - 2	CHO CM JC 20160114 - 3	CHO GPMV JC 20160114 - 1	CHO GPMV JC 20160114 - 2	CHO GPMV JC 20160114 - 3	HCC 1806 WC* GD 1	HCC 1806 WC* GD 2	HCC 1806 WC* GD 3	HEK GPMV BDR 20171019 - 1	HEK GPMV BDR 20171019 - 2	HEK WC BDR 20171019 - 1	HEK WC BDR 20171019 - 2	HMLE GPMV JFC 20150204 - 1	HMLE GPMV JFC 20150204 - 2	HMLE CM JFC 20150204 - 1	HMLE CM JFC 20150204 - 2	hMSC GPMV KL 20150724 - 1	hMSC GPMV KL 20150724 - 2	hMSC GPMV KL 20150724 - 3	hMSC GPMV KL 20150724 - 4	hMSC CM KL 20150724 - 1	hMSC CM KL 20150724 - 2	hMSC CM KL 20150724 - 3	hMSC CM KL 20150724 - 4	MDCK GPMV JC	MDCK GPMV JC	MDCK CM JC	MDCK CM JC	MDCK WC JC	MDCK WC JC	MDCK WC JC	RBC PM LG (A) - 1	RBC PM LG (A) - 2	RBC PM LG (A) - 3	RBC PM LG (B) - 1	RBC PM LG (C) - 1	RBC PM LG (C) - 2	RBC PM LG (C) - 3	RBC PM LG (C) - 4	RBC PM LG (C) - 5	RBC PM KL (A) - 1	RBC PM KL (A) - 2	RBC PM KL (A) - 3
lipid unsaturation (as mol% non-sterol membrane lipids	mol% unsaturations of two-tailed PL (DB Corr)	0	8.47085	8.20692	8.3646	12.6443	12.558	12.4336	15.6034	15.4924	15.3553	10.3872	10.2376	10.6346	17.5949	20.1094	10.4748	9.22088	13.3861	14.3368	11.7176	11.1251	12.663	29.9549	15.9595	20.9095	11.2324	13.2394	14.2988	12.486	18.0968	14.6083	15.7005	15.4993	11.6487	11.5209	11.6302	12.5334	13.4171	12.0324	7.92707	15.621	15.8627	16.3866	14.6827	16.3011	13.8132	17.4533	15.1082
		1	38.5975	40.0426	40.1301	44.2193	44.7684	44.444	35.4414	35.238	34.9678	37.9353	37.7757	38.0872	44.5139	41.4934	38.3279	37.3744	43.8339	43.4443	43.1586	44.3923	38.5757	44.3349	49.5116	41.5696	37.6386	41.9569	42.1055	39.1945	37.4217	40.5059	42.9477	44.1539	34.1013	33.4163	33.3198	16.3489	18.3512	16.0912	15.4824	19.2891	19.191	19.472	18.8168	19.6525	19.6131	19.3426	19.2422
		2	35.9026	36.224	35.926	33.7409	33.6932	33.3109	33.8861	32.9821	33.9662	14.1584	13.6251	14.2267	20.3496	17.4303	18.0497	19.084	37.7778	36.7198	41.6877	41.9696	21.7099	14.1427	21.1947	17.9741	22.3576	22.9382	23.3763	24.0738	31.2082	29.8688	31.2302	30.6096	33.5843	34.1006	34.6115	22.0433	21.7315	21.5021	17.6967	16.4384	16.4538	16.9548	17.7118	17.4182	13.2723	21.2224	19.6576
		3	9.98843	9.15095	8.43998	3.79294	4.04031	4.13902	6.06363	6.19249	6.42812	6.84377	6.72807	6.28996	3.73633	5.61483	4.43725	8.68949	4.42071	4.72577	3.03972	2.20026	5.25143	2.40949	3.80496	3.82706	5.06045	4.72787	4.74478	4.38756	3.31288	3.82261	3.49456	3.32207	8.06486	8.44209	7.9233	3.34466	3.20587	3.65992	5.36102	5.09454	5.82658	5.58444	5.80748	6.02744	4.11333	6.30931	6.08905
		4	3.8199	3.51147	3.74211	3.159	2.80324	3.05336	5.25413	5.97596	5.82129	17.6358	18.3981	17.6788	6.95274	9.14939	12.6617	11.6973	0.581475	0.550594	0.250729	0.216557	9.7061	5.48282	5.43972	8.37584	11.0058	9.20299	8.31169	10.2117	4.15015	4.9362	4.04766	3.73141	5.96218	5.95199	5.88379	30.7567	29.004	30.3873	36.297	27.9839	27.6493	26.746	27.2037	25.5597	30.4523	23.8989	28.9679
		5	2.43896	1.86639	2.27199	1.60089	1.45475	1.69627	2.75059	2.96499	2.50594	8.13989	8.21206	8.07634	3.9274	4.43483	9.04282	7.5021	0	0.222648	0.145598	0.0961822	6.98152	2.80483	3.10614	5.51743	7.52696	5.52847	5.01666	6.75228	3.22016	3.70732	1.74969	1.78586	3.90988	3.72523	4.04675	8.73618	8.5454	8.8692	10.6024	9.61625	9.44509	9.19436	9.38003	9.01234	8.09959	8.01034	7.38459
		6	0.781773	0.812343	0.687152	0.218332	0.205854	0.21767	0.83526	0.956946	0.793915	3.9355	4.15999	4.08147	2.62699	1.5554	6.10653	5.08127	0	0	0	0	4.35811	0.870227	0.983401	1.82644	4.33819	2.13217	1.91851	2.32599	2.00084	2.0663	0.213267	0.122453	1.75455	2.04064	1.76871	5.13701	4.93027	5.20994	5.79805	4.91251	4.74708	4.84609	4.93176	4.73124	9.40302	2.99116	2.87241
		7	0	0.185294	0.43809	0.624243	0.476283	0.705246	0.1655	0.197052	0.161449	0.964224	0.863307	0.924953	0.298178	0.212426	0.899301	1.35055	0	0	0	0	0.75421	0	0	0	0.84009	0.273997	0.227828	0.568111	0.589206	0.484663	0.616447	0.775504	0.974215	0.802332	0.81597	1.09994	0.814618	2.24787	0.835402	1.04428	0.824502	0.815746	1.46579	1.29751	1.23319	0.771988	0.678086
		uns index	1.72533	1.69492	1.7082	1.494	1.47332	1.5042	1.62344	1.6563	1.63893	2.28388	2.30866	2.27471	1.61719	1.6279	2.26534	2.25852	1.34978	1.34377	1.37384	1.36279	2.0291	1.21026	1.46506	1.61048	2.11103	1.81182	1.74528	1.93046	1.58608	1.65783	1.46426	1.45357	1.86209	1.87238	1.86406	2.75699	2.65459	2.82965	3.05795	2.64251	2.61655	2.57877	2.67229	2.57342	2.85855	2.39714	2.516
lipid unsaturation (as mol% non-sterol membrane lipids)		0	8.47085	8.20692	8.3646	12.6443	12.558	12.4336	15.6034	15.4924	15.3553	10.3872	10.2376	10.6346	17.5949	20.1094	10.4748	9.22088	13.3861	14.3368	11.7176	11.1251	12.663	29.9549	15.9595	20.9095	11.2324	13.2394	14.2988	12.486	18.0968	14.6083	15.7005	15.4993	11.6487	11.5209	11.6302	12.5334	13.4171	12.0324	7.92707	15.621	15.8627	16.3866	14.6827	16.3011	13.8132	17.4533	15.1082
		1	38.5975	40.0426	40.1301	44.2193	44.7684	44.444	35.4414	35.238	34.9678	37.9353	37.7757	38.0872	44.5139	41.4934	38.3279	37.3744	43.8339	43.4443	43.1586	44.3923	38.5757	44.3349	49.5116	41.5696	37.6386	41.9569	42.1055	39.1945	37.4217	40.5059	42.9477	44.1539	34.1013	33.4163	33.3198	16.3489	18.3512	16.0912	15.4824	19.2891	19.191	19.472	18.8168	19.6525	19.6131	19.3426	19.2422
		2	35.9026	36.224	35.926	33.7409	33.6932	33.3109	33.8861	32.9821	33.9662	14.1584	13.6251	14.2267	20.3496	17.4303	18.0497	19.084	37.7778	36.7198	41.6877	41.9696	21.7099	14.1427	21.1947	17.9741	22.3576	22.9382	23.3763	24.0738	31.2082	29.8688	31.2302	30.6096	33.5843	34.1006	34.6115	22.0433	21.7315	21.5021	17.6967	16.4384	16.4538	16.9548	17.7118	17.4182	13.2723	21.2224	19.6576
		3	9.98843	9.15095	8.43998	3.79294	4.04031	4.13902	6.06363	6.19249	6.42812	6.84377	6.72807	6.28996	3.73633	5.61483	4.43725	8.68949	4.42071	4.72577	3.03972	2.20026	5.25143	2.40949	3.80496	3.82706	5.06045	4.72787	4.74478	4.38756	3.31288	3.82261	3.49456	3.32207	8.06486	8.44209	7.9233	3.34466	3.20587	3.65992	5.36102	5.09454	5.82658	5.58444	5.80748	6.02744	4.11333	6.30931	6.08905
		4	7.04064	6.3755	7.13934	5.60247	4.94013	5.67255	9.00549	10.0949	9.2826	30.6754	31.6334	30.7616	13.8053	15.352	28.7103	25.6313	0.581475	0.773242	0.396327	0.312739	21.7999	9.15788	9.52925	15.7197	23.711	17.1376	15.4747	19.8581	9.96036	11.1945	6.62706	6.41522	12.6008	12.5202	12.5152	45.7298	43.2943	46.7143	53.5328	43.5569	42.666	41.6022	42.9812	40.6008	49.1881	35.6724	39.903
			100	100	100	100	100	100	100	100	100	100	100	100	100	100	100	100	100	100	100	100	100	100	100	100	100	100	100	100	100	100	100	100	100	100	100	100	100	100	100	100	100	100	100	100	100	100	100
lipid length	mol% length of two-tailed PL	26	0	0	0	0	0	0	0	0	0	0	0	0					0	0	0.00799404	0.0131615	0	0	0	0	0	0	0	0	0	0	0	0				0	0	0	0	0	0	0	0	0	0	0	0
		28	0	0	0	0	0	0	0	0	0	0.0362824	0.0412525	0.0348355	0.149248	0.0420141	0.173872	0.134053	0.854236	0.871609	0.790419	0.833918	0.104315	0	0	0	0.140476	0	0	0.0497232	0	0	0	0	0.013039	0	0	0	0	0	0	0	0	0	0.0262302	0	0	0	0
		30	0.226344	0.156973	0.0999761	0.576584	0.56628	0.592175	0.222454	0.408417	0.340402	0.996929	1.00078	1.00605	3.10996	1.58215	3.0942	3.15536	10.0226	12.4047	6.80192	8.29341	2.83364	15.3204	13.3687	9.04922	2.51828	3.38654	4.05864	3.59575	0.484701	0.329955	0.67488	0.755816	0.615586	0.705234	0.736695	0.23259	0.0296668	0.0287169	0.124973	0.102654	0.107498	0.122484	0.134139	0.0980445	0.2355	0.0395669	0
		32	7.67154	7.34919	6.68265	8.97524	9.44385	9.10931	19.021	17.9318	19.7413	6.9348	6.53846	6.68961	19.612	16.0555	15.0224	13.9831	19.895	19.8451	21.5152	20.0542	13.8234	16.8779	18.3082	18.373	13.6994	18.0139	20.298	21.0174	18.8586	15.1463	12.1546	12.213	7.62259	7.85911	8.32078	3.1052	2.88216	2.9719	2.22541	2.66953	2.58162	2.69037	2.78497	2.74136	2.46692	3.299	3.34055
		34	30.6094	31.7658	31.7807	39.4402	41.375	39.0532	33.8078	32.5891	33.9389	27.0486	27.0505	27.6308	35.633	35.5123	33.564	31.1731	41.7662	40.0091	42.1888	42.6788	32.5571	34.5339	33.737	33.1917	32.83	36.0806	36.1614	33.507	30.5908	29.0021	38.9922	38.8121	30.0339	29.9474	30.3163	28.4128	30.2084	27.6556	23.4511	27.591	28.2032	28.798	28.233	28.6355	25.1774	33.825	30.3176
		36	41.8762	42.5833	42.9897	37.3059	35.9615	37.4628	29.0626	29.8568	28.3685	29.2473	29.0112	29.0927	24.9556	27.3484	21.9125	22.2701	20.9366	20.7739	23.1586	22.8649	25.3125	22.2201	23.1373	20.6521	25.0501	23.8403	23.0864	22.7379	29.8745	34.2922	34.9689	35.4302	40.1783	39.8166	39.8837	20.943	21.4756	21.0503	20.4702	19.9651	19.6661	19.8855	20.459	20.4833	19.9158	20.923	20.2442
		38	15.4243	14.5126	14.702	9.91947	8.96697	9.9525	9.82627	10.5761	9.75496	19.2725	19.7858	19.6427	10.7658	13.0811	17.474	18.9084	1.89699	1.83981	1.97265	1.93575	16.7058	7.02962	8.38029	12.1282	17.9295	12.716	10.967	13.2763	10.3459	11.7726	8.77345	8.32832	14.5941	14.8124	14.2941	28.6371	26.5985	28.5956	35.7188	27.9865	27.5101	27.0312	27.506	25.7586	29.4307	23.6351	28.3613
		40	2.87288	2.11782	2.4125	2.16071	2.43465	2.37652	3.6255	3.98435	3.69006	13.0304	12.8672	12.1948	4.46208	5.11481	7.51264	9.45543	1.53628	1.42435	1.25766	1.06736	5.48489	0.966677	1.0728	3.62454	5.8388	3.98915	3.90984	4.63221	4.40438	4.76551	2.88165	2.70686	4.56107	4.48807	4.1192	11.723	11.2638	12.7233	14.6178	12.2423	12.3013	11.6119	12.3237	12.3403	15.0552	9.95739	10.1891
		42	1.2862	1.30948	1.30236	1.48945	1.13843	1.33258	4.35772	4.52192	4.07907	3.24586	3.45069	3.39402	1.31238	1.26365	1.05925	0.883187	2.99576	2.7463	2.22806	2.17779	3.08663	3.05152	1.9957	2.98108	1.92724	1.94985	1.50467	1.18375	5.28692	4.5603	1.52596	1.52186	2.21934	2.189	2.16414	6.86636	7.3847	6.90427	3.31913	9.23366	9.39181	9.64932	8.33707	9.70276	7.52271	8.12977	7.38471
		44	0.0331618	0.204811	0.030045	0.132423	0.113334	0.12085	0.0767179	0.131524	0.0868297	0.187409	0.254134	0.314472	0	0	0.187116	0.0374055	0.0964242	0.085104	0.0786845	0.0807055	0.0917759	0	0	0	0.0662622	0.0235983	0.0140486	0	0.154203	0.131071	0.0283312	0.231853	0.162012	0.182289	0.165129	0.0798909	0.157192	0.0702923	0.0725538	0.209255	0.23847	0.21126	0.195935	0.240083	0.195716	0.19117	0.162489
			100	100	100	100	100	100	100	100	100	100	100	100	100	100	100	100	100	100	100	100	100	100	100	100	100	100	100	100	100	100	100	100	100	100	100	100	100	100	100	100	100	100	100	100	100	100	100
Molar% of PL	mol% of two-tailed phospholipids	Cer	0.542192	0.575508	0.564814	0.653289	0.569768	0.700085	0.381412	0.422421	0.384001	0.485305	0.488714	0.511519	0.252428	0.172942	0.418755	0.363786	0.0334952	0.0269644	0.179321	0.182854	0.156273	0	0.890977	0.917808	0.42582	1.37476	1.48566	1.26	0.318316	0.333056	0.676799	0.685304	0.544155	0.61008	0.569881	0.89554	0.851178	0.765018	0.515847	0.677366	0.698032	0.770828	0.712697	0.818411	0.676919	0.633329	0.665151
		DAG	2.88301	2.8772	3.03585	3.96593	2.52869	4.06309	3.69133	4.41496	3.56216	1.4331	1.44233	1.7164	1.05756	1.64034	0.318955	0.927074	1.52851	2.56623	0.920038	1.04015	0.443201	12.615	3.92771	4.38204	0.755084	0.872992	1.06785	0.625301	2.08011	1.62141	2.91311	1.99578	1.83227	1.5977	1.69488	0.346776	0	0	0	0	0.0481363	0.100187	0	0.154281	0.714346	0	0
		HexCer	1.18296	1.1961	1.21925	0.4811	0.356325	0.348175	0.710007	0.779403	0.677263	0.397027	0.412531	0.418168	0.540251	0.981272	0.152042	0.130771	0.0748809	0.0769156	0.132669	0.166713	0.13748	0	0	0.0648725	0.256114	0.151196	0.152338	0.078587	0.884692	0.559466	0.41377	0.394786	1.5494	1.52217	1.51226	0.0129245	0.0150579	0.0146227	0.00884149	0.0201492	0.0183797	0.0177384	0.0120434	0.0197706	0.0115866	0.0272711	0.0219745
		PA	1.27509	1.30527	1.42402	0.503536	0.296059	0.459997	0.409576	0.42119	0.553779	0	0.33513	0.175902	0.0820053	0	0	0	0.0441915	0.0391397	0.309261	0.330171	0.0169498	0	0	0.0652477	0	0	0	0	0.273579	0.408951	0.196885	0.258963	0.221941	0.139925	0	2.07264	1.68311	1.97271	9.71336	2.54719	3.20551	2.99928	2.432	2.04781	1.67811	1.36289	0
		PC	39.7428	41.9138	40.8277	48.7105	54.5365	48.2729	48.8656	45.1606	50.0666	42.7117	41.7853	43.4053	42.3347	41.1183	55.9307	52.1354	40.4448	43.3327	44.0269	45.3597	44.2068	54.3756	68.8264	62.316	50.7597	65.3432	67.6259	68.7602	38.8422	36.841	51.1743	52.9596	41.0116	41.7032	42.7568	28.4193	30.7728	28.4112	19.3919	25.7207	25.6088	26.6442	27.0817	27.6336	28.0692	33.4318	31.164
		PC O-	7.91773	8.05985	8.19962	17.9964	19.3243	17.4429	10.3861	9.67079	10.53	4.06507	4.05298	4.29647	10.6705	9.40663	1.30727	2.83272	1.78491	1.85496	2.62229	2.40798	1.01941	0.5231	0	0.947502	2.30448	2.33996	3.33713	2.96917	9.4864	10.0636	19.5598	19.5951	5.32035	5.4005	5.52566	1.32545	1.54997	1.4284	0.796646	1.15473	1.118	1.15829	1.24097	1.36178	1.60339	1.39771	1.29902
		PE	14.0984	12.6326	12.8544	5.55708	4.35077	5.89164	4.2718	5.02615	4.10356	12.3799	13.4992	12.5602	3.9382	5.25523	18.845	14.1569	14.4023	13.4264	18.1237	18.3798	21.8147	5.61034	9.59915	7.63859	20.3144	9.64021	8.63224	10.4398	6.2547	5.5076	6.25186	5.96691	14.8062	14.1979	14.6235	15.6184	15.9525	15.2894	10.5333	16.7936	15.8951	15.9863	16.188	15.7605	13.5642	16.9652	15.6647
		PE O-	9.67779	8.64602	9.1616	6.67071	5.3038	6.56978	7.63962	8.49425	7.54476	11.7365	12.7855	11.8945	13.9974	10.579	6.9472	7.61096	14.3296	13.6822	10.7264	10.2289	15.0519	4.92751	3.60558	3.02858	12.7302	5.79108	5.04235	5.72691	13.0797	11.7799	4.92174	4.34694	6.84996	6.63865	6.88249	12.9217	13.4585	12.8896	7.55334	15.0141	13.4818	14.1053	13.915	13.7128	12.649	13.1374	12.1025
		PG	0.545064	0.742746	1.01421	1.88735	1.49478	2.11456	0.12761	0.174973	0.106247	0.528748	0.642829	0.734076	0.0438031	0.0143534	0.488834	0.364185	0.0891515	0.088962	0.557283	0.464456	0.149034	0	0	0	0.180241	0.367388	0.593955	0.29057	0.0314109	0.0974785	1.74815	1.80881	0.726561	0.595389	0.608151	0	0	0	0	0	0	0	0	0	0.0323612	0	0
		PI	8.33636	7.61017	7.60379	7.38755	6.46469	7.94669	3.59789	4.06732	3.44034	10.6384	10.5081	10.1566	4.36182	3.81104	7.83495	10.7566	3.40419	2.98993	4.56629	4.73797	2.5147	0.660767	2.39019	3.56336	3.91095	4.19402	3.77394	3.50898	2.51563	4.85158	6.70895	6.63122	9.30247	9.94348	8.91679	1.412	1.60264	1.25174	1.11827	1.30177	1.3822	1.00837	1.22442	1.77042	0.794769	0	0.451072
		PS	11.7523	12.374	11.8971	3.55656	2.84076	3.68896	10.1603	11.0579	9.69808	9.49722	7.9387	7.6265	17.3769	18.2841	3.53345	7.64408	9.41268	8.19214	7.91845	7.282	5.24287	4.52383	3.73557	4.35923	3.46154	5.70973	5.05874	3.48211	12.8928	18.0944	2.69052	2.59685	10.1087	9.80425	9.09364	22.7659	18.1637	24.2697	43.4082	17.5775	18.8336	17.5304	19.8007	16.7893	25.0657	14.7566	21.5956
		SM	2.04631	2.0668	2.19754	2.62997	1.93357	2.50123	9.75881	10.31	9.3332	6.12713	6.10873	6.50434	5.3444	8.73682	4.22289	3.07758	14.4513	13.7235	9.91742	9.41936	9.24661	16.7639	7.0244	12.7167	4.90148	4.21547	3.22994	2.85836	13.3405	9.84163	2.74416	2.7598	7.7263	7.84671	7.816	14.2094	15.9505	13.7077	6.96026	19.1929	19.7105	19.6791	17.3925	19.9315	15.1404	18.2878	17.0358
			100	100	100	100	100	100	100	100	100	100	100	100	100	100	100	100	100	100	100	100	100	100	100	100	100	100	100	100	100	100	100	100	100	100	100	100	100	100	100	100	100	100	100	100	100	100	100
Molar% of Sterols and Two-Tailed Phospholipids	mol% of sterol + two-tailed lipids	Cer	0.500735	0.526839	0.517554	0.598992	0.534666	0.647035	0.279574	0.306967	0.281472	0.369064	0.373094	0.390533	0.165867	0.112124	0.345914	0.29325	0.0242337	0.019845	0.143503	0.146212	0.116054	0	0.580328	0.486494	0.349456	1.10274	1.20986	1.0186	0.312832	0.210537	0.559575	0.574416	0.429407	0.478856	0.44623	0.469405	0.443384	0.405165	0.396978						0.392515	0.362616	0.363924
		DAG	2.66257	2.63388	2.78183	3.63631	2.37291	3.7552	2.70573	3.20828	2.61106	1.08984	1.1011	1.31043	0.694909	1.06349	0.263474	0.747318	1.10587	1.88867	0.73627	0.831713	0.329138	5.9462	2.55827	2.32275	0.619672	0.700256	0.869617	0.505499	2.04428	1.02495	2.40855	1.67284	1.44589	1.25404	1.32713	0.181766	0	0	0						0.414217	0	0
		HexCer	1.0925	1.09495	1.11723	0.441114	0.334373	0.321791	0.520433	0.56638	0.496432	0.30193	0.314934	0.319262	0.354991	0.636191	0.125595	0.105415	0.054176	0.0566075	0.106169	0.133305	0.102097	0	0	0.0343863	0.210184	0.121279	0.124058	0.0635305	0.86945	0.353658	0.342103	0.330906	1.22267	1.19476	1.18414	0.00677447	0.00784377	0.00774441	0.0068041						0.00671853	0.0156142	0.0120229
		PA	1.1776	1.19488	1.30487	0.461686	0.277819	0.42514	0.300218	0.306073	0.405919	0	0.255845	0.134297	0.0538845	0	0	0	0.0319724	0.0288056	0.24749	0.264009	0.0125875	0	0	0.0345853	0	0	0	0	0.268865	0.258513	0.162783	0.21706	0.175139	0.109828	0	1.08639	0.876743	1.04478	7.47506						0.973063	0.780331	0
		PC	36.704	38.3692	37.4115	44.662	51.1767	44.6149	35.8184	32.8175	36.6987	32.4813	31.8997	33.139	27.8175	26.6583	46.2018	42.0265	29.2616	31.8915	35.233	36.2701	32.8296	25.6304	44.8293	33.0313	41.6568	52.4139	55.0719	55.5864	38.173	23.2885	42.3107	44.3903	32.3633	32.7332	33.4796	14.8962	16.0298	15.047	14.9233						16.276	19.1416	17.0508
		PC O-	7.31232	7.37825	7.51353	16.5007	18.1337	16.1212	7.61296	7.02762	7.71847	3.09139	3.09412	3.28026	7.01141	6.09863	1.07988	2.28347	1.29138	1.36519	2.09851	1.92545	0.757051	0.246567	0	0.502234	1.89121	1.87696	2.71763	2.4003	9.32297	6.36155	16.1719	16.4244	4.19842	4.23889	4.32672	0.694744	0.807392	0.756503	0.613071						0.929736	0.800269	0.710731
		PE	13.0204	11.5642	11.7789	5.09522	4.08273	5.44518	3.13121	3.65243	3.0079	9.4146	10.3056	9.58946	2.58774	3.40714	15.567	11.4119	10.42	9.88141	14.5037	14.6967	16.2004	2.64448	6.2523	4.04892	16.6713	7.73273	7.02976	8.43962	6.14694	3.48155	5.16901	5.00142	11.684	11.144	11.4505	8.18651	8.30979	8.09749	8.10607						7.86528	9.71356	8.57065
		PE O-	8.9378	7.91484	8.39502	6.11629	4.97705	6.07194	5.59982	6.17264	5.53029	8.92532	9.76066	9.08121	9.19751	6.85872	5.73876	6.13523	10.3674	10.0697	8.58392	8.17914	11.1781	2.32262	2.34846	1.60533	10.4472	4.64522	4.1063	4.62969	12.8543	7.4465	4.06927	3.64357	5.40547	5.21072	5.38916	6.77304	7.01061	6.82654	5.81278						7.33461	7.5219	6.62167
		PG	0.503387	0.679934	0.929347	1.73049	1.40269	1.95432	0.0935376	0.127151	0.077879	0.402101	0.490748	0.56045	0.0287824	0.00930578	0.403804	0.293572	0.0645008	0.0654733	0.445972	0.371385	0.110678	0	0	0	0.147917	0.294694	0.483694	0.2349	0.0308698	0.0616197	1.44536	1.51613	0.573348	0.467325	0.476197	0	0	0	0						0.0187648	0	0
		PI	7.69894	6.9666	6.96755	6.77355	6.06642	7.34452	2.63725	2.95566	2.52176	8.09023	8.02205	7.75433	2.86609	2.47083	6.4721	8.67095	2.46292	2.2005	3.65422	3.78854	1.86751	0.311458	1.55683	1.8888	3.20958	3.36416	3.07335	2.83669	2.47228	3.06686	5.54693	5.55823	7.34081	7.80471	6.98205	0.74011	0.834826	0.66294	0.860582						0.460851	0	0.246795
		PS	10.8537	11.3276	10.9017	3.26096	2.66575	3.40942	7.44744	8.03563	7.10867	7.22242	6.06056	5.82266	11.4181	11.8542	2.91882	6.16193	6.81004	6.02916	6.33682	5.82277	3.89355	2.13234	2.43312	2.31066	2.84077	4.57996	4.11964	2.81497	12.6706	11.4381	2.22451	2.17666	7.97704	7.69542	7.12053	11.9329	9.4616	12.8536	33.4054						14.5345	8.44898	11.8156
		SM	1.88984	1.89202	2.01366	2.41138	1.81445	2.31169	7.15318	7.49215	6.84122	4.65954	4.66352	4.96592	3.51173	5.66437	3.48833	2.48085	10.4554	10.1001	7.93652	7.53183	6.86688	7.90177	4.57527	6.74064	4.02248	3.38136	2.63034	2.31072	13.1107	6.22125	2.26886	2.31324	6.09702	6.15893	6.12011	7.448	8.30873	7.25981	5.35637						8.77921	10.4708	9.32083
		Chol	7.64626	8.45675	8.36735	8.31128	6.16077	7.57772	26.7003	27.3315	26.7002	23.9523	23.6581	23.6522	34.2914	35.1667	17.3946	19.3896	27.6504	26.4031	19.974	20.0388	25.7363	52.8642	34.8661	46.9939	17.9334	19.7868	18.5639	19.1591	1.72286	36.7864	17.3204	16.1808	21.0875	21.5093	21.6976	47.5841	47.9093	47.0384	23.0435						42.0145	42.7444	45.287
			100	100	100	100	100	100	100	100	100	100	100	100	100	100	100	100	100	100	100	100	100	100	100	100	100	100	100	100	100	100	100	100	100	100	100	100	100	100	100	0	0	0	0	0	100	100	100
[truncated: 41 more columns]

## Sheet: CHO - 20160912
Jin Cho-20160912-CHO WT whole cells
pM of lipids								JC01	JC02	JC03
feature	class	structuralcategory	functio0lcategory	totallength	totaldb	dbcorr	totaloh	WT	WT	WT
CE 14:0;0	CE	STE	STO	14	0	0	0	0	0	0
CE 15:0;0	CE	STE	STO	15	0	0	0	0	0	0
CE 16:0;0	CE	STE	STO	16	0	0	0	0	0	0
CE 16:1;0	CE	STE	STO	16	1	1	0	0	0	0
CE 17:0;0	CE	STE	STO	17	0	0	0	0	0	0
CE 17:1;0	CE	STE	STO	17	1	1	0	0	0	0
CE 18:0;0	CE	STE	STO	18	0	0	0	0	0	0
CE 18:1;0	CE	STE	STO	18	1	1	0	15.6856	16.2461	15.1803
CE 18:2;0	CE	STE	STO	18	2	2	0	0	0	0
CE 20:1;0	CE	STE	STO	20	1	1	0	0	0	0
CE 20:2;0	CE	STE	STO	20	2	2	0	3.55042	0	4.27246
CE 22:4;0	CE	STE	STO	22	4	4	0	0	0	0
CE 22:6;0	CE	STE	STO	22	6	6	0	0	0	0
CE 24:1;0	CE	STE	STO	24	1	1	0	0	0	0
Cer 32:0;2	Cer	SL	MEM	32	0	0	2	0	0	0
Cer 32:1;2	Cer	SL	MEM	32	1	1	2	0	0.103628	0.0931615
Cer 32:2;2	Cer	SL	MEM	32	2	2	2	0	0	0
Cer 34:0;2	Cer	SL	MEM	34	0	0	2	0.627082	0.598012	0.622088
Cer 34:0;3	Cer	SL	MEM	34	0	0	3	0	0	0
Cer 34:1;2	Cer	SL	MEM	34	1	1	2	3.76676	3.62889	3.94361
Cer 34:1;3	Cer	SL	MEM	34	1	1	3	0	0	0.101462
Cer 34:2;2	Cer	SL	MEM	34	2	2	2	0	0	0.113476
Cer 36:0;2	Cer	SL	MEM	36	0	0	2	0.183795	0.192968	0.18488
Cer 36:1;2	Cer	SL	MEM	36	1	1	2	0.552656	0.610426	0.573665
Cer 36:1;3	Cer	SL	MEM	36	1	1	3	0	0	0
Cer 36:2;2	Cer	SL	MEM	36	2	2	2	0	0	0
Cer 38:0;2	Cer	SL	MEM	38	0	0	2	0.102994	0.130095	0.165939
Cer 38:1;2	Cer	SL	MEM	38	1	1	2	0.444693	0.425462	0.444161
Cer 38:1;3	Cer	SL	MEM	38	1	1	3	0	0	0
Cer 38:2;2	Cer	SL	MEM	38	2	2	2	0	0	0
Cer 38:2;3	Cer	SL	MEM	38	2	2	3	0	0	0
Cer 40:0;2	Cer	SL	MEM	40	0	0	2	0.176102	0.134629	0.20907
Cer 40:0;3	Cer	SL	MEM	40	0	0	3	0	0	0
Cer 40:1;2	Cer	SL	MEM	40	1	1	2	0.696801	0.618541	0.666716
Cer 40:1;3	Cer	SL	MEM	40	1	1	3	0	0	0
Cer 40:2;2	Cer	SL	MEM	40	2	2	2	0	0	0
Cer 42:0;2	Cer	SL	MEM	42	0	0	2	0.247077	0.189002	0.239142
Cer 42:0;3	Cer	SL	MEM	42	0	0	3	0.224695	0.176563	0.207085
Cer 42:0;4	Cer	SL	MEM	42	0	0	4	0	0	0
Cer 42:1;2	Cer	SL	MEM	42	1	1	2	2.14331	2.14654	2.20296
Cer 42:1;3	Cer	SL	MEM	42	1	1	3	0.228011	0.225443	0.223913
Cer 42:1;4	Cer	SL	MEM	42	1	1	4	0	0	0
Cer 42:2;2	Cer	SL	MEM	42	2	2	2	2.12904	2.0517	2.16175
Cer 42:2;3	Cer	SL	MEM	42	2	2	3	0	0	0
Cer 44:0;2	Cer	SL	MEM	44	0	0	2	0	0	0
Cer 44:0;3	Cer	SL	MEM	44	0	0	3	0	0	0
Cer 44:0;4	Cer	SL	MEM	44	0	0	4	0	0	0
Cer 44:1;2	Cer	SL	MEM	44	1	1	2	0.25229	0.214116	0.238145
Cer 44:1;3	Cer	SL	MEM	44	1	1	3	0	0	0
Cer 44:1;4	Cer	SL	MEM	44	1	1	4	0	0	0
Cer 44:2;2	Cer	SL	MEM	44	2	2	2	0.232618	0.180164	0.230501
Chol	Chol	ST	MEM	27	1	1	0	183.362	186.622	204.057
CL 64:3;0	CL	GPL	MEM	64	3	3	0	0	0	0
CL 66:2;0	CL	GPL	MEM	66	2	2	0	0	0	0
CL 66:3;0	CL	GPL	MEM	66	3	3	0	0	0	0
CL 66:4;0	CL	GPL	MEM	66	4	4	0	0.317396	0.290688	0.19476
CL 66:5;0	CL	GPL	MEM	66	5	5	0	0	0	0
CL 68:2;0	CL	GPL	MEM	68	2	2	0	0	0	0
CL 68:3;0	CL	GPL	MEM	68	3	3	0	0	0	0
CL 68:4;0	CL	GPL	MEM	68	4	4	0	1.31122	1.35536	1.43736
CL 68:5;0	CL	GPL	MEM	68	5	5	0	0.423737	0.401796	0.415903
CL 68:6;0	CL	GPL	MEM	68	6	6	0	0	0	0
CL 70:0;0	CL	GPL	MEM	70	0	0	0	0	0	0
CL 70:2;0	CL	GPL	MEM	70	2	2	0	0	0	0
CL 70:3;0	CL	GPL	MEM	70	3	3	0	0	0	0
CL 70:4;0	CL	GPL	MEM	70	4	4	0	3.24892	2.99354	2.87073
CL 70:5;0	CL	GPL	MEM	70	5	5	0	1.02009	0.943508	1.05113
CL 70:6;0	CL	GPL	MEM	70	6	6	0	0.242011	0	0.304524
CL 70:7;0	CL	GPL	MEM	70	7	7	0	0	0	0
CL 72:2;0	CL	GPL	MEM	72	2	2	0	0	0	0
CL 72:3;0	CL	GPL	MEM	72	3	3	0	0	0	0
CL 72:4;0	CL	GPL	MEM	72	4	4	0	2.21197	2.28355	2.23274
CL 72:5;0	CL	GPL	MEM	72	5	5	0	0.50039	1.24621	1.00855
CL 72:6;0	CL	GPL	MEM	72	6	6	0	0.509707	0.475573	0.485628
CL 72:7;0	CL	GPL	MEM	72	7	7	0	0	0	0.279499
CL 72:8;0	CL	GPL	MEM	72	8	8	0	0	0	0
CL 72:9;0	CL	GPL	MEM	72	9	9	0	0	0	0
CL 74:5;0	CL	GPL	MEM	74	5	5	0	0	0	0
CL 74:6;0	CL	GPL	MEM	74	6	6	0	0.340841	0	0.376778
CL 74:7;0	CL	GPL	MEM	74	7	7	0	0	0	0
CL 74:8;0	CL	GPL	MEM	74	8	8	0	0	0	0
CL 74:9;0	CL	GPL	MEM	74	9	9	0	0	0	0
CL 76:10;0	CL	GPL	MEM	76	10	10	0	0	0	0
CL 76:4;0	CL	GPL	MEM	76	4	4	0	0	0	0
CL 76:8;0	CL	GPL	MEM	76	8	8	0	0	0	0
CL 76:9;0	CL	GPL	MEM	76	9	9	0	0	0	0
CL 78:6;0	CL	GPL	MEM	78	6	6	0	0	0	0
CL 78:8;0	CL	GPL	MEM	78	8	8	0	0	0	0
CL 80:5;0	CL	GPL	MEM	80	5	5	0	0	0	0
CL 82:6;0	CL	GPL	MEM	82	6	6	0	0	0	0
DAG 12:0;0-18:0;0	DAG	GL	MEM	30	0	0	0	0	0	0
DAG 14:0;0-16:0;0	DAG	GL	MEM	30	0	0	0	0	0	0
DAG 14:0;0-17:0;0	DAG	GL	MEM	31	0	0	0	0.251738	0	0
DAG 14:0;0-18:0;0	DAG	GL	MEM	32	0	0	0	0	0	0
DAG 14:0;0-18:1;0	DAG	GL	MEM	32	1	1	0	0.779318	0.765929	0.602232
DAG 14:0;0-20:1;0	DAG	GL	MEM	34	1	1	0	0	0	0
DAG 15:0;0-15:0;0	DAG	GL	MEM	30	0	0	0	0.175612	0	0
DAG 15:0;0-16:0;0	DAG	GL	MEM	31	0	0	0	2.02525	0	0
DAG 15:0;0-17:0;0	DAG	GL	MEM	32	0	0	0	0.192181	0	0
DAG 15:0;0-17:1;0	DAG	GL	MEM	32	1	1	0	0	0	0
DAG 15:0;0-18:0;0	DAG	GL	MEM	33	0	0	0	0.251611	0	0
DAG 15:0;0-18:1;0	DAG	GL	MEM	33	1	1	0	0	0	0
DAG 16:0;0-16:0;0	DAG	GL	MEM	32	0	0	0	0	0	0
DAG 16:0;0-16:1;0	DAG	GL	MEM	32	1	1	0	2.72276	2.68332	2.00064
DAG 16:0;0-17:0;0	DAG	GL	MEM	33	0	0	0	1.83766	0	0
DAG 16:0;0-17:1;0	DAG	GL	MEM	33	1	1	0	0	0	0
DAG 16:0;0-18:1;0	DAG	GL	MEM	34	1	1	0	14.1271	13.4692	14.8844
DAG 16:0;0-18:2;0	DAG	GL	MEM	34	2	2	0	0.779148	0.690124	0.732811
DAG 16:0;0-19:1;0	DAG	GL	MEM	35	1	1	0	0	0	0
DAG 16:0;0-20:1;0	DAG	GL	MEM	36	1	1	0	0.654397	0.546613	0.656504
DAG 16:0;0-20:2;0	DAG	GL	MEM	36	2	2	0	0	0.763659	0.833057
DAG 16:0;0-20:3;0	DAG	GL	MEM	36	3	3	0	0	0	0
DAG 16:0;0-20:4;0	DAG	GL	MEM	36	4	4	0	0	0	0
DAG 16:0;0-22:4;0	DAG	GL	MEM	38	4	4	0	0	0	0
DAG 16:0;0-22:5;0	DAG	GL	MEM	38	5	5	0	0	0	0
DAG 16:0;0-22:6;0	DAG	GL	MEM	38	6	6	0	0	0	0
DAG 16:1;0-17:0;0	DAG	GL	MEM	33	1	1	0	0	0	0
DAG 16:1;0-17:1;0	DAG	GL	MEM	33	2	2	0	0	0	0
DAG 16:1;0-18:0;0	DAG	GL	MEM	34	1	1	0	0.802675	0.719799	0.80005
DAG 16:1;0-18:1;0	DAG	GL	MEM	34	2	2	0	4.94552	4.97576	4.98404
DAG 16:1;0-20:1;0	DAG	GL	MEM	36	2	2	0	0.175557	0.151496	0.161015
DAG 16:1;0-20:2;0	DAG	GL	MEM	36	3	3	0	0.29342	0.350291	0.314131
DAG 16:1;0-20:3;0	DAG	GL	MEM	36	4	4	0	0	0	0
DAG 17:0;0-18:1;0	DAG	GL	MEM	35	1	1	0	0	0	0
DAG 17:0;0-20:2;0	DAG	GL	MEM	37	2	2	0	0	0	0
DAG 17:0;0-20:3;0	DAG	GL	MEM	37	3	3	0	0	0	0
DAG 17:1;0-17:1;0	DAG	GL	MEM	34	2	2	0	0.0561771	0	0
DAG 17:1;0-18:0;0	DAG	GL	MEM	35	1	1	0	0	0	0
DAG 17:1;0-18:1;0	DAG	GL	MEM	35	2	2	0	0	0	0
DAG 18:0;0-18:1;0	DAG	GL	MEM	36	1	1	0	5.68962	4.80059	5.28377
DAG 18:0;0-18:2;0	DAG	GL	MEM	36	2	2	0	0.18265	0.209524	0.264492
DAG 18:0;0-18:3;0	DAG	GL	MEM	36	3	3	0	0	0	0
DAG 18:0;0-19:3;0	DAG	GL	MEM	37	3	3	0	0	0	0
DAG 18:0;0-20:1;0	DAG	GL	MEM	38	1	1	0	0	0	0
DAG 18:0;0-20:2;0	DAG	GL	MEM	38	2	2	0	1.55686	0	1.31835
DAG 18:0;0-20:3;0	DAG	GL	MEM	38	3	3	0	0	0	0
DAG 18:0;0-20:4;0	DAG	GL	MEM	38	4	4	0	0	0	0
DAG 18:1;0-18:1;0	DAG	GL	MEM	36	2	2	0	16.0984	15.378	15.9958
DAG 18:1;0-18:2;0	DAG	GL	MEM	36	3	3	0	2.83366	2.35178	2.36333
DAG 18:1;0-18:3;0	DAG	GL	MEM	36	4	4	0	0	0	0
DAG 18:1;0-19:1;0	DAG	GL	MEM	37	2	2	0	5.76373	10.2679	15.1267
DAG 18:1;0-20:1;0	DAG	GL	MEM	38	2	2	0	1.65499	0	1.52001
DAG 18:1;0-20:2;0	DAG	GL	MEM	38	3	3	0	0	0	0
DAG 18:1;0-20:3;0	DAG	GL	MEM	38	4	4	0	0	0	0
DAG 18:1;0-20:4;0	DAG	GL	MEM	38	5	5	0	0	0	0
DAG 18:2;0-18:2;0	DAG	GL	MEM	36	4	4	0	0	0	0
DAG 18:2;0-20:4;0	DAG	GL	MEM	38	6	6	0	0	0	0
HexCer 30:2;2	HexCer	SL	MEM	30	2	2	2	0	0	0
HexCer 32:2;3	HexCer	SL	MEM	32	2	2	3	0	0	0
HexCer 34:0;2	HexCer	SL	MEM	34	0	0	2	0.608836	0.632754	0.640335
HexCer 34:0;3	HexCer	SL	MEM	34	0	0	3	0.504237	0.489081	0.435729
HexCer 34:1;2	HexCer	SL	MEM	34	1	1	2	9.86783	8.8184	10.5481
HexCer 34:1;3	HexCer	SL	MEM	34	1	1	3	0.408975	0.29945	0.426088
HexCer 36:0;2	HexCer	SL	MEM	36	0	0	2	0	0	0
HexCer 36:1;2	HexCer	SL	MEM	36	1	1	2	1.10398	1.21467	1.25864
HexCer 38:0;2	HexCer	SL	MEM	38	0	0	2	0	0	0
HexCer 38:0;3	HexCer	SL	MEM	38	0	0	3	0	0	0
HexCer 38:1;2	HexCer	SL	MEM	38	1	1	2	1.32804	1.34913	1.50459
HexCer 40:0;2	HexCer	SL	MEM	40	0	0	2	0	0	0
HexCer 40:0;3	HexCer	SL	MEM	40	0	0	3	0.473675	0.487014	0.443543
HexCer 40:1;2	HexCer	SL	MEM	40	1	1	2	1.68314	1.6358	1.74631
HexCer 40:1;3	HexCer	SL	MEM	40	1	1	3	0.497261	0.425349	0.431752
HexCer 40:2;2	HexCer	SL	MEM	40	2	2	2	0	0	0.238238
HexCer 42:0;2	HexCer	SL	MEM	42	0	0	2	0	0	0
HexCer 42:0;3	HexCer	SL	MEM	42	0	0	3	1.01227	0.973833	1.04307
HexCer 42:1;2	HexCer	SL	MEM	42	1	1	2	2.77471	2.5936	2.92404
HexCer 42:1;3	HexCer	SL	MEM	42	1	1	3	2.50748	2.41446	2.53467
HexCer 42:2;2	HexCer	SL	MEM	42	2	2	2	2.58455	2.37445	2.31233
HexCer 42:2;3	HexCer	SL	MEM	42	2	2	3	0.594418	0.455085	0.556066
HexCer 44:0;3	HexCer	SL	MEM	44	0	0	3	0	0	0
HexCer 44:1;3	HexCer	SL	MEM	44	1	1	3	0	0	0.20276
HexCer 44:2;2	HexCer	SL	MEM	44	2	2	2	0.249527	0	0
LPA 16:0;0	LPA	GPL	LYS	16	0	0	0	0	0	0
LPA 16:1;0	LPA	GPL	LYS	16	1	1	0	0	0	0
LPA 18:0;0	LPA	GPL	LYS	18	0	0	0	0	0	0
LPA 18:1;0	LPA	GPL	LYS	18	1	1	0	2.54016	0	2.62108
LPA 18:2;0	LPA	GPL	LYS	18	2	2	0	0	0	0
LPA 20:4;0	LPA	GPL	LYS	20	4	4	0	0	0	0
LPA 20:5;0	LPA	GPL	LYS	20	5	5	0	0	0	0
LPA 22:4;0	LPA	GPL	LYS	22	4	4	0	0	0	0
LPA 22:5;0	LPA	GPL	LYS	22	5	5	0	0	0	0
LPA 22:6;0	LPA	GPL	LYS	22	6	6	0	0	0	0
LPA 24:3;0	LPA	GPL	LYS	24	3	3	0	0	0	0
LPC 14:1;0	LPC	GPL	LYS	14	1	1	0	0	0	0
LPC 16:0;0	LPC	GPL	LYS	16	0	0	0	0.732612	0.824626	0.945444
LPC 16:1;0	LPC	GPL	LYS	16	1	1	0	0	0	0
LPC 18:0;0	LPC	GPL	LYS	18	0	0	0	0	0	0
LPC 18:1;0	LPC	GPL	LYS	18	1	1	0	1.00801	1.00939	1.05235
LPC 18:2;0	LPC	GPL	LYS	18	2	2	0	0	0	0
LPC 20:1;0	LPC	GPL	LYS	20	1	1	0	0	0	0
LPC 20:3;0	LPC	GPL	LYS	20	3	3	0	0	0	0
LPC 20:4;0	LPC	GPL	LYS	20	4	4	0	0	0	0
LPC 22:6;0	LPC	GPL	LYS	22	6	6	0	0	0	0
LPC O- 16:0;0	LPC O-	GPL	LYS	16	0	0	0	0	0	0
LPC O- 16:1;0	LPC O-	GPL	LYS	16	1	0	0	0	0	0
LPC O- 18:0;0	LPC O-	GPL	LYS	18	0	0	0	0	0	0
LPC O- 18:1;0	LPC O-	GPL	LYS	18	1	0	0	0.672607	0.702281	0.700302
LPE 16:0;0	LPE	GPL	LYS	16	0	0	0	0	0	0
LPE 16:1;0	LPE	GPL	LYS	16	1	1	0	0	0	0
LPE 16:2;0	LPE	GPL	LYS	16	2	2	0	0	0	0
LPE 18:0;0	LPE	GPL	LYS	18	0	0	0	0.910627	0.849657	0.900002
LPE 18:1;0	LPE	GPL	LYS	18	1	1	0	0.976656	1.0064	0.844297
LPE 18:2;0	LPE	GPL	LYS	18	2	2	0	0	0	0
LPE 20:1;0	LPE	GPL	LYS	20	1	1	0	0	0	0
LPE 20:2;0	LPE	GPL	LYS	20	2	2	0	0	0	0
LPE 20:3;0	LPE	GPL	LYS	20	3	3	0	0	0	0
LPE 20:4;0	LPE	GPL	LYS	20	4	4	0	0.280748	0	0
LPE 22:3;0	LPE	GPL	LYS	22	3	3	0	0	0	0
LPE O- 16:0;0	LPE O-	GPL	LYS	16	0	0	0	0	0	0
LPE O- 16:1;0	LPE O-	GPL	LYS	16	1	0	0	0.366486	0.339824	0.297455
LPE O- 18:0;0	LPE O-	GPL	LYS	18	0	0	0	0	0	0
LPE O- 18:1;0	LPE O-	GPL	LYS	18	1	0	0	0.977015	0.909592	0.98839
LPE O- 18:2;0	LPE O-	GPL	LYS	18	2	1	0	0.60503	0.573181	0.664231
LPI 14:0;0	LPI	GPL	LYS	14	0	0	0	0	0	0
LPI 16:0;0	LPI	GPL	LYS	16	0	0	0	0	0	0
LPI 16:1;0	LPI	GPL	LYS	16	1	1	0	0	0	0
LPI 18:0;0	LPI	GPL	LYS	18	0	0	0	12.0897	10.9913	8.96162
LPI 18:1;0	LPI	GPL	LYS	18	1	1	0	0	0	2.12221
LPI 18:2;0	LPI	GPL	LYS	18	2	2	0	0	0	0
LPI 20:2;0	LPI	GPL	LYS	20	2	2	0	0	0	0
LPI 20:4;0	LPI	GPL	LYS	20	4	4	0	0	0	0
LPI 20:5;0	LPI	GPL	LYS	20	5	5	0	0	0	0
LPI 22:6;0	LPI	GPL	LYS	22	6	6	0	0	0	0
LPS 16:1;0	LPS	GPL	LYS	16	1	1	0	0	0	0
LPS 18:0;0	LPS	GPL	LYS	18	0	0	0	0	0	6.37273
LPS 18:1;0	LPS	GPL	LYS	18	1	1	0	0	0	0
LPS 20:0;0	LPS	GPL	LYS	20	0	0	0	0	0	0
LPS 20:2;0	LPS	GPL	LYS	20	2	2	0	0	0	0
LPS 20:3;0	LPS	GPL	LYS	20	3	3	0	0	0	0
LPS 20:4;0	LPS	GPL	LYS	20	4	4	0	0	0	0
LPS 22:0;0	LPS	GPL	LYS	22	0	0	0	0	0	0
LPS 22:1;0	LPS	GPL	LYS	22	1	1	0	0	0	0
LPS 22:6;0	LPS	GPL	LYS	22	6	6	0	0	0	0
PA 14:0;0-16:0;0	PA	GPL	MEM	30	0	0	0	0	0	0
PA 14:0;0-17:0;0	PA	GPL	MEM	31	0	0	0	0	0	0
PA 14:0;0-18:0;0	PA	GPL	MEM	32	0	0	0	0	0	0
PA 14:0;0-18:1;0	PA	GPL	MEM	32	1	1	0	0	0	0
PA 14:0;0-18:2;0	PA	GPL	MEM	32	2	2	0	0	0	0
PA 14:0;0-20:4;0	PA	GPL	MEM	34	4	4	0	0	0	0
PA 15:0;0-15:0;0	PA	GPL	MEM	30	0	0	0	0	0	0
PA 15:0;0-16:0;0	PA	GPL	MEM	31	0	0	0	0	0	0
PA 15:0;0-16:1;0	PA	GPL	MEM	31	1	1	0	0	0	0
PA 15:0;0-18:0;0	PA	GPL	MEM	33	0	0	0	0	0	0
PA 15:0;0-18:1;0	PA	GPL	MEM	33	1	1	0	0	0	0
PA 15:0;0-18:2;0	PA	GPL	MEM	33	2	2	0	0	0	0
PA 15:0;0-20:3;0	PA	GPL	MEM	35	3	3	0	0	0	0
PA 15:0;0-20:4;0	PA	GPL	MEM	35	4	4	0	0	0	0
PA 15:0;0-22:4;0	PA	GPL	MEM	37	4	4	0	0	0	0
PA 16:0;0-16:0;0	PA	GPL	MEM	32	0	0	0	0	0	0
PA 16:0;0-16:1;0	PA	GPL	MEM	32	1	1	0	0	0	0
PA 16:0;0-17:0;0	PA	GPL	MEM	33	0	0	0	0	0	0
PA 16:0;0-17:1;0	PA	GPL	MEM	33	1	1	0	0	0	0
PA 16:0;0-18:0;0	PA	GPL	MEM	34	0	0	0	0	0	0
PA 16:0;0-18:1;0	PA	GPL	MEM	34	1	1	0	11.176	12.7029	13.562
PA 16:0;0-18:2;0	PA	GPL	MEM	34	2	2	0	0	0	0
PA 16:0;0-18:3;0	PA	GPL	MEM	34	3	3	0	0	0	0
PA 16:0;0-19:1;0	PA	GPL	MEM	35	1	1	0	0	0	0
PA 16:0;0-20:0;0	PA	GPL	MEM	36	0	0	0	0	0	0
PA 16:0;0-20:1;0	PA	GPL	MEM	36	1	1	0	0	0	0
PA 16:0;0-20:2;0	PA	GPL	MEM	36	2	2	0	0	0	0
PA 16:0;0-20:3;0	PA	GPL	MEM	36	3	3	0	0	0	0
PA 16:0;0-20:4;0	PA	GPL	MEM	36	4	4	0	0	0	0
PA 16:0;0-20:5;0	PA	GPL	MEM	36	5	5	0	0	0	0
PA 16:0;0-22:1;0	PA	GPL	MEM	38	1	1	0	0	0	0
PA 16:0;0-22:2;0	PA	GPL	MEM	38	2	2	0	0	0	0
PA 16:0;0-22:4;0	PA	GPL	MEM	38	4	4	0	0	0	0
PA 16:0;0-22:5;0	PA	GPL	MEM	38	5	5	0	0	0	0
PA 16:0;0-22:6;0	PA	GPL	MEM	38	6	6	0	0	0	0
PA 16:1;0-16:1;0	PA	GPL	MEM	32	2	2	0	0	0	0
PA 16:1;0-17:0;0	PA	GPL	MEM	33	1	1	0	0	0	0
PA 16:1;0-18:0;0	PA	GPL	MEM	34	1	1	0	1.08904	0	1.0693
PA 16:1;0-18:1;0	PA	GPL	MEM	34	2	2	0	0	0	0
PA 16:1;0-18:2;0	PA	GPL	MEM	34	3	3	0	0	0	0
PA 16:1;0-20:2;0	PA	GPL	MEM	36	3	3	0	0	0	0
PA 16:1;0-20:3;0	PA	GPL	MEM	36	4	4	0	0	0	0
PA 16:1;0-20:4;0	PA	GPL	MEM	36	5	5	0	0	0	0
PA 16:1;0-22:4;0	PA	GPL	MEM	38	5	5	0	0	0	0
PA 16:1;0-22:5;0	PA	GPL	MEM	38	6	6	0	0	0	0
PA 17:0;0-17:1;0	PA	GPL	MEM	34	1	1	0	0.486933	0.532184	0.914321
PA 17:0;0-18:0;0	PA	GPL	MEM	35	0	0	0	0	0	0
PA 17:0;0-18:1;0	PA	GPL	MEM	35	1	1	0	0	0	0
PA 17:0;0-18:2;0	PA	GPL	MEM	35	2	2	0	0	0	0
PA 17:0;0-18:3;0	PA	GPL	MEM	35	3	3	0	0	0	0
PA 17:0;0-20:1;0	PA	GPL	MEM	37	1	1	0	0	0	0
PA 17:0;0-20:2;0	PA	GPL	MEM	37	2	2	0	0	0	0
PA 17:0;0-20:3;0	PA	GPL	MEM	37	3	3	0	0	0	0
PA 17:0;0-20:4;0	PA	GPL	MEM	37	4	4	0	0	0	0
PA 17:0;0-22:4;0	PA	GPL	MEM	39	4	4	0	0	0	0
PA 17:0;0-22:5;0	PA	GPL	MEM	39	5	5	0	0	0	0
PA 17:1;0-17:1;0	PA	GPL	MEM	34	2	2	0	0	0	0
PA 17:1;0-18:0;0	PA	GPL	MEM	35	1	1	0	0	0	0
PA 17:1;0-18:1;0	PA	GPL	MEM	35	2	2	0	0	0	0
PA 17:1;0-18:2;0	PA	GPL	MEM	35	3	3	0	0	0	0
PA 18:0;0-18:0;0	PA	GPL	MEM	36	0	0	0	0	0	0
PA 18:0;0-18:1;0	PA	GPL	MEM	36	1	1	0	7.35005	6.80145	6.98915
PA 18:0;0-18:2;0	PA	GPL	MEM	36	2	2	0	3.19694	2.47401	3.38609
PA 18:0;0-18:3;0	PA	GPL	MEM	36	3	3	0	0	0	0
PA 18:0;0-20:1;0	PA	GPL	MEM	38	1	1	0	0	0	0
PA 18:0;0-20:2;0	PA	GPL	MEM	38	2	2	0	0	0	0
PA 18:0;0-20:3;0	PA	GPL	MEM	38	3	3	0	0	0	0
PA 18:0;0-20:4;0	PA	GPL	MEM	38	4	4	0	0	0	0
PA 18:0;0-20:5;0	PA	GPL	MEM	38	5	5	0	0	0	0
PA 18:0;0-22:4;0	PA	GPL	MEM	40	4	4	0	0	0	0
PA 18:0;0-22:5;0	PA	GPL	MEM	40	5	5	0	0	0	0
PA 18:0;0-22:6;0	PA	GPL	MEM	40	6	6	0	0	0	0
PA 18:1;0-18:1;0	PA	GPL	MEM	36	2	2	0	4.94051	3.85794	5.90128
PA 18:1;0-18:2;0	PA	GPL	MEM	36	3	3	0	0	0	0
PA 18:1;0-18:3;0	PA	GPL	MEM	36	4	4	0	0	0	0
PA 18:1;0-19:0;0	PA	GPL	MEM	37	1	1	0	0	0	0
PA 18:1;0-19:1;0	PA	GPL	MEM	37	2	2	0	0	0	0
PA 18:1;0-20:0;0	PA	GPL	MEM	38	1	1	0	0	0	0
PA 18:1;0-20:1;0	PA	GPL	MEM	38	2	2	0	0	0	0
PA 18:1;0-20:2;0	PA	GPL	MEM	38	3	3	0	0	0	0
PA 18:1;0-20:3;0	PA	GPL	MEM	38	4	4	0	0	0	0
PA 18:1;0-20:4;0	PA	GPL	MEM	38	5	5	0	0	0	0
PA 18:1;0-20:5;0	PA	GPL	MEM	38	6	6	0	0	0	0
PA 18:1;0-22:4;0	PA	GPL	MEM	40	5	5	0	0	0	0
PA 18:1;0-22:5;0	PA	GPL	MEM	40	6	6	0	0	0	0
PA 18:1;0-22:6;0	PA	GPL	MEM	40	7	7	0	0	0	0
PA 18:1;0-24:4;0	PA	GPL	MEM	42	5	5	0	0	0	0
PA 18:2;0-18:2;0	PA	GPL	MEM	36	4	4	0	0	0	0
PA 18:2;0-19:0;0	PA	GPL	MEM	37	2	2	0	0	0	0
PA 18:2;0-19:1;0	PA	GPL	MEM	37	3	3	0	0	0	0
PA 18:2;0-20:0;0	PA	GPL	MEM	38	2	2	0	0	0	0
PA 18:2;0-20:1;0	PA	GPL	MEM	38	3	3	0	0	0	0
PA 18:2;0-20:2;0	PA	GPL	MEM	38	4	4	0	0	0	0
PA 18:2;0-20:3;0	PA	GPL	MEM	38	5	5	0	0	0	0
PA 18:2;0-20:4;0	PA	GPL	MEM	38	6	6	0	0	0	0
PA 18:2;0-20:5;0	PA	GPL	MEM	38	7	7	0	0	0	0
PA 18:2;0-22:4;0	PA	GPL	MEM	40	6	6	0	0	0	0
PA 18:2;0-22:5;0	PA	GPL	MEM	40	7	7	0	0	0	0
PA 18:3;0-20:4;0	PA	GPL	MEM	38	7	7	0	0	0	0
PA 19:0;0-20:3;0	PA	GPL	MEM	39	3	3	0	0	0	0
PA 19:0;0-20:4;0	PA	GPL	MEM	39	4	4	0	0	0	0
PA 19:0;0-22:4;0	PA	GPL	MEM	41	4	4	0	0	0	0
PA 19:0;0-22:6;0	PA	GPL	MEM	41	6	6	0	0	0	0
PA 19:1;0-20:4;0	PA	GPL	MEM	39	5	5	0	0	0	0
PA 20:0;0-20:4;0	PA	GPL	MEM	40	4	4	0	0	0	0
PA 20:0;0-22:4;0	PA	GPL	MEM	42	4	4	0	0	0	0
PA 20:0;0-22:5;0	PA	GPL	MEM	42	5	5	0	0	0	0
PA 20:1;0-20:4;0	PA	GPL	MEM	40	5	5	0	0	0	0
PA 20:1;0-22:4;0	PA	GPL	MEM	42	5	5	0	0	0	0
PA 20:2;0-20:4;0	PA	GPL	MEM	40	6	6	0	0	0	0
PA 20:2;0-22:4;0	PA	GPL	MEM	42	6	6	0	0	0	0
PA 20:3;0-20:3;0	PA	GPL	MEM	40	6	6	0	0	0	0
PA 20:3;0-20:4;0	PA	GPL	MEM	40	7	7	0	0	0	0
PA 20:3;0-22:4;0	PA	GPL	MEM	42	7	7	0	0	0	0
PA 20:4;0-20:4;0	PA	GPL	MEM	40	8	8	0	0	0	0
PA 20:4;0-22:0;0	PA	GPL	MEM	42	4	4	0	0	0	0
PA 20:4;0-22:1;0	PA	GPL	MEM	42	5	5	0	0	0	0
PA 20:4;0-22:4;0	PA	GPL	MEM	42	8	8	0	0	0	0
PA 20:4;0-22:5;0	PA	GPL	MEM	42	9	9	0	0	0	0
PA 20:4;0-22:6;0	PA	GPL	MEM	42	10	10	0	0	0	0
PC 12:0;0-16:0;0	PC	GPL	MEM	28	0	0	0	0	0	0
PC 12:0;0-18:0;0	PC	GPL	MEM	30	0	0	0	0	0	0
PC 12:1;0-16:0;0	PC	GPL	MEM	28	1	1	0	0	0	0
PC 14:0;0-14:0;0	PC	GPL	MEM	28	0	0	0	0	0	0
PC 14:0;0-16:0;0	PC	GPL	MEM	30	0	0	0	2.56023	2.35561	2.14808
PC 14:0;0-17:0;0	PC	GPL	MEM	31	0	0	0	0	0	0
PC 14:0;0-17:1;0	PC	GPL	MEM	31	1	1	0	0	0	0
PC 14:0;0-18:0;0	PC	GPL	MEM	32	0	0	0	0	0.606478	0.527172
PC 14:0;0-18:1;0	PC	GPL	MEM	32	1	1	0	6.1927	6.12337	6.74075
PC 14:0;0-18:2;0	PC	GPL	MEM	32	2	2	0	0	0	0
PC 14:0;0-19:1;0	PC	GPL	MEM	33	1	1	0	0	0	0
PC 14:0;0-20:1;0	PC	GPL	MEM	34	1	1	0	0	0	0
PC 14:0;0-20:2;0	PC	GPL	MEM	34	2	2	0	0	0	0
PC 14:0;0-20:3;0	PC	GPL	MEM	34	3	3	0	0	0	0
PC 14:0;0-20:4;0	PC	GPL	MEM	34	4	4	0	0	0	0
PC 14:0;0-22:4;0	PC	GPL	MEM	36	4	4	0	0	0	0
PC 14:1;0-14:1;0	PC	GPL	MEM	28	2	2	0	0	0	0
PC 14:1;0-17:0;0	PC	GPL	MEM	31	1	1	0	0	0	0
PC 14:1;0-18:0;0	PC	GPL	MEM	32	1	1	0	0	0	0
PC 14:1;0-18:1;0	PC	GPL	MEM	32	2	2	0	0	0	0
PC 15:0;0-15:0;0	PC	GPL	MEM	30	0	0	0	0	0	0.0860573
PC 15:0;0-16:0;0	PC	GPL	MEM	31	0	0	0	0	0.8155	0
PC 15:0;0-16:1;0	PC	GPL	MEM	31	1	1	0	0	0	0
PC 15:0;0-17:0;0	PC	GPL	MEM	32	0	0	0	0.328111	0.298867	0
PC 15:0;0-17:1;0	PC	GPL	MEM	32	1	1	0	1.01681	0.848198	0.812535
PC 15:0;0-18:0;0	PC	GPL	MEM	33	0	0	0	0	0	0
PC 15:0;0-18:1;0	PC	GPL	MEM	33	1	1	0	4.86113	4.47548	4.63837
PC 15:0;0-18:2;0	PC	GPL	MEM	33	2	2	0	0	0	0
PC 15:0;0-19:1;0	PC	GPL	MEM	34	1	1	0	0	0	0
PC 15:0;0-20:1;0	PC	GPL	MEM	35	1	1	0	0	0	0
PC 15:0;0-20:2;0	PC	GPL	MEM	35	2	2	0	0	0	0
PC 15:0;0-20:4;0	PC	GPL	MEM	35	4	4	0	0	0	0
PC 15:0;0-21:1;0	PC	GPL	MEM	36	1	1	0	0	0	0
PC 15:0;0-22:6;0	PC	GPL	MEM	37	6	6	0	0	0	0
PC 15:1;0-16:0;0	PC	GPL	MEM	31	1	1	0	0	0	0
PC 15:1;0-18:0;0	PC	GPL	MEM	33	1	1	0	0	0	0
PC 16:0;0-16:0;0	PC	GPL	MEM	32	0	0	0	7.02283	5.97792	6.72406
PC 16:0;0-16:1;0	PC	GPL	MEM	32	1	1	0	39.9779	39.8952	44.8066
PC 16:0;0-16:2;0	PC	GPL	MEM	32	2	2	0	11.5858	8.63146	0
PC 16:0;0-17:0;0	PC	GPL	MEM	33	0	0	0	0	0	0
PC 16:0;0-17:1;0	PC	GPL	MEM	33	1	1	0	11.8472	10.5066	12.103
PC 16:0;0-17:2;0	PC	GPL	MEM	33	2	2	0	0	0	0
PC 16:0;0-18:0;0	PC	GPL	MEM	34	0	0	0	0	0	0
PC 16:0;0-18:1;0	PC	GPL	MEM	34	1	1	0	249.427	245.182	272.62
PC 16:0;0-18:2;0	PC	GPL	MEM	34	2	2	0	13.6905	12.9854	14.2923
PC 16:0;0-18:3;0	PC	GPL	MEM	34	3	3	0	1.12616	0.780138	1.04968
PC 16:0;0-19:0;0	PC	GPL	MEM	35	0	0	0	0	0	0
PC 16:0;0-19:1;0	PC	GPL	MEM	35	1	1	0	0	1.16667	0.989941
PC 16:0;0-19:2;0	PC	GPL	MEM	35	2	2	0	1.44117	0	0.59446
PC 16:0;0-19:3;0	PC	GPL	MEM	35	3	3	0	0	0	0
PC 16:0;0-20:0;0	PC	GPL	MEM	36	0	0	0	0	0	0
PC 16:0;0-20:1;0	PC	GPL	MEM	36	1	1	0	4.28138	4.66244	5.00936
PC 16:0;0-20:2;0	PC	GPL	MEM	36	2	2	0	9.53387	10.0712	10.3617
PC 16:0;0-20:3;0	PC	GPL	MEM	36	3	3	0	3.84576	3.43923	4.20403
PC 16:0;0-20:4;0	PC	GPL	MEM	36	4	4	0	2.4127	2.77893	3.79106
PC 16:0;0-20:5;0	PC	GPL	MEM	36	5	5	0	0	0	0
PC 16:0;0-21:2;0	PC	GPL	MEM	37	2	2	0	0	0	0
PC 16:0;0-21:3;0	PC	GPL	MEM	37	3	3	0	0	0	0
PC 16:0;0-22:1;0	PC	GPL	MEM	38	1	1	0	0	0	0
PC 16:0;0-22:2;0	PC	GPL	MEM	38	2	2	0	0	0	0
PC 16:0;0-22:3;0	PC	GPL	MEM	38	3	3	0	0	0	0
PC 16:0;0-22:4;0	PC	GPL	MEM	38	4	4	0	0	0	0
PC 16:0;0-22:5;0	PC	GPL	MEM	38	5	5	0	0	0	0
PC 16:0;0-22:6;0	PC	GPL	MEM	38	6	6	0	0	0	0
PC 16:0;0-24:4;0	PC	GPL	MEM	40	4	4	0	0	0	0
PC 16:0;0-24:5;0	PC	GPL	MEM	40	5	5	0	0	0	0
PC 16:1;0-16:1;0	PC	GPL	MEM	32	2	2	0	44.1462	39.0722	39.3489
PC 16:1;0-16:2;0	PC	GPL	MEM	32	3	3	0	0	0	0
PC 16:1;0-17:0;0	PC	GPL	MEM	33	1	1	0	1.09888	1.2718	1.1288
PC 16:1;0-17:1;0	PC	GPL	MEM	33	2	2	0	7.14273	6.22209	5.54962
PC 16:1;0-18:0;0	PC	GPL	MEM	34	1	1	0	9.56081	9.11446	9.55514
PC 16:1;0-18:1;0	PC	GPL	MEM	34	2	2	0	66.3943	63.9365	75.2251
PC 16:1;0-18:2;0	PC	GPL	MEM	34	3	3	0	5.74919	4.81568	5.47457
PC 16:1;0-18:3;0	PC	GPL	MEM	34	4	4	0	0	0	0
PC 16:1;0-19:1;0	PC	GPL	MEM	35	2	2	0	0	0	0
PC 16:1;0-20:1;0	PC	GPL	MEM	36	2	2	0	3.09191	2.64394	2.76079
PC 16:1;0-20:2;0	PC	GPL	MEM	36	3	3	0	2.72957	2.58122	3.0696
PC 16:1;0-20:3;0	PC	GPL	MEM	36	4	4	0	0.799132	0	0.844042
PC 16:1;0-20:4;0	PC	GPL	MEM	36	5	5	0	0	0	0
PC 16:1;0-22:4;0	PC	GPL	MEM	38	5	5	0	0	0	0
PC 16:2;0-18:0;0	PC	GPL	MEM	34	2	2	0	0	1.05476	0
PC 16:2;0-18:1;0	PC	GPL	MEM	34	3	3	0	4.64647	4.9697	3.89464
PC 17:0;0-17:1;0	PC	GPL	MEM	34	1	1	0	1.61395	2.00408	2.0475
PC 17:0;0-18:0;0	PC	GPL	MEM	35	0	0	0	0	0	0
PC 17:0;0-18:1;0	PC	GPL	MEM	35	1	1	0	15.7428	14.4786	12.7136
PC 17:0;0-18:2;0	PC	GPL	MEM	35	2	2	0	0	0	0.691785
PC 17:0;0-20:1;0	PC	GPL	MEM	37	1	1	0	0.261355	1.01297	0
PC 17:0;0-20:2;0	PC	GPL	MEM	37	2	2	0	0	0	0
PC 17:0;0-20:3;0	PC	GPL	MEM	37	3	3	0	0	0	0.766094
PC 17:0;0-20:4;0	PC	GPL	MEM	37	4	4	0	0	0	0
PC 17:0;0-22:4;0	PC	GPL	MEM	39	4	4	0	0	0	0
PC 17:0;0-22:6;0	PC	GPL	MEM	39	6	6	0	0	0	0
PC 17:1;0-17:1;0	PC	GPL	MEM	34	2	2	0	1.34975	1.461	1.57839
PC 17:1;0-18:0;0	PC	GPL	MEM	35	1	1	0	0	0	0
PC 17:1;0-18:1;0	PC	GPL	MEM	35	2	2	0	24.2556	23.5329	18.4048
PC 17:1;0-18:2;0	PC	GPL	MEM	35	3	3	0	3.79189	0	0
PC 17:1;0-20:0;0	PC	GPL	MEM	37	1	1	0	0	0	0
PC 17:1;0-20:1;0	PC	GPL	MEM	37	2	2	0	1.33506	0	0
PC 17:1;0-20:2;0	PC	GPL	MEM	37	3	3	0	0	0	0
PC 17:1;0-20:3;0	PC	GPL	MEM	37	4	4	0	0	0	0
PC 17:1;0-20:4;0	PC	GPL	MEM	37	5	5	0	0	0	0
PC 17:1;0-22:5;0	PC	GPL	MEM	39	6	6	0	0	0	0
PC 17:1;0-22:6;0	PC	GPL	MEM	39	7	7	0	0	0	0
PC 18:0;0-18:0;0	PC	GPL	MEM	36	0	0	0	0	0	0
PC 18:0;0-18:1;0	PC	GPL	MEM	36	1	1	0	39.5606	38.2134	42.4037
PC 18:0;0-18:2;0	PC	GPL	MEM	36	2	2	0	3.86879	3.2697	3.82236
PC 18:0;0-18:3;0	PC	GPL	MEM	36	3	3	0	0	0	0
PC 18:0;0-19:1;0	PC	GPL	MEM	37	1	1	0	0.0718636	0	0
PC 18:0;0-19:2;0	PC	GPL	MEM	37	2	2	0	0	0	0
PC 18:0;0-19:3;0	PC	GPL	MEM	37	3	3	0	0	0	0
PC 18:0;0-20:1;0	PC	GPL	MEM	38	1	1	0	1.36369	1.15205	0.860227
PC 18:0;0-20:2;0	PC	GPL	MEM	38	2	2	0	2.88524	2.51892	0
PC 18:0;0-20:3;0	PC	GPL	MEM	38	3	3	0	0	1.32585	1.72871
PC 18:0;0-20:4;0	PC	GPL	MEM	38	4	4	0	0	0	0.625552
PC 18:0;0-22:4;0	PC	GPL	MEM	40	4	4	0	0	0	0
PC 18:0;0-22:5;0	PC	GPL	MEM	40	5	5	0	0	0	0
PC 18:0;0-22:6;0	PC	GPL	MEM	40	6	6	0	0	0	0
PC 18:0;0-24:0;0	PC	GPL	MEM	42	0	0	0	0	0	0
PC 18:1;0-18:1;0	PC	GPL	MEM	36	2	2	0	199.146	194.238	221.419
PC 18:1;0-18:2;0	PC	GPL	MEM	36	3	3	0	16.1754	16.5325	17.8167
PC 18:1;0-18:3;0	PC	GPL	MEM	36	4	4	0	1.48064	1.03833	0
PC 18:1;0-19:0;0	PC	GPL	MEM	37	1	1	0	0.697956	0	0
PC 18:1;0-19:1;0	PC	GPL	MEM	37	2	2	0	3.80172	5.25827	4.2228
PC 18:1;0-19:2;0	PC	GPL	MEM	37	3	3	0	7.6521	7.38245	1.87322
PC 18:1;0-19:3;0	PC	GPL	MEM	37	4	4	0	0	0	0
PC 18:1;0-19:5;0	PC	GPL	MEM	37	6	6	0	0	0	0
PC 18:1;0-20:0;0	PC	GPL	MEM	38	1	1	0	0	0	0.664569
PC 18:1;0-20:1;0	PC	GPL	MEM	38	2	2	0	10.3757	10.6004	14.7817
PC 18:1;0-20:2;0	PC	GPL	MEM	38	3	3	0	16.8834	14.8557	16.3769
PC 18:1;0-20:3;0	PC	GPL	MEM	38	4	4	0	5.34255	4.67121	4.29884
PC 18:1;0-20:4;0	PC	GPL	MEM	38	5	5	0	3.73799	3.45639	3.87932
PC 18:1;0-20:5;0	PC	GPL	MEM	38	6	6	0	0	0	0
PC 18:1;0-22:1;0	PC	GPL	MEM	40	2	2	0	1.29131	1.18591	0
PC 18:1;0-22:4;0	PC	GPL	MEM	40	5	5	0	0	0	0
PC 18:1;0-22:5;0	PC	GPL	MEM	40	6	6	0	0	0	1.37655
PC 18:1;0-22:6;0	PC	GPL	MEM	40	7	7	0	0	0	0
PC 18:1;0-24:0;0	PC	GPL	MEM	42	1	1	0	0	0	0
PC 18:1;0-24:1;0	PC	GPL	MEM	42	2	2	0	0	0	0
PC 18:1;0-24:4;0	PC	GPL	MEM	42	5	5	0	0	0	0
PC 18:2;0-18:2;0	PC	GPL	MEM	36	4	4	0	0.397704	0.540209	0.498257
PC 18:2;0-20:1;0	PC	GPL	MEM	38	3	3	0	0.589976	0	0.513673
PC 18:2;0-20:2;0	PC	GPL	MEM	38	4	4	0	0	0.712749	0.650682
PC 18:2;0-20:3;0	PC	GPL	MEM	38	5	5	0	0	0	0
PC 18:2;0-20:4;0	PC	GPL	MEM	38	6	6	0	0	0	0
PC 20:1;0-20:1;0	PC	GPL	MEM	40	2	2	0	0	0	0
PC 20:1;0-20:3;0	PC	GPL	MEM	40	4	4	0	0	0	0
PC 20:1;0-20:4;0	PC	GPL	MEM	40	5	5	0	0	0	0
PC 20:2;0-20:4;0	PC	GPL	MEM	40	6	6	0	0	0	0
PC 20:3;0-20:4;0	PC	GPL	MEM	40	7	7	0	0	0	0
PC 20:4;0-20:4;0	PC	GPL	MEM	40	8	8	0	0	0	0
PC O- 16:0;0-16:0;0	PC O-	GPL	MEM	32	0	0	0	1.14053	0.91555	0.792408
PC O- 16:0;0-16:1;0	PC O-	GPL	MEM	32	1	0	0	4.22753	3.45905	4.05622
PC O- 16:0;0-16:2;0	PC O-	GPL	MEM	32	2	1	0	0	0.278166	0
PC O- 16:0;0-17:0;0	PC O-	GPL	MEM	33	0	0	0	0	0	0
PC O- 16:0;0-17:1;0	PC O-	GPL	MEM	33	1	0	0	0.0347865	0.0329573	0.0430015
PC O- 16:0;0-18:0;0	PC O-	GPL	MEM	34	0	0	0	0	0.0170259	0
PC O- 16:0;0-18:1;0	PC O-	GPL	MEM	34	1	0	0	14.2142	13.797	15.2323
PC O- 16:0;0-18:2;0	PC O-	GPL	MEM	34	2	1	0	1.09178	0.836189	1.18567
PC O- 16:0;0-18:3;0	PC O-	GPL	MEM	34	3	2	0	0	0	0
PC O- 16:0;0-19:1;0	PC O-	GPL	MEM	35	1	0	0	0	0	0
PC O- 16:0;0-20:1;0	PC O-	GPL	MEM	36	1	0	0	0.500634	0.432046	0.55632
PC O- 16:0;0-20:2;0	PC O-	GPL	MEM	36	2	1	0	1.00385	1.44082	1.31638
PC O- 16:0;0-20:3;0	PC O-	GPL	MEM	36	3	2	0	0.754287	0.664984	0.701621
PC O- 16:0;0-20:4;0	PC O-	GPL	MEM	36	4	3	0	0.51254	2.38545	0
PC O- 16:0;0-20:5;0	PC O-	GPL	MEM	36	5	4	0	0	0	0.957384
PC O- 16:0;0-22:1;0	PC O-	GPL	MEM	38	1	0	0	0	0	0
PC O- 16:0;0-22:2;0	PC O-	GPL	MEM	38	2	1	0	0	0	0
PC O- 16:0;0-22:3;0	PC O-	GPL	MEM	38	3	2	0	0	0	0
PC O- 16:0;0-22:4;0	PC O-	GPL	MEM	38	4	3	0	0	0	0
PC O- 16:0;0-22:5;0	PC O-	GPL	MEM	38	5	4	0	0	0	0
PC O- 16:0;0-22:6;0	PC O-	GPL	MEM	38	6	5	0	0	0	0
PC O- 16:0;0-24:4;0	PC O-	GPL	MEM	40	4	3	0	0	0	0
PC O- 16:0;0-24:5;0	PC O-	GPL	MEM	40	5	4	0	0	0	0
PC O- 16:1;0-16:0;0	PC O-	GPL	MEM	32	1	0	0	2.09439	2.12574	2.11434
PC O- 16:1;0-16:1;0	PC O-	GPL	MEM	32	2	1	0	2.0199	1.85912	2.3084
PC O- 16:1;0-17:0;0	PC O-	GPL	MEM	33	1	0	0	0	0	0
PC O- 16:1;0-17:1;0	PC O-	GPL	MEM	33	2	1	0	0	0	0
PC O- 16:1;0-18:0;0	PC O-	GPL	MEM	34	1	0	0	0.254533	0	0
PC O- 16:1;0-18:1;0	PC O-	GPL	MEM	34	2	1	0	3.66309	3.84659	4.10042
PC O- 16:1;0-18:2;0	PC O-	GPL	MEM	34	3	2	0	0	0.15459	0
PC O- 16:1;0-20:0;0	PC O-	GPL	MEM	36	1	0	0	0	0	0
PC O- 16:1;0-20:1;0	PC O-	GPL	MEM	36	2	1	0	0	0	0.148018
PC O- 16:1;0-20:2;0	PC O-	GPL	MEM	36	3	2	0	0.291925	0.414471	0.193578
PC O- 16:1;0-20:3;0	PC O-	GPL	MEM	36	4	3	0	0.608202	0	1.60498
PC O- 16:1;0-20:4;0	PC O-	GPL	MEM	36	5	4	0	0	0	0
PC O- 16:1;0-22:1;0	PC O-	GPL	MEM	38	2	1	0	0	0	0
PC O- 16:1;0-22:4;0	PC O-	GPL	MEM	38	5	4	0	0	0	0
PC O- 16:1;0-22:5;0	PC O-	GPL	MEM	38	6	5	0	0	0	0
PC O- 16:1;0-22:6;0	PC O-	GPL	MEM	38	7	6	0	0	0	0
PC O- 16:1;0-24:0;0	PC O-	GPL	MEM	40	1	0	0	0	0	0
PC O- 16:2;0-16:0;0	PC O-	GPL	MEM	32	2	1	0	0.328368	0	0
PC O- 16:2;0-16:1;0	PC O-	GPL	MEM	32	3	2	0	0	0	0
PC O- 16:2;0-17:0;0	PC O-	GPL	MEM	33	2	1	0	0	0	0
PC O- 16:2;0-18:0;0	PC O-	GPL	MEM	34	2	1	0	0	0.293193	0.470213
PC O- 16:2;0-18:1;0	PC O-	GPL	MEM	34	3	2	0	1.51944	0.914497	1.42573
PC O- 16:2;0-18:2;0	PC O-	GPL	MEM	34	4	3	0	0	0	0
PC O- 16:2;0-20:2;0	PC O-	GPL	MEM	36	4	3	0	0	0	0
PC O- 16:2;0-20:3;0	PC O-	GPL	MEM	36	5	4	0	0	0	0
PC O- 17:0;0-15:0;0	PC O-	GPL	MEM	32	0	0	0	0.141922	0.123084	0.145377
PC O- 17:0;0-15:1;0	PC O-	GPL	MEM	32	1	0	0	0	0	0
PC O- 17:0;0-16:0;0	PC O-	GPL	MEM	33	0	0	0	0	0	0
PC O- 17:0;0-16:1;0	PC O-	GPL	MEM	33	1	0	0	2.47571	2.04973	2.55009
PC O- 17:0;0-16:2;0	PC O-	GPL	MEM	33	2	1	0	0.125846	0.154924	0.0957246
PC O- 17:0;0-17:0;0	PC O-	GPL	MEM	34	0	0	0	0.218285	0.282884	0.306176
PC O- 17:0;0-17:1;0	PC O-	GPL	MEM	34	1	0	0	3.2198	3.68512	4.01949
PC O- 17:0;0-17:2;0	PC O-	GPL	MEM	34	2	1	0	0	0	0
PC O- 17:0;0-18:1;0	PC O-	GPL	MEM	35	1	0	0	2.73185	2.88058	3.53735
PC O- 17:0;0-18:2;0	PC O-	GPL	MEM	35	2	1	0	0.808944	0.830154	0.680011
PC O- 17:0;0-18:3;0	PC O-	GPL	MEM	35	3	2	0	0.133971	0.0823963	0
PC O- 17:0;0-19:0;0	PC O-	GPL	MEM	36	0	0	0	0	0	0
PC O- 17:0;0-19:1;0	PC O-	GPL	MEM	36	1	0	0	0	0.158283	0.201525
PC O- 17:0;0-19:2;0	PC O-	GPL	MEM	36	2	1	0	0.261609	0	0.306514
PC O- 17:0;0-19:3;0	PC O-	GPL	MEM	36	3	2	0	0	0	0
PC O- 17:0;0-20:1;0	PC O-	GPL	MEM	37	1	0	0	0	0	0
PC O- 17:0;0-20:2;0	PC O-	GPL	MEM	37	2	1	0	0	0	0
PC O- 17:0;0-20:3;0	PC O-	GPL	MEM	37	3	2	0	0.975766	0.775139	0
PC O- 17:0;0-20:4;0	PC O-	GPL	MEM	37	4	3	0	0	0	0
PC O- 17:0;0-20:5;0	PC O-	GPL	MEM	37	5	4	0	0	0	0
PC O- 17:0;0-22:5;0	PC O-	GPL	MEM	39	5	4	0	0	0	0
PC O- 17:0;0-22:6;0	PC O-	GPL	MEM	39	6	5	0	0	0	0
PC O- 17:1;0-15:0;0	PC O-	GPL	MEM	32	1	0	0	0	0	0
PC O- 17:1;0-16:0;0	PC O-	GPL	MEM	33	1	0	0	1.60097	1.34007	1.51458
PC O- 17:1;0-16:1;0	PC O-	GPL	MEM	33	2	1	0	1.02831	0.980731	1.2079
PC O- 17:1;0-17:0;0	PC O-	GPL	MEM	34	1	0	0	0.31932	0.429887	0.393834
PC O- 17:1;0-17:1;0	PC O-	GPL	MEM	34	2	1	0	0.434757	0.818846	1.0574
PC O- 17:1;0-18:0;0	PC O-	GPL	MEM	35	1	0	0	0.0457939	0.04531	0.0472645
PC O- 17:1;0-18:1;0	PC O-	GPL	MEM	35	2	1	0	3.32776	3.72648	2.93193
PC O- 17:1;0-18:2;0	PC O-	GPL	MEM	35	3	2	0	0.581368	0.379384	0
PC O- 17:1;0-19:1;0	PC O-	GPL	MEM	36	2	1	0	0	0	0
PC O- 17:1;0-20:1;0	PC O-	GPL	MEM	37	2	1	0	0	0	0
PC O- 17:1;0-20:2;0	PC O-	GPL	MEM	37	3	2	0	0.509454	0.545528	0
PC O- 17:1;0-20:3;0	PC O-	GPL	MEM	37	4	3	0	0	0	0
PC O- 17:1;0-20:4;0	PC O-	GPL	MEM	37	5	4	0	0	0	0
PC O- 17:2;0-16:0;0	PC O-	GPL	MEM	33	2	1	0	0.144025	0.0617302	0
PC O- 17:2;0-17:0;0	PC O-	GPL	MEM	34	2	1	0	0	0	0
PC O- 17:2;0-18:0;0	PC O-	GPL	MEM	35	2	1	0	0.0961064	0.0924651	0.0302375
PC O- 17:2;0-18:1;0	PC O-	GPL	MEM	35	3	2	0	0.716498	0.621513	0
PC O- 18:0;0-14:0;0	PC O-	GPL	MEM	32	0	0	0	0.920241	0.978052	1.03267
PC O- 18:0;0-14:1;0	PC O-	GPL	MEM	32	1	0	0	0	0	0
PC O- 18:0;0-15:0;0	PC O-	GPL	MEM	33	0	0	0	0	0	0
PC O- 18:0;0-16:0;0	PC O-	GPL	MEM	34	0	0	0	0.712253	0.963935	0.907471
PC O- 18:0;0-16:1;0	PC O-	GPL	MEM	34	1	0	0	3.11312	3.7433	3.53507
PC O- 18:0;0-17:1;0	PC O-	GPL	MEM	35	1	0	0	0.00489883	0.0142612	0.00805572
PC O- 18:0;0-18:0;0	PC O-	GPL	MEM	36	0	0	0	0	0	0
PC O- 18:0;0-18:1;0	PC O-	GPL	MEM	36	1	0	0	8.64972	7.48544	8.50032
PC O- 18:0;0-18:2;0	PC O-	GPL	MEM	36	2	1	0	0.845559	0.837201	1.10572
PC O- 18:0;0-18:3;0	PC O-	GPL	MEM	36	3	2	0	0	0	0
PC O- 18:0;0-19:1;0	PC O-	GPL	MEM	37	1	0	0	0	0	0
PC O- 18:0;0-20:0;0	PC O-	GPL	MEM	38	0	0	0	0	0	0
PC O- 18:0;0-20:1;0	PC O-	GPL	MEM	38	1	0	0	1.32623	1.35807	1.54823
PC O- 18:0;0-20:2;0	PC O-	GPL	MEM	38	2	1	0	1.25457	0.849806	1.19707
PC O- 18:0;0-20:3;0	PC O-	GPL	MEM	38	3	2	0	1.0858	0.781198	0.897767
PC O- 18:0;0-20:4;0	PC O-	GPL	MEM	38	4	3	0	0.636071	0.666647	0.527938
PC O- 18:0;0-20:6;0	PC O-	GPL	MEM	38	6	5	0	0	0	0
PC O- 18:0;0-22:1;0	PC O-	GPL	MEM	40	1	0	0	1.20916	1.32108	0
PC O- 18:0;0-22:4;0	PC O-	GPL	MEM	40	4	3	0	0	0	0
PC O- 18:0;0-22:5;0	PC O-	GPL	MEM	40	5	4	0	0	0	0
PC O- 18:0;0-22:6;0	PC O-	GPL	MEM	40	6	5	0	0	0	0
PC O- 18:1;0-14:0;0	PC O-	GPL	MEM	32	1	0	0	1.43376	1.46769	1.89732
PC O- 18:1;0-15:0;0	PC O-	GPL	MEM	33	1	0	0	0.0689016	0.039112	0.0307084
PC O- 18:1;0-16:0;0	PC O-	GPL	MEM	34	1	0	0	33.7859	30.7905	38.1059
PC O- 18:1;0-16:1;0	PC O-	GPL	MEM	34	2	1	0	9.08475	8.31867	9.45052
PC O- 18:1;0-16:2;0	PC O-	GPL	MEM	34	3	2	0	0	0.165662	0.237098
PC O- 18:1;0-17:0;0	PC O-	GPL	MEM	35	1	0	0	0.0213089	0.0206392	0.0320487
PC O- 18:1;0-17:1;0	PC O-	GPL	MEM	35	2	1	0	0.128128	0.157193	0.116399
PC O- 18:1;0-18:0;0	PC O-	GPL	MEM	36	1	0	0	0	0	0
PC O- 18:1;0-18:1;0	PC O-	GPL	MEM	36	2	1	0	27.2527	26.624	30.1038
PC O- 18:1;0-18:2;0	PC O-	GPL	MEM	36	3	2	0	2.58594	2.12464	2.86077
PC O- 18:1;0-18:3;0	PC O-	GPL	MEM	36	4	3	0	0.487598	0	0
PC O- 18:1;0-19:2;0	PC O-	GPL	MEM	37	3	2	0	0.0743588	0.13294	0
PC O- 18:1;0-20:0;0	PC O-	GPL	MEM	38	1	0	0	0	0	0
PC O- 18:1;0-20:1;0	PC O-	GPL	MEM	38	2	1	0	1.1645	1.14936	1.1767
PC O- 18:1;0-20:2;0	PC O-	GPL	MEM	38	3	2	0	3.71545	2.99471	3.89446
PC O- 18:1;0-20:3;0	PC O-	GPL	MEM	38	4	3	0	4.00165	3.65721	3.96691
PC O- 18:1;0-20:4;0	PC O-	GPL	MEM	38	5	4	0	4.48387	5.00743	5.06816
PC O- 18:1;0-20:5;0	PC O-	GPL	MEM	38	6	5	0	3.18085	0	0
PC O- 18:1;0-22:4;0	PC O-	GPL	MEM	40	5	4	0	0	0	0
PC O- 18:1;0-22:5;0	PC O-	GPL	MEM	40	6	5	0	1.16393	0	1.42377
PC O- 18:1;0-22:6;0	PC O-	GPL	MEM	40	7	6	0	0	0	0
PC O- 18:2;0-14:0;0	PC O-	GPL	MEM	32	2	1	0	0	0	0
PC O- 18:2;0-15:0;0	PC O-	GPL	MEM	33	2	1	0	0	0	0
PC O- 18:2;0-16:0;0	PC O-	GPL	MEM	34	2	1	0	2.07175	1.83791	2.16293
PC O- 18:2;0-16:1;0	PC O-	GPL	MEM	34	3	2	0	0.508434	0.666857	0.509272
PC O- 18:2;0-17:0;0	PC O-	GPL	MEM	35	2	1	0	0	0	0
PC O- 18:2;0-17:1;0	PC O-	GPL	MEM	35	3	2	0	0	0	0
PC O- 18:2;0-18:0;0	PC O-	GPL	MEM	36	2	1	0	0.289661	0	0.330981
PC O- 18:2;0-18:1;0	PC O-	GPL	MEM	36	3	2	0	3.97652	4.1035	4.11301
PC O- 18:2;0-18:2;0	PC O-	GPL	MEM	36	4	3	0	0.809704	0	0.867824
PC O- 18:2;0-20:1;0	PC O-	GPL	MEM	38	3	2	0	0	0	0
PC O- 18:2;0-20:2;0	PC O-	GPL	MEM	38	4	3	0	0.405064	0	0.427654
PC O- 18:2;0-20:3;0	PC O-	GPL	MEM	38	5	4	0	0.74359	0.633121	0.965666
PC O- 18:2;0-20:4;0	PC O-	GPL	MEM	38	6	5	0	0	0	0
PE 14:0;0-18:0;0	PE	GPL	MEM	32	0	0	0	0	0	0
PE 14:0;0-18:1;0	PE	GPL	MEM	32	1	1	0	0.34831	0	0
PE 14:0;0-18:2;0	PE	GPL	MEM	32	2	2	0	0	0	0
PE 15:0;0-17:1;0	PE	GPL	MEM	32	1	1	0	0	0	0
PE 15:0;0-18:0;0	PE	GPL	MEM	33	0	0	0	0	0	0
PE 15:0;0-18:1;0	PE	GPL	MEM	33	1	1	0	0	0	0
PE 15:0;0-18:2;0	PE	GPL	MEM	33	2	2	0	0	0	0
PE 15:0;0-20:3;0	PE	GPL	MEM	35	3	3	0	0	0	0
PE 15:0;0-22:3;0	PE	GPL	MEM	37	3	3	0	0	0	0
PE 15:0;0-22:4;0	PE	GPL	MEM	37	4	4	0	0	0	0
PE 15:0;0-24:4;0	PE	GPL	MEM	39	4	4	0	0	0	0
PE 15:0;0-24:5;0	PE	GPL	MEM	39	5	5	0	0	0	0
PE 15:1;0-17:1;0	PE	GPL	MEM	32	2	2	0	0	0	0
PE 15:1;0-19:1;0	PE	GPL	MEM	34	2	2	0	0	0	0
PE 15:1;0-24:5;0	PE	GPL	MEM	39	6	6	0	0	0	0
PE 16:0;0-16:0;0	PE	GPL	MEM	32	0	0	0	0	0	0
PE 16:0;0-16:1;0	PE	GPL	MEM	32	1	1	0	1.96878	1.82192	2.01042
PE 16:0;0-17:0;0	PE	GPL	MEM	33	0	0	0	5.46603	0	0
PE 16:0;0-17:1;0	PE	GPL	MEM	33	1	1	0	0	0	0
PE 16:0;0-18:0;0	PE	GPL	MEM	34	0	0	0	0	0	0
PE 16:0;0-18:1;0	PE	GPL	MEM	34	1	1	0	17.1873	14.1591	15.4298
PE 16:0;0-18:2;0	PE	GPL	MEM	34	2	2	0	1.35193	0.862293	1.27459
PE 16:0;0-18:3;0	PE	GPL	MEM	34	3	3	0	0	0	0
PE 16:0;0-19:1;0	PE	GPL	MEM	35	1	1	0	0	0	0
PE 16:0;0-19:2;0	PE	GPL	MEM	35	2	2	0	0	0	0
PE 16:0;0-19:3;0	PE	GPL	MEM	35	3	3	0	0	0	0
PE 16:0;0-20:1;0	PE	GPL	MEM	36	1	1	0	0.987826	0.746259	0.764954
PE 16:0;0-20:2;0	PE	GPL	MEM	36	2	2	0	1.1925	1.17498	1.23258
PE 16:0;0-20:3;0	PE	GPL	MEM	36	3	3	0	0.631556	0.344793	0.725218
PE 16:0;0-20:4;0	PE	GPL	MEM	36	4	4	0	2.43977	0.640057	1.06243
PE 16:0;0-21:3;0	PE	GPL	MEM	37	3	3	0	0	0	0
PE 16:0;0-22:2;0	PE	GPL	MEM	38	2	2	0	0	0	0
PE 16:0;0-22:3;0	PE	GPL	MEM	38	3	3	0	0	0	0
PE 16:0;0-22:4;0	PE	GPL	MEM	38	4	4	0	0	0	0
PE 16:0;0-22:5;0	PE	GPL	MEM	38	5	5	0	0	0	0
PE 16:0;0-22:6;0	PE	GPL	MEM	38	6	6	0	0	0	0
PE 16:1;0-16:1;0	PE	GPL	MEM	32	2	2	0	0.820301	0.473203	0.739801
PE 16:1;0-17:0;0	PE	GPL	MEM	33	1	1	0	0	0	0
PE 16:1;0-17:1;0	PE	GPL	MEM	33	2	2	0	0	0	0
PE 16:1;0-18:0;0	PE	GPL	MEM	34	1	1	0	5.03411	4.44469	4.87608
PE 16:1;0-18:1;0	PE	GPL	MEM	34	2	2	0	15.0616	12.5561	14.7545
PE 16:1;0-18:2;0	PE	GPL	MEM	34	3	3	0	0.287288	0	0.69495
PE 16:1;0-19:1;0	PE	GPL	MEM	35	2	2	0	0	0	0
PE 16:1;0-19:2;0	PE	GPL	MEM	35	3	3	0	0	0	0
PE 16:1;0-20:1;0	PE	GPL	MEM	36	2	2	0	0.923433	0.858641	0.77959
PE 16:1;0-20:2;0	PE	GPL	MEM	36	3	3	0	1.51687	1.31218	1.10289
PE 16:1;0-20:3;0	PE	GPL	MEM	36	4	4	0	0	0.494356	0.475166
PE 16:1;0-20:4;0	PE	GPL	MEM	36	5	5	0	0	0	0.936276
PE 16:1;0-21:3;0	PE	GPL	MEM	37	4	4	0	0	0	0
PE 16:1;0-22:2;0	PE	GPL	MEM	38	3	3	0	0	0	0
PE 16:1;0-22:3;0	PE	GPL	MEM	38	4	4	0	0	0	0
PE 16:1;0-22:4;0	PE	GPL	MEM	38	5	5	0	0	0	0
PE 16:1;0-22:5;0	PE	GPL	MEM	38	6	6	0	0	0	0
PE 16:2;0-18:0;0	PE	GPL	MEM	34	2	2	0	0	0	0
PE 16:2;0-18:1;0	PE	GPL	MEM	34	3	3	0	0.253568	0	0
PE 17:0;0-17:1;0	PE	GPL	MEM	34	1	1	0	0.228513	0	0
PE 17:0;0-18:1;0	PE	GPL	MEM	35	1	1	0	4.36736	3.92283	4.35631
PE 17:0;0-18:2;0	PE	GPL	MEM	35	2	2	0	0	0	0
PE 17:0;0-18:3;0	PE	GPL	MEM	35	3	3	0	0	0	0
PE 17:0;0-19:1;0	PE	GPL	MEM	36	1	1	0	0	0	0
PE 17:0;0-19:3;0	PE	GPL	MEM	36	3	3	0	0	0	0
PE 17:0;0-20:2;0	PE	GPL	MEM	37	2	2	0	0	0	0.577272
PE 17:0;0-20:3;0	PE	GPL	MEM	37	3	3	0	0	0.198429	0
PE 17:0;0-20:4;0	PE	GPL	MEM	37	4	4	0	0	0	0.470271
PE 17:0;0-22:3;0	PE	GPL	MEM	39	3	3	0	0	0	0
PE 17:0;0-22:4;0	PE	GPL	MEM	39	4	4	0	0	0	0
PE 17:0;0-22:5;0	PE	GPL	MEM	39	5	5	0	0	0	0
PE 17:0;0-22:6;0	PE	GPL	MEM	39	6	6	0	0	0	0
PE 17:1;0-17:1;0	PE	GPL	MEM	34	2	2	0	0.304222	0.160538	0.216427
PE 17:1;0-18:0;0	PE	GPL	MEM	35	1	1	0	0	0	0
PE 17:1;0-18:1;0	PE	GPL	MEM	35	2	2	0	5.66235	4.49592	4.63347
PE 17:1;0-18:2;0	PE	GPL	MEM	35	3	3	0	0	0	0
PE 17:1;0-19:1;0	PE	GPL	MEM	36	2	2	0	0.327196	0	0
PE 17:1;0-20:1;0	PE	GPL	MEM	37	2	2	0	0	0	0
PE 17:1;0-20:2;0	PE	GPL	MEM	37	3	3	0	0	0	0
PE 17:1;0-20:3;0	PE	GPL	MEM	37	4	4	0	0	0	0
PE 17:1;0-21:1;0	PE	GPL	MEM	38	2	2	0	0	0	0
PE 17:1;0-22:3;0	PE	GPL	MEM	39	4	4	0	0	0	0
PE 17:1;0-22:5;0	PE	GPL	MEM	39	6	6	0	0	0	0
PE 17:1;0-22:6;0	PE	GPL	MEM	39	7	7	0	0	0	0
PE 17:1;0-24:5;0	PE	GPL	MEM	41	6	6	0	0	0	0
PE 17:1;0-24:6;0	PE	GPL	MEM	41	7	7	0	0	0	0
PE 17:2;0-24:5;0	PE	GPL	MEM	41	7	7	0	0	0	0
PE 18:0;0-18:1;0	PE	GPL	MEM	36	1	1	0	54.0933	45.2831	50.2778
PE 18:0;0-18:2;0	PE	GPL	MEM	36	2	2	0	3.61697	3.41609	3.85339
PE 18:0;0-18:3;0	PE	GPL	MEM	36	3	3	0	0	0	0
PE 18:0;0-19:1;0	PE	GPL	MEM	37	1	1	0	0	0	0
PE 18:0;0-19:2;0	PE	GPL	MEM	37	2	2	0	0	0	0
PE 18:0;0-19:3;0	PE	GPL	MEM	37	3	3	0	0	0	0
PE 18:0;0-20:1;0	PE	GPL	MEM	38	1	1	0	0.745856	0	1.12687
PE 18:0;0-20:2;0	PE	GPL	MEM	38	2	2	0	4.29353	3.75809	3.98875
PE 18:0;0-20:3;0	PE	GPL	MEM	38	3	3	0	2.25459	2.43605	2.48983
PE 18:0;0-20:4;0	PE	GPL	MEM	38	4	4	0	8.60785	7.17097	7.61108
PE 18:0;0-20:5;0	PE	GPL	MEM	38	5	5	0	0	0	1.89612
PE 18:0;0-21:3;0	PE	GPL	MEM	39	3	3	0	0	0	0
PE 18:0;0-22:2;0	PE	GPL	MEM	40	2	2	0	0	0	0
PE 18:0;0-22:3;0	PE	GPL	MEM	40	3	3	0	0	0	0
PE 18:0;0-22:4;0	PE	GPL	MEM	40	4	4	0	0	0	0
PE 18:0;0-22:5;0	PE	GPL	MEM	40	5	5	0	0	0	0
PE 18:0;0-22:6;0	PE	GPL	MEM	40	6	6	0	0	0	0
PE 18:0;0-24:5;0	PE	GPL	MEM	42	5	5	0	0	0	0
PE 18:1;0-18:1;0	PE	GPL	MEM	36	2	2	0	113.708	95.6653	105.218
PE 18:1;0-18:2;0	PE	GPL	MEM	36	3	3	0	8.94161	7.97663	8.86903
PE 18:1;0-18:3;0	PE	GPL	MEM	36	4	4	0	0	0.650028	0.713816
PE 18:1;0-19:0;0	PE	GPL	MEM	37	1	1	0	0	0	0
PE 18:1;0-19:1;0	PE	GPL	MEM	37	2	2	0	2.76346	1.91574	1.67339
PE 18:1;0-19:2;0	PE	GPL	MEM	37	3	3	0	1.12219	0.587567	0.936317
PE 18:1;0-19:3;0	PE	GPL	MEM	37	4	4	0	0	0	0
PE 18:1;0-20:0;0	PE	GPL	MEM	38	1	1	0	0.982189	0	0
PE 18:1;0-20:1;0	PE	GPL	MEM	38	2	2	0	6.64836	5.21454	6.39099
PE 18:1;0-20:2;0	PE	GPL	MEM	38	3	3	0	11.8719	9.1332	11.1221
PE 18:1;0-20:3;0	PE	GPL	MEM	38	4	4	0	7.19938	5.68835	6.86118
PE 18:1;0-20:4;0	PE	GPL	MEM	38	5	5	0	11.302	9.82133	9.20098
PE 18:1;0-20:5;0	PE	GPL	MEM	38	6	6	0	4.49062	3.96169	4.19519
PE 18:1;0-21:2;0	PE	GPL	MEM	39	3	3	0	0	0	0
PE 18:1;0-21:3;0	PE	GPL	MEM	39	4	4	0	0	0	0
PE 18:1;0-22:0;0	PE	GPL	MEM	40	1	1	0	0	0	0
PE 18:1;0-22:1;0	PE	GPL	MEM	40	2	2	0	1.08486	0.948024	1.10233
PE 18:1;0-22:2;0	PE	GPL	MEM	40	3	3	0	1.34095	1.15976	1.31046
PE 18:1;0-22:3;0	PE	GPL	MEM	40	4	4	0	0	0	0
PE 18:1;0-22:4;0	PE	GPL	MEM	40	5	5	0	0	0	0
PE 18:1;0-22:5;0	PE	GPL	MEM	40	6	6	0	0	0	0
PE 18:1;0-22:6;0	PE	GPL	MEM	40	7	7	0	0	0	0
PE 18:1;0-24:0;0	PE	GPL	MEM	42	1	1	0	0	0.464384	0.526468
PE 18:1;0-24:1;0	PE	GPL	MEM	42	2	2	0	0	0	0
PE 18:2;0-18:2;0	PE	GPL	MEM	36	4	4	0	0	0.21126	0.115693
PE 18:2;0-20:1;0	PE	GPL	MEM	38	3	3	0	0	0.335765	0
PE 18:2;0-20:2;0	PE	GPL	MEM	38	4	4	0	0	0	0
PE 18:2;0-20:3;0	PE	GPL	MEM	38	5	5	0	0	0	0
PE 18:2;0-20:4;0	PE	GPL	MEM	38	6	6	0	0	0	0
PE 18:2;0-22:4;0	PE	GPL	MEM	40	6	6	0	0	0	0
PE 19:1;0-20:3;0	PE	GPL	MEM	39	4	4	0	0	0	0
PE 20:1;0-20:1;0	PE	GPL	MEM	40	2	2	0	0	0	0
PE 20:1;0-20:2;0	PE	GPL	MEM	40	3	3	0	0	0	0
PE 20:1;0-20:3;0	PE	GPL	MEM	40	4	4	0	0	0	0
PE 20:1;0-20:4;0	PE	GPL	MEM	40	5	5	0	0	0	0
PE 20:2;0-20:2;0	PE	GPL	MEM	40	4	4	0	0.80806	0.733452	0.661389
PE 20:2;0-20:3;0	PE	GPL	MEM	40	5	5	0	0	0	0
PE 20:2;0-20:4;0	PE	GPL	MEM	40	6	6	0	0	0	0
PE 20:3;0-20:3;0	PE	GPL	MEM	40	6	6	0	0	0	0
PE 20:4;0-20:4;0	PE	GPL	MEM	40	8	8	0	0	0	0
PE 20:4;0-22:4;0	PE	GPL	MEM	42	8	8	0	0	0	0
PE 22:6;0-22:6;0	PE	GPL	MEM	44	12	12	0	0	0	0
PE O- 16:0;0-16:0;0	PE O-	GPL	MEM	32	0	0	0	0	0	0
PE O- 16:0;0-16:1;0	PE O-	GPL	MEM	32	1	0	0	0	0	0
PE O- 16:0;0-17:1;0	PE O-	GPL	MEM	33	1	0	0	0	0	0
PE O- 16:0;0-18:0;0	PE O-	GPL	MEM	34	0	0	0	0	0	0
PE O- 16:0;0-18:1;0	PE O-	GPL	MEM	34	1	0	0	1.19221	0.9831	1.09187
PE O- 16:0;0-18:2;0	PE O-	GPL	MEM	34	2	1	0	0	0	0
PE O- 16:0;0-19:1;0	PE O-	GPL	MEM	35	1	0	0	0	0	0
PE O- 16:0;0-19:2;0	PE O-	GPL	MEM	35	2	1	0	0	0	0
PE O- 16:0;0-19:3;0	PE O-	GPL	MEM	35	3	2	0	0	0	0
PE O- 16:0;0-20:1;0	PE O-	GPL	MEM	36	1	0	0	0.351517	0.312911	0.308499
PE O- 16:0;0-20:2;0	PE O-	GPL	MEM	36	2	1	0	0.546537	0.525701	0.442982
PE O- 16:0;0-20:3;0	PE O-	GPL	MEM	36	3	2	0	0.172938	0.136043	0
PE O- 16:0;0-20:4;0	PE O-	GPL	MEM	36	4	3	0	0.293851	0.213817	0.282314
PE O- 16:0;0-20:5;0	PE O-	GPL	MEM	36	5	4	0	0	0	0
PE O- 16:0;0-21:3;0	PE O-	GPL	MEM	37	3	2	0	0	0	0
PE O- 16:0;0-22:1;0	PE O-	GPL	MEM	38	1	0	0	0.218328	0.176864	0
PE O- 16:0;0-22:2;0	PE O-	GPL	MEM	38	2	1	0	0.185239	0.102063	0
PE O- 16:0;0-22:3;0	PE O-	GPL	MEM	38	3	2	0	0	0	0
PE O- 16:0;0-22:4;0	PE O-	GPL	MEM	38	4	3	0	0	0	0
PE O- 16:0;0-22:5;0	PE O-	GPL	MEM	38	5	4	0	0	0	0
PE O- 16:0;0-22:6;0	PE O-	GPL	MEM	38	6	5	0	0	0	0
PE O- 16:0;0-24:4;0	PE O-	GPL	MEM	40	4	3	0	0	0	0
PE O- 16:0;0-24:5;0	PE O-	GPL	MEM	40	5	4	0	0	0	0
PE O- 16:1;0-16:0;0	PE O-	GPL	MEM	32	1	0	0	0.442812	0.421079	0.490757
PE O- 16:1;0-16:1;0	PE O-	GPL	MEM	32	2	1	0	0.683173	0.60617	0.967266
PE O- 16:1;0-16:2;0	PE O-	GPL	MEM	32	3	2	0	0	0	0
PE O- 16:1;0-17:1;0	PE O-	GPL	MEM	33	2	1	0	0.0504542	0	0
PE O- 16:1;0-18:0;0	PE O-	GPL	MEM	34	1	0	0	0	0	0
PE O- 16:1;0-18:1;0	PE O-	GPL	MEM	34	2	1	0	12.1622	10.6143	12.5149
PE O- 16:1;0-18:2;0	PE O-	GPL	MEM	34	3	2	0	0.987894	0.737129	0.974928
PE O- 16:1;0-18:3;0	PE O-	GPL	MEM	34	4	3	0	0	0	0
PE O- 16:1;0-19:1;0	PE O-	GPL	MEM	35	2	1	0	0	0	0
PE O- 16:1;0-19:2;0	PE O-	GPL	MEM	35	3	2	0	0	0	0
PE O- 16:1;0-19:3;0	PE O-	GPL	MEM	35	4	3	0	0	0	0
PE O- 16:1;0-20:0;0	PE O-	GPL	MEM	36	1	0	0	0.0596437	0	0
PE O- 16:1;0-20:1;0	PE O-	GPL	MEM	36	2	1	0	2.30775	1.74465	2.14025
PE O- 16:1;0-20:2;0	PE O-	GPL	MEM	36	3	2	0	3.44382	2.63104	3.285
PE O- 16:1;0-20:3;0	PE O-	GPL	MEM	36	4	3	0	2.74278	2.20214	2.43828
PE O- 16:1;0-20:4;0	PE O-	GPL	MEM	36	5	4	0	7.35107	6.12676	6.9916
PE O- 16:1;0-20:5;0	PE O-	GPL	MEM	36	6	5	0	4.02208	0	3.41835
PE O- 16:1;0-21:1;0	PE O-	GPL	MEM	37	2	1	0	0	0	0
PE O- 16:1;0-21:2;0	PE O-	GPL	MEM	37	3	2	0	0	0	0
PE O- 16:1;0-21:3;0	PE O-	GPL	MEM	37	4	3	0	0	0	0
PE O- 16:1;0-22:1;0	PE O-	GPL	MEM	38	2	1	0	0.877322	0.633701	0.581278
PE O- 16:1;0-22:2;0	PE O-	GPL	MEM	38	3	2	0	0.319089	0.684365	0.732622
PE O- 16:1;0-22:3;0	PE O-	GPL	MEM	38	4	3	0	0	0	0.118005
PE O- 16:1;0-22:4;0	PE O-	GPL	MEM	38	5	4	0	0.21879	0	0.301622
PE O- 16:1;0-22:5;0	PE O-	GPL	MEM	38	6	5	0	0	0	0
PE O- 16:1;0-22:6;0	PE O-	GPL	MEM	38	7	6	0	0	0	0
PE O- 16:1;0-23:3;0	PE O-	GPL	MEM	39	4	3	0	0	0	0
PE O- 16:1;0-24:3;0	PE O-	GPL	MEM	40	4	3	0	0	0	0
PE O- 16:1;0-24:4;0	PE O-	GPL	MEM	40	5	4	0	0	0	0
PE O- 16:1;0-24:5;0	PE O-	GPL	MEM	40	6	5	0	0	0	0
PE O- 16:1;0-24:6;0	PE O-	GPL	MEM	40	7	6	0	0	0	0
PE O- 16:2;0-16:0;0	PE O-	GPL	MEM	32	2	1	0	0.478574	0.386795	0.198417
PE O- 16:2;0-18:0;0	PE O-	GPL	MEM	34	2	1	0	0.582573	0.381821	0.346874
PE O- 16:2;0-18:1;0	PE O-	GPL	MEM	34	3	2	0	0.633207	0.349853	0.529708
PE O- 16:2;0-20:2;0	PE O-	GPL	MEM	36	4	3	0	0.19619	0	0
PE O- 17:0;0-15:0;0	PE O-	GPL	MEM	32	0	0	0	0	0	0
PE O- 17:0;0-16:1;0	PE O-	GPL	MEM	33	1	0	0	0	0	0
PE O- 17:0;0-17:1;0	PE O-	GPL	MEM	34	1	0	0	0.132336	0	0.124241
PE O- 17:0;0-18:1;0	PE O-	GPL	MEM	35	1	0	0	0.445767	0	0.353057
PE O- 17:0;0-18:2;0	PE O-	GPL	MEM	35	2	1	0	0.170181	0.0687054	0.18597
PE O- 17:0;0-18:3;0	PE O-	GPL	MEM	35	3	2	0	0	0	0
PE O- 17:0;0-19:1;0	PE O-	GPL	MEM	36	1	0	0	0	0	0
PE O- 17:0;0-19:2;0	PE O-	GPL	MEM	36	2	1	0	0	0	0
PE O- 17:0;0-19:3;0	PE O-	GPL	MEM	36	3	2	0	0	0	0
PE O- 17:0;0-20:1;0	PE O-	GPL	MEM	37	1	0	0	0	0	0
PE O- 17:0;0-20:2;0	PE O-	GPL	MEM	37	2	1	0	0.890226	0.555528	0.667911
PE O- 17:0;0-20:3;0	PE O-	GPL	MEM	37	3	2	0	0.331272	0.289505	0.410572
PE O- 17:0;0-20:4;0	PE O-	GPL	MEM	37	4	3	0	0.679224	0.221249	0.463533
PE O- 17:0;0-21:3;0	PE O-	GPL	MEM	38	3	2	0	0	0	0
PE O- 17:0;0-22:3;0	PE O-	GPL	MEM	39	3	2	0	0	0	0
PE O- 17:0;0-22:4;0	PE O-	GPL	MEM	39	4	3	0	0	0	0
PE O- 17:0;0-22:5;0	PE O-	GPL	MEM	39	5	4	0	0	0	0
PE O- 17:0;0-22:6;0	PE O-	GPL	MEM	39	6	5	0	0	0	0
PE O- 17:1;0-16:0;0	PE O-	GPL	MEM	33	1	0	0	0	0	0
PE O- 17:1;0-16:1;0	PE O-	GPL	MEM	33	2	1	0	0.388014	0.481139	0.499381
PE O- 17:1;0-17:0;0	PE O-	GPL	MEM	34	1	0	0	0	0	0
PE O- 17:1;0-17:1;0	PE O-	GPL	MEM	34	2	1	0	0	0	0
PE O- 17:1;0-18:0;0	PE O-	GPL	MEM	35	1	0	0	0.0501449	0	0.0532998
PE O- 17:1;0-18:1;0	PE O-	GPL	MEM	35	2	1	0	2.70484	2.28256	2.51557
PE O- 17:1;0-18:2;0	PE O-	GPL	MEM	35	3	2	0	0.538816	0.333576	0.3167
PE O- 17:1;0-18:3;0	PE O-	GPL	MEM	35	4	3	0	0	0	0
PE O- 17:1;0-19:1;0	PE O-	GPL	MEM	36	2	1	0	0	0	0
PE O- 17:1;0-19:2;0	PE O-	GPL	MEM	36	3	2	0	0	0	0
PE O- 17:1;0-19:3;0	PE O-	GPL	MEM	36	4	3	0	0	0	0
PE O- 17:1;0-20:1;0	PE O-	GPL	MEM	37	2	1	0	0.366417	0.3328	0.455293
PE O- 17:1;0-20:2;0	PE O-	GPL	MEM	37	3	2	0	1.12196	1.02515	0.750354
PE O- 17:1;0-20:3;0	PE O-	GPL	MEM	37	4	3	0	0.498572	0.252634	0.36863
PE O- 17:1;0-20:4;0	PE O-	GPL	MEM	37	5	4	0	1.19534	1.21914	1.24561
PE O- 17:1;0-20:5;0	PE O-	GPL	MEM	37	6	5	0	0	0	0
PE O- 17:1;0-21:3;0	PE O-	GPL	MEM	38	4	3	0	0	0	0
PE O- 17:1;0-22:1;0	PE O-	GPL	MEM	39	2	1	0	0	0	0
PE O- 17:1;0-22:2;0	PE O-	GPL	MEM	39	3	2	0	0	0	0
PE O- 17:1;0-22:3;0	PE O-	GPL	MEM	39	4	3	0	0	0	0
PE O- 17:1;0-22:4;0	PE O-	GPL	MEM	39	5	4	0	0	0	0
PE O- 17:1;0-22:5;0	PE O-	GPL	MEM	39	6	5	0	0	0	0
PE O- 17:2;0-16:0;0	PE O-	GPL	MEM	33	2	1	0	0.0788092	0	0.135011
PE O- 17:2;0-16:1;0	PE O-	GPL	MEM	33	3	2	0	0	0	0
PE O- 17:2;0-17:1;0	PE O-	GPL	MEM	34	3	2	0	0	0	0
PE O- 17:2;0-18:0;0	PE O-	GPL	MEM	35	2	1	0	0	0	0.0378398
PE O- 17:2;0-18:1;0	PE O-	GPL	MEM	35	3	2	0	0.836172	0.605537	0.716291
PE O- 17:2;0-18:2;0	PE O-	GPL	MEM	35	4	3	0	0	0	0
PE O- 17:2;0-20:1;0	PE O-	GPL	MEM	37	3	2	0	0	0	0
PE O- 17:2;0-20:2;0	PE O-	GPL	MEM	37	4	3	0	0	0	0
PE O- 17:2;0-20:3;0	PE O-	GPL	MEM	37	5	4	0	0	0	0
PE O- 18:0;0-14:0;0	PE O-	GPL	MEM	32	0	0	0	0	0	0
PE O- 18:0;0-16:0;0	PE O-	GPL	MEM	34	0	0	0	0	0	0
PE O- 18:0;0-16:1;0	PE O-	GPL	MEM	34	1	0	0	0.448374	0.207198	0.398895
PE O- 18:0;0-17:1;0	PE O-	GPL	MEM	35	1	0	0	0.00365292	0	0
PE O- 18:0;0-18:1;0	PE O-	GPL	MEM	36	1	0	0	2.45147	2.12278	2.16548
PE O- 18:0;0-18:2;0	PE O-	GPL	MEM	36	2	1	0	0.205736	0	0.18598
PE O- 18:0;0-18:3;0	PE O-	GPL	MEM	36	3	2	0	0	0	0
PE O- 18:0;0-19:1;0	PE O-	GPL	MEM	37	1	0	0	0	0	0
PE O- 18:0;0-19:3;0	PE O-	GPL	MEM	37	3	2	0	0	0	0
PE O- 18:0;0-20:1;0	PE O-	GPL	MEM	38	1	0	0	1.07907	1.19335	1.45585
PE O- 18:0;0-20:2;0	PE O-	GPL	MEM	38	2	1	0	1.39666	0.795202	1.05022
PE O- 18:0;0-20:3;0	PE O-	GPL	MEM	38	3	2	0	0.199271	0.236287	0.195914
PE O- 18:0;0-20:4;0	PE O-	GPL	MEM	38	4	3	0	1.13606	0.734797	0.894435
PE O- 18:0;0-20:5;0	PE O-	GPL	MEM	38	5	4	0	0.20241	0	0
PE O- 18:0;0-21:3;0	PE O-	GPL	MEM	39	3	2	0	0	0	0
PE O- 18:0;0-22:1;0	PE O-	GPL	MEM	40	1	0	0	0	0.399106	0.443851
PE O- 18:0;0-22:2;0	PE O-	GPL	MEM	40	2	1	0	0.219564	0.170919	0.246577
PE O- 18:0;0-22:3;0	PE O-	GPL	MEM	40	3	2	0	0	0	0
PE O- 18:0;0-22:4;0	PE O-	GPL	MEM	40	4	3	0	0	0	0
PE O- 18:0;0-22:5;0	PE O-	GPL	MEM	40	5	4	0	0	0	0
PE O- 18:0;0-22:6;0	PE O-	GPL	MEM	40	6	5	0	0	0	0
PE O- 18:0;0-24:4;0	PE O-	GPL	MEM	42	4	3	0	0	0	0
PE O- 18:0;0-24:5;0	PE O-	GPL	MEM	42	5	4	0	0	0	0
PE O- 18:1;0-14:0;0	PE O-	GPL	MEM	32	1	0	0	0	0	0
PE O- 18:1;0-15:0;0	PE O-	GPL	MEM	33	1	0	0	0	0	0
PE O- 18:1;0-15:1;0	PE O-	GPL	MEM	33	2	1	0	0	0	0
PE O- 18:1;0-16:0;0	PE O-	GPL	MEM	34	1	0	0	2.96754	2.66158	2.57252
PE O- 18:1;0-16:1;0	PE O-	GPL	MEM	34	2	1	0	2.72965	2.78255	3.29997
PE O- 18:1;0-16:2;0	PE O-	GPL	MEM	34	3	2	0	0	0	0
PE O- 18:1;0-17:0;0	PE O-	GPL	MEM	35	1	0	0	0.00514236	0	0
PE O- 18:1;0-17:1;0	PE O-	GPL	MEM	35	2	1	0	0.103067	0.0531706	0.0712951
PE O- 18:1;0-18:0;0	PE O-	GPL	MEM	36	1	0	0	0	0	0
PE O- 18:1;0-18:1;0	PE O-	GPL	MEM	36	2	1	0	22.0818	18.2496	21.1295
PE O- 18:1;0-18:2;0	PE O-	GPL	MEM	36	3	2	0	2.16393	1.99043	1.94594
PE O- 18:1;0-18:3;0	PE O-	GPL	MEM	36	4	3	0	0	0	0.203263
PE O- 18:1;0-19:1;0	PE O-	GPL	MEM	37	2	1	0	0.171383	0.0752533	0
PE O- 18:1;0-19:2;0	PE O-	GPL	MEM	37	3	2	0	0	0	0.156558
PE O- 18:1;0-19:3;0	PE O-	GPL	MEM	37	4	3	0	0	0	0
PE O- 18:1;0-20:0;0	PE O-	GPL	MEM	38	1	0	0	0.680763	0.255017	0.476914
PE O- 18:1;0-20:1;0	PE O-	GPL	MEM	38	2	1	0	4.35304	3.56026	4.2666
PE O- 18:1;0-20:2;0	PE O-	GPL	MEM	38	3	2	0	6.66789	4.98516	6.02023
PE O- 18:1;0-20:3;0	PE O-	GPL	MEM	38	4	3	0	4.0535	3.09194	3.82416
PE O- 18:1;0-20:4;0	PE O-	GPL	MEM	38	5	4	0	4.46953	1.84352	4.75302
PE O- 18:1;0-20:5;0	PE O-	GPL	MEM	38	6	5	0	4.07114	2.77985	3.45534
PE O- 18:1;0-21:1;0	PE O-	GPL	MEM	39	2	1	0	0	0	0
PE O- 18:1;0-21:2;0	PE O-	GPL	MEM	39	3	2	0	0	0	0
PE O- 18:1;0-21:3;0	PE O-	GPL	MEM	39	4	3	0	0	0	0
PE O- 18:1;0-22:0;0	PE O-	GPL	MEM	40	1	0	0	0	0	0
PE O- 18:1;0-22:1;0	PE O-	GPL	MEM	40	2	1	0	1.85752	1.65521	1.84701
PE O- 18:1;0-22:2;0	PE O-	GPL	MEM	40	3	2	0	1.65011	1.31082	1.0498
PE O- 18:1;0-22:3;0	PE O-	GPL	MEM	40	4	3	0	0	0.220849	0
PE O- 18:1;0-22:4;0	PE O-	GPL	MEM	40	5	4	0	2.17421	1.46726	1.932
PE O- 18:1;0-22:5;0	PE O-	GPL	MEM	40	6	5	0	1.29622	0.814131	2.72258
PE O- 18:1;0-22:6;0	PE O-	GPL	MEM	40	7	6	0	0	0	0
PE O- 18:1;0-23:3;0	PE O-	GPL	MEM	41	4	3	0	0	0	0
PE O- 18:1;0-24:3;0	PE O-	GPL	MEM	42	4	3	0	0	0	0
PE O- 18:1;0-24:4;0	PE O-	GPL	MEM	42	5	4	0	0	0	0
PE O- 18:1;0-24:5;0	PE O-	GPL	MEM	42	6	5	0	0	0	0
PE O- 18:1;0-24:6;0	PE O-	GPL	MEM	42	7	6	0	0	0	0
PE O- 18:2;0-14:0;0	PE O-	GPL	MEM	32	2	1	0	0.141698	0.100845	0.202951
PE O- 18:2;0-15:0;0	PE O-	GPL	MEM	33	2	1	0	0	0	0
PE O- 18:2;0-15:1;0	PE O-	GPL	MEM	33	3	2	0	0	0	0
PE O- 18:2;0-16:0;0	PE O-	GPL	MEM	34	2	1	0	7.73824	6.7132	7.4424
PE O- 18:2;0-16:1;0	PE O-	GPL	MEM	34	3	2	0	3.33734	2.89394	3.40308
PE O- 18:2;0-16:2;0	PE O-	GPL	MEM	34	4	3	0	0	0	0
PE O- 18:2;0-17:0;0	PE O-	GPL	MEM	35	2	1	0	0.0940602	0.0499221	0.0504055
PE O- 18:2;0-17:1;0	PE O-	GPL	MEM	35	3	2	0	0.293156	0.278664	0.342851
PE O- 18:2;0-18:0;0	PE O-	GPL	MEM	36	2	1	0	0	0	0
PE O- 18:2;0-18:1;0	PE O-	GPL	MEM	36	3	2	0	30.3241	25.0084	29.5491
PE O- 18:2;0-18:2;0	PE O-	GPL	MEM	36	4	3	0	3.45723	2.66466	2.99299
PE O- 18:2;0-18:3;0	PE O-	GPL	MEM	36	5	4	0	0	0	0
PE O- 18:2;0-19:1;0	PE O-	GPL	MEM	37	3	2	0	0	0	0.154584
PE O- 18:2;0-19:2;0	PE O-	GPL	MEM	37	4	3	0	0	0.181525	0
PE O- 18:2;0-19:3;0	PE O-	GPL	MEM	37	5	4	0	0	0	0
PE O- 18:2;0-20:0;0	PE O-	GPL	MEM	38	2	1	0	0	0.334846	0.228412
PE O- 18:2;0-20:1;0	PE O-	GPL	MEM	38	3	2	0	4.05564	3.11446	3.54589
PE O- 18:2;0-20:2;0	PE O-	GPL	MEM	38	4	3	0	7.48959	6.50923	6.91381
PE O- 18:2;0-20:3;0	PE O-	GPL	MEM	38	5	4	0	3.91329	1.399	3.94693
PE O- 18:2;0-20:4;0	PE O-	GPL	MEM	38	6	5	0	17.7578	16.1592	18.063
PE O- 18:2;0-20:5;0	PE O-	GPL	MEM	38	7	6	0	10.8273	9.14262	9.78384
PE O- 18:2;0-21:1;0	PE O-	GPL	MEM	39	3	2	0	0	0.406257	0
PE O- 18:2;0-21:2;0	PE O-	GPL	MEM	39	4	3	0	0	0	0
PE O- 18:2;0-21:3;0	PE O-	GPL	MEM	39	5	4	0	0	0	0
PE O- 18:2;0-22:1;0	PE O-	GPL	MEM	40	3	2	0	1.69055	1.74138	1.89974
PE O- 18:2;0-22:2;0	PE O-	GPL	MEM	40	4	3	0	2.0554	1.71153	1.99292
PE O- 18:2;0-22:3;0	PE O-	GPL	MEM	40	5	4	0	0	0.456563	0
PE O- 18:2;0-22:4;0	PE O-	GPL	MEM	40	6	5	0	1.37174	1.19664	0
PE O- 18:2;0-22:5;0	PE O-	GPL	MEM	40	7	6	0	0	3.30632	0
PE O- 18:2;0-22:6;0	PE O-	GPL	MEM	40	8	7	0	0	0	0
PE O- 18:2;0-24:3;0	PE O-	GPL	MEM	42	5	4	0	0	0	0
PE O- 18:2;0-24:4;0	PE O-	GPL	MEM	42	6	5	0	0	0	0
PE O- 18:2;0-24:5;0	PE O-	GPL	MEM	42	7	6	0	0	0	0
PG 14:0;0-16:0;0	PG	GPL	MEM	30	0	0	0	0	0	0
PG 14:0;0-18:0;0	PG	GPL	MEM	32	0	0	0	0	0	0
PG 14:0;0-18:1;0	PG	GPL	MEM	32	1	1	0	0	0	0
PG 15:0;0-18:1;0	PG	GPL	MEM	33	1	1	0	0	0	0
PG 16:0;0-16:0;0	PG	GPL	MEM	32	0	0	0	0	0	0
PG 16:0;0-16:1;0	PG	GPL	MEM	32	1	1	0	0	0	0
PG 16:0;0-17:1;0	PG	GPL	MEM	33	1	1	0	0	0	0
PG 16:0;0-18:0;0	PG	GPL	MEM	34	0	0	0	0	0	0
PG 16:0;0-18:1;0	PG	GPL	MEM	34	1	1	0	1.81755	1.80012	2.09079
PG 16:0;0-18:2;0	PG	GPL	MEM	34	2	2	0	0	0	0
PG 16:0;0-18:3;0	PG	GPL	MEM	34	3	3	0	0	0	0
PG 16:0;0-19:1;0	PG	GPL	MEM	35	1	1	0	0	0	0
PG 16:0;0-20:1;0	PG	GPL	MEM	36	1	1	0	0	0	0
PG 16:0;0-20:2;0	PG	GPL	MEM	36	2	2	0	0	0	0
PG 16:0;0-20:3;0	PG	GPL	MEM	36	3	3	0	0	0	0
PG 16:0;0-20:4;0	PG	GPL	MEM	36	4	4	0	0	0	0
PG 16:1;0-16:1;0	PG	GPL	MEM	32	2	2	0	0	0	0
PG 16:1;0-17:1;0	PG	GPL	MEM	33	2	2	0	0	0	0
PG 16:1;0-18:0;0	PG	GPL	MEM	34	1	1	0	0.140081	0	0
PG 16:1;0-18:1;0	PG	GPL	MEM	34	2	2	0	0.928299	0.86901	1.0322
PG 16:1;0-18:2;0	PG	GPL	MEM	34	3	3	0	0	0	0
PG 16:1;0-19:1;0	PG	GPL	MEM	35	2	2	0	0	0	0
PG 16:1;0-20:1;0	PG	GPL	MEM	36	2	2	0	0	0	0
PG 16:1;0-20:2;0	PG	GPL	MEM	36	3	3	0	0	0	0
PG 16:1;0-20:3;0	PG	GPL	MEM	36	4	4	0	0	0	0
PG 16:1;0-20:4;0	PG	GPL	MEM	36	5	5	0	0	0	0
PG 16:1;0-22:3;0	PG	GPL	MEM	38	4	4	0	0	0	0
PG 16:1;0-22:4;0	PG	GPL	MEM	38	5	5	0	0	0	0
PG 16:1;0-22:5;0	PG	GPL	MEM	38	6	6	0	0	0	0
PG 17:0;0-18:1;0	PG	GPL	MEM	35	1	1	0	0.239816	0	0
PG 17:1;0-18:1;0	PG	GPL	MEM	35	2	2	0	0	0	0
PG 17:1;0-18:2;0	PG	GPL	MEM	35	3	3	0	0	0	0
PG 18:0;0-18:0;0	PG	GPL	MEM	36	0	0	0	0	0	0
PG 18:0;0-18:1;0	PG	GPL	MEM	36	1	1	0	1.70366	1.32163	1.48631
PG 18:0;0-18:2;0	PG	GPL	MEM	36	2	2	0	0	0.122313	0
PG 18:0;0-20:2;0	PG	GPL	MEM	38	2	2	0	0	0	0
PG 18:0;0-20:3;0	PG	GPL	MEM	38	3	3	0	0	0	0
PG 18:0;0-20:4;0	PG	GPL	MEM	38	4	4	0	0	0	0
PG 18:1;0-18:1;0	PG	GPL	MEM	36	2	2	0	5.94135	5.59892	6.5799
PG 18:1;0-18:2;0	PG	GPL	MEM	36	3	3	0	0.651729	0.661828	0.7433
PG 18:1;0-18:3;0	PG	GPL	MEM	36	4	4	0	0	0	0
PG 18:1;0-19:1;0	PG	GPL	MEM	37	2	2	0	0	0	0
PG 18:1;0-19:2;0	PG	GPL	MEM	37	3	3	0	0	0	0
PG 18:1;0-19:3;0	PG	GPL	MEM	37	4	4	0	0	0	0
PG 18:1;0-20:1;0	PG	GPL	MEM	38	2	2	0	0	0.237314	0
PG 18:1;0-20:2;0	PG	GPL	MEM	38	3	3	0	0.64904	0.650287	0.724401
PG 18:1;0-20:3;0	PG	GPL	MEM	38	4	4	0	0	0	0.21749
PG 18:1;0-20:4;0	PG	GPL	MEM	38	5	5	0	0	0	0
PG 18:1;0-21:3;0	PG	GPL	MEM	39	4	4	0	0	0	0
PG 18:1;0-22:5;0	PG	GPL	MEM	40	6	6	0	0	0	0
PG 18:1;0-22:6;0	PG	GPL	MEM	40	7	7	0	0	0	9.78986
PG 18:2;0-18:2;0	PG	GPL	MEM	36	4	4	0	0	0	0
PG 18:2;0-20:2;0	PG	GPL	MEM	38	4	4	0	0	0	0
PG 18:2;0-20:3;0	PG	GPL	MEM	38	5	5	0	0	0	0
PG 18:2;0-20:4;0	PG	GPL	MEM	38	6	6	0	0	0	0
PG 20:2;0-20:2;0	PG	GPL	MEM	40	4	4	0	0	0	0
PG 20:2;0-20:3;0	PG	GPL	MEM	40	5	5	0	0	0	0
PG 20:3;0-20:3;0	PG	GPL	MEM	40	6	6	0	0	0	0
PG 20:4;0-20:4;0	PG	GPL	MEM	40	8	8	0	0	0	0
PG 20:4;0-22:4;0	PG	GPL	MEM	42	8	8	0	0	0	0
PG 22:4;0-22:4;0	PG	GPL	MEM	44	8	8	0	0	0	0
PG 22:6;0-22:6;0	PG	GPL	MEM	44	12	12	0	0	3.74323	0
PI 14:0;0-18:0;0	PI	GPL	MEM	32	0	0	0	0	0	0
PI 14:0;0-18:1;0	PI	GPL	MEM	32	1	1	0	0	0	0
PI 14:1;0-18:0;0	PI	GPL	MEM	32	1	1	0	0	0	0
PI 14:1;0-18:1;0	PI	GPL	MEM	32	2	2	0	0	0	0
PI 15:0;0-17:0;0	PI	GPL	MEM	32	0	0	0	0.245527	0	0
PI 15:0;0-17:1;0	PI	GPL	MEM	32	1	1	0	0	0	0
PI 15:0;0-18:1;0	PI	GPL	MEM	33	1	1	0	0	0	0
PI 15:0;0-20:1;0	PI	GPL	MEM	35	1	1	0	0	0	0
PI 15:0;0-20:2;0	PI	GPL	MEM	35	2	2	0	0	0.0462978	0.174826
PI 15:0;0-20:3;0	PI	GPL	MEM	35	3	3	0	0	0	0
PI 16:0;0-16:1;0	PI	GPL	MEM	32	1	1	0	0	0.825903	0.771901
PI 16:0;0-17:1;0	PI	GPL	MEM	33	1	1	0	0	0	0
PI 16:0;0-18:0;0	PI	GPL	MEM	34	0	0	0	0	0	0
PI 16:0;0-18:1;0	PI	GPL	MEM	34	1	1	0	6.9867	7.02446	8.03819
PI 16:0;0-18:2;0	PI	GPL	MEM	34	2	2	0	0.794996	0.844442	0.67663
PI 16:0;0-18:3;0	PI	GPL	MEM	34	3	3	0	0	0	0
PI 16:0;0-19:1;0	PI	GPL	MEM	35	1	1	0	0	0.256219	0
PI 16:0;0-19:2;0	PI	GPL	MEM	35	2	2	0	0	0.32474	0
PI 16:0;0-19:3;0	PI	GPL	MEM	35	3	3	0	0	0	0
PI 16:0;0-20:0;0	PI	GPL	MEM	36	0	0	0	0	0	0
PI 16:0;0-20:1;0	PI	GPL	MEM	36	1	1	0	0	0	0
PI 16:0;0-20:2;0	PI	GPL	MEM	36	2	2	0	5.1307	4.9012	4.95832
PI 16:0;0-20:3;0	PI	GPL	MEM	36	3	3	0	0.842214	1.00154	0.600688
PI 16:0;0-20:4;0	PI	GPL	MEM	36	4	4	0	1.65447	1.80283	1.68175
PI 16:0;0-20:5;0	PI	GPL	MEM	36	5	5	0	0	0	0
PI 16:0;0-21:3;0	PI	GPL	MEM	37	3	3	0	0	0	0
PI 16:0;0-22:2;0	PI	GPL	MEM	38	2	2	0	0	0	0
PI 16:0;0-22:3;0	PI	GPL	MEM	38	3	3	0	0	0	0
PI 16:0;0-22:4;0	PI	GPL	MEM	38	4	4	0	0	0	0
PI 16:0;0-22:5;0	PI	GPL	MEM	38	5	5	0	0	0	0
PI 16:0;0-22:6;0	PI	GPL	MEM	38	6	6	0	0	0	0
PI 16:1;0-16:1;0	PI	GPL	MEM	32	2	2	0	0	0	0
PI 16:1;0-17:0;0	PI	GPL	MEM	33	1	1	0	0	0	0
PI 16:1;0-18:0;0	PI	GPL	MEM	34	1	1	0	3.07386	2.63494	2.61285
PI 16:1;0-18:1;0	PI	GPL	MEM	34	2	2	0	3.07744	2.83324	3.26844
PI 16:1;0-18:2;0	PI	GPL	MEM	34	3	3	0	0	0	0
PI 16:1;0-19:1;0	PI	GPL	MEM	35	2	2	0	0	0	0
PI 16:1;0-20:1;0	PI	GPL	MEM	36	2	2	0	0	0	0
PI 16:1;0-20:2;0	PI	GPL	MEM	36	3	3	0	0.226994	0	0.177891
PI 16:1;0-20:3;0	PI	GPL	MEM	36	4	4	0	0	0	0
PI 16:1;0-20:4;0	PI	GPL	MEM	36	5	5	0	0	0	0
PI 16:1;0-21:3;0	PI	GPL	MEM	37	4	4	0	0	0	0
PI 16:1;0-22:2;0	PI	GPL	MEM	38	3	3	0	0	0	0
PI 16:1;0-22:3;0	PI	GPL	MEM	38	4	4	0	0	0	0
PI 17:0;0-17:0;0	PI	GPL	MEM	34	0	0	0	0	0	0
PI 17:0;0-17:1;0	PI	GPL	MEM	34	1	1	0	0	0	0
PI 17:0;0-18:0;0	PI	GPL	MEM	35	0	0	0	0	0	0
PI 17:0;0-18:1;0	PI	GPL	MEM	35	1	1	0	0.535981	0.329815	0.557422
PI 17:0;0-18:2;0	PI	GPL	MEM	35	2	2	0	0	0	0
PI 17:0;0-18:3;0	PI	GPL	MEM	35	3	3	0	0	0	0
PI 17:0;0-19:2;0	PI	GPL	MEM	36	2	2	0	0	0	0
PI 17:0;0-19:3;0	PI	GPL	MEM	36	3	3	0	0	0	0
PI 17:0;0-20:1;0	PI	GPL	MEM	37	1	1	0	0	0	0
PI 17:0;0-20:2;0	PI	GPL	MEM	37	2	2	0	0.515948	0.42369	0.402669
PI 17:0;0-20:3;0	PI	GPL	MEM	37	3	3	0	0	0	0
PI 17:0;0-20:4;0	PI	GPL	MEM	37	4	4	0	0	0	0
PI 17:0;0-22:4;0	PI	GPL	MEM	39	4	4	0	0	0	0
PI 17:0;0-22:5;0	PI	GPL	MEM	39	5	5	0	0	0	0
PI 17:0;0-22:6;0	PI	GPL	MEM	39	6	6	0	0	0	0
PI 17:1;0-17:1;0	PI	GPL	MEM	34	2	2	0	0	0	0
PI 17:1;0-18:0;0	PI	GPL	MEM	35	1	1	0	0.399863	0.235263	0.350069
PI 17:1;0-18:1;0	PI	GPL	MEM	35	2	2	0	0	0.384597	0.644769
PI 17:1;0-18:2;0	PI	GPL	MEM	35	3	3	0	0	0	0
PI 17:1;0-19:2;0	PI	GPL	MEM	36	3	3	0	0	0	0
PI 17:1;0-19:3;0	PI	GPL	MEM	36	4	4	0	0	0	0
PI 17:1;0-20:1;0	PI	GPL	MEM	37	2	2	0	0	0.0731609	0
PI 17:1;0-20:2;0	PI	GPL	MEM	37	3	3	0	0	0	0
PI 17:1;0-20:3;0	PI	GPL	MEM	37	4	4	0	0	0	0
PI 17:1;0-20:4;0	PI	GPL	MEM	37	5	5	0	0	0	0
PI 18:0;0-18:0;0	PI	GPL	MEM	36	0	0	0	0	0	0
PI 18:0;0-18:1;0	PI	GPL	MEM	36	1	1	0	25.7013	23.3799	25.4834
PI 18:0;0-18:2;0	PI	GPL	MEM	36	2	2	0	4.33214	4.12333	4.2978
PI 18:0;0-18:3;0	PI	GPL	MEM	36	3	3	0	0	0	0.387197
PI 18:0;0-19:1;0	PI	GPL	MEM	37	1	1	0	0	0	0
PI 18:0;0-19:2;0	PI	GPL	MEM	37	2	2	0	1.4855	1.45464	1.61051
PI 18:0;0-19:3;0	PI	GPL	MEM	37	3	3	0	0	0	0
PI 18:0;0-20:1;0	PI	GPL	MEM	38	1	1	0	0	0	0
PI 18:0;0-20:2;0	PI	GPL	MEM	38	2	2	0	29.6179	26.4371	30.4412
PI 18:0;0-20:3;0	PI	GPL	MEM	38	3	3	0	8.24812	7.35384	8.08213
PI 18:0;0-20:4;0	PI	GPL	MEM	38	4	4	0	7.23643	6.90866	7.62805
PI 18:0;0-20:5;0	PI	GPL	MEM	38	5	5	0	1.93334	1.92366	1.9268
PI 18:0;0-21:3;0	PI	GPL	MEM	39	3	3	0	0	0	0
PI 18:0;0-22:3;0	PI	GPL	MEM	40	3	3	0	6.80541	0	0
PI 18:0;0-22:4;0	PI	GPL	MEM	40	4	4	0	13.6711	12.8841	14.0325
PI 18:0;0-22:5;0	PI	GPL	MEM	40	5	5	0	2.54264	0	2.06275
PI 18:0;0-22:6;0	PI	GPL	MEM	40	6	6	0	1.99601	0	0
PI 18:1;0-18:1;0	PI	GPL	MEM	36	2	2	0	27.4141	25.8111	29.1256
PI 18:1;0-18:2;0	PI	GPL	MEM	36	3	3	0	2.09876	2.18168	1.89754
PI 18:1;0-18:3;0	PI	GPL	MEM	36	4	4	0	0	0	0
PI 18:1;0-19:0;0	PI	GPL	MEM	37	1	1	0	0	0	0
PI 18:1;0-19:1;0	PI	GPL	MEM	37	2	2	0	0.354442	0.256642	0.324588
PI 18:1;0-19:2;0	PI	GPL	MEM	37	3	3	0	0	0	0
PI 18:1;0-19:3;0	PI	GPL	MEM	37	4	4	0	0	0	0
PI 18:1;0-20:0;0	PI	GPL	MEM	38	1	1	0	0	0	0
PI 18:1;0-20:1;0	PI	GPL	MEM	38	2	2	0	1.76195	1.49478	1.67727
PI 18:1;0-20:2;0	PI	GPL	MEM	38	3	3	0	8.72711	8.17382	9.0172
PI 18:1;0-20:3;0	PI	GPL	MEM	38	4	4	0	2.21305	1.86349	2.03398
PI 18:1;0-20:4;0	PI	GPL	MEM	38	5	5	0	1.63596	1.55289	1.78612
PI 18:1;0-20:5;0	PI	GPL	MEM	38	6	6	0	0	0	0
PI 18:1;0-21:2;0	PI	GPL	MEM	39	3	3	0	0	0	0
PI 18:1;0-21:3;0	PI	GPL	MEM	39	4	4	0	0	0	0
PI 18:1;0-22:2;0	PI	GPL	MEM	40	3	3	0	0	0	0
PI 18:1;0-22:3;0	PI	GPL	MEM	40	4	4	0	0	0	0
PI 18:1;0-22:4;0	PI	GPL	MEM	40	5	5	0	0	0	0
PI 18:1;0-22:5;0	PI	GPL	MEM	40	6	6	0	0	0	0
PI 18:1;0-22:6;0	PI	GPL	MEM	40	7	7	0	0	0	0
PI 18:2;0-18:2;0	PI	GPL	MEM	36	4	4	0	0	0	0
PI 18:2;0-18:3;0	PI	GPL	MEM	36	5	5	0	0	0	0
PI 18:2;0-19:1;0	PI	GPL	MEM	37	3	3	0	0	0	0
PI 18:2;0-19:3;0	PI	GPL	MEM	37	5	5	0	0	0	0
PI 18:2;0-20:1;0	PI	GPL	MEM	38	3	3	0	0	0	0
PI 18:2;0-20:2;0	PI	GPL	MEM	38	4	4	0	0	0	0
PI 18:2;0-20:3;0	PI	GPL	MEM	38	5	5	0	0	0	0
PI 18:2;0-20:4;0	PI	GPL	MEM	38	6	6	0	0	0	0
PI 19:0;0-20:3;0	PI	GPL	MEM	39	3	3	0	0	0	0
PI 19:0;0-20:4;0	PI	GPL	MEM	39	4	4	0	0	0	0
PI 19:1;0-19:1;0	PI	GPL	MEM	38	2	2	0	0	0	0
PI 19:1;0-20:3;0	PI	GPL	MEM	39	4	4	0	0	0	0
PI 19:1;0-20:4;0	PI	GPL	MEM	39	5	5	0	0	0	0
PI 19:2;0-20:3;0	PI	GPL	MEM	39	5	5	0	0	0	0
PI 20:1;0-20:2;0	PI	GPL	MEM	40	3	3	0	7.78082	0	0
PI 20:1;0-20:3;0	PI	GPL	MEM	40	4	4	0	0	0	0
PI 20:1;0-20:4;0	PI	GPL	MEM	40	5	5	0	0	0	0
PI 20:2;0-20:2;0	PI	GPL	MEM	40	4	4	0	5.58449	3.99556	3.18859
PI 20:2;0-20:3;0	PI	GPL	MEM	40	5	5	0	0	0	0
PI 20:2;0-20:4;0	PI	GPL	MEM	40	6	6	0	0	0	0
PI 20:3;0-20:3;0	PI	GPL	MEM	40	6	6	0	0	0	0
PI 20:4;0-20:4;0	PI	GPL	MEM	40	8	8	0	0	0	0
PS 14:0;0-18:0;0	PS	GPL	MEM	32	0	0	0	0	0	0
PS 14:0;0-18:1;0	PS	GPL	MEM	32	1	1	0	0	0	0
PS 14:1;0-18:0;0	PS	GPL	MEM	32	1	1	0	0	0	0
PS 15:0;0-18:1;0	PS	GPL	MEM	33	1	1	0	0	0	0
PS 15:0;0-22:4;0	PS	GPL	MEM	37	4	4	0	0	0	0
PS 15:1;0-18:0;0	PS	GPL	MEM	33	1	1	0	0	0	0
PS 16:0;0-16:0;0	PS	GPL	MEM	32	0	0	0	0	0	0
PS 16:0;0-16:1;0	PS	GPL	MEM	32	1	1	0	0	0	0
PS 16:0;0-17:1;0	PS	GPL	MEM	33	1	1	0	0	0	0
PS 16:0;0-18:0;0	PS	GPL	MEM	34	0	0	0	2.79358	2.56762	2.85329
PS 16:0;0-18:1;0	PS	GPL	MEM	34	1	1	0	4.10433	4.43218	4.69537
PS 16:0;0-18:2;0	PS	GPL	MEM	34	2	2	0	0	0	0
PS 16:0;0-19:1;0	PS	GPL	MEM	35	1	1	0	0	0	0
PS 16:0;0-20:1;0	PS	GPL	MEM	36	1	1	0	0	0	0
PS 16:0;0-20:2;0	PS	GPL	MEM	36	2	2	0	0	0	0
PS 16:0;0-20:3;0	PS	GPL	MEM	36	3	3	0	0	0	0
PS 16:0;0-20:4;0	PS	GPL	MEM	36	4	4	0	0	0	0
PS 16:0;0-21:3;0	PS	GPL	MEM	37	3	3	0	0	0	0
PS 16:0;0-22:2;0	PS	GPL	MEM	38	2	2	0	0	0	0
PS 16:0;0-22:3;0	PS	GPL	MEM	38	3	3	0	0	0	0
PS 16:0;0-22:4;0	PS	GPL	MEM	38	4	4	0	0	0	0
PS 16:0;0-22:5;0	PS	GPL	MEM	38	5	5	0	0	0	0
PS 16:0;0-22:6;0	PS	GPL	MEM	38	6	6	0	0	0	0
PS 16:1;0-17:0;0	PS	GPL	MEM	33	1	1	0	0	0	0
PS 16:1;0-18:0;0	PS	GPL	MEM	34	1	1	0	5.17063	4.46469	5.61091
PS 16:1;0-18:1;0	PS	GPL	MEM	34	2	2	0	0	0	0
PS 16:1;0-18:2;0	PS	GPL	MEM	34	3	3	0	0	0	0
PS 16:1;0-19:0;0	PS	GPL	MEM	35	1	1	0	0	0	0
PS 16:1;0-19:1;0	PS	GPL	MEM	35	2	2	0	0	0	0
PS 16:1;0-19:2;0	PS	GPL	MEM	35	3	3	0	0	0	0
PS 16:1;0-20:0;0	PS	GPL	MEM	36	1	1	0	0	0	0
PS 16:1;0-20:1;0	PS	GPL	MEM	36	2	2	0	0	0	0
PS 16:1;0-20:2;0	PS	GPL	MEM	36	3	3	0	0	0	0
PS 16:1;0-20:3;0	PS	GPL	MEM	36	4	4	0	0	0	0
PS 16:1;0-21:2;0	PS	GPL	MEM	37	3	3	0	0	0	0
PS 16:1;0-21:3;0	PS	GPL	MEM	37	4	4	0	0	0	0
PS 16:1;0-22:0;0	PS	GPL	MEM	38	1	1	0	0	0	0
PS 16:1;0-22:1;0	PS	GPL	MEM	38	2	2	0	0	0	0
PS 16:1;0-22:2;0	PS	GPL	MEM	38	3	3	0	0	0	0
PS 16:1;0-22:3;0	PS	GPL	MEM	38	4	4	0	0	0	0
PS 16:1;0-22:4;0	PS	GPL	MEM	38	5	5	0	0	0	0
PS 16:1;0-23:3;0	PS	GPL	MEM	39	4	4	0	0	0	0
PS 16:1;0-24:0;0	PS	GPL	MEM	40	1	1	0	0	0	0
PS 16:1;0-24:1;0	PS	GPL	MEM	40	2	2	0	0	0	0
PS 16:1;0-24:2;0	PS	GPL	MEM	40	3	3	0	0	0	0
PS 16:1;0-24:3;0	PS	GPL	MEM	40	4	4	0	0	0	0
PS 16:1;0-24:4;0	PS	GPL	MEM	40	5	5	0	0	0	0
PS 16:2;0-18:0;0	PS	GPL	MEM	34	2	2	0	0	0	0
PS 17:0;0-17:1;0	PS	GPL	MEM	34	1	1	0	0	0	0
PS 17:0;0-18:0;0	PS	GPL	MEM	35	0	0	0	0	0	0
PS 17:0;0-18:1;0	PS	GPL	MEM	35	1	1	0	3.02225	2.73672	2.61901
PS 17:0;0-18:2;0	PS	GPL	MEM	35	2	2	0	0	0	0
PS 17:0;0-19:1;0	PS	GPL	MEM	36	1	1	0	0	0	0
PS 17:0;0-20:1;0	PS	GPL	MEM	37	1	1	0	0	0	0
PS 17:0;0-20:2;0	PS	GPL	MEM	37	2	2	0	0	0	0
PS 17:0;0-20:3;0	PS	GPL	MEM	37	3	3	0	0	0	0
PS 17:0;0-20:4;0	PS	GPL	MEM	37	4	4	0	0	0	0
PS 17:0;0-21:3;0	PS	GPL	MEM	38	3	3	0	0	0	0
PS 17:0;0-22:3;0	PS	GPL	MEM	39	3	3	0	0	0	0
PS 17:0;0-22:4;0	PS	GPL	MEM	39	4	4	0	0	0	0
PS 17:0;0-22:5;0	PS	GPL	MEM	39	5	5	0	0	0	0
PS 17:0;0-22:6;0	PS	GPL	MEM	39	6	6	0	0	0	0
PS 17:1;0-17:1;0	PS	GPL	MEM	34	2	2	0	0	0	0
PS 17:1;0-18:0;0	PS	GPL	MEM	35	1	1	0	0.99684	0.897636	1.04914
PS 17:1;0-18:1;0	PS	GPL	MEM	35	2	2	0	0	0	0
PS 17:1;0-18:2;0	PS	GPL	MEM	35	3	3	0	0	0	0
PS 17:1;0-20:1;0	PS	GPL	MEM	37	2	2	0	0	0	0
PS 17:1;0-20:2;0	PS	GPL	MEM	37	3	3	0	0	0	0
PS 17:1;0-20:3;0	PS	GPL	MEM	37	4	4	0	0	0	0
PS 17:1;0-21:3;0	PS	GPL	MEM	38	4	4	0	0	0	0
PS 18:0;0-18:1;0	PS	GPL	MEM	36	1	1	0	140.889	136.47	151.563
PS 18:0;0-18:2;0	PS	GPL	MEM	36	2	2	0	3.57507	3.61607	4.21568
PS 18:0;0-18:3;0	PS	GPL	MEM	36	3	3	0	0	0	0
PS 18:0;0-19:1;0	PS	GPL	MEM	37	1	1	0	0	0	1.74746
PS 18:0;0-19:2;0	PS	GPL	MEM	37	2	2	0	0	0	0
PS 18:0;0-19:3;0	PS	GPL	MEM	37	3	3	0	0	0	0
PS 18:0;0-20:0;0	PS	GPL	MEM	38	0	0	0	0	0	0
PS 18:0;0-20:1;0	PS	GPL	MEM	38	1	1	0	1.85427	1.43846	1.85816
PS 18:0;0-20:2;0	PS	GPL	MEM	38	2	2	0	9.76528	9.33738	9.17339
PS 18:0;0-20:3;0	PS	GPL	MEM	38	3	3	0	26.5912	21.1807	19.59
PS 18:0;0-20:4;0	PS	GPL	MEM	38	4	4	0	0	0	0
PS 18:0;0-20:5;0	PS	GPL	MEM	38	5	5	0	0	0	0
PS 18:0;0-21:3;0	PS	GPL	MEM	39	3	3	0	0	0	0
PS 18:0;0-21:4;0	PS	GPL	MEM	39	4	4	0	0	0	0
PS 18:0;0-22:0;0	PS	GPL	MEM	40	0	0	0	0	0	0
PS 18:0;0-22:1;0	PS	GPL	MEM	40	1	1	0	0	0	0
PS 18:0;0-22:2;0	PS	GPL	MEM	40	2	2	0	0	0	0
PS 18:0;0-22:3;0	PS	GPL	MEM	40	3	3	0	0	0	0
PS 18:0;0-22:4;0	PS	GPL	MEM	40	4	4	0	0	0	0
PS 18:0;0-22:5;0	PS	GPL	MEM	40	5	5	0	0	0	0
PS 18:0;0-22:6;0	PS	GPL	MEM	40	6	6	0	0	0	0
PS 18:0;0-24:1;0	PS	GPL	MEM	42	1	1	0	0	0	0
PS 18:0;0-24:4;0	PS	GPL	MEM	42	4	4	0	0	0	0
PS 18:0;0-24:5;0	PS	GPL	MEM	42	5	5	0	0	0	0
PS 18:0;0-24:6;0	PS	GPL	MEM	42	6	6	0	0	0	0
PS 18:1;0-18:1;0	PS	GPL	MEM	36	2	2	0	18.9937	18.6461	20.8039
PS 18:1;0-18:2;0	PS	GPL	MEM	36	3	3	0	0	2.19397	0
PS 18:1;0-18:3;0	PS	GPL	MEM	36	4	4	0	0	0	0
PS 18:1;0-19:0;0	PS	GPL	MEM	37	1	1	0	3.68552	2.90082	1.86641
PS 18:1;0-19:1;0	PS	GPL	MEM	37	2	2	0	0	0	0
PS 18:1;0-19:2;0	PS	GPL	MEM	37	3	3	0	0	0	0
PS 18:1;0-19:3;0	PS	GPL	MEM	37	4	4	0	0	0	0
PS 18:1;0-20:0;0	PS	GPL	MEM	38	1	1	0	2.04133	2.49257	2.5203
PS 18:1;0-20:1;0	PS	GPL	MEM	38	2	2	0	2.80454	2.71681	2.8945
PS 18:1;0-20:2;0	PS	GPL	MEM	38	3	3	0	33.9916	33.8834	32.8016
PS 18:1;0-20:3;0	PS	GPL	MEM	38	4	4	0	0	0	0
PS 18:1;0-20:4;0	PS	GPL	MEM	38	5	5	0	0	0	0
PS 18:1;0-21:0;0	PS	GPL	MEM	39	1	1	0	0	0	0
PS 18:1;0-21:1;0	PS	GPL	MEM	39	2	2	0	0	0	0
PS 18:1;0-21:2;0	PS	GPL	MEM	39	3	3	0	0	0	0
PS 18:1;0-21:3;0	PS	GPL	MEM	39	4	4	0	0	0	0
PS 18:1;0-22:0;0	PS	GPL	MEM	40	1	1	0	0	0	0
PS 18:1;0-22:1;0	PS	GPL	MEM	40	2	2	0	0	0	0
PS 18:1;0-22:2;0	PS	GPL	MEM	40	3	3	0	0	0	0
PS 18:1;0-22:3;0	PS	GPL	MEM	40	4	4	0	0	0	0
PS 18:1;0-22:4;0	PS	GPL	MEM	40	5	5	0	0	0	0
PS 18:1;0-22:5;0	PS	GPL	MEM	40	6	6	0	0	0	0
PS 18:1;0-22:6;0	PS	GPL	MEM	40	7	7	0	0	0	0
PS 18:1;0-23:0;0	PS	GPL	MEM	41	1	1	0	0	0	0
PS 18:1;0-23:1;0	PS	GPL	MEM	41	2	2	0	0	0	0
PS 18:1;0-24:0;0	PS	GPL	MEM	42	1	1	0	0	0	0
PS 18:1;0-24:1;0	PS	GPL	MEM	42	2	2	0	0	0	0
PS 18:1;0-24:2;0	PS	GPL	MEM	42	3	3	0	0	0	0
PS 18:1;0-24:3;0	PS	GPL	MEM	42	4	4	0	0	0	0
PS 18:1;0-24:4;0	PS	GPL	MEM	42	5	5	0	0	0	0
PS 18:1;0-24:5;0	PS	GPL	MEM	42	6	6	0	0	0	0
PS 18:2;0-18:2;0	PS	GPL	MEM	36	4	4	0	0	0	0
PS 18:2;0-19:0;0	PS	GPL	MEM	37	2	2	0	0	0	0
PS 18:2;0-19:1;0	PS	GPL	MEM	37	3	3	0	0	0	0
PS 18:2;0-20:0;0	PS	GPL	MEM	38	2	2	0	0	0	0
PS 18:2;0-20:1;0	PS	GPL	MEM	38	3	3	0	0	0	0
PS 18:2;0-20:2;0	PS	GPL	MEM	38	4	4	0	0	0	0
PS 18:2;0-20:3;0	PS	GPL	MEM	38	5	5	0	0	0	0
PS 18:2;0-20:4;0	PS	GPL	MEM	38	6	6	0	0	0	0
PS 18:2;0-21:3;0	PS	GPL	MEM	39	5	5	0	0	0	0
PS 18:2;0-22:0;0	PS	GPL	MEM	40	2	2	0	0	0	0
PS 18:2;0-22:1;0	PS	GPL	MEM	40	3	3	0	0	0	0
PS 18:2;0-22:3;0	PS	GPL	MEM	40	5	5	0	0	0	0
PS 18:2;0-22:4;0	PS	GPL	MEM	40	6	6	0	0	0	0
PS 18:2;0-22:5;0	PS	GPL	MEM	40	7	7	0	0	0	0
PS 18:2;0-22:6;0	PS	GPL	MEM	40	8	8	0	0	0	0
PS 18:2;0-24:0;0	PS	GPL	MEM	42	2	2	0	0	0	0
PS 18:2;0-24:1;0	PS	GPL	MEM	42	3	3	0	0	0	0
PS 19:0;0-20:3;0	PS	GPL	MEM	39	3	3	0	0	0	0
PS 19:0;0-20:4;0	PS	GPL	MEM	39	4	4	0	0	0	0
PS 19:0;0-22:5;0	PS	GPL	MEM	41	5	5	0	0	0	0
PS 19:0;0-22:6;0	PS	GPL	MEM	41	6	6	0	0	0	0
PS 19:1;0-19:1;0	PS	GPL	MEM	38	2	2	0	0	0	0
PS 19:1;0-20:2;0	PS	GPL	MEM	39	3	3	0	0	0	0
PS 19:1;0-20:3;0	PS	GPL	MEM	39	4	4	0	0	0	0
PS 19:1;0-20:4;0	PS	GPL	MEM	39	5	5	0	0	0	0
PS 20:0;0-20:3;0	PS	GPL	MEM	40	3	3	0	0	0	0
PS 20:0;0-20:4;0	PS	GPL	MEM	40	4	4	0	0	0	0
PS 20:1;0-20:2;0	PS	GPL	MEM	40	3	3	0	0	0	0
PS 20:1;0-20:3;0	PS	GPL	MEM	40	4	4	0	0	0	0
PS 20:1;0-20:4;0	PS	GPL	MEM	40	5	5	0	0	0	0
PS 20:1;0-22:3;0	PS	GPL	MEM	42	4	4	0	0	0	0
PS 20:2;0-20:2;0	PS	GPL	MEM	40	4	4	0	0	0	0
PS 20:2;0-20:3;0	PS	GPL	MEM	40	5	5	0	0	0	0
PS 20:2;0-20:4;0	PS	GPL	MEM	40	6	6	0	0	0	0
PS 20:2;0-21:3;0	PS	GPL	MEM	41	5	5	0	0	0	0
PS 20:2;0-22:3;0	PS	GPL	MEM	42	5	5	0	0	0	0
PS 20:2;0-22:4;0	PS	GPL	MEM	42	6	6	0	0	0	0
PS 20:3;0-20:3;0	PS	GPL	MEM	40	6	6	0	0	0	0
PS 20:3;0-20:4;0	PS	GPL	MEM	40	7	7	0	0	0	0
PS 20:3;0-21:3;0	PS	GPL	MEM	41	6	6	0	0	0	0
PS 20:3;0-22:0;0	PS	GPL	MEM	42	3	3	0	0	0	0
PS 20:3;0-22:1;0	PS	GPL	MEM	42	4	4	0	0	0	0
PS 20:3;0-22:2;0	PS	GPL	MEM	42	5	5	0	0	0	0
PS 20:3;0-22:3;0	PS	GPL	MEM	42	6	6	0	0	0	0
PS 20:4;0-20:4;0	PS	GPL	MEM	40	8	8	0	0	0	0
PS 20:4;0-22:0;0	PS	GPL	MEM	42	4	4	0	0	0	0
PS 20:4;0-22:1;0	PS	GPL	MEM	42	5	5	0	0	0	0
PS 20:4;0-22:5;0	PS	GPL	MEM	42	9	9	0	0	0	0
PS 20:4;0-22:6;0	PS	GPL	MEM	42	10	10	0	0	0	0
SM 32:1;2	SM	SL	MEM	32	1	0	2	0	0	0.454728
SM 34:0;2	SM	SL	MEM	34	0	0	2	1.86569	1.71284	1.91366
SM 34:1;2	SM	SL	MEM	34	1	0	2	23.2192	21.2755	24.5668
SM 34:2;2	SM	SL	MEM	34	2	1	2	0	0	0.46896
SM 36:0;2	SM	SL	MEM	36	0	0	2	0	0	0
SM 36:0;3	SM	SL	MEM	36	0	0	3	0	0	0.492647
SM 36:0;4	SM	SL	MEM	36	0	0	4	0	0	0
SM 36:1;2	SM	SL	MEM	36	1	0	2	1.99012	1.99245	2.27146
SM 36:2;2	SM	SL	MEM	36	2	1	2	0	0	0
SM 38:0;2	SM	SL	MEM	38	0	0	2	0	0	0
SM 38:1;2	SM	SL	MEM	38	1	0	2	1.69999	1.57982	1.67453
SM 38:2;2	SM	SL	MEM	38	2	1	2	0	0	0
SM 40:0;2	SM	SL	MEM	40	0	0	2	0	0	0
SM 40:1;2	SM	SL	MEM	40	1	0	2	2.50473	2.31268	2.5512
SM 40:2;2	SM	SL	MEM	40	2	1	2	0	0.490785	0.541894
SM 42:0;2	SM	SL	MEM	42	0	0	2	0	0	0
SM 42:0;3	SM	SL	MEM	42	0	0	3	0	0	0
SM 42:1;2	SM	SL	MEM	42	1	0	2	5.76258	4.8804	5.35862
SM 42:1;3	SM	SL	MEM	42	1	0	3	0	0	0
SM 42:2;2	SM	SL	MEM	42	2	1	2	8.27724	7.50819	8.81329
SM 44:2;2	SM	SL	MEM	44	2	1	2	0	0	0
TAG 34:0;0	TAG	GL	STO	34	0	0	0	0	0	0
TAG 36:0;0	TAG	GL	STO	36	0	0	0	0	0	0
TAG 36:1;0	TAG	GL	STO	36	1	1	0	0	0	0
TAG 37:0;0	TAG	GL	STO	37	0	0	0	0	0	0
TAG 40:0;0	TAG	GL	STO	40	0	0	0	0	0	0
TAG 40:1;0	TAG	GL	STO	40	1	1	0	0	0	0
TAG 42:0;0	TAG	GL	STO	42	0	0	0	0	0	0
TAG 42:1;0	TAG	GL	STO	42	1	1	0	0	0	0
TAG 44:0;0	TAG	GL	STO	44	0	0	0	0	0	0
TAG 44:1;0	TAG	GL	STO	44	1	1	0	0	0	0
TAG 45:0;0	TAG	GL	STO	45	0	0	0	0	0	0
TAG 45:1;0	TAG	GL	STO	45	1	1	0	0	0	0
TAG 46:0;0	TAG	GL	STO	46	0	0	0	0	0	0
TAG 46:1;0	TAG	GL	STO	46	1	1	0	0	0	0
TAG 46:2;0	TAG	GL	STO	46	2	2	0	0	0	0
TAG 47:0;0	TAG	GL	STO	47	0	0	0	0	0	0
TAG 47:1;0	TAG	GL	STO	47	1	1	0	0	0	0
TAG 47:2;0	TAG	GL	STO	47	2	2	0	0	0	0
TAG 48:0;0	TAG	GL	STO	48	0	0	0	2.25006	1.86948	2.59915
TAG 48:1;0	TAG	GL	STO	48	1	1	0	4.94899	4.17417	4.37074
TAG 48:2;0	TAG	GL	STO	48	2	2	0	2.98633	2.00997	3.04529
TAG 48:3;0	TAG	GL	STO	48	3	3	0	0	0	0
TAG 49:0;0	TAG	GL	STO	49	0	0	0	0	0	0
TAG 49:1;0	TAG	GL	STO	49	1	1	0	0	0	0
TAG 49:2;0	TAG	GL	STO	49	2	2	0	0	0	0
TAG 50:0;0	TAG	GL	STO	50	0	0	0	2.67515	2.94044	2.87087
TAG 50:1;0	TAG	GL	STO	50	1	1	0	11.577	11.9484	11.6935
TAG 50:2;0	TAG	GL	STO	50	2	2	0	16.3789	15.4459	17.2387
TAG 50:3;0	TAG	GL	STO	50	3	3	0	5.03878	4.78843	4.96325
TAG 51:1;0	TAG	GL	STO	51	1	1	0	0	0	0
TAG 51:2;0	TAG	GL	STO	51	2	2	0	3.68412	2.81942	3.03598
TAG 51:3;0	TAG	GL	STO	51	3	3	0	0	0	0
TAG 52:0;0	TAG	GL	STO	52	0	0	0	0	0	0
TAG 52:1;0	TAG	GL	STO	52	1	1	0	0	0	0
TAG 52:2;0	TAG	GL	STO	52	2	2	0	48.1869	46.8919	48.9233
TAG 52:3;0	TAG	GL	STO	52	3	3	0	21.6394	21.1986	22.8908
TAG 52:4;0	TAG	GL	STO	52	4	4	0	3.25121	2.77019	3.16403
TAG 52:5;0	TAG	GL	STO	52	5	5	0	0	0	0
TAG 53:1;0	TAG	GL	STO	53	1	1	0	0	0	0
TAG 53:2;0	TAG	GL	STO	53	2	2	0	4.68089	4.06789	5.67552
TAG 53:3;0	TAG	GL	STO	53	3	3	0	3.93178	3.52744	3.59178
TAG 54:0;0	TAG	GL	STO	54	0	0	0	0	0	0
TAG 54:1;0	TAG	GL	STO	54	1	1	0	2.01817	0	1.38043
TAG 54:2;0	TAG	GL	STO	54	2	2	0	25.1592	23.8946	24.7403
TAG 54:3;0	TAG	GL	STO	54	3	3	0	54.869	53.4315	59.6143
TAG 54:4;0	TAG	GL	STO	54	4	4	0	8.35834	7.4371	9.44082
TAG 54:5;0	TAG	GL	STO	54	5	5	0	0	0	0
TAG 54:6;0	TAG	GL	STO	54	6	6	0	0	0	0
TAG 55:2;0	TAG	GL	STO	55	2	2	0	1.5964	0	0
TAG 55:3;0	TAG	GL	STO	55	3	3	0	2.421	2.65532	2.26392
TAG 55:4;0	TAG	GL	STO	55	4	4	0	0	0	0
TAG 56:1;0	TAG	GL	STO	56	1	1	0	0	0	0
TAG 56:2;0	TAG	GL	STO	56	2	2	0	0	0	5.28092
TAG 56:3;0	TAG	GL	STO	56	3	3	0	12.1587	11.9835	12.0499
TAG 56:4;0	TAG	GL	STO	56	4	4	0	12.8986	12.8712	13.8632
TAG 56:5;0	TAG	GL	STO	56	5	5	0	1.90548	1.68445	1.42233
TAG 56:6;0	TAG	GL	STO	56	6	6	0	0	0	0
TAG 56:7;0	TAG	GL	STO	56	7	7	0	1.4017	0	0
TAG 57:3;0	TAG	GL	STO	57	3	3	0	0	0	0
TAG 58:1;0	TAG	GL	STO	58	1	1	0	0	0	0
TAG 58:2;0	TAG	GL	STO	58	2	2	0	0	0	0
TAG 58:3;0	TAG	GL	STO	58	3	3	0	2.14051	1.60662	2.5371
TAG 58:4;0	TAG	GL	STO	58	4	4	0	1.71475	1.8396	1.9964
TAG 58:5;0	TAG	GL	STO	58	5	5	0	0	0	0
TAG 58:7;0	TAG	GL	STO	58	7	7	0	0	0	0
TAG 58:8;0	TAG	GL	STO	58	8	8	0	0	0	0
TAG 60:2;0	TAG	GL	STO	60	2	2	0	0	0	0
TAG 60:3;0	TAG	GL	STO	60	3	3	0	0	0	0

## Sheet: CHO - 20160114
Jin Cho-20160114-CHO CM and GPMV whole cells
pM of lipids
feature	class	structuralcategory	functio0lcategory	class	totallength	totaldb	dbcorr	totaloh	JC1_DMSO1CM_DMSO1CM	JC2_DMSO2CM_DMSO2CM	JC3_DMSO3CM_DMSO3CM		JC10_DMSO1GPMV_DMSO1GPMV	JC11_DMSO2GPMV_DMSO2GPMV	JC12_DMSO3GMPV_DMSO3GMPV
CL-62:7;0	CL	GPL	MEM	CL	62	7	7	0	0	0	0		0	0	0
CL-64:2;0	CL	GPL	MEM	CL	64	2	2	0	0	0	0		0	0	0
CL-64:3;0	CL	GPL	MEM	CL	64	3	3	0	0	0	0		0	0	0
CL-64:4;0	CL	GPL	MEM	CL	64	4	4	0	0	0	0		0	0	0
CL-64:7;0	CL	GPL	MEM	CL	64	7	7	0	0	0	0		0	0	0
CL-66:2;0	CL	GPL	MEM	CL	66	2	2	0	0	0	0		0	0	0
CL-66:3;0	CL	GPL	MEM	CL	66	3	3	0	0	0	0		0	0	0
CL-66:4;0	CL	GPL	MEM	CL	66	4	4	0	0	0	0		0	0	0
CL-66:5;0	CL	GPL	MEM	CL	66	5	5	0	0	0	0		0	0	0
CL-68:2;0	CL	GPL	MEM	CL	68	2	2	0	0	0	0		0	0	0
CL-68:4;0	CL	GPL	MEM	CL	68	4	4	0	2.07454	1.8377	1.61995		0	0	0
CL-68:5;0	CL	GPL	MEM	CL	68	5	5	0	0.384435	0.326634	0.4563		0	0	0
CL-68:6;0	CL	GPL	MEM	CL	68	6	6	0	0	0	0		0	0	0
CL-70:4;0	CL	GPL	MEM	CL	70	4	4	0	3.7528	3.37994	3.85268		0	0	0
CL-70:5;0	CL	GPL	MEM	CL	70	5	5	0	2.72082	2.25711	1.94437		0	0	0
CL-70:6;0	CL	GPL	MEM	CL	70	6	6	0	0	0	0		0	0	0
CL-70:7;0	CL	GPL	MEM	CL	70	7	7	0	0	0	0		0	0	0
CL-72:17;0	CL	GPL	MEM	CL	72	17	17	0	4.77752	0	0		0	0	0
CL-72:4;0	CL	GPL	MEM	CL	72	4	4	0	1.9633	1.41881	1.57183		0	0	0
CL-72:5;0	CL	GPL	MEM	CL	72	5	5	0	2.8124	2.53015	2.6215		0	0.680002	0
CL-72:6;0	CL	GPL	MEM	CL	72	6	6	0	1.09033	1.04907	1.02769		0	0	0
CL-72:7;0	CL	GPL	MEM	CL	72	7	7	0	0	0	0		0	0	0
CL-74:8;0	CL	GPL	MEM	CL	74	8	8	0	0	0	0		0	0	0
CL-74:9;0	CL	GPL	MEM	CL	74	9	9	0	0	0	0		0	0	0
CL-76:10;0	CL	GPL	MEM	CL	76	10	10	0	0	0	0		0	0	0
CL-76:11;0	CL	GPL	MEM	CL	76	11	11	0	0	0	0		0	0	0
CL-76:8;0	CL	GPL	MEM	CL	76	8	8	0	0	0	0		0	0	0
Cer-32:0;2	Cer	SL	MEM	Cer	32	0	0	2	0	0	0		0	0	0
Cer-32:1;2	Cer	SL	MEM	Cer	32	1	1	2	0.189231	0.213646	0.196419		0	0	0
Cer-32:1;4	Cer	SL	MEM	Cer	32	1	1	4	0	0	0		0	0	0
Cer-32:2;2	Cer	SL	MEM	Cer	32	2	2	2	0	0	0		0	0	0
Cer-34:0;2	Cer	SL	MEM	Cer	34	0	0	2	1.4484	1.60054	1.44908		2.41908	2.01563	3.24456
Cer-34:0;3	Cer	SL	MEM	Cer	34	0	0	3	0	0.099094	0		0	0	0
Cer-34:1;2	Cer	SL	MEM	Cer	34	1	1	2	6.27421	7.22837	6.16964		4.95559	4.70517	5.62233
Cer-34:1;3	Cer	SL	MEM	Cer	34	1	1	3	0	0	0		0	0	0
Cer-34:2;2	Cer	SL	MEM	Cer	34	2	2	2	0.222284	0.225951	0.193871		0.14318	0.135538	0.14379
Cer-34:2;3	Cer	SL	MEM	Cer	34	2	2	3	0	0	0		0	0	0
Cer-36:0;2	Cer	SL	MEM	Cer	36	0	0	2	0.25741	0.225912	0.246728		0.389738	0.353295	0.508514
Cer-36:1;2	Cer	SL	MEM	Cer	36	1	1	2	0.753289	0.826874	0.657337		0.478814	0.432025	0.544789
Cer-36:2;2	Cer	SL	MEM	Cer	36	2	2	2	0	0	0		0	0	0
Cer-36:2;3	Cer	SL	MEM	Cer	36	2	2	3	0	0	0		0	0	0
Cer-38:0;2	Cer	SL	MEM	Cer	38	0	0	2	0.233579	0.253312	0.184514		0.456227	0.420687	0.450423
Cer-38:0;3	Cer	SL	MEM	Cer	38	0	0	3	0	0	0		0	0	0
Cer-38:1;2	Cer	SL	MEM	Cer	38	1	1	2	0.590995	0.610728	0.488116		0.431155	0.390363	0.503005
Cer-38:2;2	Cer	SL	MEM	Cer	38	2	2	2	0	0	0		0	0	0
Cer-40:0;2	Cer	SL	MEM	Cer	40	0	0	2	0.205764	0.18386	0.185619		0.536216	0.454003	0.58574
Cer-40:0;3	Cer	SL	MEM	Cer	40	0	0	3	0	0	0		0	0	0
Cer-40:1;2	Cer	SL	MEM	Cer	40	1	1	2	1.13028	1.36351	1.06929		0.737962	0.680444	0.801241
Cer-40:1;3	Cer	SL	MEM	Cer	40	1	1	3	0	0	0		0	0	0
Cer-40:2;2	Cer	SL	MEM	Cer	40	2	2	2	0.372063	0.378118	0.305176		0.133639	0	0.137029
Cer-42:0;2	Cer	SL	MEM	Cer	42	0	0	2	0	0	0		0.452808	0.556741	0.585897
Cer-42:0;3	Cer	SL	MEM	Cer	42	0	0	3	0.310809	0.344068	0.273009		0.305322	0.349922	0.383686
Cer-42:1;2	Cer	SL	MEM	Cer	42	1	1	2	4.60747	5.75554	4.29103		2.72972	2.40421	3.02807
Cer-42:1;3	Cer	SL	MEM	Cer	42	1	1	3	0.385503	0.449479	0.307225		0.294124	0.295271	0.350286
Cer-42:2;2	Cer	SL	MEM	Cer	42	2	2	2	5.16722	6.35482	5.11553		2.10494	1.70668	2.02005
Cer-42:2;3	Cer	SL	MEM	Cer	42	2	2	3	0	0	0		0	0	0
Cer-44:0;2	Cer	SL	MEM	Cer	44	0	0	2	0	0	0		0	0	0
Cer-44:0;3	Cer	SL	MEM	Cer	44	0	0	3	0	0	0		0	0	0
Cer-44:1;2	Cer	SL	MEM	Cer	44	1	1	2	0.301979	0.379084	0.278556		0.203221	0.15762	0.23601
Cer-44:1;3	Cer	SL	MEM	Cer	44	1	1	3	0	0	0		0	0	0
Cer-44:2;2	Cer	SL	MEM	Cer	44	2	2	2	0.497347	0.545148	0.428245		0.207934	0.129631	0.183455
DAG-30:0;0(12:0;0-18:0;0)	DAG	GL	MEM	DAG	30	0	0	0	0	0	0		0	0	0
DAG-30:0;0(14:0;0-16:0;0)	DAG	GL	MEM	DAG	30	0	0	0	0	0	0		0	0	0
DAG-30:0;0(15:0;0-15:0;0)	DAG	GL	MEM	DAG	30	0	0	0	0	0	0		0	0	0
DAG-30:1;0(12:0;0-18:1;0)	DAG	GL	MEM	DAG	30	1	1	0	5.77887	0	0		0	0	0
DAG-30:1;0(14:0;0-16:1;0)	DAG	GL	MEM	DAG	30	1	1	0	2.05059	6.95005	6.8554		7.19156	6.44537	6.71409
DAG-30:1;0(14:1;0-16:0;0)	DAG	GL	MEM	DAG	30	1	1	0	0	0	0		0	0	0
DAG-31:0;0(14:0;0-17:0;0)	DAG	GL	MEM	DAG	31	0	0	0	0	0	0		0	0	0
DAG-31:0;0(15:0;0-16:0;0)	DAG	GL	MEM	DAG	31	0	0	0	0	0	0		0	0	0
DAG-31:1;0(13:0;0-18:1;0)	DAG	GL	MEM	DAG	31	1	1	0	0	0	0		0	0	0
DAG-31:1;0(14:0;0-17:1;0)	DAG	GL	MEM	DAG	31	1	1	0	0	0	0		0	0	0
DAG-31:1;0(15:0;0-16:1;0)	DAG	GL	MEM	DAG	31	1	1	0	0	0	0		0	0	0
DAG-32:0;0(14:0;0-18:0;0)	DAG	GL	MEM	DAG	32	0	0	0	0.394655	0.34473	0.368867		0	0.360271	0.551462
DAG-32:0;0(15:0;0-17:0;0)	DAG	GL	MEM	DAG	32	0	0	0	0.363802	0.295366	0.311819		0	0.137724	0
DAG-32:0;0(16:0;0-16:0;0)	DAG	GL	MEM	DAG	32	0	0	0	4.73699	3.88165	4.37976		3.2553	0	3.73752
DAG-32:1;0(14:0;0-18:1;0)	DAG	GL	MEM	DAG	32	1	1	0	1.44379	1.46618	1.19448		0.997998	1.04643	1.11846
DAG-32:1;0(14:1;0-18:0;0)	DAG	GL	MEM	DAG	32	1	1	0	0	0	0		0	0	0
DAG-32:1;0(15:0;0-17:1;0)	DAG	GL	MEM	DAG	32	1	1	0	0.264161	0.299162	0.231684		0.205021	0.16409	0.20614
DAG-32:1;0(16:1;0-16:0;0)	DAG	GL	MEM	DAG	32	1	1	0	3.30198	3.70737	3.08464		3.29941	3.20028	3.60168
DAG-32:2;0(14:0;0-18:2;0)	DAG	GL	MEM	DAG	32	2	2	0	0	0	0		0	0	0
DAG-32:2;0(14:1;0-18:1;0)	DAG	GL	MEM	DAG	32	2	2	0	0	0	0		0	0	0
DAG-32:2;0(16:1;0-16:1;0)	DAG	GL	MEM	DAG	32	2	2	0	0	0	0		0	0	0
DAG-32:3;0(15:2;0-17:1;0)	DAG	GL	MEM	DAG	32	3	3	0	0	0	0		0	8.0193	0
DAG-33:0;0(15:0;0-18:0;0)	DAG	GL	MEM	DAG	33	0	0	0	0	0	0		0	0	0
DAG-33:0;0(16:0;0-17:0;0)	DAG	GL	MEM	DAG	33	0	0	0	0	0	0		0	0	0
DAG-33:1;0(15:0;0-18:1;0)	DAG	GL	MEM	DAG	33	1	1	0	0.767496	0.63034	0.907034		0.740524	0.636218	0.956535
DAG-33:1;0(16:0;0-17:1;0)	DAG	GL	MEM	DAG	33	1	1	0	3.17152	2.74731	3.96492		2.73426	2.26767	3.46319
DAG-33:1;0(16:1;0-17:0;0)	DAG	GL	MEM	DAG	33	1	1	0	0.257193	0.217641	0.314188		0.264709	0.196093	0.332216
DAG-34:0;0(16:0;0-18:0;0)	DAG	GL	MEM	DAG	34	0	0	0	10.3085	10.8846	10.1978		18.9029	14.5364	18.4564
DAG-34:1;0(14:0;0-20:1;0)	DAG	GL	MEM	DAG	34	1	1	0	0	0.086405	0.081574		0	0	0
DAG-34:1;0(16:0;0-18:1;0)	DAG	GL	MEM	DAG	34	1	1	0	29.3709	25.9058	24.4794		30.5602	27.1146	33.0366
DAG-34:1;0(16:1;0-18:0;0)	DAG	GL	MEM	DAG	34	1	1	0	0.968688	0.845901	0.802488		0.972053	0.756713	1.07679
DAG-34:1;0(17:1;0-17:0;0)	DAG	GL	MEM	DAG	34	1	1	0	0.706619	0.602312	0.635537		0.405067	0.381801	0.419314
DAG-34:2;0(14:0;0-20:2;0)	DAG	GL	MEM	DAG	34	2	2	0	0	0	0		0	0	0
DAG-34:2;0(16:0;0-18:2;0)	DAG	GL	MEM	DAG	34	2	2	0	1.01853	0.685883	0.699889		1.02817	1.9207	1.11262
DAG-34:2;0(16:1;0-18:1;0)	DAG	GL	MEM	DAG	34	2	2	0	4.92613	4.53034	4.28206		3.13808	3.99487	3.10335
DAG-34:2;0(17:1;0-17:1;0)	DAG	GL	MEM	DAG	34	2	2	0	0.147872	0.154772	0.168295		0.141032	0.157827	0.107536
DAG-34:3;0(16:0;0-18:3;0)	DAG	GL	MEM	DAG	34	3	3	0	0	0	0		0	0	0
DAG-34:3;0(16:1;0-18:2;0)	DAG	GL	MEM	DAG	34	3	3	0	0	0	0		0	0	0
DAG-35:1;0(16:0;0-19:1;0)	DAG	GL	MEM	DAG	35	1	1	0	0.3473	0.312781	0.477916		0.258409	0	0.29968
DAG-35:1;0(17:0;0-18:1;0)	DAG	GL	MEM	DAG	35	1	1	0	1.91434	1.82469	3.01651		2.0723	0	2.49803
DAG-35:1;0(17:1;0-18:0;0)	DAG	GL	MEM	DAG	35	1	1	0	0.203821	0.207953	0.35468		0.175	0	0
DAG-35:2;0(16:0;0-19:2;0)	DAG	GL	MEM	DAG	35	2	2	0	0	0	0		0	0	0
DAG-35:2;0(16:1;0-19:1;0)	DAG	GL	MEM	DAG	35	2	2	0	0	0	0		0	0	0
DAG-35:2;0(17:0;0-18:2;0)	DAG	GL	MEM	DAG	35	2	2	0	0	0	0		0	0	0
DAG-35:2;0(17:1;0-18:1;0)	DAG	GL	MEM	DAG	35	2	2	0	10.7059	7.56743	6.3541		5.99216	8.69385	6.9696
DAG-36:0;0(18:0;0-18:0;0)	DAG	GL	MEM	DAG	36	0	0	0	0	0	0		34.2622	26.4849	36.1602
DAG-36:1;0(16:0;0-20:1;0)	DAG	GL	MEM	DAG	36	1	1	0	1.02188	1.08094	1.01705		1.03176	0.858417	1.28791
DAG-36:1;0(18:1;0-18:0;0)	DAG	GL	MEM	DAG	36	1	1	0	5.70045	5.14129	4.81193		7.23319	6.49817	8.85853
DAG-36:2;0(16:0;0-20:2;0)	DAG	GL	MEM	DAG	36	2	2	0	0.610893	0.62988	0.585226		0.47217	0.388283	0.54423
DAG-36:2;0(16:1;0-20:1;0)	DAG	GL	MEM	DAG	36	2	2	0	0.407835	0.329987	0.352314		0	0	0
DAG-36:2;0(18:1;0-18:1;0)	DAG	GL	MEM	DAG	36	2	2	0	26.0226	22.0632	20.4836		16.9693	17.1872	17.1902
DAG-36:2;0(18:2;0-18:0;0)	DAG	GL	MEM	DAG	36	2	2	0	0.33488	0.17596	0.16732		0.556512	0.597444	0.548587
DAG-36:3;0(16:0;0-20:3;0)	DAG	GL	MEM	DAG	36	3	3	0	0.157272	0	0		0.632633	0.525845	0.657051
DAG-36:3;0(16:1;0-20:2;0)	DAG	GL	MEM	DAG	36	3	3	0	0.109266	0	0		0	0	0
DAG-36:3;0(18:2;0-18:1;0)	DAG	GL	MEM	DAG	36	3	3	0	1.80146	0	0		0.996979	3.21163	1.16348
DAG-36:3;0(18:3;0-18:0;0)	DAG	GL	MEM	DAG	36	3	3	0	0	0	0		0	0	0
DAG-36:4;0(16:0;0-20:4;0)	DAG	GL	MEM	DAG	36	4	4	0	0	0	0		0	0	0
DAG-36:4;0(18:2;0-18:2;0)	DAG	GL	MEM	DAG	36	4	4	0	0	0	0		0	0	0
DAG-36:4;0(18:3;0-18:1;0)	DAG	GL	MEM	DAG	36	4	4	0	0	0	0		0	0	0
DAG-37:1;0(17:0;0-20:1;0)	DAG	GL	MEM	DAG	37	1	1	0	2.87214	2.55671	0		0	0	0
DAG-37:1;0(18:0;0-19:1;0)	DAG	GL	MEM	DAG	37	1	1	0	0	0	0		0	0	0
DAG-37:1;0(18:1;0-19:0;0)	DAG	GL	MEM	DAG	37	1	1	0	3.70455	3.57169	13.046		8.54916	5.62302	5.8576
DAG-37:2;0(17:1;0-20:1;0)	DAG	GL	MEM	DAG	37	2	2	0	0	1.35747	0		0	0	0
DAG-37:2;0(18:1;0-19:1;0)	DAG	GL	MEM	DAG	37	2	2	0	6.16027	3.23004	3.48899		3.73223	6.05806	4.78391
DAG-38:1;0(16:0;0-22:1;0)	DAG	GL	MEM	DAG	38	1	1	0	2.46787	0.734725	1.28199		0	0	6.58447
DAG-38:1;0(18:0;0-20:1;0)	DAG	GL	MEM	DAG	38	1	1	0	0	0.961542	1.97596		0	0	0
DAG-38:2;0(18:0;0-20:2;0)	DAG	GL	MEM	DAG	38	2	2	0	1.2796	0.919395	1.61406		2.09252	2.63847	0.938287
DAG-38:2;0(18:1;0-20:1;0)	DAG	GL	MEM	DAG	38	2	2	0	3.50921	3.09638	4.76182		5.46775	8.62865	2.32989
DAG-38:3;0(18:0;0-20:3;0)	DAG	GL	MEM	DAG	38	3	3	0	0	0	0		0	0	0
DAG-38:3;0(18:1;0-20:2;0)	DAG	GL	MEM	DAG	38	3	3	0	0	0	0		0	0	0
DAG-38:4;0(16:0;0-22:4;0)	DAG	GL	MEM	DAG	38	4	4	0	0	0	0		0	0	0
DAG-38:4;0(18:0;0-20:4;0)	DAG	GL	MEM	DAG	38	4	4	0	0	0	0		0	0	0
DAG-38:4;0(18:1;0-20:3;0)	DAG	GL	MEM	DAG	38	4	4	0	0	0	0		0	0	0
DAG-38:5;0(16:0;0-22:5;0)	DAG	GL	MEM	DAG	38	5	5	0	0	0	0		0	0	0
DAG-38:5;0(16:1;0-22:4;0)	DAG	GL	MEM	DAG	38	5	5	0	0	0	0		0	0	0
DAG-38:5;0(18:0;0-20:5;0)	DAG	GL	MEM	DAG	38	5	5	0	0	0	0		0	0	0
DAG-38:5;0(18:1;0-20:4;0)	DAG	GL	MEM	DAG	38	5	5	0	0	0	0		0	0	0
DAG-38:5;0(18:2;0-20:3;0)	DAG	GL	MEM	DAG	38	5	5	0	0	0	0		0	0	0
DAG-38:6;0(16:0;0-22:6;0)	DAG	GL	MEM	DAG	38	6	6	0	0	0	0		0	0	0
DAG-38:6;0(16:1;0-22:5;0)	DAG	GL	MEM	DAG	38	6	6	0	0	0	0		0	0	0
DAG-38:6;0(18:2;0-20:4;0)	DAG	GL	MEM	DAG	38	6	6	0	0	0	0		0	0	0
DAG-40:1;0(16:0;0-24:1;0)	DAG	GL	MEM	DAG	40	1	1	0	0	0	0		0	0	0
DAG-40:1;0(18:1;0-22:0;0)	DAG	GL	MEM	DAG	40	1	1	0	0	0	0		0	0	4.63729
DAG-40:4;0(18:0;0-22:4;0)	DAG	GL	MEM	DAG	40	4	4	0	0	0	0		0	0	0
DAG-40:5;0(18:0;0-22:5;0)	DAG	GL	MEM	DAG	40	5	5	0	0	0	0		0	0	0
DAG-40:5;0(18:1;0-22:4;0)	DAG	GL	MEM	DAG	40	5	5	0	0	0	0		0	0	0
DAG-40:6;0(18:0;0-22:6;0)	DAG	GL	MEM	DAG	40	6	6	0	0	0	0		0	0	0
DAG-40:6;0(18:1;0-22:5;0)	DAG	GL	MEM	DAG	40	6	6	0	0	0	0		0	0	0
DAG-42:2;0(18:1;0-24:1;0)	DAG	GL	MEM	DAG	42	2	2	0	0	0	0		0	0	0
HexCer-30:2;2	HexCer	SL	MEM	HexCer	30	2	2	2	0	0	0		0	0	0.20936
HexCer-34:0;2	HexCer	SL	MEM	HexCer	34	0	0	2	0	0	0		0	0	0
HexCer-34:0;3	HexCer	SL	MEM	HexCer	34	0	0	3	0	0	0		0	0	0
HexCer-34:1;2	HexCer	SL	MEM	HexCer	34	1	1	2	5.90171	5.93005	4.50276		11.898	10.6579	12.7696
HexCer-36:0;2	HexCer	SL	MEM	HexCer	36	0	0	2	0	0	0		0	0	0
HexCer-36:1;2	HexCer	SL	MEM	HexCer	36	1	1	2	0.770934	0.71636	0.577054		1.05277	0.978023	1.11526
HexCer-38:0;2	HexCer	SL	MEM	HexCer	38	0	0	2	0	0	0		0	0	0
HexCer-38:1;2	HexCer	SL	MEM	HexCer	38	1	1	2	0.83722	0.86245	0.644523		1.50091	1.30236	1.57206
HexCer-38:2;2	HexCer	SL	MEM	HexCer	38	2	2	2	0	0	0		0	0	0
HexCer-40:0;2	HexCer	SL	MEM	HexCer	40	0	0	2	0	0	0		0	0	0
HexCer-40:0;3	HexCer	SL	MEM	HexCer	40	0	0	3	0	0	0		0	0	0
HexCer-40:1;2	HexCer	SL	MEM	HexCer	40	1	1	2	1.40368	1.4865	1.09108		2.31399	2.15128	2.76463
HexCer-40:2;2	HexCer	SL	MEM	HexCer	40	2	2	2	0	0	0		0	0	0
HexCer-42:0;2	HexCer	SL	MEM	HexCer	42	0	0	2	0	0	0		0	0	0
HexCer-42:1;2	HexCer	SL	MEM	HexCer	42	1	1	2	2.69289	2.90583	0		5.16934	4.36133	5.00929
HexCer-42:1;3	HexCer	SL	MEM	HexCer	42	1	1	3	2.21213	2.01196	1.59267		5.0215	4.58132	5.61762
HexCer-42:2;2	HexCer	SL	MEM	HexCer	42	2	2	2	2.5644	2.47822	2.02763		3.2167	2.66041	3.41637
HexCer-42:2;3	HexCer	SL	MEM	HexCer	42	2	2	3	0.265247	0.187647	0.216482		0.592361	0.563093	0.712484
HexCer-44:0;3	HexCer	SL	MEM	HexCer	44	0	0	3	0	0	0		0	0	0
HexCer-44:1;3	HexCer	SL	MEM	HexCer	44	1	1	3	0	0	0		0.516994	0.465767	0.56569
HexCer-44:2;2	HexCer	SL	MEM	HexCer	44	2	2	2	0.251191	0.330204	0.209236		0.325505	0.300267	0.337964
LPA-16:0;0(16:0;0)	LPA	GPL	LYS	LPA	16	0	0	0	0.167143	0.172464	0		0.228605	0.180485	0.277265
LPA-16:3;0(16:3;0)	LPA	GPL	LYS	LPA	16	3	3	0	0	0	0		0	0	0.37952
LPA-18:0;0(18:0;0)	LPA	GPL	LYS	LPA	18	0	0	0	0	0	0		0	0	0
LPA-18:1;0(18:1;0)	LPA	GPL	LYS	LPA	18	1	1	0	0.1875	0.188838	0		1.83768	1.32564	1.86302
LPA-18:2;0(18:2;0)	LPA	GPL	LYS	LPA	18	2	2	0	0	0	0		0	0	0
LPA-18:3;0(18:3;0)	LPA	GPL	LYS	LPA	18	3	3	0	0	0	0		0	0	0
LPA-18:4;0(18:4;0)	LPA	GPL	LYS	LPA	18	4	4	0	0	0	0		0	0	0
LPA-20:1;0(20:1;0)	LPA	GPL	LYS	LPA	20	1	1	0	0	0	0		0	0	0
LPA-20:2;0(20:2;0)	LPA	GPL	LYS	LPA	20	2	2	0	0	0	0		0	0.439998	0
LPA-20:3;0(20:3;0)	LPA	GPL	LYS	LPA	20	3	3	0	0	0	0		0	0	0
LPA-20:4;0(20:4;0)	LPA	GPL	LYS	LPA	20	4	4	0	0	0	0		0	0	0
LPA-22:4;0(22:4;0)	LPA	GPL	LYS	LPA	22	4	4	0	0	0	0		0	0	0
LPA-22:5;0(22:5;0)	LPA	GPL	LYS	LPA	22	5	5	0	0	0	0		0	0	0
LPA-22:6;0(22:6;0)	LPA	GPL	LYS	LPA	22	6	6	0	0	0	0		0	0	0
LPC-14:0;0(14:0;0)	LPC	GPL	LYS	LPC	14	0	0	0	0	0	0		0.335767	0.323402	0.383612
LPC-14:1;0(14:1;0)	LPC	GPL	LYS	LPC	14	1	1	0	0	0	0		0.241598	0	0
LPC-14:2;0(14:2;0)	LPC	GPL	LYS	LPC	14	2	2	0	0	0	0		0.403953	0	0.331887
LPC-16:0;0(16:0;0)	LPC	GPL	LYS	LPC	16	0	0	0	4.14922	4.43617	3.05161		13.3499	12.6167	15.4779
LPC-16:1;0(16:1;0)	LPC	GPL	LYS	LPC	16	1	1	0	0.424463	0.537017	0.302324		1.08814	1.05312	0.958565
LPC-18:0;0(18:0;0)	LPC	GPL	LYS	LPC	18	0	0	0	0.574868	0.531398	0.419802		2.44849	2.69198	3.48138
LPC-18:1;0(18:1;0)	LPC	GPL	LYS	LPC	18	1	1	0	3.02808	3.28741	2.05478		11.2946	11.2015	12.1833
LPC-18:2;0(18:2;0)	LPC	GPL	LYS	LPC	18	2	2	0	0	0	0		0.222819	0.286339	0
LPC-20:0;0(20:0;0)	LPC	GPL	LYS	LPC	20	0	0	0	0	0	0		0	0	0
LPC-20:1;0(20:1;0)	LPC	GPL	LYS	LPC	20	1	1	0	0	0	0		0.466174	0.475806	0.546416
LPC-20:3;0(20:3;0)	LPC	GPL	LYS	LPC	20	3	3	0	0	0	0		0	0	0
LPC-20:4;0(20:4;0)	LPC	GPL	LYS	LPC	20	4	4	0	0	0	0		0	0	0
LPC-22:4;0(22:4;0)	LPC	GPL	LYS	LPC	22	4	4	0	0	0	0		0	0	0
LPC-22:6;0(22:6;0)	LPC	GPL	LYS	LPC	22	6	6	0	0	0	0		0	0	0
LPC O--16:0;0(16:0;0)	LPC O-	GPL	LYS	LPC O-	16	0	0	0	0.867588	0.97002	0.6578		2.2624	2.05557	2.64555
LPC O--16:1;0(16:1;0)	LPC O-	GPL	LYS	LPC O-	16	1	0	0	0	0	0		0.512463	0.446107	0.566533
LPC O--18:0;0(18:0;0)	LPC O-	GPL	LYS	LPC O-	18	0	0	0	0.628126	0.540803	0.433928		2.27586	2.34353	2.98689
LPC O--18:1;0(18:1;0)	LPC O-	GPL	LYS	LPC O-	18	1	0	0	2.06199	1.82873	1.49575		3.56968	3.24777	3.817
LPC O--18:2;0(18:2;0)	LPC O-	GPL	LYS	LPC O-	18	2	1	0	0	0	0		0.308281	0.287534	0.345487
LPE-16:0;0(16:0;0)	LPE	GPL	LYS	LPE	16	0	0	0	0.173983	0.204732	0.153241		1.04497	0.982461	1.07051
LPE-16:1;0(16:1;0)	LPE	GPL	LYS	LPE	16	1	1	0	0	0	0		0.175704	0.148806	0.163527
LPE-18:0;0(18:0;0)	LPE	GPL	LYS	LPE	18	0	0	0	0.776392	0.818744	0.621709		4.13574	3.96192	4.57864
LPE-18:1;0(18:1;0)	LPE	GPL	LYS	LPE	18	1	1	0	0.958939	1.04263	0.768457		3.29735	2.95024	3.33292
LPE-18:2;0(18:2;0)	LPE	GPL	LYS	LPE	18	2	2	0	0	0	0		0.117168	0.134827	0.131231
LPE-20:0;0(20:0;0)	LPE	GPL	LYS	LPE	20	0	0	0	0	0	0		0	0	0
LPE-20:1;0(20:1;0)	LPE	GPL	LYS	LPE	20	1	1	0	0.096699	0.110639	0.074175		0.224326	0.20086	0.287048
LPE-20:2;0(20:2;0)	LPE	GPL	LYS	LPE	20	2	2	0	0	0	0		0	0	0
LPE-20:3;0(20:3;0)	LPE	GPL	LYS	LPE	20	3	3	0	0	0	0		0	0	0
LPE-20:4;0(20:4;0)	LPE	GPL	LYS	LPE	20	4	4	0	0.110913	0.10948	0.099615		0.672363	0.61063	0.656328
LPE-22:0;0(22:0;0)	LPE	GPL	LYS	LPE	22	0	0	0	0	0	0		0	0	0
LPE-22:4;0(22:4;0)	LPE	GPL	LYS	LPE	22	4	4	0	0	0	0		0	0	0
LPE-22:5;0(22:5;0)	LPE	GPL	LYS	LPE	22	5	5	0	0	0	0		0	0	0
LPE-22:6;0(22:6;0)	LPE	GPL	LYS	LPE	22	6	6	0	0	0	0		0.091753	0.10739	0
LPE-24:0;0(24:0;0)	LPE	GPL	LYS	LPE	24	0	0	0	0.184062	0.179322	0.188673		0.094953	0	0.109103
LPE-24:1;0(24:1;0)	LPE	GPL	LYS	LPE	24	1	1	0	0	0	0		0	0	0
LPE-24:4;0(24:4;0)	LPE	GPL	LYS	LPE	24	4	4	0	0	0	0		0	0	0
LPE-24:5;0(24:5;0)	LPE	GPL	LYS	LPE	24	5	5	0	0	0	0		0	0	0
LPE-24:6;0(24:6;0)	LPE	GPL	LYS	LPE	24	6	6	0	0	0	0		0	0	0
LPE O--16:0;0(16:0;0)	LPE O-	GPL	LYS	LPE O-	16	0	0	0	0.208006	0.247548	0.169454		0.111267	0.105399	0.14089
LPE O--16:1;0(16:1;0)	LPE O-	GPL	LYS	LPE O-	16	1	0	0	0.489152	0.52607	0.445821		1.02098	0.907472	1.1686
LPE O--18:0;0(18:0;0)	LPE O-	GPL	LYS	LPE O-	18	0	0	0	0.467997	0.548499	0.41713		0.375189	0.375555	0.426173
LPE O--18:1;0(18:1;0)	LPE O-	GPL	LYS	LPE O-	18	1	0	0	1.96405	2.21392	1.7355		3.60127	3.21911	4.0625
LPE O--18:2;0(18:2;0)	LPE O-	GPL	LYS	LPE O-	18	2	1	0	0.919451	1.04481	0.802536		1.12615	1.00624	1.14459
LPI-10:2;0(10:2;0)	LPI	GPL	LYS	LPI	10	2	2	0	0	0	0		0	0	0
LPI-12:5;0(12:5;0)	LPI	GPL	LYS	LPI	12	5	5	0	0	0	0		0	0	0.410963
LPI-14:0;0(14:0;0)	LPI	GPL	LYS	LPI	14	0	0	0	0	0	0		0	0	0
LPI-16:0;0(16:0;0)	LPI	GPL	LYS	LPI	16	0	0	0	0.443772	0.366601	0.309742		0.612948	0.460734	0.678051
LPI-16:1;0(16:1;0)	LPI	GPL	LYS	LPI	16	1	1	0	0	0	0		0	0	0
LPI-18:0;0(18:0;0)	LPI	GPL	LYS	LPI	18	0	0	0	8.53086	7.45418	5.95705		13.7936	12.675	15.2136
LPI-18:1;0(18:1;0)	LPI	GPL	LYS	LPI	18	1	1	0	1.59251	1.44037	1.32085		1.46945	1.07926	1.56512
LPI-18:2;0(18:2;0)	LPI	GPL	LYS	LPI	18	2	2	0	0.080407	0.081096	0.076038		0	0	0
LPI-20:2;0(20:2;0)	LPI	GPL	LYS	LPI	20	2	2	0	0.547475	0.48837	0.456319		0	0	0
LPI-20:4;0(20:4;0)	LPI	GPL	LYS	LPI	20	4	4	0	0.375549	0.39577	0.331951		0.24749	0.239647	0
LPS-10:3;0(10:3;0)	LPS	GPL	LYS	LPS	10	3	3	0	0	0	0		0	0	0
LPS-12:1;0(12:1;0)	LPS	GPL	LYS	LPS	12	1	1	0	0	0	0		0	0	0
LPS-12:6;0(12:6;0)	LPS	GPL	LYS	LPS	12	6	6	0	0	0	0		0	0	0.23704
LPS-16:1;0(16:1;0)	LPS	GPL	LYS	LPS	16	1	1	0	0	0	0		0	0.091111	0
LPS-16:6;0(16:6;0)	LPS	GPL	LYS	LPS	16	6	6	0	0	0	0		0	0	0
LPS-18:0;0(18:0;0)	LPS	GPL	LYS	LPS	18	0	0	0	0.512164	0.560765	0.444952		0.971158	0.853513	1.00276
LPS-18:1;0(18:1;0)	LPS	GPL	LYS	LPS	18	1	1	0	0.519601	0.464682	0.425215		1.6008	1.54664	1.60316
LPS-20:0;0(20:0;0)	LPS	GPL	LYS	LPS	20	0	0	0	0	0	0		0	0	0
LPS-20:2;0(20:2;0)	LPS	GPL	LYS	LPS	20	2	2	0	0	0	0		0	0	0
LPS-20:3;0(20:3;0)	LPS	GPL	LYS	LPS	20	3	3	0	0	0	0		0	0	0
LPS-22:4;0(22:4;0)	LPS	GPL	LYS	LPS	22	4	4	0	0	0	0		0	0	0
LPS-22:6;0(22:6;0)	LPS	GPL	LYS	LPS	22	6	6	0	0	0	0		0	0	0
LPS-24:5;0(24:5;0)	LPS	GPL	LYS	LPS	24	5	5	0	0	0	0		0	0	0
PA-28:0;0(14:0;0-14:0;0)	PA	GPL	MEM	PA	28	0	0	0	0	0	0		0	0	0
PA-30:0;0(15:0;0-15:0;0)	PA	GPL	MEM	PA	30	0	0	0	0	0	0		0	0	0
PA-30:0;0(16:0;0-14:0;0)	PA	GPL	MEM	PA	30	0	0	0	0	0	0		0	0	0
PA-31:0;0(16:0;0-15:0;0)	PA	GPL	MEM	PA	31	0	0	0	0	0	0		0	0	0
PA-31:0;0(17:0;0-14:0;0)	PA	GPL	MEM	PA	31	0	0	0	0	0	0		0	0	0
PA-32:0;0(16:0;0-16:0;0)	PA	GPL	MEM	PA	32	0	0	0	0.551147	0.528351	0.602044		0.590365	0.450291	0
PA-32:0;0(18:0;0-14:0;0)	PA	GPL	MEM	PA	32	0	0	0	0	0	0		0	0	0
PA-32:1;0(16:0;0-16:1;0)	PA	GPL	MEM	PA	32	1	1	0	0.486657	0.479681	0.505662		0.952185	0	1.15793
PA-32:1;0(18:1;0-14:0;0)	PA	GPL	MEM	PA	32	1	1	0	0.187593	0.183491	0.160899		0	0	0
PA-32:2;0(18:2;0-14:0;0)	PA	GPL	MEM	PA	32	2	2	0	0	0	0		0	0	0
PA-32:3;0(18:0;0-14:3;0)	PA	GPL	MEM	PA	32	3	3	0	0.1325	0	0.181095		0	0	0
PA-33:0;0(17:0;0-16:0;0)	PA	GPL	MEM	PA	33	0	0	0	0	0	0		0	0	0
PA-33:0;0(18:0;0-15:0;0)	PA	GPL	MEM	PA	33	0	0	0	0	0	0		0	0	0
PA-33:1;0(17:0;0-16:1;0)	PA	GPL	MEM	PA	33	1	1	0	0	0	0		0	0	0
PA-33:1;0(17:1;0-16:0;0)	PA	GPL	MEM	PA	33	1	1	0	2.93532	0	0		0	0	0
PA-33:1;0(18:1;0-15:0;0)	PA	GPL	MEM	PA	33	1	1	0	0	0	0		0	0	0
PA-33:2;0(18:2;0-15:0;0)	PA	GPL	MEM	PA	33	2	2	0	0	0	0		0	0	0
PA-34:0;0(18:0;0-16:0;0)	PA	GPL	MEM	PA	34	0	0	0	0	0	0		0	0	2.87336
PA-34:1;0(17:0;0-17:1;0)	PA	GPL	MEM	PA	34	1	1	0	0	0	0		1.04126	0	1.53367
PA-34:1;0(18:0;0-16:1;0)	PA	GPL	MEM	PA	34	1	1	0	0.336794	0	0.38242		0.733656	0	0
PA-34:1;0(18:1;0-16:0;0)	PA	GPL	MEM	PA	34	1	1	0	3.31795	3.5453	3.20088		4.32096	4.73829	6.6543
PA-34:2;0(17:1;0-17:1;0)	PA	GPL	MEM	PA	34	2	2	0	0	0	0		0	0.464746	0.894079
PA-34:2;0(18:1;0-16:1;0)	PA	GPL	MEM	PA	34	2	2	0	0.972484	0.841003	0.910865		0	0	0
PA-34:2;0(18:2;0-16:0;0)	PA	GPL	MEM	PA	34	2	2	0	0	0	0		0	0	0
PA-34:3;0(18:2;0-16:1;0)	PA	GPL	MEM	PA	34	3	3	0	0	0	0		0	0	0
PA-34:3;0(18:3;0-16:0;0)	PA	GPL	MEM	PA	34	3	3	0	0	0	0		0	0	0
PA-34:3;0(20:0;0-14:3;0)	PA	GPL	MEM	PA	34	3	3	0	0	0	0		0	0	0
PA-34:3;0(20:3;0-14:0;0)	PA	GPL	MEM	PA	34	3	3	0	0	0	0		0	0	0
PA-34:4;0(20:4;0-14:0;0)	PA	GPL	MEM	PA	34	4	4	0	0	0	0		0	0	0
PA-35:0;0(18:0;0-17:0;0)	PA	GPL	MEM	PA	35	0	0	0	0	0	0		0	0	0
PA-35:1;0(18:0;0-17:1;0)	PA	GPL	MEM	PA	35	1	1	0	1.01917	0	0		5.82063	4.08869	8.397
PA-35:1;0(18:1;0-17:0;0)	PA	GPL	MEM	PA	35	1	1	0	1.53789	2.41624	2.50884		0	1.1549	0
PA-35:2;0(18:1;0-17:1;0)	PA	GPL	MEM	PA	35	2	2	0	0.190957	0	0.320641		0	0	0
PA-35:2;0(18:2;0-17:0;0)	PA	GPL	MEM	PA	35	2	2	0	0.130054	0.292875	0		0	0	0
PA-36:1;0(18:0;0-18:1;0)	PA	GPL	MEM	PA	36	1	1	0	0.549042	0.61603	0.645618		2.07736	1.93383	2.83532
PA-36:1;0(20:1;0-16:0;0)	PA	GPL	MEM	PA	36	1	1	0	0.202318	0.254198	0		0	0	0
PA-36:2;0(18:0;0-18:2;0)	PA	GPL	MEM	PA	36	2	2	0	0.360117	0.259295	0.432597		0	0	0
PA-36:2;0(18:1;0-18:1;0)	PA	GPL	MEM	PA	36	2	2	0	3.94251	2.0395	3.8239		2.69706	2.31225	3.52904
PA-36:2;0(20:2;0-16:0;0)	PA	GPL	MEM	PA	36	2	2	0	0	1.77706	0		0	0	0
PA-36:3;0(18:0;0-18:3;0)	PA	GPL	MEM	PA	36	3	3	0	0	0	0		0	0	0
PA-36:3;0(18:1;0-18:2;0)	PA	GPL	MEM	PA	36	3	3	0	0.299341	0.259181	0.271039		0	0	0
PA-36:3;0(20:3;0-16:0;0)	PA	GPL	MEM	PA	36	3	3	0	0	0	0		0	0	0
PA-36:4;0(18:1;0-18:3;0)	PA	GPL	MEM	PA	36	4	4	0	0	0	0		0	0	0
PA-36:4;0(18:2;0-18:2;0)	PA	GPL	MEM	PA	36	4	4	0	0	0	0		0	0	0
PA-36:4;0(20:3;0-16:1;0)	PA	GPL	MEM	PA	36	4	4	0	0	0	0		0	0	0
PA-36:4;0(20:4;0-16:0;0)	PA	GPL	MEM	PA	36	4	4	0	0	0	0		0	0	0
PA-36:5;0(18:2;0-18:3;0)	PA	GPL	MEM	PA	36	5	5	0	0	0	0		0	0	0
PA-36:5;0(20:4;0-16:1;0)	PA	GPL	MEM	PA	36	5	5	0	0	0	0		0	0	0
PA-36:5;0(20:5;0-16:0;0)	PA	GPL	MEM	PA	36	5	5	0	0	0	0		0	0	0
PA-37:1;0(19:0;0-18:1;0)	PA	GPL	MEM	PA	37	1	1	0	0	0	0		0	0	0
PA-37:2;0(19:0;0-18:2;0)	PA	GPL	MEM	PA	37	2	2	0	0	0	0		0	0	0
PA-37:2;0(20:2;0-17:0;0)	PA	GPL	MEM	PA	37	2	2	0	0	0	0		0	0	0
PA-37:3;0(19:1;0-18:2;0)	PA	GPL	MEM	PA	37	3	3	0	0	0	0		0	0	0
PA-37:3;0(20:3;0-17:0;0)	PA	GPL	MEM	PA	37	3	3	0	0	0	0		0	0	0
PA-37:4;0(20:4;0-17:0;0)	PA	GPL	MEM	PA	37	4	4	0	0	0	0		0	0	0
PA-38:1;0(20:1;0-18:0;0)	PA	GPL	MEM	PA	38	1	1	0	0	0	0		0	0	0
PA-38:1;0(22:1;0-16:0;0)	PA	GPL	MEM	PA	38	1	1	0	0	0	0		0	0	0
PA-38:2;0(20:0;0-18:2;0)	PA	GPL	MEM	PA	38	2	2	0	0	0	0		0	0	0
PA-38:2;0(20:1;0-18:1;0)	PA	GPL	MEM	PA	38	2	2	0	0.230546	0.226795	0.186924		0	0	0
PA-38:2;0(20:2;0-18:0;0)	PA	GPL	MEM	PA	38	2	2	0	0.070221	0.074665	0.059929		0	0	0
PA-38:2;0(22:2;0-16:0;0)	PA	GPL	MEM	PA	38	2	2	0	0	0	0		0	0	0
PA-38:3;0(20:0;0-18:3;0)	PA	GPL	MEM	PA	38	3	3	0	0	0	0		0	0	0
PA-38:3;0(20:2;0-18:1;0)	PA	GPL	MEM	PA	38	3	3	0	0.155347	0.166653	0.104235		0	0	0
PA-38:3;0(20:3;0-18:0;0)	PA	GPL	MEM	PA	38	3	3	0	0.079553	0.08899	0.052175		0	0	0
PA-38:3;0(24:0;0-14:3;0)	PA	GPL	MEM	PA	38	3	3	0	0	0	0		0	0	0
PA-38:4;0(20:2;0-18:2;0)	PA	GPL	MEM	PA	38	4	4	0	0	0	0		0	0	0
PA-38:4;0(20:3;0-18:1;0)	PA	GPL	MEM	PA	38	4	4	0	0	0	0		0	0	0
PA-38:4;0(20:4;0-18:0;0)	PA	GPL	MEM	PA	38	4	4	0	0	0	0		0	0	0
PA-38:4;0(22:4;0-16:0;0)	PA	GPL	MEM	PA	38	4	4	0	0	0	0		0	0	0
PA-38:5;0(20:3;0-18:2;0)	PA	GPL	MEM	PA	38	5	5	0	0	0	0		0	0	0
PA-38:5;0(20:4;0-18:1;0)	PA	GPL	MEM	PA	38	5	5	0	0	0	0		0	0	0
PA-38:5;0(20:5;0-18:0;0)	PA	GPL	MEM	PA	38	5	5	0	0	0	0		0	0	0
PA-38:5;0(22:4;0-16:1;0)	PA	GPL	MEM	PA	38	5	5	0	0	0	0		0	0	0
PA-38:5;0(22:5;0-16:0;0)	PA	GPL	MEM	PA	38	5	5	0	0	0	0		0	0	0
PA-38:6;0(20:4;0-18:2;0)	PA	GPL	MEM	PA	38	6	6	0	0	0	0		0	0	0
PA-38:6;0(22:5;0-16:1;0)	PA	GPL	MEM	PA	38	6	6	0	0	0	0		0	0	0
PA-38:6;0(22:6;0-16:0;0)	PA	GPL	MEM	PA	38	6	6	0	0	0	0		0	0	0
PA-39:4;0(20:4;0-19:0;0)	PA	GPL	MEM	PA	39	4	4	0	0	0	0		0	0	0
PA-39:4;0(22:4;0-17:0;0)	PA	GPL	MEM	PA	39	4	4	0	0	0	0		0	0	0
PA-39:5;0(22:5;0-17:0;0)	PA	GPL	MEM	PA	39	5	5	0	0	0	0		0	0	0
PA-40:4;0(20:0;0-20:4;0)	PA	GPL	MEM	PA	40	4	4	0	0	0	0		0	0	0
PA-40:4;0(20:1;0-20:3;0)	PA	GPL	MEM	PA	40	4	4	0	0	0	0		0	0	0
PA-40:4;0(22:3;0-18:1;0)	PA	GPL	MEM	PA	40	4	4	0	0	0	0		0	0	0
PA-40:4;0(22:4;0-18:0;0)	PA	GPL	MEM	PA	40	4	4	0	0	0	0		0	0	0
PA-40:4;0(24:4;0-16:0;0)	PA	GPL	MEM	PA	40	4	4	0	0	0	0		0	0	0
PA-40:5;0(20:1;0-20:4;0)	PA	GPL	MEM	PA	40	5	5	0	0	0	0		0	0	0
PA-40:5;0(22:4;0-18:1;0)	PA	GPL	MEM	PA	40	5	5	0	0	0	0		0	0	0
PA-40:6;0(20:2;0-20:4;0)	PA	GPL	MEM	PA	40	6	6	0	0	0	0		0	0	0
PA-40:6;0(20:3;0-20:3;0)	PA	GPL	MEM	PA	40	6	6	0	0	0	0		0	0	0
PA-40:6;0(22:4;0-18:2;0)	PA	GPL	MEM	PA	40	6	6	0	0	0	0		0	0	0
PA-40:6;0(22:5;0-18:1;0)	PA	GPL	MEM	PA	40	6	6	0	0	0	0		0	0	0
PA-40:6;0(22:6;0-18:0;0)	PA	GPL	MEM	PA	40	6	6	0	0	0	0		0	0	0
PA-40:7;0(20:3;0-20:4;0)	PA	GPL	MEM	PA	40	7	7	0	0	0	0		0	0	0
PA-40:7;0(22:5;0-18:2;0)	PA	GPL	MEM	PA	40	7	7	0	0	0	0		0	0	0
PA-40:7;0(22:6;0-18:1;0)	PA	GPL	MEM	PA	40	7	7	0	0	0	0		0	0	0
PA-40:8;0(20:4;0-20:4;0)	PA	GPL	MEM	PA	40	8	8	0	0	0	0		0	0	0
PA-42:5;0(22:1;0-20:4;0)	PA	GPL	MEM	PA	42	5	5	0	0	0	0		0	0	0
PA-42:5;0(22:4;0-20:1;0)	PA	GPL	MEM	PA	42	5	5	0	0	0	0		0	0	0
PA-42:5;0(22:5;0-20:0;0)	PA	GPL	MEM	PA	42	5	5	0	0	0	0		0	0	0
PC-24:0;0(12:0;0-12:0;0)	PC	GPL	MEM	PC	24	0	0	0	0	0	0		0	0	0
PC-26:0;0(14:0;0-12:0;0)	PC	GPL	MEM	PC	26	0	0	0	0	0	0		0	0	0
PC-26:0;0(16:0;0-10:0;0)	PC	GPL	MEM	PC	26	0	0	0	0	0	0		0	0	0
PC-27:0;0(14:0;0-13:0;0)	PC	GPL	MEM	PC	27	0	0	0	0	0	0		0	0	0
PC-27:0;0(15:0;0-12:0;0)	PC	GPL	MEM	PC	27	0	0	0	0	0	0		0	0	0
PC-27:0;0(16:0;0-11:0;0)	PC	GPL	MEM	PC	27	0	0	0	0	0	0		0	0	0
PC-28:0;0(14:0;0-14:0;0)	PC	GPL	MEM	PC	28	0	0	0	0	0	0		0	0	0
PC-28:0;0(15:0;0-13:0;0)	PC	GPL	MEM	PC	28	0	0	0	0	0	0		0	0	0
PC-28:0;0(16:0;0-12:0;0)	PC	GPL	MEM	PC	28	0	0	0	0	0	0		0	0	0
PC-28:0;0(17:0;0-11:0;0)	PC	GPL	MEM	PC	28	0	0	0	0	0	0		0	0	0
PC-28:0;0(18:0;0-10:0;0)	PC	GPL	MEM	PC	28	0	0	0	0	0	0		0	0	0
PC-28:1;0(14:0;0-14:1;0)	PC	GPL	MEM	PC	28	1	1	0	0	0	0		0	0	0
PC-28:1;0(16:1;0-12:0;0)	PC	GPL	MEM	PC	28	1	1	0	0	0	0		0	0	0
PC-28:2;0(14:1;0-14:1;0)	PC	GPL	MEM	PC	28	2	2	0	0	0	0		0	0	0
PC-30:0;0(15:0;0-15:0;0)	PC	GPL	MEM	PC	30	0	0	0	0	0	0		0	0	0
PC-30:0;0(16:0;0-14:0;0)	PC	GPL	MEM	PC	30	0	0	0	0	0	0		0	0	0
PC-30:0;0(17:0;0-13:0;0)	PC	GPL	MEM	PC	30	0	0	0	0	0	0		0	0	0
PC-30:0;0(18:0;0-12:0;0)	PC	GPL	MEM	PC	30	0	0	0	0	0	0		0	0	0
PC-30:2;0(16:1;0-14:1;0)	PC	GPL	MEM	PC	30	2	2	0	0	0	0		0	0	0
PC-30:2;0(16:2;0-14:0;0)	PC	GPL	MEM	PC	30	2	2	0	0	0	0		0	0	0
PC-30:2;0(18:2;0-12:0;0)	PC	GPL	MEM	PC	30	2	2	0	0	0	0		0	0	0
PC-30:3;0(16:0;0-14:3;0)	PC	GPL	MEM	PC	30	3	3	0	0	1.49354	0		0	1.41127	2.38246
PC-30:3;0(18:1;0-12:2;0)	PC	GPL	MEM	PC	30	3	3	0	0	0	0		0	2.72198	4.3802
PC-31:0;0(16:0;0-15:0;0)	PC	GPL	MEM	PC	31	0	0	0	1.93667	2.60656	1.86896		0	0	0
PC-31:0;0(17:0;0-14:0;0)	PC	GPL	MEM	PC	31	0	0	0	0.875144	1.004	0.792262		0	0	0
PC-31:0;0(18:0;0-13:0;0)	PC	GPL	MEM	PC	31	0	0	0	0	0	0		0	0	0
PC-31:1;0(16:0;0-15:1;0)	PC	GPL	MEM	PC	31	1	1	0	0	0	0		0	0	0
PC-31:1;0(16:1;0-15:0;0)	PC	GPL	MEM	PC	31	1	1	0	0	0	0		0	0	0
PC-31:1;0(17:0;0-14:1;0)	PC	GPL	MEM	PC	31	1	1	0	0	0	0		0	0	0
PC-31:1;0(17:1;0-14:0;0)	PC	GPL	MEM	PC	31	1	1	0	0	0	0		0	0	0
PC-31:1;0(18:1;0-13:0;0)	PC	GPL	MEM	PC	31	1	1	0	0	0	0		0	0	0
PC-31:2;0(16:1;0-15:1;0)	PC	GPL	MEM	PC	31	2	2	0	0	0	0		0	0	0
PC-31:3;0(17:0;0-14:3;0)	PC	GPL	MEM	PC	31	3	3	0	0	0	0		0	1.66592	0
PC-32:0;0(16:0;0-16:0;0)	PC	GPL	MEM	PC	32	0	0	0	0	0	0		20.3404	13.2289	23.6412
PC-32:0;0(17:0;0-15:0;0)	PC	GPL	MEM	PC	32	0	0	0	0	0	0		1.52275	1.09953	1.86426
PC-32:0;0(18:0;0-14:0;0)	PC	GPL	MEM	PC	32	0	0	0	0	0	0		2.21689	1.66692	2.58714
PC-32:1;0(16:0;0-16:1;0)	PC	GPL	MEM	PC	32	1	1	0	65.6694	99.7169	58.0721		0	1.14445	0
PC-32:1;0(17:1;0-15:0;0)	PC	GPL	MEM	PC	32	1	1	0	4.3616	6.81175	3.6395		0	0.04189	0
PC-32:1;0(18:0;0-14:1;0)	PC	GPL	MEM	PC	32	1	1	0	0	0	0		0	0	0
PC-32:1;0(18:1;0-14:0;0)	PC	GPL	MEM	PC	32	1	1	0	11.9053	17.243	9.82335		0	0.302674	0
PC-32:2;0(16:0;0-16:2;0)	PC	GPL	MEM	PC	32	2	2	0	16.1694	23.5386	12.9807		193.361	127.969	213.395
PC-32:2;0(16:1;0-16:1;0)	PC	GPL	MEM	PC	32	2	2	0	68.4378	102.877	59.7874		370.887	292.227	452.429
PC-32:2;0(17:1;0-15:1;0)	PC	GPL	MEM	PC	32	2	2	0	5.53223	9.28444	0		0	0	0
PC-32:2;0(18:1;0-14:1;0)	PC	GPL	MEM	PC	32	2	2	0	0	0	0		0	0	0
PC-32:2;0(18:2;0-14:0;0)	PC	GPL	MEM	PC	32	2	2	0	3.50872	0	3.58745		0	0	0
PC-32:3;0(16:0;0-16:3;0)	PC	GPL	MEM	PC	32	3	3	0	0	0	0		0	0	0
PC-32:3;0(16:1;0-16:2;0)	PC	GPL	MEM	PC	32	3	3	0	0	0	0		0	0	0
PC-32:3;0(18:0;0-14:3;0)	PC	GPL	MEM	PC	32	3	3	0	0	0	15.384		106.23	79.5847	129.232
PC-32:3;0(18:3;0-14:0;0)	PC	GPL	MEM	PC	32	3	3	0	0	0	0		0	0	0
PC-32:4;0(17:0;0-15:4;0)	PC	GPL	MEM	PC	32	4	4	0	0	0	0		4.06684	2.55759	4.15447
PC-33:0;0(17:0;0-16:0;0)	PC	GPL	MEM	PC	33	0	0	0	0	0	0		0	0	0
PC-33:0;0(18:0;0-15:0;0)	PC	GPL	MEM	PC	33	0	0	0	0	0	0		0	0	0
PC-33:0;0(19:0;0-14:0;0)	PC	GPL	MEM	PC	33	0	0	0	0	0	0		0	0	0
PC-33:1;0(17:0;0-16:1;0)	PC	GPL	MEM	PC	33	1	1	0	3.16219	5.1124	2.82255		1.46622	1.05037	1.69422
PC-33:1;0(17:1;0-16:0;0)	PC	GPL	MEM	PC	33	1	1	0	21.4201	33.0862	18.1983		19.5283	14.6077	22.5423
PC-33:1;0(18:0;0-15:1;0)	PC	GPL	MEM	PC	33	1	1	0	0	0	0		0	0	0
PC-33:1;0(18:1;0-15:0;0)	PC	GPL	MEM	PC	33	1	1	0	18.0221	27.7648	15.5884		10.252	7.33473	11.6808
PC-33:1;0(19:1;0-14:0;0)	PC	GPL	MEM	PC	33	1	1	0	0	0	0		0	0	0
PC-33:2;0(17:0;0-16:2;0)	PC	GPL	MEM	PC	33	2	2	0	0	0	0		0	0	0.360613
PC-33:2;0(17:1;0-16:1;0)	PC	GPL	MEM	PC	33	2	2	0	5.01095	6.98816	3.9389		17.5313	13.647	21.2718
PC-33:2;0(17:2;0-16:0;0)	PC	GPL	MEM	PC	33	2	2	0	0.584561	0.812114	0.47538		0	0	0
PC-33:2;0(18:1;0-15:1;0)	PC	GPL	MEM	PC	33	2	2	0	0	0	0		0	0	0
PC-33:2;0(18:2;0-15:0;0)	PC	GPL	MEM	PC	33	2	2	0	0	0	0		0	0	0
PC-33:2;0(19:2;0-14:0;0)	PC	GPL	MEM	PC	33	2	2	0	0	0	0		0	0	0
PC-33:3;0(18:3;0-15:0;0)	PC	GPL	MEM	PC	33	3	3	0	0	0	0		0	0	0
PC-33:4;0(17:0;0-16:4;0)	PC	GPL	MEM	PC	33	4	4	0	0	0	0		0	0	0
PC-33:4;0(18:0;0-15:4;0)	PC	GPL	MEM	PC	33	4	4	0	0	0	0		0	0	0
PC-34:0;0(18:0;0-16:0;0)	PC	GPL	MEM	PC	34	0	0	0	0	0	0		0	0	0
PC-34:0;0(20:0;0-14:0;0)	PC	GPL	MEM	PC	34	0	0	0	0	0	0		0	0	0
PC-34:1;0(17:0;0-17:1;0)	PC	GPL	MEM	PC	34	1	1	0	8.74819	12.9865	7.57		4.98325	3.4521	5.38761
PC-34:1;0(18:0;0-16:1;0)	PC	GPL	MEM	PC	34	1	1	0	15.0065	22.161	12.8032		14.6247	10.5515	16.4977
PC-34:1;0(18:1;0-16:0;0)	PC	GPL	MEM	PC	34	1	1	0	680.451	1035.42	603.545		639.677	474.591	717.555
PC-34:1;0(19:1;0-15:0;0)	PC	GPL	MEM	PC	34	1	1	0	0	0	0		0	0	0
PC-34:1;0(20:1;0-14:0;0)	PC	GPL	MEM	PC	34	1	1	0	0.579734	0	0.754743		0.86659	0.705189	1.44829
PC-34:2;0(17:1;0-17:1;0)	PC	GPL	MEM	PC	34	2	2	0	4.44195	6.76512	3.9789		2.56291	2.07832	3.02206
PC-34:2;0(18:0;0-16:2;0)	PC	GPL	MEM	PC	34	2	2	0	1.43718	0	0		0	0	0
PC-34:2;0(18:1;0-16:1;0)	PC	GPL	MEM	PC	34	2	2	0	79.3802	123.312	68.5266		89.0964	63.8049	100.018
PC-34:2;0(18:2;0-16:0;0)	PC	GPL	MEM	PC	34	2	2	0	18.9447	29.4901	15.7795		25.9306	20.9214	30.6705
PC-34:2;0(19:2;0-15:0;0)	PC	GPL	MEM	PC	34	2	2	0	0	0	0		0	0	0
PC-34:2;0(20:2;0-14:0;0)	PC	GPL	MEM	PC	34	2	2	0	0.256622	0	0		0	0	0
PC-34:3;0(18:1;0-16:2;0)	PC	GPL	MEM	PC	34	3	3	0	4.83287	7.11494	4.23841		15.8038	10.3678	0
PC-34:3;0(18:2;0-16:1;0)	PC	GPL	MEM	PC	34	3	3	0	4.17304	5.98774	3.42857		6.22512	4.05304	20.8734
PC-34:3;0(18:3;0-16:0;0)	PC	GPL	MEM	PC	34	3	3	0	1.65079	1.95678	1.25624		3.30771	5.5322	9.32207
PC-34:3;0(20:0;0-14:3;0)	PC	GPL	MEM	PC	34	3	3	0	0	0	0		0	0	0
PC-34:3;0(20:3;0-14:0;0)	PC	GPL	MEM	PC	34	3	3	0	0	0	0		0	0	0
PC-34:4;0(18:1;0-16:3;0)	PC	GPL	MEM	PC	34	4	4	0	0	0	0		0	0	0
PC-34:4;0(18:3;0-16:1;0)	PC	GPL	MEM	PC	34	4	4	0	0	0	0		0	0	0
PC-34:4;0(20:1;0-14:3;0)	PC	GPL	MEM	PC	34	4	4	0	0	0	0		0	0	26.2681
PC-34:4;0(20:4;0-14:0;0)	PC	GPL	MEM	PC	34	4	4	0	0	0	0		0	0	0
PC-34:4;0(22:4;0-12:0;0)	PC	GPL	MEM	PC	34	4	4	0	0	0	0		0	0	0
PC-34:7;0(17:1;0-17:6;0)	PC	GPL	MEM	PC	34	7	7	0	0	0	0		0	0	0
PC-34:7;0(20:4;0-14:3;0)	PC	GPL	MEM	PC	34	7	7	0	0	0	0		0	0	0
PC-35:0;0(18:0;0-17:0;0)	PC	GPL	MEM	PC	35	0	0	0	0	0	0		0	0	0
PC-35:0;0(19:0;0-16:0;0)	PC	GPL	MEM	PC	35	0	0	0	0	0	0		0	0	0
PC-35:1;0(18:0;0-17:1;0)	PC	GPL	MEM	PC	35	1	1	0	0	0	0		0	0	0
PC-35:1;0(18:1;0-17:0;0)	PC	GPL	MEM	PC	35	1	1	0	29.3841	49.23	24.4009		20.7005	13.5248	23.3939
PC-35:1;0(19:0;0-16:1;0)	PC	GPL	MEM	PC	35	1	1	0	0	0	0		0	0	0
PC-35:1;0(19:1;0-16:0;0)	PC	GPL	MEM	PC	35	1	1	0	1.41461	2.16026	1.13388		1.63839	1.06079	1.82292
PC-35:1;0(20:1;0-15:0;0)	PC	GPL	MEM	PC	35	1	1	0	2.6131	0	2.15314		2.66652	1.74222	0
PC-35:2;0(18:1;0-17:1;0)	PC	GPL	MEM	PC	35	2	2	0	32.3835	50.7098	28.6032		27.6662	20.6667	31.6577
PC-35:2;0(18:2;0-17:0;0)	PC	GPL	MEM	PC	35	2	2	0	1.11094	1.808	1.0175		1.40382	0.957892	1.79362
PC-35:2;0(19:1;0-16:1;0)	PC	GPL	MEM	PC	35	2	2	0	0.291536	0.448445	0.281373		0.32687	0.180785	0.375038
PC-35:2;0(19:2;0-16:0;0)	PC	GPL	MEM	PC	35	2	2	0	0.485694	0.829006	0.487447		0.720883	0.533164	0.863627
PC-35:2;0(20:2;0-15:0;0)	PC	GPL	MEM	PC	35	2	2	0	0	0	0		0	0	0
PC-35:3;0(18:1;0-17:2;0)	PC	GPL	MEM	PC	35	3	3	0	0	0	0		0	0	0
PC-35:3;0(18:2;0-17:1;0)	PC	GPL	MEM	PC	35	3	3	0	2.42373	3.08655	1.74409		3.4179	2.11266	3.76765
PC-35:3;0(18:3;0-17:0;0)	PC	GPL	MEM	PC	35	3	3	0	0	0	0		0	0	0
PC-35:3;0(19:2;0-16:1;0)	PC	GPL	MEM	PC	35	3	3	0	0	0	0		0	0	0
PC-35:3;0(19:3;0-16:0;0)	PC	GPL	MEM	PC	35	3	3	0	0	0	0		0	0	0
PC-35:3;0(20:3;0-15:0;0)	PC	GPL	MEM	PC	35	3	3	0	0	0	0		0	0	0
PC-35:4;0(20:4;0-15:0;0)	PC	GPL	MEM	PC	35	4	4	0	0	0	0		0	0	0
PC-35:5;0(20:5;0-15:0;0)	PC	GPL	MEM	PC	35	5	5	0	0	0	0		0	0	0
PC-36:1;0(18:0;0-18:1;0)	PC	GPL	MEM	PC	36	1	1	0	16.6662	28.4692	16.8353		8.67457	4.60617	11.4322
PC-36:1;0(19:0;0-17:1;0)	PC	GPL	MEM	PC	36	1	1	0	0	0	0		0	0	0
PC-36:1;0(19:1;0-17:0;0)	PC	GPL	MEM	PC	36	1	1	0	0.096212	0.182155	0.101769		0	0.019425	0.071148
PC-36:1;0(20:0;0-16:1;0)	PC	GPL	MEM	PC	36	1	1	0	0	0.177735	0.101522		0	0	0.103667
PC-36:1;0(20:1;0-16:0;0)	PC	GPL	MEM	PC	36	1	1	0	1.83403	3.05004	1.84494		1.32344	0.769434	1.90591
PC-36:1;0(21:1;0-15:0;0)	PC	GPL	MEM	PC	36	1	1	0	0	0.056578	0.03307		0	0	0.081723
PC-36:1;0(22:1;0-14:0;0)	PC	GPL	MEM	PC	36	1	1	0	0	0	0		0	0	0
PC-36:2;0(18:0;0-18:2;0)	PC	GPL	MEM	PC	36	2	2	0	4.957	7.5988	4.56076		6.37137	5.75171	8.15017
PC-36:2;0(18:1;0-18:1;0)	PC	GPL	MEM	PC	36	2	2	0	443.02	659.559	384.633		384.346	288.908	433.004
PC-36:2;0(19:1;0-17:1;0)	PC	GPL	MEM	PC	36	2	2	0	0	1.8353	0		0	0	0
PC-36:2;0(19:2;0-17:0;0)	PC	GPL	MEM	PC	36	2	2	0	0.513154	0.495042	0		0	0	0
PC-36:2;0(20:1;0-16:1;0)	PC	GPL	MEM	PC	36	2	2	0	5.42118	8.34325	4.97955		4.95809	3.31032	5.23583
PC-36:2;0(20:2;0-16:0;0)	PC	GPL	MEM	PC	36	2	2	0	9.93335	15.8778	9.28242		8.42697	6.29288	9.00517
PC-36:3;0(18:0;0-18:3;0)	PC	GPL	MEM	PC	36	3	3	0	0	0	0		0	1.96327	0
PC-36:3;0(18:1;0-18:2;0)	PC	GPL	MEM	PC	36	3	3	0	15.7377	22.4621	13.1389		22.006	16.6301	26.462
PC-36:3;0(19:2;0-17:1;0)	PC	GPL	MEM	PC	36	3	3	0	0	0.691726	0		0.39964	0	0
PC-36:3;0(20:2;0-16:1;0)	PC	GPL	MEM	PC	36	3	3	0	1.89881	2.77712	1.5606		1.44064	1.16768	1.76746
PC-36:3;0(20:3;0-16:0;0)	PC	GPL	MEM	PC	36	3	3	0	4.72309	7.70571	4.51182		12.7545	8.11012	14.6618
PC-36:3;0(22:0;0-14:3;0)	PC	GPL	MEM	PC	36	3	3	0	0	0	0		0	0	0
PC-36:3;0(22:3;0-14:0;0)	PC	GPL	MEM	PC	36	3	3	0	0	0	0		0	0	0
PC-36:4;0(18:1;0-18:3;0)	PC	GPL	MEM	PC	36	4	4	0	0.916819	1.27523	0.728664		1.35715	1.38711	1.9763
PC-36:4;0(18:2;0-18:2;0)	PC	GPL	MEM	PC	36	4	4	0	0.782719	0.330764	0.233189		0.241756	0.490604	0.192025
PC-36:4;0(20:3;0-16:1;0)	PC	GPL	MEM	PC	36	4	4	0	0.798635	1.34424	0		1.33793	1.07084	0
PC-36:4;0(20:4;0-16:0;0)	PC	GPL	MEM	PC	36	4	4	0	3.58589	5.73838	3.65358		6.37912	7.92708	8.60745
PC-36:4;0(22:4;0-14:0;0)	PC	GPL	MEM	PC	36	4	4	0	0	0	0		0	0	0
PC-36:5;0(18:2;0-18:3;0)	PC	GPL	MEM	PC	36	5	5	0	0	0	0		0	0	0
PC-36:5;0(20:4;0-16:1;0)	PC	GPL	MEM	PC	36	5	5	0	0	0.802281	1.46815		0	5.81465	0
PC-36:5;0(20:5;0-16:0;0)	PC	GPL	MEM	PC	36	5	5	0	0	1.84254	0		9.01012	0	0
PC-36:5;0(22:5;0-14:0;0)	PC	GPL	MEM	PC	36	5	5	0	0	0	0		0	0	0
PC-36:6;0(20:5;0-16:1;0)	PC	GPL	MEM	PC	36	6	6	0	0	0	0		0	0	0
PC-36:6;0(22:6;0-14:0;0)	PC	GPL	MEM	PC	36	6	6	0	0	0	0		0	0	0
PC-36:7;0(22:4;0-14:3;0)	PC	GPL	MEM	PC	36	7	7	0	0	0	0		0	0	0
PC-37:1;0(19:0;0-18:1;0)	PC	GPL	MEM	PC	37	1	1	0	1.32709	2.01094	1.06636		0.639242	0.584907	0.879728
PC-37:1;0(19:1;0-18:0;0)	PC	GPL	MEM	PC	37	1	1	0	0	0	0		0.062263	0.055995	0.141079
PC-37:1;0(20:0;0-17:1;0)	PC	GPL	MEM	PC	37	1	1	0	0	0	0.073032		0.087388	0.10616	0.163469
PC-37:1;0(20:1;0-17:0;0)	PC	GPL	MEM	PC	37	1	1	0	0.799675	1.22124	0.621644		0.474643	0.510739	0.807255
PC-37:1;0(21:1;0-16:0;0)	PC	GPL	MEM	PC	37	1	1	0	0	0	0		0	0	0
PC-37:1;0(22:1;0-15:0;0)	PC	GPL	MEM	PC	37	1	1	0	0	0	0		0	0	0
PC-37:2;0(19:0;0-18:2;0)	PC	GPL	MEM	PC	37	2	2	0	0	0	0		0	0	0
PC-37:2;0(19:1;0-18:1;0)	PC	GPL	MEM	PC	37	2	2	0	5.49486	6.78249	3.41349		4.66255	2.45472	4.16208
PC-37:2;0(19:2;0-18:0;0)	PC	GPL	MEM	PC	37	2	2	0	0	0.167688	0		0	0	0
PC-37:2;0(20:1;0-17:1;0)	PC	GPL	MEM	PC	37	2	2	0	3.71751	4.76249	2.39833		2.87676	1.79623	2.56092
PC-37:2;0(20:2;0-17:0;0)	PC	GPL	MEM	PC	37	2	2	0	0	2.29448	1.04258		0	0.686714	1.08372
PC-37:2;0(21:2;0-16:0;0)	PC	GPL	MEM	PC	37	2	2	0	0	0	0		0	0	0
PC-37:3;0(19:1;0-18:2;0)	PC	GPL	MEM	PC	37	3	3	0	0	0	0		0	0	0.215088
PC-37:3;0(19:2;0-18:1;0)	PC	GPL	MEM	PC	37	3	3	0	2.14227	3.29725	2.00851		2.07303	1.32416	2.81234
PC-37:3;0(20:2;0-17:1;0)	PC	GPL	MEM	PC	37	3	3	0	3.29973	4.61368	3.05461		0	0.794543	0
PC-37:3;0(20:3;0-17:0;0)	PC	GPL	MEM	PC	37	3	3	0	0	0	0		2.60964	1.569	3.31484
PC-37:3;0(21:3;0-16:0;0)	PC	GPL	MEM	PC	37	3	3	0	0	0	0		0	0	0
PC-37:4;0(20:3;0-17:1;0)	PC	GPL	MEM	PC	37	4	4	0	0	0	0		0	0	0
PC-37:4;0(20:4;0-17:0;0)	PC	GPL	MEM	PC	37	4	4	0	0	0	0		0	0	0
PC-37:4;0(22:4;0-15:0;0)	PC	GPL	MEM	PC	37	4	4	0	0	0	0		0	0	0
PC-37:5;0(20:4;0-17:1;0)	PC	GPL	MEM	PC	37	5	5	0	0	0	0		0	0	0
PC-37:5;0(20:5;0-17:0;0)	PC	GPL	MEM	PC	37	5	5	0	0	0	0		0	0	0
PC-37:5;0(22:5;0-15:0;0)	PC	GPL	MEM	PC	37	5	5	0	0	0	0		0	0	0
PC-37:6;0(20:5;0-17:1;0)	PC	GPL	MEM	PC	37	6	6	0	0	0	0		0	0	0
PC-37:6;0(22:6;0-15:0;0)	PC	GPL	MEM	PC	37	6	6	0	0	0	0		0	0	0
PC-37:7;0(20:1;0-17:6;0)	PC	GPL	MEM	PC	37	7	7	0	0	0	0		0	0	0
PC-38:1;0(20:0;0-18:1;0)	PC	GPL	MEM	PC	38	1	1	0	0	0	0		0	0	0
PC-38:1;0(20:1;0-18:0;0)	PC	GPL	MEM	PC	38	1	1	0	0	0	0		0	0	0
PC-38:1;0(22:1;0-16:0;0)	PC	GPL	MEM	PC	38	1	1	0	0	0	0		0	0	0
PC-38:1;0(24:1;0-14:0;0)	PC	GPL	MEM	PC	38	1	1	0	0	0	0		0	0	0
PC-38:2;0(20:0;0-18:2;0)	PC	GPL	MEM	PC	38	2	2	0	0	0	0		0	0	0
PC-38:2;0(20:1;0-18:1;0)	PC	GPL	MEM	PC	38	2	2	0	32.1869	50.9385	29.0858		31.6433	23.2377	37.6743
PC-38:2;0(20:2;0-18:0;0)	PC	GPL	MEM	PC	38	2	2	0	2.30761	3.14766	1.83441		1.68435	1.24516	1.7982
PC-38:2;0(21:2;0-17:0;0)	PC	GPL	MEM	PC	38	2	2	0	0	0	0		0	0	0
PC-38:2;0(22:1;0-16:1;0)	PC	GPL	MEM	PC	38	2	2	0	0.369179	0.805173	0.330246		0.516213	0.392351	1.0528
PC-38:2;0(22:2;0-16:0;0)	PC	GPL	MEM	PC	38	2	2	0	0.213364	0	0		0.462956	0.367945	0
PC-38:3;0(20:1;0-18:2;0)	PC	GPL	MEM	PC	38	3	3	0	1.05459	1.62937	0.845525		1.47166	0.944711	1.72504
PC-38:3;0(20:2;0-18:1;0)	PC	GPL	MEM	PC	38	3	3	0	12.5743	17.4882	10.0804		12.1319	7.94564	11.9705
PC-38:3;0(20:3;0-18:0;0)	PC	GPL	MEM	PC	38	3	3	0	1.26979	2.13188	1.06439		4.05036	2.6248	4.03871
PC-38:3;0(22:2;0-16:1;0)	PC	GPL	MEM	PC	38	3	3	0	0	0	0		0	0	0
PC-38:3;0(22:3;0-16:0;0)	PC	GPL	MEM	PC	38	3	3	0	0	0	0		0	0.270016	0.423999
PC-38:3;0(24:0;0-14:3;0)	PC	GPL	MEM	PC	38	3	3	0	0	0	0		0	0	0
PC-38:4;0(20:2;0-18:2;0)	PC	GPL	MEM	PC	38	4	4	0	0.233784	0.393322	0.176981		0	0	0
PC-38:4;0(20:3;0-18:1;0)	PC	GPL	MEM	PC	38	4	4	0	2.8289	4.08741	2.22935		5.89802	4.53488	6.53624
PC-38:4;0(20:4;0-18:0;0)	PC	GPL	MEM	PC	38	4	4	0	0.570526	1.32823	0.637735		1.96032	1.44883	1.80621
PC-38:4;0(22:3;0-16:1;0)	PC	GPL	MEM	PC	38	4	4	0	0	0	0		0	0	0
PC-38:4;0(22:4;0-16:0;0)	PC	GPL	MEM	PC	38	4	4	0	0.423333	0.865918	0.421189		1.30478	1.31126	1.31468
PC-38:4;0(24:1;0-14:3;0)	PC	GPL	MEM	PC	38	4	4	0	0	0	0		0	0	0
PC-38:4;0(24:4;0-14:0;0)	PC	GPL	MEM	PC	38	4	4	0	0	0	0		0	0	0
PC-38:5;0(20:3;0-18:2;0)	PC	GPL	MEM	PC	38	5	5	0	0	0	0		0.376081	0	0
PC-38:5;0(20:4;0-18:1;0)	PC	GPL	MEM	PC	38	5	5	0	4.08095	4.79571	3.39369		4.39878	3.81503	6.19381
PC-38:5;0(20:5;0-18:0;0)	PC	GPL	MEM	PC	38	5	5	0	0	0	0		0	0	0
PC-38:5;0(22:4;0-16:1;0)	PC	GPL	MEM	PC	38	5	5	0	0	0	0		0	0	0
PC-38:5;0(22:5;0-16:0;0)	PC	GPL	MEM	PC	38	5	5	0	0	1.47516	0		2.53064	2.40359	2.8612
PC-38:5;0(24:5;0-14:0;0)	PC	GPL	MEM	PC	38	5	5	0	0	0	0		0	0	0
PC-38:6;0(20:4;0-18:2;0)	PC	GPL	MEM	PC	38	6	6	0	0	0	0		0	0	0
PC-38:6;0(20:5;0-18:1;0)	PC	GPL	MEM	PC	38	6	6	0	0	0	0		0	0	0
PC-38:6;0(22:5;0-16:1;0)	PC	GPL	MEM	PC	38	6	6	0	0	0	0		0	0	0
PC-38:6;0(22:6;0-16:0;0)	PC	GPL	MEM	PC	38	6	6	0	0	0	0		0	0	0
PC-38:6;0(24:6;0-14:0;0)	PC	GPL	MEM	PC	38	6	6	0	0	0	0		0	0	0
PC-39:2;0(20:1;0-19:1;0)	PC	GPL	MEM	PC	39	2	2	0	0	0	0		0	0	0
PC-39:2;0(21:1;0-18:1;0)	PC	GPL	MEM	PC	39	2	2	0	0	0	0		0	0	0
PC-39:2;0(22:1;0-17:1;0)	PC	GPL	MEM	PC	39	2	2	0	0.93584	0	0		0	0	0
PC-39:2;0(22:2;0-17:0;0)	PC	GPL	MEM	PC	39	2	2	0	0	0	0		0	0	0
PC-39:3;0(20:2;0-19:1;0)	PC	GPL	MEM	PC	39	3	3	0	0	0	0		0	0	0
PC-39:3;0(22:3;0-17:0;0)	PC	GPL	MEM	PC	39	3	3	0	0	0	0		0	0	0
PC-39:4;0(20:3;0-19:1;0)	PC	GPL	MEM	PC	39	4	4	0	0	0	0		0	0	0
PC-39:4;0(20:4;0-19:0;0)	PC	GPL	MEM	PC	39	4	4	0	0	0	0		0	0	0
PC-39:4;0(22:4;0-17:0;0)	PC	GPL	MEM	PC	39	4	4	0	0	0	0		0	0	0
PC-39:4;0(24:4;0-15:0;0)	PC	GPL	MEM	PC	39	4	4	0	0	0	0		0	0	0
PC-39:5;0(20:4;0-19:1;0)	PC	GPL	MEM	PC	39	5	5	0	0	0	0		0	0	0
PC-39:5;0(22:4;0-17:1;0)	PC	GPL	MEM	PC	39	5	5	0	0	0	0		0.805599	0	0
PC-39:5;0(22:5;0-17:0;0)	PC	GPL	MEM	PC	39	5	5	0	0.848296	1.37249	1.19044		0.420717	0.992258	1.35026
PC-39:5;0(24:5;0-15:0;0)	PC	GPL	MEM	PC	39	5	5	0	0	0	0		0	0	0
PC-39:6;0(22:5;0-17:1;0)	PC	GPL	MEM	PC	39	6	6	0	0	0	0		0	0	0
PC-39:6;0(22:6;0-17:0;0)	PC	GPL	MEM	PC	39	6	6	0	0	0	0		0	0	0
PC-39:6;0(24:6;0-15:0;0)	PC	GPL	MEM	PC	39	6	6	0	0	0	0		0	0	0
PC-39:7;0(22:6;0-17:1;0)	PC	GPL	MEM	PC	39	7	7	0	0	0	0		0	0	0
PC-40:0;0(24:0;0-16:0;0)	PC	GPL	MEM	PC	40	0	0	0	0	0	0		0	0	0
PC-40:1;0(22:0;0-18:1;0)	PC	GPL	MEM	PC	40	1	1	0	0	0	0		0	0	0
PC-40:1;0(22:1;0-18:0;0)	PC	GPL	MEM	PC	40	1	1	0	0	0	0		0	0	0
PC-40:1;0(24:0;0-16:1;0)	PC	GPL	MEM	PC	40	1	1	0	0	0	0		0	0	0
PC-40:1;0(24:1;0-16:0;0)	PC	GPL	MEM	PC	40	1	1	0	0	0	0		0	0	0
PC-40:2;0(20:1;0-20:1;0)	PC	GPL	MEM	PC	40	2	2	0	0.346228	0.501036	0.25745		0.176024	0	0.247898
PC-40:2;0(22:1;0-18:1;0)	PC	GPL	MEM	PC	40	2	2	0	3.35098	4.43888	2.69276		3.42049	2.58001	3.98751
PC-40:2;0(22:2;0-18:0;0)	PC	GPL	MEM	PC	40	2	2	0	0	0	0		0	0	0
PC-40:2;0(24:1;0-16:1;0)	PC	GPL	MEM	PC	40	2	2	0	0	0	0		0	0	0
PC-40:2;0(24:2;0-16:0;0)	PC	GPL	MEM	PC	40	2	2	0	0	0	0		0	0	0
PC-40:3;0(20:0;0-20:3;0)	PC	GPL	MEM	PC	40	3	3	0	0	0	0		0	0	0
PC-40:3;0(20:1;0-20:2;0)	PC	GPL	MEM	PC	40	3	3	0	0.263154	0.673089	0		1.5229	0	0.604514
PC-40:3;0(22:1;0-18:2;0)	PC	GPL	MEM	PC	40	3	3	0	0	0	0		0	0	0
PC-40:3;0(22:2;0-18:1;0)	PC	GPL	MEM	PC	40	3	3	0	0.59978	0.995872	0		0	0	0.740847
PC-40:3;0(22:3;0-18:0;0)	PC	GPL	MEM	PC	40	3	3	0	0	0	0		0	0	0
PC-40:3;0(24:3;0-16:0;0)	PC	GPL	MEM	PC	40	3	3	0	0	0	0		0	0	0
PC-40:4;0(20:0;0-20:4;0)	PC	GPL	MEM	PC	40	4	4	0	0	0	0		0	0	0
PC-40:4;0(20:1;0-20:3;0)	PC	GPL	MEM	PC	40	4	4	0	0	0	0		0.502948	0	0.957069
PC-40:4;0(20:2;0-20:2;0)	PC	GPL	MEM	PC	40	4	4	0	0	0	0		0.144525	0	0
PC-40:4;0(22:3;0-18:1;0)	PC	GPL	MEM	PC	40	4	4	0	0	0	0		0	0	0
PC-40:4;0(22:4;0-18:0;0)	PC	GPL	MEM	PC	40	4	4	0	0	0	0		0.709838	0	0.648105
PC-40:4;0(24:4;0-16:0;0)	PC	GPL	MEM	PC	40	4	4	0	0	0	0		0	0	0
PC-40:5;0(20:1;0-20:4;0)	PC	GPL	MEM	PC	40	5	5	0	0	0	0		0.326804	0	0
PC-40:5;0(20:2;0-20:3;0)	PC	GPL	MEM	PC	40	5	5	0	0	0	0		0	0	0
PC-40:5;0(22:4;0-18:1;0)	PC	GPL	MEM	PC	40	5	5	0	0	1.48374	0.52333		1.0612	1.24814	1.70307
PC-40:5;0(22:5;0-18:0;0)	PC	GPL	MEM	PC	40	5	5	0	0	0	0.27775		1.1818	1.20029	1.51968
PC-40:5;0(24:4;0-16:1;0)	PC	GPL	MEM	PC	40	5	5	0	0	0	0		0	0	0
PC-40:5;0(24:5;0-16:0;0)	PC	GPL	MEM	PC	40	5	5	0	0	0	0		0	0	0
PC-40:6;0(20:2;0-20:4;0)	PC	GPL	MEM	PC	40	6	6	0	0	0	0		0	0	0
PC-40:6;0(20:3;0-20:3;0)	PC	GPL	MEM	PC	40	6	6	0	0	0	0		0	0	0
PC-40:6;0(22:4;0-18:2;0)	PC	GPL	MEM	PC	40	6	6	0	0	0	0		0	0	0
PC-40:6;0(22:5;0-18:1;0)	PC	GPL	MEM	PC	40	6	6	0	0	0	0		1.72058	1.64493	1.92079
PC-40:6;0(22:6;0-18:0;0)	PC	GPL	MEM	PC	40	6	6	0	0	0	0		0	0	0
PC-40:6;0(24:6;0-16:0;0)	PC	GPL	MEM	PC	40	6	6	0	0	0	0		0	0	0
PC-40:7;0(20:3;0-20:4;0)	PC	GPL	MEM	PC	40	7	7	0	0	0	0		0	0	0
PC-40:7;0(22:6;0-18:1;0)	PC	GPL	MEM	PC	40	7	7	0	0	0	0		0	0	0
PC-41:5;0(24:5;0-17:0;0)	PC	GPL	MEM	PC	41	5	5	0	0	0	0		0	0	0
PC-42:0;0(24:0;0-18:0;0)	PC	GPL	MEM	PC	42	0	0	0	0	0	0		0	0	0
PC-42:1;0(24:0;0-18:1;0)	PC	GPL	MEM	PC	42	1	1	0	1.02531	0	0		2.10404	1.27679	2.08192
PC-42:1;0(24:1;0-18:0;0)	PC	GPL	MEM	PC	42	1	1	0	0	0	0		0	0	0
PC-42:2;0(24:0;0-18:2;0)	PC	GPL	MEM	PC	42	2	2	0	0	0	0		0	0	0
PC-42:2;0(24:1;0-18:1;0)	PC	GPL	MEM	PC	42	2	2	0	1.28044	1.88005	0.838673		1.33651	0.96714	1.81707
PC-42:2;0(24:2;0-18:0;0)	PC	GPL	MEM	PC	42	2	2	0	0	0	0		0	0	0
PC-42:4;0(24:3;0-18:1;0)	PC	GPL	MEM	PC	42	4	4	0	0	0	0		0	0	0
PC-42:4;0(24:4;0-18:0;0)	PC	GPL	MEM	PC	42	4	4	0	0	0	0		0	0	0
PC-42:5;0(22:1;0-20:4;0)	PC	GPL	MEM	PC	42	5	5	0	0	0	0		0	0	0
PC-42:5;0(22:4;0-20:1;0)	PC	GPL	MEM	PC	42	5	5	0	0	0	0		0	0	0
PC-42:5;0(24:4;0-18:1;0)	PC	GPL	MEM	PC	42	5	5	0	0	0	0		0	0	0
PC-42:5;0(24:5;0-18:0;0)	PC	GPL	MEM	PC	42	5	5	0	0	0	0		0	0	0
PC-42:6;0(22:2;0-20:4;0)	PC	GPL	MEM	PC	42	6	6	0	0	0	0		0	0	0
PC-42:6;0(22:3;0-20:3;0)	PC	GPL	MEM	PC	42	6	6	0	0	0	0		0	0	0
PC-42:6;0(22:4;0-20:2;0)	PC	GPL	MEM	PC	42	6	6	0	0	0	0		0	0	0
PC-42:6;0(22:5;0-20:1;0)	PC	GPL	MEM	PC	42	6	6	0	0	0	0		0	0	0
PC-42:6;0(24:4;0-18:2;0)	PC	GPL	MEM	PC	42	6	6	0	0	0	0		0	0	0
PC-42:6;0(24:5;0-18:1;0)	PC	GPL	MEM	PC	42	6	6	0	0	0	0		0	0	0
PC-42:6;0(24:6;0-18:0;0)	PC	GPL	MEM	PC	42	6	6	0	0	0	0		0	0	0
PC-42:7;0(22:3;0-20:4;0)	PC	GPL	MEM	PC	42	7	7	0	0	0	0		0	0	0
PC-42:7;0(22:4;0-20:3;0)	PC	GPL	MEM	PC	42	7	7	0	0	0	0		0	0	0
PC-42:7;0(24:6;0-18:1;0)	PC	GPL	MEM	PC	42	7	7	0	0	0	0		0	0	0
PC-44:12;0(22:6;0-22:6;0)	PC	GPL	MEM	PC	44	12	12	0	0	0	0		0	0	0
PC O--30:0;0(16:0;0-14:0;0)	PC O-	GPL	MEM	PC O-	30	0	0	0	3.53567	5.51731	3.34004		2.71162	2.43922	2.19593
PC O--30:0;0(17:0;0-13:0;0)	PC O-	GPL	MEM	PC O-	30	0	0	0	0	0	0		0	0	0
PC O--30:0;0(18:0;0-12:0;0)	PC O-	GPL	MEM	PC O-	30	0	0	0	0	0	0		0	0	0
PC O--30:1;0(16:0;0-14:1;0)	PC O-	GPL	MEM	PC O-	30	1	0	0	0	0.203933	0		0	0	0
PC O--30:1;0(16:1;0-14:0;0)	PC O-	GPL	MEM	PC O-	30	1	0	0	1.82562	2.11865	1.64386		0	0	0
PC O--30:1;0(17:1;0-13:0;0)	PC O-	GPL	MEM	PC O-	30	1	0	0	0	0	0		0	0	0
PC O--30:1;0(18:1;0-12:0;0)	PC O-	GPL	MEM	PC O-	30	1	0	0	0	0	0		0	0	0
PC O--30:2;0(16:2;0-14:0;0)	PC O-	GPL	MEM	PC O-	30	2	1	0	0	0	0		0	0	0
PC O--30:3;0(16:0;0-14:3;0)	PC O-	GPL	MEM	PC O-	30	3	2	0	0	0	0		0	0	0
PC O--31:0;0(16:0;0-15:0;0)	PC O-	GPL	MEM	PC O-	31	0	0	0	0.775116	1.14265	0.654596		0	0	0.180751
PC O--31:0;0(17:0;0-14:0;0)	PC O-	GPL	MEM	PC O-	31	0	0	0	1.45589	1.99258	1.39839		0	0	1.0715
PC O--31:0;0(18:0;0-13:0;0)	PC O-	GPL	MEM	PC O-	31	0	0	0	0	0	0		0	0	0
PC O--31:1;0(16:0;0-15:1;0)	PC O-	GPL	MEM	PC O-	31	1	0	0	0	0	0		0	0	0
PC O--31:1;0(16:1;0-15:0;0)	PC O-	GPL	MEM	PC O-	31	1	0	0	0.445555	1.27369	0.568072		0	0	0
PC O--31:1;0(17:0;0-14:1;0)	PC O-	GPL	MEM	PC O-	31	1	0	0	0	0	0		0	0	0
PC O--31:1;0(17:1;0-14:0;0)	PC O-	GPL	MEM	PC O-	31	1	0	0	1.40835	2.39522	1.18103		0	0	0
PC O--31:2;0(17:2;0-14:0;0)	PC O-	GPL	MEM	PC O-	31	2	1	0	0	0	0		0	0	0
PC O--31:3;0(17:0;0-14:3;0)	PC O-	GPL	MEM	PC O-	31	3	2	0	0	0	0		0	0	0
PC O--31:5;0(16:1;0-15:4;0)	PC O-	GPL	MEM	PC O-	31	5	4	0	0	0	0		0	0	0
PC O--31:5;0(17:2;0-14:3;0)	PC O-	GPL	MEM	PC O-	31	5	4	0	0	0	0		0	0	0
PC O--32:0;0(16:0;0-16:0;0)	PC O-	GPL	MEM	PC O-	32	0	0	0	0.965452	1.51629	0.987196		6.07521	4.58462	8.04115
PC O--32:0;0(17:0;0-15:0;0)	PC O-	GPL	MEM	PC O-	32	0	0	0	0.357997	0.582137	0.363805		1.16825	0.855565	1.23222
PC O--32:0;0(18:0;0-14:0;0)	PC O-	GPL	MEM	PC O-	32	0	0	0	0.504191	0.684152	0.491559		1.59395	1.38573	1.93491
PC O--32:1;0(16:0;0-16:1;0)	PC O-	GPL	MEM	PC O-	32	1	0	0	21.3453	29.0002	18.3523		7.20391	5.18332	7.86578
PC O--32:1;0(16:1;0-16:0;0)	PC O-	GPL	MEM	PC O-	32	1	0	0	4.39898	6.40703	3.41071		3.84967	2.74197	3.96099
PC O--32:1;0(17:0;0-15:1;0)	PC O-	GPL	MEM	PC O-	32	1	0	0	0.103336	0	0.098785		0	0	0
PC O--32:1;0(17:1;0-15:0;0)	PC O-	GPL	MEM	PC O-	32	1	0	0	0.651421	0.883229	0.565777		0.253894	0.18814	0.179263
PC O--32:1;0(18:0;0-14:1;0)	PC O-	GPL	MEM	PC O-	32	1	0	0	0	0	0.083121		0	0	0
PC O--32:1;0(18:1;0-14:0;0)	PC O-	GPL	MEM	PC O-	32	1	0	0	4.83978	6.80888	4.1039		2.21175	1.61724	2.49023
PC O--32:2;0(16:0;0-16:2;0)	PC O-	GPL	MEM	PC O-	32	2	1	0	0.699332	0.597171	0.428769		1.24653	1.29656	1.9346
PC O--32:2;0(16:1;0-16:1;0)	PC O-	GPL	MEM	PC O-	32	2	1	0	5.77101	7.91003	5.08877		17.3477	13.7232	19.9893
PC O--32:2;0(16:2;0-16:0;0)	PC O-	GPL	MEM	PC O-	32	2	1	0	0.754529	1.26667	0.713946		11.7168	9.6514	16.3916
PC O--32:2;0(17:1;0-15:1;0)	PC O-	GPL	MEM	PC O-	32	2	1	0	0	0	0		0	0	0
PC O--32:2;0(17:2;0-15:0;0)	PC O-	GPL	MEM	PC O-	32	2	1	0	0	0	0		0	0	0
PC O--32:2;0(18:1;0-14:1;0)	PC O-	GPL	MEM	PC O-	32	2	1	0	0	0	0		0	0	0
PC O--32:2;0(18:2;0-14:0;0)	PC O-	GPL	MEM	PC O-	32	2	1	0	0.322378	1.01304	0.415555		1.46109	1.58602	1.39053
PC O--32:3;0(16:2;0-16:1;0)	PC O-	GPL	MEM	PC O-	32	3	2	0	1.90341	2.62206	1.50468		6.40906	0	0
PC O--32:3;0(18:0;0-14:3;0)	PC O-	GPL	MEM	PC O-	32	3	2	0	0	0	0		0	5.29417	0
PC O--33:0;0(16:0;0-17:0;0)	PC O-	GPL	MEM	PC O-	33	0	0	0	0.250038	0.380275	0.176245		0	0	0
PC O--33:0;0(17:0;0-16:0;0)	PC O-	GPL	MEM	PC O-	33	0	0	0	1.2577	1.77827	0.865334		0	0	0
PC O--33:0;0(18:0;0-15:0;0)	PC O-	GPL	MEM	PC O-	33	0	0	0	0.112084	0.166231	0.069962		0	0	0
PC O--33:1;0(16:0;0-17:1;0)	PC O-	GPL	MEM	PC O-	33	1	0	0	0.452752	0.644608	0.377782		0.162112	0.143797	0.2212
PC O--33:1;0(16:1;0-17:0;0)	PC O-	GPL	MEM	PC O-	33	1	0	0	0.096635	0.131156	0.073863		0.076111	0.066845	0.076909
PC O--33:1;0(17:0;0-16:1;0)	PC O-	GPL	MEM	PC O-	33	1	0	0	7.63553	11.5516	6.49287		5.0734	4.08358	5.93941
PC O--33:1;0(17:1;0-16:0;0)	PC O-	GPL	MEM	PC O-	33	1	0	0	3.8927	5.88125	3.31902		3.47049	2.78485	4.03782
PC O--33:1;0(18:1;0-15:0;0)	PC O-	GPL	MEM	PC O-	33	1	0	0	0.312822	0.546116	0.237069		0.151442	0.107604	0.178357
PC O--33:2;0(16:1;0-17:1;0)	PC O-	GPL	MEM	PC O-	33	2	1	0	0.143066	0.210943	0.167563		0	0	0
PC O--33:2;0(16:2;0-17:0;0)	PC O-	GPL	MEM	PC O-	33	2	1	0	0.040729	0	0		0	0	0
PC O--33:2;0(17:0;0-16:2;0)	PC O-	GPL	MEM	PC O-	33	2	1	0	0.213463	0.321523	0.209871		0	0	0
PC O--33:2;0(17:1;0-16:1;0)	PC O-	GPL	MEM	PC O-	33	2	1	0	2.17013	3.11432	2.09487		0	0	0
PC O--33:2;0(17:2;0-16:0;0)	PC O-	GPL	MEM	PC O-	33	2	1	0	0.299601	0.391741	0.244955		0	0	0
PC O--33:2;0(18:1;0-15:1;0)	PC O-	GPL	MEM	PC O-	33	2	1	0	0.032359	0.070118	0		0	0	0
PC O--33:2;0(18:2;0-15:0;0)	PC O-	GPL	MEM	PC O-	33	2	1	0	0	0.075918	0		0	0	0
PC O--33:3;0(17:2;0-16:1;0)	PC O-	GPL	MEM	PC O-	33	3	2	0	0	1.20937	0		0	0	0
PC O--34:0;0(16:0;0-18:0;0)	PC O-	GPL	MEM	PC O-	34	0	0	0	0	0	0		0	0	0
PC O--34:0;0(17:0;0-17:0;0)	PC O-	GPL	MEM	PC O-	34	0	0	0	0	0	0		0	0	0
PC O--34:0;0(18:0;0-16:0;0)	PC O-	GPL	MEM	PC O-	34	0	0	0	0	0	0		0	0	0
PC O--34:1;0(16:0;0-18:1;0)	PC O-	GPL	MEM	PC O-	34	1	0	0	75.6852	109.686	66.0946		49.5358	35.2607	55.5315
PC O--34:1;0(16:1;0-18:0;0)	PC O-	GPL	MEM	PC O-	34	1	0	0	0	0	0.555897		1.69737	1.00831	2.22899
PC O--34:1;0(17:0;0-17:1;0)	PC O-	GPL	MEM	PC O-	34	1	0	0	13.0166	18.5948	10.6122		9.27727	6.42495	10.2577
PC O--34:1;0(17:1;0-17:0;0)	PC O-	GPL	MEM	PC O-	34	1	0	0	1.56071	2.27607	1.40681		1.06897	0.903421	1.48418
PC O--34:1;0(18:0;0-16:1;0)	PC O-	GPL	MEM	PC O-	34	1	0	0	12.2694	18.6658	10.9841		7.17281	5.02144	7.8396
PC O--34:1;0(18:1;0-16:0;0)	PC O-	GPL	MEM	PC O-	34	1	0	0	80.6313	116.883	69.25		88.6535	66.3484	100.321
PC O--34:2;0(16:0;0-18:2;0)	PC O-	GPL	MEM	PC O-	34	2	1	0	3.56092	5.31341	3.27466		2.35472	1.75191	2.37816
PC O--34:2;0(16:1;0-18:1;0)	PC O-	GPL	MEM	PC O-	34	2	1	0	11.3814	16.9718	9.7877		7.5304	5.58081	8.2346
PC O--34:2;0(16:2;0-18:0;0)	PC O-	GPL	MEM	PC O-	34	2	1	0	1.44966	1.87377	1.09066		4.3336	3.21733	5.19033
PC O--34:2;0(17:0;0-17:2;0)	PC O-	GPL	MEM	PC O-	34	2	1	0	0.092801	0.132281	0.093537		0	0	0
PC O--34:2;0(17:1;0-17:1;0)	PC O-	GPL	MEM	PC O-	34	2	1	0	1.19248	1.91769	1.00997		0.980422	0.459892	0.533245
PC O--34:2;0(17:2;0-17:0;0)	PC O-	GPL	MEM	PC O-	34	2	1	0	0	0	0.075545		0.166529	0.261444	0.159265
PC O--34:2;0(18:0;0-16:2;0)	PC O-	GPL	MEM	PC O-	34	2	1	0	0.150235	0.117213	0		0	0	0.087423
PC O--34:2;0(18:1;0-16:1;0)	PC O-	GPL	MEM	PC O-	34	2	1	0	21.7953	30.7585	18.7145		8.85463	6.84507	10.0876
PC O--34:2;0(18:2;0-16:0;0)	PC O-	GPL	MEM	PC O-	34	2	1	0	2.5908	3.66702	2.28739		1.79895	1.47048	2.19446
PC O--34:3;0(16:0;0-18:3;0)	PC O-	GPL	MEM	PC O-	34	3	2	0	0.06856	0.067058	0		0.133512	0.038169	0
PC O--34:3;0(16:1;0-18:2;0)	PC O-	GPL	MEM	PC O-	34	3	2	0	0.295904	0.390503	0.240664		0.287719	0.203079	0.405402
PC O--34:3;0(16:2;0-18:1;0)	PC O-	GPL	MEM	PC O-	34	3	2	0	1.76294	2.57774	1.4987		2.49383	1.52586	2.62106
PC O--34:3;0(17:2;0-17:1;0)	PC O-	GPL	MEM	PC O-	34	3	2	0	0	0	0		0	0	0
PC O--34:3;0(18:1;0-16:2;0)	PC O-	GPL	MEM	PC O-	34	3	2	0	0.193763	0.32332	0.086691		0.102792	0.061166	0.068243
PC O--34:3;0(18:2;0-16:1;0)	PC O-	GPL	MEM	PC O-	34	3	2	0	0.791344	1.18913	0.754631		0.551346	0.3428	0.461761
PC O--34:4;0(16:2;0-18:2;0)	PC O-	GPL	MEM	PC O-	34	4	3	0	0	0	0		0	0	2.86891
PC O--35:1;0(16:0;0-19:1;0)	PC O-	GPL	MEM	PC O-	35	1	0	0	0.010358	0.025389	0.008376		0.003649	0.003301	0.00581
PC O--35:1;0(17:0;0-18:1;0)	PC O-	GPL	MEM	PC O-	35	1	0	0	11.8624	17.7926	9.88907		4.53666	4.22142	7.73337
PC O--35:1;0(17:1;0-18:0;0)	PC O-	GPL	MEM	PC O-	35	1	0	0	0.095494	0.154455	0.07824		0.048624	0.046883	0.08754
PC O--35:1;0(18:0;0-17:1;0)	PC O-	GPL	MEM	PC O-	35	1	0	0	0.065921	0.111625	0.046514		0.018607	0.01583	0.032538
PC O--35:1;0(18:1;0-17:0;0)	PC O-	GPL	MEM	PC O-	35	1	0	0	0.145845	0.198505	0.125522		0.033658	0.029467	0.053272
PC O--35:2;0(16:0;0-19:2;0)	PC O-	GPL	MEM	PC O-	35	2	1	0	0.035127	0.030163	0		0	0	0
PC O--35:2;0(16:1;0-19:1;0)	PC O-	GPL	MEM	PC O-	35	2	1	0	0.01868	0	0		0	0	0
PC O--35:2;0(16:2;0-19:0;0)	PC O-	GPL	MEM	PC O-	35	2	1	0	0	0	0		0	0	0
PC O--35:2;0(17:0;0-18:2;0)	PC O-	GPL	MEM	PC O-	35	2	1	0	2.54946	3.77037	2.34911		1.50984	1.30509	1.73766
PC O--35:2;0(17:1;0-18:1;0)	PC O-	GPL	MEM	PC O-	35	2	1	0	8.88552	12.703	8.39164		4.66205	3.40161	4.96204
PC O--35:2;0(17:2;0-18:0;0)	PC O-	GPL	MEM	PC O-	35	2	1	0	0.265065	0.378587	0.238555		0.66921	0.486039	0.800299
PC O--35:2;0(18:1;0-17:1;0)	PC O-	GPL	MEM	PC O-	35	2	1	0	0.889086	1.24259	0.879515		0.236766	0.198295	0.264485
PC O--35:2;0(18:2;0-17:0;0)	PC O-	GPL	MEM	PC O-	35	2	1	0	0.068675	0.056268	0.019907		0.019856	0	0
PC O--35:3;0(17:0;0-18:3;0)	PC O-	GPL	MEM	PC O-	35	3	2	0	0.194707	0.266114	0.13451		0.121764	0.077123	0
PC O--35:3;0(17:1;0-18:2;0)	PC O-	GPL	MEM	PC O-	35	3	2	0	0.526685	0.908825	0.445413		0.20439	0.194064	0
PC O--35:3;0(17:2;0-18:1;0)	PC O-	GPL	MEM	PC O-	35	3	2	0	0.948564	1.68278	0.876255		0.977391	0.787681	0
PC O--35:3;0(18:2;0-17:1;0)	PC O-	GPL	MEM	PC O-	35	3	2	0	0.080204	0.259019	0.155082		0.046929	0.033224	0
PC O--35:4;0(17:2;0-18:2;0)	PC O-	GPL	MEM	PC O-	35	4	3	0	0	0	0		0	0	0
PC O--36:0;0(16:0;0-20:0;0)	PC O-	GPL	MEM	PC O-	36	0	0	0	0	0	0		0	0	0
PC O--36:0;0(17:0;0-19:0;0)	PC O-	GPL	MEM	PC O-	36	0	0	0	0	0	0		0	0	0
PC O--36:0;0(18:0;0-18:0;0)	PC O-	GPL	MEM	PC O-	36	0	0	0	0	0	0		0	0	0
PC O--36:1;0(16:0;0-20:1;0)	PC O-	GPL	MEM	PC O-	36	1	0	0	3.92807	5.34474	3.33934		3.60237	2.7577	4.09942
PC O--36:1;0(16:1;0-20:0;0)	PC O-	GPL	MEM	PC O-	36	1	0	0	0	0	0		0.118354	0.091614	0.103131
PC O--36:1;0(17:0;0-19:1;0)	PC O-	GPL	MEM	PC O-	36	1	0	0	0.745793	1.06352	0.588796		0.738433	0.530475	0.758168
PC O--36:1;0(17:1;0-19:0;0)	PC O-	GPL	MEM	PC O-	36	1	0	0	0	0	0		0	0	0
PC O--36:1;0(18:0;0-18:1;0)	PC O-	GPL	MEM	PC O-	36	1	0	0	39.4803	57.2867	33.6713		24.2293	18.428	27.4113
PC O--36:1;0(18:1;0-18:0;0)	PC O-	GPL	MEM	PC O-	36	1	0	0	0	0	0		0	0	0
PC O--36:2;0(16:0;0-20:2;0)	PC O-	GPL	MEM	PC O-	36	2	1	0	3.7807	5.26027	3.27215		1.9823	1.6859	2.26982
PC O--36:2;0(16:1;0-20:1;0)	PC O-	GPL	MEM	PC O-	36	2	1	0	1.32627	1.43457	1.03841		0.643702	0.510796	0.786382
PC O--36:2;0(16:2;0-20:0;0)	PC O-	GPL	MEM	PC O-	36	2	1	0	0	0	0		0.109047	0.059589	0
PC O--36:2;0(17:0;0-19:2;0)	PC O-	GPL	MEM	PC O-	36	2	1	0	0.489213	0.757815	0.514583		0.197344	0.109185	0.395001
PC O--36:2;0(17:1;0-19:1;0)	PC O-	GPL	MEM	PC O-	36	2	1	0	0.205401	0.283861	0.205844		0.200854	0.10115	0.182307
PC O--36:2;0(18:0;0-18:2;0)	PC O-	GPL	MEM	PC O-	36	2	1	0	4.96325	7.72522	4.48344		2.93974	1.88595	3.60374
PC O--36:2;0(18:1;0-18:1;0)	PC O-	GPL	MEM	PC O-	36	2	1	0	147.062	211.367	126.008		55.9176	41.9981	63.8412
PC O--36:2;0(18:2;0-18:0;0)	PC O-	GPL	MEM	PC O-	36	2	1	0	0	0	0		0.553608	0	0.688496
PC O--36:3;0(16:0;0-20:3;0)	PC O-	GPL	MEM	PC O-	36	3	2	0	1.96822	2.76935	1.57881		2.949	2.40301	3.44911
PC O--36:3;0(16:1;0-20:2;0)	PC O-	GPL	MEM	PC O-	36	3	2	0	0.435993	0.809656	0.375636		0.164877	0.088201	0.182152
PC O--36:3;0(16:2;0-20:1;0)	PC O-	GPL	MEM	PC O-	36	3	2	0	0	0.109835	0.074925		0.097907	0	0
PC O--36:3;0(17:0;0-19:3;0)	PC O-	GPL	MEM	PC O-	36	3	2	0	0	0	0		0	0	0
PC O--36:3;0(17:1;0-19:2;0)	PC O-	GPL	MEM	PC O-	36	3	2	0	0	0	0		0	0	0
PC O--36:3;0(18:0;0-18:3;0)	PC O-	GPL	MEM	PC O-	36	3	2	0	0.103073	0.176169	0		0.083223	0.085077	0
PC O--36:3;0(18:1;0-18:2;0)	PC O-	GPL	MEM	PC O-	36	3	2	0	7.46111	10.949	6.77037		3.61636	3.17596	4.42238
PC O--36:3;0(18:2;0-18:1;0)	PC O-	GPL	MEM	PC O-	36	3	2	0	12.2936	17.3014	10.7985		8.12036	5.56126	8.95504
PC O--36:4;0(16:0;0-20:4;0)	PC O-	GPL	MEM	PC O-	36	4	3	0	2.36768	3.77792	2.22139		3.63838	3.2092	4.4375
PC O--36:4;0(16:1;0-20:3;0)	PC O-	GPL	MEM	PC O-	36	4	3	0	0.657488	1.03188	0.606682		1.22537	1.01477	1.49494
PC O--36:4;0(16:2;0-20:2;0)	PC O-	GPL	MEM	PC O-	36	4	3	0	0.22831	0	0.15505		0	0	0
PC O--36:4;0(18:1;0-18:3;0)	PC O-	GPL	MEM	PC O-	36	4	3	0	0.584148	1.12989	0.59751		0.665394	0.159517	0.349726
PC O--36:4;0(18:2;0-18:2;0)	PC O-	GPL	MEM	PC O-	36	4	3	0	1.60611	2.13502	1.41173		1.43582	1.07502	1.68024
PC O--36:5;0(16:0;0-20:5;0)	PC O-	GPL	MEM	PC O-	36	5	4	0	0.403394	1.24457	0		0	0.374483	0.76287
PC O--36:5;0(16:1;0-20:4;0)	PC O-	GPL	MEM	PC O-	36	5	4	0	1.28982	1.39891	1.28873		2.7901	1.93117	2.70231
PC O--36:5;0(16:2;0-20:3;0)	PC O-	GPL	MEM	PC O-	36	5	4	0	0	0	0		0	0	0
PC O--36:6;0(16:1;0-20:5;0)	PC O-	GPL	MEM	PC O-	36	6	5	0	0	0	0		0	0	0
PC O--36:6;0(16:2;0-20:4;0)	PC O-	GPL	MEM	PC O-	36	6	5	0	0	0	0		0	0	0
PC O--37:1;0(16:0;0-21:1;0)	PC O-	GPL	MEM	PC O-	37	1	0	0	0.03907	0.062369	0.035856		0	0	0.066659
PC O--37:1;0(17:0;0-20:1;0)	PC O-	GPL	MEM	PC O-	37	1	0	0	3.0518	4.13092	2.23886		2.07166	1.27323	2.70362
PC O--37:1;0(17:1;0-20:0;0)	PC O-	GPL	MEM	PC O-	37	1	0	0	0	0.06847	0.036857		0	0	0.059294
PC O--37:1;0(18:0;0-19:1;0)	PC O-	GPL	MEM	PC O-	37	1	0	0	0.215516	0.326418	0.156813		0.070902	0.039407	0.137646
PC O--37:1;0(18:1;0-19:0;0)	PC O-	GPL	MEM	PC O-	37	1	0	0	0	0	0		0	0	0
PC O--37:2;0(17:0;0-20:2;0)	PC O-	GPL	MEM	PC O-	37	2	1	0	0	0	0		0	0	0
PC O--37:2;0(17:1;0-20:1;0)	PC O-	GPL	MEM	PC O-	37	2	1	0	0	0	0		0	0	0
PC O--37:2;0(18:0;0-19:2;0)	PC O-	GPL	MEM	PC O-	37	2	1	0	0	0	0		0	0	0
PC O--37:2;0(18:1;0-19:1;0)	PC O-	GPL	MEM	PC O-	37	2	1	0	0	0	0		0	0	0
PC O--37:3;0(17:0;0-20:3;0)	PC O-	GPL	MEM	PC O-	37	3	2	0	2.05032	3.08588	1.69768		1.50631	0.935789	1.41764
PC O--37:3;0(17:1;0-20:2;0)	PC O-	GPL	MEM	PC O-	37	3	2	0	0.651453	0.884301	0.521302		0.0976	0.084276	0.104542
PC O--37:3;0(17:2;0-20:1;0)	PC O-	GPL	MEM	PC O-	37	3	2	0	0	0.080949	0		0.045622	0	0.025962
PC O--37:3;0(18:1;0-19:2;0)	PC O-	GPL	MEM	PC O-	37	3	2	0	0.244591	0.357344	0.241703		0.038957	0	0
PC O--37:3;0(18:2;0-19:1;0)	PC O-	GPL	MEM	PC O-	37	3	2	0	0	0	0.066315		0	0	0
PC O--37:4;0(17:0;0-20:4;0)	PC O-	GPL	MEM	PC O-	37	4	3	0	1.14806	1.25481	0.813887		1.10022	0.950261	1.75369
PC O--37:4;0(17:1;0-20:3;0)	PC O-	GPL	MEM	PC O-	37	4	3	0	0.384359	0.443308	0.218838		0.35889	0.185159	0
PC O--37:4;0(17:2;0-20:2;0)	PC O-	GPL	MEM	PC O-	37	4	3	0	0	0	0		0	0	0
PC O--37:5;0(17:0;0-20:5;0)	PC O-	GPL	MEM	PC O-	37	5	4	0	0	0.225264	0		0	0	0
PC O--37:5;0(17:1;0-20:4;0)	PC O-	GPL	MEM	PC O-	37	5	4	0	0	0.96566	0		0	0	0
PC O--37:5;0(17:2;0-20:3;0)	PC O-	GPL	MEM	PC O-	37	5	4	0	0	0	0		0	0	0
PC O--38:0;0(18:0;0-20:0;0)	PC O-	GPL	MEM	PC O-	38	0	0	0	0	0	0		0	0	0
PC O--38:1;0(16:0;0-22:1;0)	PC O-	GPL	MEM	PC O-	38	1	0	0	1.37907	1.95342	1.33089		2.26471	1.50319	2.36359
PC O--38:1;0(16:1;0-22:0;0)	PC O-	GPL	MEM	PC O-	38	1	0	0	0	0	0		0.190405	0.107181	0.223863
PC O--38:1;0(17:0;0-21:1;0)	PC O-	GPL	MEM	PC O-	38	1	0	0	0	0	0		0	0	0
PC O--38:1;0(18:0;0-20:1;0)	PC O-	GPL	MEM	PC O-	38	1	0	0	7.15936	9.41415	5.53073		3.75379	3.04786	4.31409
PC O--38:1;0(18:1;0-20:0;0)	PC O-	GPL	MEM	PC O-	38	1	0	0	0	0	0.504562		0.669178	0.601003	0.89978
PC O--38:2;0(16:0;0-22:2;0)	PC O-	GPL	MEM	PC O-	38	2	1	0	0.178206	0.173607	0.11498		0.371459	0.235829	0.408011
PC O--38:2;0(16:1;0-22:1;0)	PC O-	GPL	MEM	PC O-	38	2	1	0	0.169431	0.178005	0.161284		0.330983	0.088952	0.371701
PC O--38:2;0(16:2;0-22:0;0)	PC O-	GPL	MEM	PC O-	38	2	1	0	0	0	0		0.088281	0	0
PC O--38:2;0(17:0;0-21:2;0)	PC O-	GPL	MEM	PC O-	38	2	1	0	0	0	0		0	0	0
PC O--38:2;0(18:0;0-20:2;0)	PC O-	GPL	MEM	PC O-	38	2	1	0	3.57987	5.00137	3.07829		1.45862	0.82941	1.58608
PC O--38:2;0(18:1;0-20:1;0)	PC O-	GPL	MEM	PC O-	38	2	1	0	7.73111	9.88796	6.84761		3.12931	2.1216	3.60185
PC O--38:3;0(16:0;0-22:3;0)	PC O-	GPL	MEM	PC O-	38	3	2	0	0	0	0		0.102017	0.16181	0.094263
PC O--38:3;0(16:1;0-22:2;0)	PC O-	GPL	MEM	PC O-	38	3	2	0	0	0.119594	0		0	0	0
PC O--38:3;0(16:2;0-22:1;0)	PC O-	GPL	MEM	PC O-	38	3	2	0	0	0	0		0	0.050245	0
PC O--38:3;0(17:0;0-21:3;0)	PC O-	GPL	MEM	PC O-	38	3	2	0	0	0	0		0	0	0
PC O--38:3;0(18:0;0-20:3;0)	PC O-	GPL	MEM	PC O-	38	3	2	0	2.5229	4.02416	2.17412		2.95177	2.37649	2.91283
PC O--38:3;0(18:1;0-20:2;0)	PC O-	GPL	MEM	PC O-	38	3	2	0	5.48121	8.87223	4.68103		1.74954	1.14299	1.44855
PC O--38:3;0(18:2;0-20:1;0)	PC O-	GPL	MEM	PC O-	38	3	2	0	0.651482	1.30246	0.522868		0.307199	0.363655	0.347738
PC O--38:4;0(16:0;0-22:4;0)	PC O-	GPL	MEM	PC O-	38	4	3	0	0.396327	0.318614	0.35507		1.09658	0.810657	1.16088
PC O--38:4;0(18:0;0-20:4;0)	PC O-	GPL	MEM	PC O-	38	4	3	0	2.37075	3.42684	1.96344		3.08505	2.05868	3.6438
PC O--38:4;0(18:1;0-20:3;0)	PC O-	GPL	MEM	PC O-	38	4	3	0	7.44569	10.9902	6.52735		9.67455	6.62287	11.4879
PC O--38:4;0(18:2;0-20:2;0)	PC O-	GPL	MEM	PC O-	38	4	3	0	0.801225	1.05346	0.577068		0.288751	0.33974	0.378591
PC O--38:5;0(16:0;0-22:5;0)	PC O-	GPL	MEM	PC O-	38	5	4	0	0.252221	0	0.235014		1.62531	1.07165	1.64387
PC O--38:5;0(16:1;0-22:4;0)	PC O-	GPL	MEM	PC O-	38	5	4	0	0	0	0		0.404987	0	0.420125
PC O--38:5;0(18:0;0-20:5;0)	PC O-	GPL	MEM	PC O-	38	5	4	0	0.353634	0.496639	0.464011		0.559707	0.38729	0.648101
PC O--38:5;0(18:1;0-20:4;0)	PC O-	GPL	MEM	PC O-	38	5	4	0	14.0704	19.13	11.3282		10.8967	9.47342	14.2237
PC O--38:5;0(18:2;0-20:3;0)	PC O-	GPL	MEM	PC O-	38	5	4	0	1.08665	2.27292	0.930534		2.52347	2.11282	2.7897
PC O--38:6;0(16:0;0-22:6;0)	PC O-	GPL	MEM	PC O-	38	6	5	0	0	0	0		0	0	0
PC O--38:6;0(16:1;0-22:5;0)	PC O-	GPL	MEM	PC O-	38	6	5	0	0	0	0		0	0	0
PC O--38:6;0(16:2;0-22:4;0)	PC O-	GPL	MEM	PC O-	38	6	5	0	0	0	0		0	0	0
PC O--38:6;0(18:1;0-20:5;0)	PC O-	GPL	MEM	PC O-	38	6	5	0	2.04132	3.22064	1.97745		1.60402	1.00919	2.77773
PC O--38:6;0(18:2;0-20:4;0)	PC O-	GPL	MEM	PC O-	38	6	5	0	2.40659	3.49917	2.04609		3.72514	3.40042	3.95251
PC O--38:7;0(16:1;0-22:6;0)	PC O-	GPL	MEM	PC O-	38	7	6	0	0	0	0		0	0	0
PC O--38:7;0(18:2;0-20:5;0)	PC O-	GPL	MEM	PC O-	38	7	6	0	0	0	0		0	0	0
PC O--39:5;0(17:0;0-22:5;0)	PC O-	GPL	MEM	PC O-	39	5	4	0	0	0	0		0	0	0
PC O--39:5;0(17:1;0-22:4;0)	PC O-	GPL	MEM	PC O-	39	5	4	0	0	0	0		0	0	0
PC O--39:6;0(17:0;0-22:6;0)	PC O-	GPL	MEM	PC O-	39	6	5	0	0	0	0		0	0	0
PC O--39:6;0(17:1;0-22:5;0)	PC O-	GPL	MEM	PC O-	39	6	5	0	0	0	0		0	0	0
PC O--40:0;0(16:0;0-24:0;0)	PC O-	GPL	MEM	PC O-	40	0	0	0	0	0	0		0	0	0
PC O--40:0;0(18:0;0-22:0;0)	PC O-	GPL	MEM	PC O-	40	0	0	0	0	0	0		0	1.66496	3.16203
PC O--40:1;0(16:0;0-24:1;0)	PC O-	GPL	MEM	PC O-	40	1	0	0	0.31169	0	0.201031		0.456448	0.166648	0.345919
PC O--40:1;0(16:1;0-24:0;0)	PC O-	GPL	MEM	PC O-	40	1	0	0	0.320945	0.749117	0.264024		0.930638	0.514353	1.11038
PC O--40:1;0(18:0;0-22:1;0)	PC O-	GPL	MEM	PC O-	40	1	0	0	1.70766	3.55186	1.49406		3.0063	2.20691	3.99376
PC O--40:1;0(18:1;0-22:0;0)	PC O-	GPL	MEM	PC O-	40	1	0	0	0	0	0		0	0	0.242356
PC O--40:2;0(16:0;0-24:2;0)	PC O-	GPL	MEM	PC O-	40	2	1	0	0	0	0		0	0	0
PC O--40:2;0(16:1;0-24:1;0)	PC O-	GPL	MEM	PC O-	40	2	1	0	0	0	0		0	0	0
PC O--40:2;0(16:2;0-24:0;0)	PC O-	GPL	MEM	PC O-	40	2	1	0	0	0	0		0	0	0
PC O--40:2;0(18:0;0-22:2;0)	PC O-	GPL	MEM	PC O-	40	2	1	0	0	0	0		0	0	0
PC O--40:2;0(18:1;0-22:1;0)	PC O-	GPL	MEM	PC O-	40	2	1	0	0	0	0		0	0	0
PC O--40:3;0(16:2;0-24:1;0)	PC O-	GPL	MEM	PC O-	40	3	2	0	0	0	0		0	0	0
PC O--40:4;0(16:0;0-24:4;0)	PC O-	GPL	MEM	PC O-	40	4	3	0	0	0	0		0.118465	0	0
PC O--40:4;0(18:0;0-22:4;0)	PC O-	GPL	MEM	PC O-	40	4	3	0	0.788895	1.33259	0		0.990482	0	1.52098
PC O--40:4;0(18:1;0-22:3;0)	PC O-	GPL	MEM	PC O-	40	4	3	0	0.226936	0.237688	0		0.494537	0	0.398436
PC O--40:4;0(18:2;0-22:2;0)	PC O-	GPL	MEM	PC O-	40	4	3	0	0	0	0		0	0	0
PC O--40:5;0(16:0;0-24:5;0)	PC O-	GPL	MEM	PC O-	40	5	4	0	0	0	0		0	0	0
PC O--40:5;0(16:1;0-24:4;0)	PC O-	GPL	MEM	PC O-	40	5	4	0	0	0	0		0	0	0
PC O--40:5;0(18:0;0-22:5;0)	PC O-	GPL	MEM	PC O-	40	5	4	0	0.735455	0.406485	0.45413		1.33094	1.02267	1.28487
PC O--40:5;0(18:1;0-22:4;0)	PC O-	GPL	MEM	PC O-	40	5	4	0	1.87733	2.53759	1.92613		2.99989	2.25947	3.23736
PC O--40:6;0(16:0;0-24:6;0)	PC O-	GPL	MEM	PC O-	40	6	5	0	0	0	0		0	0	0
PC O--40:6;0(18:0;0-22:6;0)	PC O-	GPL	MEM	PC O-	40	6	5	0	0	0	0		0	0	0
PC O--40:6;0(18:1;0-22:5;0)	PC O-	GPL	MEM	PC O-	40	6	5	0	2.83747	4.2097	2.23845		4.84994	3.36258	5.27161
PC O--40:6;0(18:2;0-22:4;0)	PC O-	GPL	MEM	PC O-	40	6	5	0	0	0	0		0.761766	0.614636	0.977688
PC O--40:7;0(16:1;0-24:6;0)	PC O-	GPL	MEM	PC O-	40	7	6	0	0	0	0		0	0	0
PC O--40:7;0(18:1;0-22:6;0)	PC O-	GPL	MEM	PC O-	40	7	6	0	0	2.02558	0		0	0	0
PC O--40:7;0(18:2;0-22:5;0)	PC O-	GPL	MEM	PC O-	40	7	6	0	0	0	0		0	0	0
PC O--42:0;0(18:0;0-24:0;0)	PC O-	GPL	MEM	PC O-	42	0	0	0	0	0	0		0	0	0
PC O--42:1;0(18:0;0-24:1;0)	PC O-	GPL	MEM	PC O-	42	1	0	0	0	0	0		0	0	0
PC O--42:2;0(18:0;0-24:2;0)	PC O-	GPL	MEM	PC O-	42	2	1	0	0	0	0		0	0	0
PC O--42:2;0(18:1;0-24:1;0)	PC O-	GPL	MEM	PC O-	42	2	1	0	0	0	0		0	0	0
PC O--42:6;0(18:0;0-24:6;0)	PC O-	GPL	MEM	PC O-	42	6	5	0	0	0	0		0	0	0
PC O--42:6;0(18:1;0-24:5;0)	PC O-	GPL	MEM	PC O-	42	6	5	0	0	0	0		0	0	0
PE-30:0;0(12:0;0-18:0;0)	PE	GPL	MEM	PE	30	0	0	0	0	0	0		0	0	0
PE-30:0;0(14:0;0-16:0;0)	PE	GPL	MEM	PE	30	0	0	0	0	0	0		0	0	0
PE-30:0;0(15:0;0-15:0;0)	PE	GPL	MEM	PE	30	0	0	0	0	0	0		0	0	0
PE-30:1;0(12:0;0-18:1;0)	PE	GPL	MEM	PE	30	1	1	0	0	0	0		0	0	0
PE-30:1;0(14:0;0-16:1;0)	PE	GPL	MEM	PE	30	1	1	0	0	0	0		0	0	0
PE-30:1;0(14:1;0-16:0;0)	PE	GPL	MEM	PE	30	1	1	0	0	0	0		0	0	0
PE-31:0;0(14:0;0-17:0;0)	PE	GPL	MEM	PE	31	0	0	0	0	0	0		0	0	0
PE-31:0;0(15:0;0-16:0;0)	PE	GPL	MEM	PE	31	0	0	0	0	0	0		0	0	0
PE-31:1;0(13:0;0-18:1;0)	PE	GPL	MEM	PE	31	1	1	0	0	0	0		0	0	0
PE-32:0;0(14:0;0-18:0;0)	PE	GPL	MEM	PE	32	0	0	0	0	0	0		0	0	0
PE-32:0;0(15:0;0-17:0;0)	PE	GPL	MEM	PE	32	0	0	0	0	0	0		0	0	0
PE-32:0;0(16:0;0-16:0;0)	PE	GPL	MEM	PE	32	0	0	0	0	0	0		0	0	0
PE-32:1;0(14:0;0-18:1;0)	PE	GPL	MEM	PE	32	1	1	0	0.25014	0.2484	0.166764		0.264598	0	0.280981
PE-32:1;0(14:1;0-18:0;0)	PE	GPL	MEM	PE	32	1	1	0	0	0	0		0	0	0
PE-32:1;0(15:0;0-17:1;0)	PE	GPL	MEM	PE	32	1	1	0	0	0.07353	0		0	0	0
PE-32:1;0(16:1;0-16:0;0)	PE	GPL	MEM	PE	32	1	1	0	1.27647	1.40183	1.28403		1.24577	1.49833	1.57223
PE-32:2;0(14:0;0-18:2;0)	PE	GPL	MEM	PE	32	2	2	0	0	0	0		0	0	0
PE-32:2;0(14:1;0-18:1;0)	PE	GPL	MEM	PE	32	2	2	0	0	0	0		0	0	0
PE-32:2;0(16:1;0-16:1;0)	PE	GPL	MEM	PE	32	2	2	0	0	0	0		0	0	0
PE-32:2;0(16:2;0-16:0;0)	PE	GPL	MEM	PE	32	2	2	0	0	0	0		0	0	0
PE-33:0;0(15:0;0-18:0;0)	PE	GPL	MEM	PE	33	0	0	0	0	0	0		0	0	0
PE-33:0;0(16:0;0-17:0;0)	PE	GPL	MEM	PE	33	0	0	0	3.94911	3.95475	3.85557		4.03514	3.75125	3.67045
PE-33:1;0(16:0;0-17:1;0)	PE	GPL	MEM	PE	33	1	1	0	0.732119	0.434214	0		0	1.06618	0
PE-33:2;0(15:0;0-18:2;0)	PE	GPL	MEM	PE	33	2	2	0	0	0	0		0	0	0
PE-33:2;0(16:1;0-17:1;0)	PE	GPL	MEM	PE	33	2	2	0	1.2735	1.54171	1.42805		1.13884	1.16759	1.78098
PE-34:0;0(16:0;0-18:0;0)	PE	GPL	MEM	PE	34	0	0	0	0	0	0		0	0	0
PE-34:1;0(14:0;0-20:1;0)	PE	GPL	MEM	PE	34	1	1	0	0	0	0		0	0	0
PE-34:1;0(15:0;0-19:1;0)	PE	GPL	MEM	PE	34	1	1	0	0	0	0		0	0	0
PE-34:1;0(16:0;0-18:1;0)	PE	GPL	MEM	PE	34	1	1	0	12.4702	12.8239	11.6072		13.6871	13.2531	14.9303
PE-34:1;0(16:1;0-18:0;0)	PE	GPL	MEM	PE	34	1	1	0	3.0354	3.18883	3.12475		2.91359	2.69345	3.11251
PE-34:1;0(17:1;0-17:0;0)	PE	GPL	MEM	PE	34	1	1	0	0.464949	0.552215	0.435186		0.240741	0.206457	0.289562
PE-34:2;0(14:0;0-20:2;0)	PE	GPL	MEM	PE	34	2	2	0	0	0	0		0	0	0
PE-34:2;0(16:0;0-18:2;0)	PE	GPL	MEM	PE	34	2	2	0	0.717114	0.764873	0.574126		0.916902	0.95627	1.03573
PE-34:2;0(16:1;0-18:1;0)	PE	GPL	MEM	PE	34	2	2	0	7.60121	7.90261	7.20566		6.06347	5.18136	6.34417
PE-34:2;0(16:2;0-18:0;0)	PE	GPL	MEM	PE	34	2	2	0	0	0	0		0	0	0
PE-34:2;0(17:1;0-17:1;0)	PE	GPL	MEM	PE	34	2	2	0	0.458756	0.495928	0.419234		0.284355	0.219328	0.422775
PE-34:3;0(14:0;0-20:3;0)	PE	GPL	MEM	PE	34	3	3	0	0	0	0		0	0	0
PE-34:3;0(16:0;0-18:3;0)	PE	GPL	MEM	PE	34	3	3	0	0	0	0		0	0	0
PE-34:3;0(16:1;0-18:2;0)	PE	GPL	MEM	PE	34	3	3	0	0	0	0		0	0	0
PE-34:3;0(16:2;0-18:1;0)	PE	GPL	MEM	PE	34	3	3	0	0	0	0		0	0	0
PE-34:4;0(14:0;0-20:4;0)	PE	GPL	MEM	PE	34	4	4	0	0	0	0		0	0	0
PE-34:4;0(16:1;0-18:3;0)	PE	GPL	MEM	PE	34	4	4	0	0	0	0		0	0	0
PE-35:1;0(15:0;0-20:1;0)	PE	GPL	MEM	PE	35	1	1	0	0	0	0		0	0	0
PE-35:1;0(16:0;0-19:1;0)	PE	GPL	MEM	PE	35	1	1	0	0	0	0		0	0.117795	0
PE-35:1;0(17:0;0-18:1;0)	PE	GPL	MEM	PE	35	1	1	0	3.59877	3.56744	3.31492		2.65032	2.32579	2.55963
PE-35:1;0(17:1;0-18:0;0)	PE	GPL	MEM	PE	35	1	1	0	0	0	0		0	0	0
PE-35:2;0(16:0;0-19:2;0)	PE	GPL	MEM	PE	35	2	2	0	0	0	0		0	0	0
PE-35:2;0(16:1;0-19:1;0)	PE	GPL	MEM	PE	35	2	2	0	0.024167	0.025706	0		0	0	0
PE-35:2;0(17:0;0-18:2;0)	PE	GPL	MEM	PE	35	2	2	0	0	0	0		0	0.038015	0.054637
PE-35:2;0(17:1;0-18:1;0)	PE	GPL	MEM	PE	35	2	2	0	3.62867	3.78191	3.33278		3.0956	2.56235	3.92923
PE-35:2;0(17:2;0-18:0;0)	PE	GPL	MEM	PE	35	2	2	0	0	0	0		0	0	0
PE-35:3;0(17:1;0-18:2;0)	PE	GPL	MEM	PE	35	3	3	0	0	0	0		0	0	0
PE-35:4;0(15:0;0-20:4;0)	PE	GPL	MEM	PE	35	4	4	0	0	0	0		0	0	0
PE-35:4;0(17:1;0-18:3;0)	PE	GPL	MEM	PE	35	4	4	0	0	0	0		0	0	0
PE-36:1;0(16:0;0-20:1;0)	PE	GPL	MEM	PE	36	1	1	0	0.681416	0.811123	0.644166		0.436914	0.37838	0.517087
PE-36:1;0(16:1;0-20:0;0)	PE	GPL	MEM	PE	36	1	1	0	0	0	0		0	0.127912	0
PE-36:1;0(17:0;0-19:1;0)	PE	GPL	MEM	PE	36	1	1	0	0.097658	0	0.078858		0	0	0
PE-36:1;0(18:1;0-18:0;0)	PE	GPL	MEM	PE	36	1	1	0	28.7877	30.2168	29.0454		23.4927	21.7348	24.4165
PE-36:2;0(16:0;0-20:2;0)	PE	GPL	MEM	PE	36	2	2	0	0.56785	0.819096	0.511207		0.42045	0.431928	0.475665
PE-36:2;0(16:1;0-20:1;0)	PE	GPL	MEM	PE	36	2	2	0	1.33116	1.55633	1.15594		1.07307	1.01373	1.10473
PE-36:2;0(17:1;0-19:1;0)	PE	GPL	MEM	PE	36	2	2	0	0.426977	0.568268	0.39171		0	0	0.392029
PE-36:2;0(18:1;0-18:1;0)	PE	GPL	MEM	PE	36	2	2	0	84.686	90.7025	79.6812		68.1842	62.5186	73.4222
PE-36:2;0(18:2;0-18:0;0)	PE	GPL	MEM	PE	36	2	2	0	2.28913	2.5116	2.24792		3.78602	3.88555	4.19226
PE-36:3;0(14:0;0-22:3;0)	PE	GPL	MEM	PE	36	3	3	0	0	0	0		0	0	0
PE-36:3;0(16:0;0-20:3;0)	PE	GPL	MEM	PE	36	3	3	0	0.439739	0.418265	0.318497		0.750126	0.744615	0.834497
PE-36:3;0(16:1;0-20:2;0)	PE	GPL	MEM	PE	36	3	3	0	0.395053	0.427064	0.319614		0.232655	0.224687	0
PE-36:3;0(17:1;0-19:2;0)	PE	GPL	MEM	PE	36	3	3	0	0	0	0		0	0	0
PE-36:3;0(18:2;0-18:1;0)	PE	GPL	MEM	PE	36	3	3	0	3.91124	4.07344	3.40217		5.07449	4.97538	6.18578
PE-36:3;0(18:3;0-18:0;0)	PE	GPL	MEM	PE	36	3	3	0	0	0	0		0	0.116862	0
PE-36:4;0(14:0;0-22:4;0)	PE	GPL	MEM	PE	36	4	4	0	0	0	0		0	0	0
PE-36:4;0(16:0;0-20:4;0)	PE	GPL	MEM	PE	36	4	4	0	0.904418	0.854831	0.705198		2.10739	2.33574	2.92472
PE-36:4;0(16:1;0-20:3;0)	PE	GPL	MEM	PE	36	4	4	0	0.438488	0.427395	0.244391		0.880294	0	0
PE-36:4;0(18:2;0-18:2;0)	PE	GPL	MEM	PE	36	4	4	0	0.126693	0.078137	0.096286		0.101151	0.319764	0.241886
PE-36:4;0(18:3;0-18:1;0)	PE	GPL	MEM	PE	36	4	4	0	0	0.406586	0.348158		0.354149	0.477197	0.632634
PE-36:5;0(14:0;0-22:5;0)	PE	GPL	MEM	PE	36	5	5	0	0	0	0		0	0	0
PE-36:5;0(16:0;0-20:5;0)	PE	GPL	MEM	PE	36	5	5	0	0.170375	0	0		0	0	0
PE-36:5;0(16:1;0-20:4;0)	PE	GPL	MEM	PE	36	5	5	0	0.24717	0.358385	0		0.67481	0.667979	0.652752
PE-36:5;0(18:3;0-18:2;0)	PE	GPL	MEM	PE	36	5	5	0	0	0	0		0	0	0
PE-36:6;0(16:1;0-20:5;0)	PE	GPL	MEM	PE	36	6	6	0	0	0	0		0	0	0
PE-37:0;0(17:0;0-20:0;0)	PE	GPL	MEM	PE	37	0	0	0	0	0	0		0	0	0
PE-37:1;0(17:0;0-20:1;0)	PE	GPL	MEM	PE	37	1	1	0	0	0	0		0	0	0
PE-37:1;0(17:1;0-20:0;0)	PE	GPL	MEM	PE	37	1	1	0	0	0	0		0	0	0
PE-37:1;0(18:0;0-19:1;0)	PE	GPL	MEM	PE	37	1	1	0	0	0	0		0	0	0
PE-37:1;0(18:1;0-19:0;0)	PE	GPL	MEM	PE	37	1	1	0	0	0	0		0	0	0
PE-37:2;0(15:0;0-22:2;0)	PE	GPL	MEM	PE	37	2	2	0	0	0	0		0	0	0
PE-37:2;0(17:0;0-20:2;0)	PE	GPL	MEM	PE	37	2	2	0	0.527133	0.554679	0.465654		0.322152	0.251974	0.295972
PE-37:2;0(17:1;0-20:1;0)	PE	GPL	MEM	PE	37	2	2	0	0	0	0		0	0	0
PE-37:2;0(18:0;0-19:2;0)	PE	GPL	MEM	PE	37	2	2	0	0.038484	0	0		0	0	0
PE-37:2;0(18:1;0-19:1;0)	PE	GPL	MEM	PE	37	2	2	0	0.999324	1.00316	0.999331		0.607692	0.612439	0.522825
PE-37:3;0(15:0;0-22:3;0)	PE	GPL	MEM	PE	37	3	3	0	0	0	0		0	0	0
PE-37:3;0(16:0;0-21:3;0)	PE	GPL	MEM	PE	37	3	3	0	0	0	0		0	0	0
PE-37:3;0(17:0;0-20:3;0)	PE	GPL	MEM	PE	37	3	3	0	0	0.170323	0		0	0	0
PE-37:3;0(17:1;0-20:2;0)	PE	GPL	MEM	PE	37	3	3	0	0	0	0		0	0	0
PE-37:3;0(18:0;0-19:3;0)	PE	GPL	MEM	PE	37	3	3	0	0	0	0		0	0	0
PE-37:3;0(18:1;0-19:2;0)	PE	GPL	MEM	PE	37	3	3	0	0	0.200035	0		0	0	0
PE-37:3;0(18:2;0-19:1;0)	PE	GPL	MEM	PE	37	3	3	0	0	0	0		0	0	0
PE-37:4;0(15:0;0-22:4;0)	PE	GPL	MEM	PE	37	4	4	0	0	0	0		0	0	0
PE-37:4;0(16:1;0-21:3;0)	PE	GPL	MEM	PE	37	4	4	0	0	0	0		0	0	0
PE-37:4;0(17:0;0-20:4;0)	PE	GPL	MEM	PE	37	4	4	0	0	0	0		0.700816	0.691624	0.754624
PE-37:4;0(17:1;0-20:3;0)	PE	GPL	MEM	PE	37	4	4	0	0	0	0		0	0	0
PE-37:4;0(18:1;0-19:3;0)	PE	GPL	MEM	PE	37	4	4	0	0	0	0		0	0	0
PE-37:5;0(15:0;0-22:5;0)	PE	GPL	MEM	PE	37	5	5	0	0	0	0		0	0	0
PE-37:5;0(17:0;0-20:5;0)	PE	GPL	MEM	PE	37	5	5	0	0	0	0		0	0	0
PE-37:5;0(17:1;0-20:4;0)	PE	GPL	MEM	PE	37	5	5	0	0	0	0		0	0	0
PE-38:1;0(16:0;0-22:1;0)	PE	GPL	MEM	PE	38	1	1	0	0.024675	0.040398	0.021359		0	0	0
PE-38:1;0(16:1;0-22:0;0)	PE	GPL	MEM	PE	38	1	1	0	0	0	0		0	0	0
PE-38:1;0(17:0;0-21:1;0)	PE	GPL	MEM	PE	38	1	1	0	0	0.029724	0.026094		0	0	0.041679
PE-38:1;0(18:0;0-20:1;0)	PE	GPL	MEM	PE	38	1	1	0	0	0	0		0.183832	0.147863	0.147199
PE-38:1;0(18:1;0-20:0;0)	PE	GPL	MEM	PE	38	1	1	0	0.367326	0.305501	0.330834		0.497077	0.451255	0.350013
PE-38:2;0(16:0;0-22:2;0)	PE	GPL	MEM	PE	38	2	2	0	0	0.086141	0		0	0	0
PE-38:2;0(16:1;0-22:1;0)	PE	GPL	MEM	PE	38	2	2	0	0	0.174618	0.123247		0.189431	0.087094	0
PE-38:2;0(17:1;0-21:1;0)	PE	GPL	MEM	PE	38	2	2	0	0	0.254406	0		0	0	0
PE-38:2;0(18:0;0-20:2;0)	PE	GPL	MEM	PE	38	2	2	0	1.18118	1.22229	1.05736		0.802263	0.641171	0.800374
PE-38:2;0(18:1;0-20:1;0)	PE	GPL	MEM	PE	38	2	2	0	4.81448	4.94106	4.17019		3.32494	3.02958	4.13176
PE-38:2;0(18:2;0-20:0;0)	PE	GPL	MEM	PE	38	2	2	0	0	0	0		0	0	0
PE-38:2;0(19:1;0-19:1;0)	PE	GPL	MEM	PE	38	2	2	0	0	0	0		0	0	0
PE-38:3;0(16:0;0-22:3;0)	PE	GPL	MEM	PE	38	3	3	0	0	0	0		0	0	0
PE-38:3;0(16:1;0-22:2;0)	PE	GPL	MEM	PE	38	3	3	0	0.135014	0.126449	0.070659		0	0.011584	0
PE-38:3;0(18:0;0-20:3;0)	PE	GPL	MEM	PE	38	3	3	0	0.84446	0.718878	0.725369		0.560328	0.315739	0.455069
PE-38:3;0(18:1;0-20:2;0)	PE	GPL	MEM	PE	38	3	3	0	1.87419	2.10861	1.96144		0.400946	0.221172	0.327378
PE-38:3;0(18:2;0-20:1;0)	PE	GPL	MEM	PE	38	3	3	0	0.137755	0.241264	0.153094		0.058278	0.037698	0.057559
PE-38:4;0(16:0;0-22:4;0)	PE	GPL	MEM	PE	38	4	4	0	0	0.536126	0.374116		0.895852	0.79338	1.02163
PE-38:4;0(16:1;0-22:3;0)	PE	GPL	MEM	PE	38	4	4	0	0	0	0		0	0.222853	0.549507
PE-38:4;0(17:1;0-21:3;0)	PE	GPL	MEM	PE	38	4	4	0	0	0	0		0	0	0
PE-38:4;0(18:0;0-20:4;0)	PE	GPL	MEM	PE	38	4	4	0	5.17953	4.46794	4.63209		15.4213	15.6903	15.882
PE-38:4;0(18:1;0-20:3;0)	PE	GPL	MEM	PE	38	4	4	0	2.95788	2.70367	2.34997		5.06827	4.86023	5.75993
PE-38:4;0(18:2;0-20:2;0)	PE	GPL	MEM	PE	38	4	4	0	0	0.142538	0		0	0	0
PE-38:5;0(16:0;0-22:5;0)	PE	GPL	MEM	PE	38	5	5	0	0	1.66707	0		0	2.85931	0
PE-38:5;0(16:1;0-22:4;0)	PE	GPL	MEM	PE	38	5	5	0	0	0.140529	0.194817		0.681406	0.438977	0.729017
PE-38:5;0(18:0;0-20:5;0)	PE	GPL	MEM	PE	38	5	5	0	0	0.571788	0.760614		1.0874	0.774407	1.48244
PE-38:5;0(18:1;0-20:4;0)	PE	GPL	MEM	PE	38	5	5	0	5.97978	3.63652	4.77971		8.93996	6.1449	9.84853
PE-38:5;0(18:2;0-20:3;0)	PE	GPL	MEM	PE	38	5	5	0	0	0	0		0	0	0
PE-38:6;0(16:0;0-22:6;0)	PE	GPL	MEM	PE	38	6	6	0	0	0	0		0	0	0
PE-38:6;0(16:1;0-22:5;0)	PE	GPL	MEM	PE	38	6	6	0	0	0	0		0	0	0
PE-38:6;0(18:1;0-20:5;0)	PE	GPL	MEM	PE	38	6	6	0	0	0	0		0	0	0
PE-38:6;0(18:2;0-20:4;0)	PE	GPL	MEM	PE	38	6	6	0	0	0	0		0	0	0
PE-38:7;0(16:1;0-22:6;0)	PE	GPL	MEM	PE	38	7	7	0	0	0	0		0	0	0
PE-38:7;0(16:2;0-22:5;0)	PE	GPL	MEM	PE	38	7	7	0	0	0	0		0	0	0
PE-38:7;0(18:3;0-20:4;0)	PE	GPL	MEM	PE	38	7	7	0	0	0	0		0	0	0
PE-39:3;0(17:0;0-22:3;0)	PE	GPL	MEM	PE	39	3	3	0	0	0	0		0	0	0
PE-39:3;0(17:1;0-22:2;0)	PE	GPL	MEM	PE	39	3	3	0	0	0	0		0	0	0
PE-39:3;0(18:0;0-21:3;0)	PE	GPL	MEM	PE	39	3	3	0	0	0	0		0	0	0
PE-39:3;0(18:1;0-21:2;0)	PE	GPL	MEM	PE	39	3	3	0	0	0	0		0	0	0
PE-39:3;0(19:0;0-20:3;0)	PE	GPL	MEM	PE	39	3	3	0	0	0	0		0	0	0
PE-39:4;0(15:0;0-24:4;0)	PE	GPL	MEM	PE	39	4	4	0	0	0	0		0	0	0
PE-39:4;0(17:0;0-22:4;0)	PE	GPL	MEM	PE	39	4	4	0	0	0	0		0	0.12936	0
PE-39:4;0(17:1;0-22:3;0)	PE	GPL	MEM	PE	39	4	4	0	0	0	0		0	0.182195	0
PE-39:4;0(18:1;0-21:3;0)	PE	GPL	MEM	PE	39	4	4	0	0	0	0		0	0	0
PE-39:4;0(19:0;0-20:4;0)	PE	GPL	MEM	PE	39	4	4	0	0	0	0		0	0.038293	0
PE-39:5;0(15:0;0-24:5;0)	PE	GPL	MEM	PE	39	5	5	0	0	0	0		0	0	0
PE-39:5;0(15:1;0-24:4;0)	PE	GPL	MEM	PE	39	5	5	0	0	0	0		0	0	0
PE-39:6;0(15:0;0-24:6;0)	PE	GPL	MEM	PE	39	6	6	0	0	0	0		0	0	0
PE-39:6;0(17:0;0-22:6;0)	PE	GPL	MEM	PE	39	6	6	0	0	0	0		0	0	0
PE-39:6;0(19:2;0-20:4;0)	PE	GPL	MEM	PE	39	6	6	0	0	0	0		0	0	0
PE-39:7;0(15:1;0-24:6;0)	PE	GPL	MEM	PE	39	7	7	0	0	0	0		0	0	0
PE-40:1;0(16:1;0-24:0;0)	PE	GPL	MEM	PE	40	1	1	0	0	0	0		0	0	0.113178
PE-40:1;0(18:0;0-22:1;0)	PE	GPL	MEM	PE	40	1	1	0	0.034368	0.079633	0		0.09374	0.098664	0.072291
PE-40:1;0(18:1;0-22:0;0)	PE	GPL	MEM	PE	40	1	1	0	0.535867	0.574045	0.44305		0.612634	0.647223	0.661554
PE-40:2;0(16:1;0-24:1;0)	PE	GPL	MEM	PE	40	2	2	0	0	0	0		0	0	0
PE-40:2;0(18:0;0-22:2;0)	PE	GPL	MEM	PE	40	2	2	0	0	0	0		0.092031	0	0
PE-40:2;0(18:1;0-22:1;0)	PE	GPL	MEM	PE	40	2	2	0	1.17645	1.12165	0.905563		0.967547	0.860814	1.05143
PE-40:2;0(20:1;0-20:1;0)	PE	GPL	MEM	PE	40	2	2	0	0.045885	0.084154	0.037643		0.049915	0.029862	0.04762
PE-40:3;0(17:1;0-23:2;0)	PE	GPL	MEM	PE	40	3	3	0	0	0	0		0	0	0
PE-40:3;0(18:0;0-22:3;0)	PE	GPL	MEM	PE	40	3	3	0	0	0	0		0	0	0
PE-40:3;0(18:1;0-22:2;0)	PE	GPL	MEM	PE	40	3	3	0	0.397037	0.524424	0.425305		0	0	0
PE-40:3;0(20:2;0-20:1;0)	PE	GPL	MEM	PE	40	3	3	0	0.022472	0.057337	0		0	0	0
PE-40:4;0(16:0;0-24:4;0)	PE	GPL	MEM	PE	40	4	4	0	0	0	0		0	0	0
PE-40:4;0(16:1;0-24:3;0)	PE	GPL	MEM	PE	40	4	4	0	0	0	0		0	0	0
PE-40:4;0(17:1;0-23:3;0)	PE	GPL	MEM	PE	40	4	4	0	0	0	0		0	0	0
PE-40:4;0(18:0;0-22:4;0)	PE	GPL	MEM	PE	40	4	4	0	0.247263	0.230463	0.237816		1.00647	0.820866	0.245284
PE-40:4;0(18:1;0-22:3;0)	PE	GPL	MEM	PE	40	4	4	0	0	0	0		0	0	0.899544
PE-40:4;0(20:2;0-20:2;0)	PE	GPL	MEM	PE	40	4	4	0	0	0.046534	0		0	0	0
PE-40:4;0(20:3;0-20:1;0)	PE	GPL	MEM	PE	40	4	4	0	0.169015	0.127063	0.100955		0	0	0
PE-40:4;0(20:4;0-20:0;0)	PE	GPL	MEM	PE	40	4	4	0	0	0	0.138624		0.235562	0.295967	0.041273
PE-40:5;0(16:1;0-24:4;0)	PE	GPL	MEM	PE	40	5	5	0	0	0	0		0	0	0
PE-40:5;0(18:0;0-22:5;0)	PE	GPL	MEM	PE	40	5	5	0	0	0	0		0.247298	0.385366	0.283279
PE-40:5;0(18:1;0-22:4;0)	PE	GPL	MEM	PE	40	5	5	0	0.506593	0.471614	0		0.402433	0.465232	0.538828
PE-40:5;0(20:3;0-20:2;0)	PE	GPL	MEM	PE	40	5	5	0	0	0	0		0	0	0
PE-40:5;0(20:4;0-20:1;0)	PE	GPL	MEM	PE	40	5	5	0	0.170025	0.192579	0.608527		0.203906	0.132572	0.205174
PE-40:6;0(18:0;0-22:6;0)	PE	GPL	MEM	PE	40	6	6	0	0	0	0		0	0.826863	0
PE-40:6;0(18:1;0-22:5;0)	PE	GPL	MEM	PE	40	6	6	0	0	0	0		0	0.686188	0.607937
PE-40:6;0(18:2;0-22:4;0)	PE	GPL	MEM	PE	40	6	6	0	0	0	0		0	0	0
PE-40:6;0(20:3;0-20:3;0)	PE	GPL	MEM	PE	40	6	6	0	0	0	0		0	0	0
PE-40:6;0(20:4;0-20:2;0)	PE	GPL	MEM	PE	40	6	6	0	0	0	0		0	0.014716	0
PE-40:7;0(16:1;0-24:6;0)	PE	GPL	MEM	PE	40	7	7	0	0	0	0		0	0	0
PE-40:7;0(18:1;0-22:6;0)	PE	GPL	MEM	PE	40	7	7	0	0	0	0		0	0	0
PE-40:7;0(18:2;0-22:5;0)	PE	GPL	MEM	PE	40	7	7	0	0	0	0		0	0	0
PE-40:7;0(20:4;0-20:3;0)	PE	GPL	MEM	PE	40	7	7	0	0	0	0		0	0	0
PE-40:8;0(18:2;0-22:6;0)	PE	GPL	MEM	PE	40	8	8	0	0	0	0		0	0	0
PE-40:8;0(20:4;0-20:4;0)	PE	GPL	MEM	PE	40	8	8	0	0	0	0		0	0	0
PE-41:4;0(17:0;0-24:4;0)	PE	GPL	MEM	PE	41	4	4	0	0	0	0		0	0	0
PE-41:6;0(17:0;0-24:6;0)	PE	GPL	MEM	PE	41	6	6	0	0	0	0		0	0	0
PE-41:6;0(19:1;0-22:5;0)	PE	GPL	MEM	PE	41	6	6	0	0	0	0		0	0	0
PE-41:7;0(17:2;0-24:5;0)	PE	GPL	MEM	PE	41	7	7	0	0	0	0		0	0	0
PE-41:7;0(19:1;0-22:6;0)	PE	GPL	MEM	PE	41	7	7	0	0	0	0		0	0	0
PE-42:1;0(18:1;0-24:0;0)	PE	GPL	MEM	PE	42	1	1	0	1.25136	1.24261	1.23144		1.83528	1.81648	1.75443
PE-42:2;0(18:1;0-24:1;0)	PE	GPL	MEM	PE	42	2	2	0	0.602189	0.680003	0.527616		0.578119	0	0.420743
PE-42:2;0(18:2;0-24:0;0)	PE	GPL	MEM	PE	42	2	2	0	0	0	0		0	0	0
PE-42:2;0(21:1;0-21:1;0)	PE	GPL	MEM	PE	42	2	2	0	0	0	0		0	0	0
PE-42:4;0(18:0;0-24:4;0)	PE	GPL	MEM	PE	42	4	4	0	0	0	0		0	0	0
PE-42:4;0(20:0;0-22:4;0)	PE	GPL	MEM	PE	42	4	4	0	0	0	0		0	0	0
PE-42:4;0(20:4;0-22:0;0)	PE	GPL	MEM	PE	42	4	4	0	0	0	0		0	0	0
PE-42:5;0(18:0;0-24:5;0)	PE	GPL	MEM	PE	42	5	5	0	0	0	0		0	0	0
PE-42:5;0(18:1;0-24:4;0)	PE	GPL	MEM	PE	42	5	5	0	0	0	0		0	0	0
PE-42:5;0(20:1;0-22:4;0)	PE	GPL	MEM	PE	42	5	5	0	0	0	0		0	0	0
PE-42:6;0(20:2;0-22:4;0)	PE	GPL	MEM	PE	42	6	6	0	0	0	0		0	0	0
PE-42:7;0(18:1;0-24:6;0)	PE	GPL	MEM	PE	42	7	7	0	0	0	0		0	0	0
PE-42:7;0(20:2;0-22:5;0)	PE	GPL	MEM	PE	42	7	7	0	0	0	0		0	0	0
PE-42:7;0(20:3;0-22:4;0)	PE	GPL	MEM	PE	42	7	7	0	0	0	0		0	0	0
PE-42:8;0(20:3;0-22:5;0)	PE	GPL	MEM	PE	42	8	8	0	0	0	0		0	0	0
PE-42:8;0(20:4;0-22:4;0)	PE	GPL	MEM	PE	42	8	8	0	0	0	0		0	0	0
PE-42:9;0(20:4;0-22:5;0)	PE	GPL	MEM	PE	42	9	9	0	0	0	0		0	0	0
PE-44:12;0(22:6;0-22:6;0)	PE	GPL	MEM	PE	44	12	12	0	0	0	0		0	0	0
PE-44:4;0(20:4;0-24:0;0)	PE	GPL	MEM	PE	44	4	4	0	0	0	0		0	0	0.478201
PE-44:5;0(20:4;0-24:1;0)	PE	GPL	MEM	PE	44	5	5	0	0	0	0		0	0	0
PE-44:8;0(20:4;0-24:4;0)	PE	GPL	MEM	PE	44	8	8	0	0	0	0		0	0	0
PE-44:8;0(22:4;0-22:4;0)	PE	GPL	MEM	PE	44	8	8	0	0	0	0		0	0	0
PE-46:8;0(22:4;0-24:4;0)	PE	GPL	MEM	PE	46	8	8	0	0	0	0		0	0	0
PE-46:8;0(22:5;0-24:3;0)	PE	GPL	MEM	PE	46	8	8	0	0	0	0		0	0	0
PE O--31:4;0(16:1;0-15:3;0)	PE O-	GPL	MEM	PE O-	31	4	3	0	0	0	0		0	0	0
PE O--32:0;0(16:0;0-16:0;0)	PE O-	GPL	MEM	PE O-	32	0	0	0	0	0	0		0	0	0
PE O--32:0;0(17:0;0-15:0;0)	PE O-	GPL	MEM	PE O-	32	0	0	0	0	0	0		0	0	0
PE O--32:0;0(18:0;0-14:0;0)	PE O-	GPL	MEM	PE O-	32	0	0	0	0	0	0		0	0	0
PE O--32:1;0(16:0;0-16:1;0)	PE O-	GPL	MEM	PE O-	32	1	0	0	0.108765	0.127133	0.161598		0	0	0
PE O--32:1;0(16:1;0-16:0;0)	PE O-	GPL	MEM	PE O-	32	1	0	0	0.109336	0.104639	0.179016		0	0	0
PE O--32:1;0(17:0;0-15:1;0)	PE O-	GPL	MEM	PE O-	32	1	0	0	0	0	0		0	0	0
PE O--32:1;0(17:1;0-15:0;0)	PE O-	GPL	MEM	PE O-	32	1	0	0	0	0	0		0	0	0
PE O--32:1;0(18:1;0-14:0;0)	PE O-	GPL	MEM	PE O-	32	1	0	0	0.075365	0.080755	0.064221		0	0	0
PE O--32:2;0(16:1;0-16:1;0)	PE O-	GPL	MEM	PE O-	32	2	1	0	0.812875	0.912762	0.675723		0.69413	0.407154	0.599256
PE O--32:2;0(16:2;0-16:0;0)	PE O-	GPL	MEM	PE O-	32	2	1	0	0	0.046186	0.052943		0.035052	0.095996	0.030012
PE O--32:2;0(18:1;0-14:1;0)	PE O-	GPL	MEM	PE O-	32	2	1	0	0	0	0		0	0	0
PE O--32:2;0(18:2;0-14:0;0)	PE O-	GPL	MEM	PE O-	32	2	1	0	0.107436	0.067252	0.048249		0.040669	0.047485	0.057507
PE O--32:3;0(18:2;0-14:1;0)	PE O-	GPL	MEM	PE O-	32	3	2	0	0	0	0		0	0	0
PE O--33:1;0(16:0;0-17:1;0)	PE O-	GPL	MEM	PE O-	33	1	0	0	0	0	0		0	0	0
PE O--33:1;0(16:1;0-17:0;0)	PE O-	GPL	MEM	PE O-	33	1	0	0	0	0	0		0	0	0
PE O--33:1;0(17:0;0-16:1;0)	PE O-	GPL	MEM	PE O-	33	1	0	0	0	0	0		0	0	0
PE O--33:1;0(17:1;0-16:0;0)	PE O-	GPL	MEM	PE O-	33	1	0	0	0	0	0		0	0	0
PE O--33:1;0(18:1;0-15:0;0)	PE O-	GPL	MEM	PE O-	33	1	0	0	0	0	0		0	0	0
PE O--33:2;0(16:1;0-17:1;0)	PE O-	GPL	MEM	PE O-	33	2	1	0	0.104612	0.162728	0.122712		0	0	0
PE O--33:2;0(17:0;0-16:2;0)	PE O-	GPL	MEM	PE O-	33	2	1	0	0	0	0		0	0	0
PE O--33:2;0(17:1;0-16:1;0)	PE O-	GPL	MEM	PE O-	33	2	1	0	0.188415	0.335447	0.221591		0	0	0
PE O--33:2;0(17:2;0-16:0;0)	PE O-	GPL	MEM	PE O-	33	2	1	0	0.027528	0.109617	0.069333		0	0	0
PE O--33:2;0(18:2;0-15:0;0)	PE O-	GPL	MEM	PE O-	33	2	1	0	0	0.027026	0.025707		0	0	0
PE O--34:0;0(16:0;0-18:0;0)	PE O-	GPL	MEM	PE O-	34	0	0	0	0	0	0		0	0	0
PE O--34:0;0(17:0;0-17:0;0)	PE O-	GPL	MEM	PE O-	34	0	0	0	0	0	0		0	0	0
PE O--34:0;0(18:0;0-16:0;0)	PE O-	GPL	MEM	PE O-	34	0	0	0	0	0	0		0	0	0
PE O--34:1;0(16:0;0-18:1;0)	PE O-	GPL	MEM	PE O-	34	1	0	0	1.2733	1.60895	1.23698		0.177149	0	0
PE O--34:1;0(16:1;0-18:0;0)	PE O-	GPL	MEM	PE O-	34	1	0	0	0	0	0		0	0	0
PE O--34:1;0(17:0;0-17:1;0)	PE O-	GPL	MEM	PE O-	34	1	0	0	0.133417	0.141126	0.10873		0.040763	0	0
PE O--34:1;0(17:1;0-17:0;0)	PE O-	GPL	MEM	PE O-	34	1	0	0	0.032622	0.038377	0.022866		0.004906	0	0
PE O--34:1;0(18:0;0-16:1;0)	PE O-	GPL	MEM	PE O-	34	1	0	0	0.302331	0.354498	0.294061		0.043841	0	0
PE O--34:1;0(18:1;0-16:0;0)	PE O-	GPL	MEM	PE O-	34	1	0	0	1.13718	1.30601	1.00477		0.138693	0	0
PE O--34:2;0(16:0;0-18:2;0)	PE O-	GPL	MEM	PE O-	34	2	1	0	0.133722	0.143727	0.073267		0	0.045407	0.063613
PE O--34:2;0(16:1;0-18:1;0)	PE O-	GPL	MEM	PE O-	34	2	1	0	13.1094	13.8106	11.6592		8.33682	6.98446	9.04376
PE O--34:2;0(16:2;0-18:0;0)	PE O-	GPL	MEM	PE O-	34	2	1	0	0.044597	0.049565	0.07773		0	0.043377	0
PE O--34:2;0(17:0;0-17:2;0)	PE O-	GPL	MEM	PE O-	34	2	1	0	0	0	0		0	0	0
PE O--34:2;0(17:1;0-17:1;0)	PE O-	GPL	MEM	PE O-	34	2	1	0	0.129127	0.136279	0.079925		0.067795	0.051703	0.043403
PE O--34:2;0(17:2;0-17:0;0)	PE O-	GPL	MEM	PE O-	34	2	1	0	0	0	0		0	0	0
PE O--34:2;0(18:1;0-16:1;0)	PE O-	GPL	MEM	PE O-	34	2	1	0	3.12112	3.357	3.07172		1.74591	1.54763	1.97069
PE O--34:2;0(18:2;0-16:0;0)	PE O-	GPL	MEM	PE O-	34	2	1	0	2.0987	2.0202	1.85423		1.61886	1.57165	1.95008
PE O--34:3;0(16:1;0-18:2;0)	PE O-	GPL	MEM	PE O-	34	3	2	0	0.670226	0.813639	0.67933		0.717887	0.601805	0.741475
PE O--34:3;0(16:2;0-18:1;0)	PE O-	GPL	MEM	PE O-	34	3	2	0	0.280233	0.274244	0.257381		0.208329	0.157273	0.107655
PE O--34:3;0(17:2;0-17:1;0)	PE O-	GPL	MEM	PE O-	34	3	2	0	0.043231	0.06849	0		0	0	0.054416
PE O--34:3;0(18:1;0-16:2;0)	PE O-	GPL	MEM	PE O-	34	3	2	0	0	0.036478	0		0	0	0
PE O--34:3;0(18:2;0-16:1;0)	PE O-	GPL	MEM	PE O-	34	3	2	0	2.29735	2.43043	2.17193		1.45325	1.42275	1.78181
PE O--34:4;0(16:1;0-18:3;0)	PE O-	GPL	MEM	PE O-	34	4	3	0	0	0	0		0	0	0
PE O--34:4;0(16:2;0-18:2;0)	PE O-	GPL	MEM	PE O-	34	4	3	0	0	0	0		0	0	0
PE O--34:4;0(18:2;0-16:2;0)	PE O-	GPL	MEM	PE O-	34	4	3	0	0	0	0		0	0	0
PE O--35:1;0(16:0;0-19:1;0)	PE O-	GPL	MEM	PE O-	35	1	0	0	0.001626	0	0		0	0	0
PE O--35:1;0(17:0;0-18:1;0)	PE O-	GPL	MEM	PE O-	35	1	0	0	0.447652	0.333609	0.395702		0	0	0
PE O--35:1;0(17:1;0-18:0;0)	PE O-	GPL	MEM	PE O-	35	1	0	0	0.043785	0.031196	0.039629		0	0	0
PE O--35:1;0(18:0;0-17:1;0)	PE O-	GPL	MEM	PE O-	35	1	0	0	0.00686	0.008536	0.006729		0	0	0
PE O--35:1;0(18:1;0-17:0;0)	PE O-	GPL	MEM	PE O-	35	1	0	0	0.015962	0.011151	0.013656		0	0	0
PE O--35:2;0(16:1;0-19:1;0)	PE O-	GPL	MEM	PE O-	35	2	1	0	0.064023	0.054756	0.042858		0.019717	0	0.033442
PE O--35:2;0(17:0;0-18:2;0)	PE O-	GPL	MEM	PE O-	35	2	1	0	0.187734	0.230928	0.127753		0.220309	0.263787	0.317095
PE O--35:2;0(17:1;0-18:1;0)	PE O-	GPL	MEM	PE O-	35	2	1	0	2.60434	2.93704	2.27748		1.39454	1.4691	1.76825
PE O--35:2;0(17:2;0-18:0;0)	PE O-	GPL	MEM	PE O-	35	2	1	0	0	0	0		0	0.023378	0.023814
PE O--35:2;0(18:1;0-17:1;0)	PE O-	GPL	MEM	PE O-	35	2	1	0	0.26023	0.310371	0.223404		0.117447	0.108541	0.214893
PE O--35:2;0(18:2;0-17:0;0)	PE O-	GPL	MEM	PE O-	35	2	1	0	0.112175	0.157722	0.173325		0.100898	0.070617	0.13707
PE O--35:3;0(16:1;0-19:2;0)	PE O-	GPL	MEM	PE O-	35	3	2	0	0	0.013581	0		0	0	0
PE O--35:3;0(17:0;0-18:3;0)	PE O-	GPL	MEM	PE O-	35	3	2	0	0	0	0		0	0	0
PE O--35:3;0(17:1;0-18:2;0)	PE O-	GPL	MEM	PE O-	35	3	2	0	0.285049	0.302654	0.264176		0.190322	0.212955	0.263516
PE O--35:3;0(17:2;0-18:1;0)	PE O-	GPL	MEM	PE O-	35	3	2	0	0.556339	0.541513	0.559784		0.265727	0.301257	0.278664
PE O--35:3;0(18:2;0-17:1;0)	PE O-	GPL	MEM	PE O-	35	3	2	0	0.237949	0.295253	0.22876		0.150324	0.18774	0.241183
PE O--35:4;0(16:1;0-19:3;0)	PE O-	GPL	MEM	PE O-	35	4	3	0	0	0	0		0	0	0
PE O--35:4;0(17:1;0-18:3;0)	PE O-	GPL	MEM	PE O-	35	4	3	0	0	0	0		0	0	0
PE O--35:4;0(17:2;0-18:2;0)	PE O-	GPL	MEM	PE O-	35	4	3	0	0	0	0		0	0	0
PE O--36:1;0(16:0;0-20:1;0)	PE O-	GPL	MEM	PE O-	36	1	0	0	0.490403	0.660177	0.595908		0	0	0
PE O--36:1;0(16:1;0-20:0;0)	PE O-	GPL	MEM	PE O-	36	1	0	0	0	0	0		0	0	0
PE O--36:1;0(17:0;0-19:1;0)	PE O-	GPL	MEM	PE O-	36	1	0	0	0	0	0		0	0	0
PE O--36:1;0(18:0;0-18:1;0)	PE O-	GPL	MEM	PE O-	36	1	0	0	1.49798	2.14659	1.98091		0	0	0
PE O--36:1;0(18:1;0-18:0;0)	PE O-	GPL	MEM	PE O-	36	1	0	0	0	0	0		0	0	0
PE O--36:2;0(16:0;0-20:2;0)	PE O-	GPL	MEM	PE O-	36	2	1	0	0.673926	0.912832	0.660261		0.274755	0.239652	0.361265
PE O--36:2;0(16:1;0-20:1;0)	PE O-	GPL	MEM	PE O-	36	2	1	0	4.36829	4.4631	3.84062		3.75424	3.53719	4.71107
PE O--36:2;0(17:0;0-19:2;0)	PE O-	GPL	MEM	PE O-	36	2	1	0	0	0	0		0	0	0
PE O--36:2;0(17:1;0-19:1;0)	PE O-	GPL	MEM	PE O-	36	2	1	0	0.055635	0.040877	0		0	0	0
PE O--36:2;0(18:0;0-18:2;0)	PE O-	GPL	MEM	PE O-	36	2	1	0	0.414025	0.522055	0.435057		0.26331	0.281767	0.325522
PE O--36:2;0(18:1;0-18:1;0)	PE O-	GPL	MEM	PE O-	36	2	1	0	34.0068	36.7046	29.9774		21.9262	20.1975	25.5727
PE O--36:2;0(18:2;0-18:0;0)	PE O-	GPL	MEM	PE O-	36	2	1	0	0	0	0		0	0	0
PE O--36:3;0(16:0;0-20:3;0)	PE O-	GPL	MEM	PE O-	36	3	2	0	0.306627	0.326675	0.233144		0.225381	0.239603	0.258737
PE O--36:3;0(16:1;0-20:2;0)	PE O-	GPL	MEM	PE O-	36	3	2	0	2.21969	2.37233	1.99655		1.40042	1.12665	1.60969
PE O--36:3;0(16:2;0-20:1;0)	PE O-	GPL	MEM	PE O-	36	3	2	0	0.042215	0.053758	0		0	0	0.058797
PE O--36:3;0(17:1;0-19:2;0)	PE O-	GPL	MEM	PE O-	36	3	2	0	0	0	0		0	0	0
PE O--36:3;0(17:2;0-19:1;0)	PE O-	GPL	MEM	PE O-	36	3	2	0	0	0	0		0	0	0
PE O--36:3;0(18:0;0-18:3;0)	PE O-	GPL	MEM	PE O-	36	3	2	0	0	0	0		0	0	0
PE O--36:3;0(18:1;0-18:2;0)	PE O-	GPL	MEM	PE O-	36	3	2	0	3.0179	3.38297	2.9193		2.13946	1.92519	2.49948
PE O--36:3;0(18:2;0-18:1;0)	PE O-	GPL	MEM	PE O-	36	3	2	0	36.0229	38.8713	31.5024		18.486	16.6706	21.1461
PE O--36:4;0(16:0;0-20:4;0)	PE O-	GPL	MEM	PE O-	36	4	3	0	0.770703	0.952728	0.783246		0.364953	0.265654	0.338038
PE O--36:4;0(16:1;0-20:3;0)	PE O-	GPL	MEM	PE O-	36	4	3	0	2.06225	2.10268	1.72658		1.69611	1.22643	1.97408
PE O--36:4;0(16:2;0-20:2;0)	PE O-	GPL	MEM	PE O-	36	4	3	0	0	0	0		0	0	0
PE O--36:4;0(18:1;0-18:3;0)	PE O-	GPL	MEM	PE O-	36	4	3	0	0.0804	0	0.085874		0.090192	0.036748	0.067949
PE O--36:4;0(18:2;0-18:2;0)	PE O-	GPL	MEM	PE O-	36	4	3	0	2.06469	2.0477	1.67994		0.652309	0.597179	0.790027
PE O--36:5;0(16:0;0-20:5;0)	PE O-	GPL	MEM	PE O-	36	5	4	0	0	0.198609	0.127299		0	0	0.287163
PE O--36:5;0(16:1;0-20:4;0)	PE O-	GPL	MEM	PE O-	36	5	4	0	8.50325	8.39841	7.36109		27.227	23.8472	29.5199
PE O--36:5;0(16:2;0-20:3;0)	PE O-	GPL	MEM	PE O-	36	5	4	0	0	0	0		0	0	0
PE O--36:5;0(18:2;0-18:3;0)	PE O-	GPL	MEM	PE O-	36	5	4	0	0	0.204532	0		0	0	0
PE O--36:6;0(16:1;0-20:5;0)	PE O-	GPL	MEM	PE O-	36	6	5	0	1.60828	1.65892	1.35136		3.55569	3.51138	4.54439
PE O--36:6;0(16:2;0-20:4;0)	PE O-	GPL	MEM	PE O-	36	6	5	0	0	0	0		0.545124	0	0
PE O--37:1;0(16:0;0-21:1;0)	PE O-	GPL	MEM	PE O-	37	1	0	0	0.027204	0.032029	0		0	0	0
PE O--37:1;0(17:0;0-20:1;0)	PE O-	GPL	MEM	PE O-	37	1	0	0	0.318696	0.466892	0.410739		0	0	0
PE O--37:1;0(17:1;0-20:0;0)	PE O-	GPL	MEM	PE O-	37	1	0	0	0	0	0		0	0	0
PE O--37:1;0(18:0;0-19:1;0)	PE O-	GPL	MEM	PE O-	37	1	0	0	0.050252	0.059667	0.053723		0	0	0
PE O--37:2;0(16:1;0-21:1;0)	PE O-	GPL	MEM	PE O-	37	2	1	0	0.056012	0	0		0	0	0.062543
PE O--37:2;0(17:0;0-20:2;0)	PE O-	GPL	MEM	PE O-	37	2	1	0	0.483342	0.476688	0.357994		0.258583	0.181661	0.234716
PE O--37:2;0(17:1;0-20:1;0)	PE O-	GPL	MEM	PE O-	37	2	1	0	1.02004	0.987941	0.882062		0.649619	0.658929	0.710361
PE O--37:2;0(17:2;0-20:0;0)	PE O-	GPL	MEM	PE O-	37	2	1	0	0	0	0		0	0	0
PE O--37:2;0(18:1;0-19:1;0)	PE O-	GPL	MEM	PE O-	37	2	1	0	0.337881	0.429398	0.335179		0.27584	0.181588	0.272608
PE O--37:3;0(16:0;0-21:3;0)	PE O-	GPL	MEM	PE O-	37	3	2	0	0	0	0		0	0	0
PE O--37:3;0(16:1;0-21:2;0)	PE O-	GPL	MEM	PE O-	37	3	2	0	0	0	0		0	0	0
PE O--37:3;0(17:0;0-20:3;0)	PE O-	GPL	MEM	PE O-	37	3	2	0	0.350543	0.349654	0.256581		0.501304	0.539598	0.426505
PE O--37:3;0(17:1;0-20:2;0)	PE O-	GPL	MEM	PE O-	37	3	2	0	0.486814	0.581327	0.494693		0.22857	0.232938	0.282831
PE O--37:3;0(17:2;0-20:1;0)	PE O-	GPL	MEM	PE O-	37	3	2	0	0.055156	0.076105	0.06957		0.042563	0	0.03999
PE O--37:3;0(18:1;0-19:2;0)	PE O-	GPL	MEM	PE O-	37	3	2	0	0.154093	0.177082	0.180797		0	0.043185	0.060645
PE O--37:3;0(18:2;0-19:1;0)	PE O-	GPL	MEM	PE O-	37	3	2	0	0.233497	0.249716	0.261241		0.15919	0.154717	0.159818
PE O--37:4;0(16:1;0-21:3;0)	PE O-	GPL	MEM	PE O-	37	4	3	0	0	0	0		0.013048	0	0.01272
PE O--37:4;0(17:0;0-20:4;0)	PE O-	GPL	MEM	PE O-	37	4	3	0	0.311709	0.351513	0.281139		0.194762	0.267036	0.231238
PE O--37:4;0(17:1;0-20:3;0)	PE O-	GPL	MEM	PE O-	37	4	3	0	0.310646	0.353817	0.200101		0.170296	0.178157	0.195291
PE O--37:4;0(17:2;0-20:2;0)	PE O-	GPL	MEM	PE O-	37	4	3	0	0	0	0		0	0	0
PE O--37:4;0(18:1;0-19:3;0)	PE O-	GPL	MEM	PE O-	37	4	3	0	0.028544	0	0		0	0.015016	0
PE O--37:4;0(18:2;0-19:2;0)	PE O-	GPL	MEM	PE O-	37	4	3	0	0.05761	0.062574	0.102797		0	0.018654	0.011769
PE O--37:5;0(17:0;0-20:5;0)	PE O-	GPL	MEM	PE O-	37	5	4	0	0.116956	0	0		0	0	0
PE O--37:5;0(17:1;0-20:4;0)	PE O-	GPL	MEM	PE O-	37	5	4	0	1.50723	1.74592	1.32635		3.79786	3.54337	4.18381
PE O--37:5;0(17:2;0-20:3;0)	PE O-	GPL	MEM	PE O-	37	5	4	0	0	0	0		0	0	0
PE O--37:5;0(18:2;0-19:3;0)	PE O-	GPL	MEM	PE O-	37	5	4	0	0	0	0		0	0	0
PE O--37:6;0(17:1;0-20:5;0)	PE O-	GPL	MEM	PE O-	37	6	5	0	0	0	0		0	0	0
PE O--37:6;0(17:2;0-20:4;0)	PE O-	GPL	MEM	PE O-	37	6	5	0	0	0	0		1.03253	0	1.08008
PE O--38:1;0(16:0;0-22:1;0)	PE O-	GPL	MEM	PE O-	38	1	0	0	0.255417	0.291901	0.215383		0.079841	0.082665	0.094609
PE O--38:1;0(18:0;0-20:1;0)	PE O-	GPL	MEM	PE O-	38	1	0	0	2.22939	2.48917	2.03702		0.969409	0.776537	0.747536
PE O--38:1;0(18:1;0-20:0;0)	PE O-	GPL	MEM	PE O-	38	1	0	0	0	0	0		0	0	0
PE O--38:2;0(16:0;0-22:2;0)	PE O-	GPL	MEM	PE O-	38	2	1	0	0.178101	0.182896	0.171241		0.119371	0	0
PE O--38:2;0(16:1;0-22:1;0)	PE O-	GPL	MEM	PE O-	38	2	1	0	0.40598	0.363622	0.324493		0.499643	0.472203	0.78656
PE O--38:2;0(18:0;0-20:2;0)	PE O-	GPL	MEM	PE O-	38	2	1	0	1.05467	1.35429	0.961111		0.577036	0.502523	0.667008
PE O--38:2;0(18:1;0-20:1;0)	PE O-	GPL	MEM	PE O-	38	2	1	0	7.75993	8.77697	6.85008		7.40708	6.63913	8.64916
PE O--38:2;0(18:2;0-20:0;0)	PE O-	GPL	MEM	PE O-	38	2	1	0	0	0	0.21501		0.312469	0.247005	0.304298
PE O--38:3;0(16:0;0-22:3;0)	PE O-	GPL	MEM	PE O-	38	3	2	0	0	0.068131	0.030604		0	0	0.041711
PE O--38:3;0(16:1;0-22:2;0)	PE O-	GPL	MEM	PE O-	38	3	2	0	0.396781	0.444958	0.34928		0.291417	0.258315	0.450074
PE O--38:3;0(17:0;0-21:3;0)	PE O-	GPL	MEM	PE O-	38	3	2	0	0	0	0		0	0	0
PE O--38:3;0(18:0;0-20:3;0)	PE O-	GPL	MEM	PE O-	38	3	2	0	0.541228	0.58721	0.487571		0.603267	0.497376	0.678416
PE O--38:3;0(18:1;0-20:2;0)	PE O-	GPL	MEM	PE O-	38	3	2	0	4.50178	4.943	3.86505		3.31087	2.99539	3.73976
PE O--38:3;0(18:2;0-20:1;0)	PE O-	GPL	MEM	PE O-	38	3	2	0	5.52847	5.7427	4.44166		4.71093	4.22313	4.86445
PE O--38:4;0(16:0;0-22:4;0)	PE O-	GPL	MEM	PE O-	38	4	3	0	0.296511	0.303653	0.203565		0.110845	0.094778	0.144236
PE O--38:4;0(16:1;0-22:3;0)	PE O-	GPL	MEM	PE O-	38	4	3	0	0.096082	0.194059	0.08317		0.101643	0.087053	0.119203
PE O--38:4;0(18:0;0-20:4;0)	PE O-	GPL	MEM	PE O-	38	4	3	0	1.9793	2.2629	1.94494		0.413024	0.346392	0.495656
PE O--38:4;0(18:1;0-20:3;0)	PE O-	GPL	MEM	PE O-	38	4	3	0	5.2606	5.39555	4.78477		1.9241	1.54723	2.34894
PE O--38:4;0(18:2;0-20:2;0)	PE O-	GPL	MEM	PE O-	38	4	3	0	3.78278	4.06789	3.7837		0.485078	0.422835	0.655293
PE O--38:5;0(16:0;0-22:5;0)	PE O-	GPL	MEM	PE O-	38	5	4	0	0.123912	0.155196	0.079715		0.818308	0.643091	0.776779
PE O--38:5;0(16:1;0-22:4;0)	PE O-	GPL	MEM	PE O-	38	5	4	0	1.08881	1.04074	0.654497		8.29949	7.39446	8.99549
PE O--38:5;0(16:2;0-22:3;0)	PE O-	GPL	MEM	PE O-	38	5	4	0	0	0	0		0	0	0
PE O--38:5;0(18:0;0-20:5;0)	PE O-	GPL	MEM	PE O-	38	5	4	0	0.330614	0.522351	0.213203		0.663726	0.369534	0.887437
PE O--38:5;0(18:1;0-20:4;0)	PE O-	GPL	MEM	PE O-	38	5	4	0	11.9415	13.5599	7.54585		57.2376	51.7424	64.4498
PE O--38:5;0(18:2;0-20:3;0)	PE O-	GPL	MEM	PE O-	38	5	4	0	4.60932	5.28869	2.94889		11.3687	9.78803	13.0292
PE O--38:6;0(16:0;0-22:6;0)	PE O-	GPL	MEM	PE O-	38	6	5	0	0	0	0		0	0	0
PE O--38:6;0(16:1;0-22:5;0)	PE O-	GPL	MEM	PE O-	38	6	5	0	0.811605	0.727685	0.528642		3.80473	3.94958	5.18862
PE O--38:6;0(16:2;0-22:4;0)	PE O-	GPL	MEM	PE O-	38	6	5	0	0	0	0		0	0	0
PE O--38:6;0(18:1;0-20:5;0)	PE O-	GPL	MEM	PE O-	38	6	5	0	3.11556	2.74459	2.99204		6.00547	4.8699	6.81049
PE O--38:6;0(18:2;0-20:4;0)	PE O-	GPL	MEM	PE O-	38	6	5	0	20.3959	22.4732	18.1597		39.3241	35.204	43.564
PE O--38:7;0(16:1;0-22:6;0)	PE O-	GPL	MEM	PE O-	38	7	6	0	0.445088	0	0.397128		3.35684	3.84026	3.84969
PE O--38:7;0(16:2;0-22:5;0)	PE O-	GPL	MEM	PE O-	38	7	6	0	0	0	0		0	0	0
PE O--38:7;0(18:2;0-20:5;0)	PE O-	GPL	MEM	PE O-	38	7	6	0	4.0618	4.59049	3.66055		7.81706	6.60577	8.498
PE O--39:1;0(17:0;0-22:1;0)	PE O-	GPL	MEM	PE O-	39	1	0	0	0	0	0		0	0	0
PE O--39:1;0(18:0;0-21:1;0)	PE O-	GPL	MEM	PE O-	39	1	0	0	0	0	0		0	0	0
PE O--39:2;0(17:0;0-22:2;0)	PE O-	GPL	MEM	PE O-	39	2	1	0	0	0.062534	0		0	0	0
PE O--39:2;0(17:1;0-22:1;0)	PE O-	GPL	MEM	PE O-	39	2	1	0	0.261088	0.218472	0.236719		0.303212	0	0.22604
PE O--39:2;0(18:0;0-21:2;0)	PE O-	GPL	MEM	PE O-	39	2	1	0	0	0	0		0	0	0
PE O--39:2;0(18:1;0-21:1;0)	PE O-	GPL	MEM	PE O-	39	2	1	0	0.480012	0.420428	0.451331		0.291654	0	0.284639
PE O--39:3;0(16:1;0-23:2;0)	PE O-	GPL	MEM	PE O-	39	3	2	0	0	0	0		0	0	0
PE O--39:3;0(17:0;0-22:3;0)	PE O-	GPL	MEM	PE O-	39	3	2	0	0	0	0		0	0	0
PE O--39:3;0(17:1;0-22:2;0)	PE O-	GPL	MEM	PE O-	39	3	2	0	0.113586	0.153596	0.06726		0	0	0
PE O--39:3;0(18:1;0-21:2;0)	PE O-	GPL	MEM	PE O-	39	3	2	0	0	0	0.085886		0.101454	0	0
PE O--39:3;0(18:2;0-21:1;0)	PE O-	GPL	MEM	PE O-	39	3	2	0	0.336608	0.470809	0.266892		0.244692	0	0.372752
PE O--39:4;0(17:0;0-22:4;0)	PE O-	GPL	MEM	PE O-	39	4	3	0	0	0.254756	0.369074		0.197336	0.217168	0.216096
PE O--39:4;0(17:1;0-22:3;0)	PE O-	GPL	MEM	PE O-	39	4	3	0	0	0	0		0	0.072815	0.058283
PE O--39:4;0(18:1;0-21:3;0)	PE O-	GPL	MEM	PE O-	39	4	3	0	0.500688	0	0		0.379607	0.247904	0.272873
PE O--39:4;0(18:2;0-21:2;0)	PE O-	GPL	MEM	PE O-	39	4	3	0	0	0.249458	0		0	0	0
PE O--39:5;0(17:0;0-22:5;0)	PE O-	GPL	MEM	PE O-	39	5	4	0	0	0.415581	0		0	0.232579	0
PE O--39:5;0(17:1;0-22:4;0)	PE O-	GPL	MEM	PE O-	39	5	4	0	0	0.639909	0.732669		2.43585	2.04551	2.21214
PE O--39:5;0(18:2;0-21:3;0)	PE O-	GPL	MEM	PE O-	39	5	4	0	0	0	0		0	0	0.334113
PE O--39:6;0(17:0;0-22:6;0)	PE O-	GPL	MEM	PE O-	39	6	5	0	0	0	0		0	0	0
PE O--39:6;0(17:1;0-22:5;0)	PE O-	GPL	MEM	PE O-	39	6	5	0	0	0	0		0	0	0
PE O--39:6;0(17:2;0-22:4;0)	PE O-	GPL	MEM	PE O-	39	6	5	0	0	0	0		0	0	0
PE O--39:7;0(17:1;0-22:6;0)	PE O-	GPL	MEM	PE O-	39	7	6	0	0	0	0		0	0	0
PE O--39:7;0(17:2;0-22:5;0)	PE O-	GPL	MEM	PE O-	39	7	6	0	0	0	0		0	0	0
PE O--40:1;0(18:0;0-22:1;0)	PE O-	GPL	MEM	PE O-	40	1	0	0	0.39085	0.632663	0.533599		0	0	0
PE O--40:1;0(18:1;0-22:0;0)	PE O-	GPL	MEM	PE O-	40	1	0	0	0	0	0		0	0	0
PE O--40:2;0(16:1;0-24:1;0)	PE O-	GPL	MEM	PE O-	40	2	1	0	0	0	0		0	0	0
PE O--40:2;0(18:0;0-22:2;0)	PE O-	GPL	MEM	PE O-	40	2	1	0	0.204991	0.264991	0.26642		0.148782	0.054698	0.192034
PE O--40:2;0(18:1;0-22:1;0)	PE O-	GPL	MEM	PE O-	40	2	1	0	2.15723	1.9243	1.64868		2.28439	2.37474	2.73334
PE O--40:2;0(18:2;0-22:0;0)	PE O-	GPL	MEM	PE O-	40	2	1	0	0	0.028914	0		0	0	0
PE O--40:3;0(16:1;0-24:2;0)	PE O-	GPL	MEM	PE O-	40	3	2	0	0	0	0		0	0	0.04128
PE O--40:3;0(18:0;0-22:3;0)	PE O-	GPL	MEM	PE O-	40	3	2	0	0.036711	0.045306	0.043947		0.052322	0.043731	0.059896
PE O--40:3;0(18:1;0-22:2;0)	PE O-	GPL	MEM	PE O-	40	3	2	0	1.10732	1.22784	0.990922		1.07151	0.81661	1.19559
PE O--40:3;0(18:2;0-22:1;0)	PE O-	GPL	MEM	PE O-	40	3	2	0	1.58045	1.61547	1.42394		1.67557	1.43738	1.82365
PE O--40:4;0(16:1;0-24:3;0)	PE O-	GPL	MEM	PE O-	40	4	3	0	0	0	0		0	0	0
PE O--40:4;0(18:0;0-22:4;0)	PE O-	GPL	MEM	PE O-	40	4	3	0	0.263532	0.372792	0.265403		0	0	0
PE O--40:4;0(18:1;0-22:3;0)	PE O-	GPL	MEM	PE O-	40	4	3	0	0.319979	0.404738	0.342857		0	0	0
PE O--40:4;0(18:2;0-22:2;0)	PE O-	GPL	MEM	PE O-	40	4	3	0	0.64915	0.744314	0.515741		0	0	0
PE O--40:5;0(16:0;0-24:5;0)	PE O-	GPL	MEM	PE O-	40	5	4	0	0	0	0		0	0	0
PE O--40:5;0(16:1;0-24:4;0)	PE O-	GPL	MEM	PE O-	40	5	4	0	0	0	0		0.162441	0.112283	0
PE O--40:5;0(18:0;0-22:5;0)	PE O-	GPL	MEM	PE O-	40	5	4	0	0.214472	0.390784	0.372757		1.00779	0.753084	0.857516
PE O--40:5;0(18:1;0-22:4;0)	PE O-	GPL	MEM	PE O-	40	5	4	0	3.42727	2.70309	2.64502		14.8697	13.541	16.8156
PE O--40:5;0(18:2;0-22:3;0)	PE O-	GPL	MEM	PE O-	40	5	4	0	0.368839	0.472868	0.411241		1.20238	0.89263	1.12859
PE O--40:6;0(16:1;0-24:5;0)	PE O-	GPL	MEM	PE O-	40	6	5	0	0	0	0		0	0.139969	0
PE O--40:6;0(18:0;0-22:6;0)	PE O-	GPL	MEM	PE O-	40	6	5	0	0	0	0.131894		0	0.196825	0.24695
PE O--40:6;0(18:1;0-22:5;0)	PE O-	GPL	MEM	PE O-	40	6	5	0	1.32684	1.34497	1.21653		8.25125	7.76297	7.74031
PE O--40:6;0(18:2;0-22:4;0)	PE O-	GPL	MEM	PE O-	40	6	5	0	1.98819	1.84636	1.65235		8.10412	7.64854	7.1568
PE O--40:7;0(16:1;0-24:6;0)	PE O-	GPL	MEM	PE O-	40	7	6	0	0	0	0		0	0	0
PE O--40:7;0(18:1;0-22:6;0)	PE O-	GPL	MEM	PE O-	40	7	6	0	0	0	0		9.20779	8.37052	10.9848
PE O--40:7;0(18:2;0-22:5;0)	PE O-	GPL	MEM	PE O-	40	7	6	0	0	0	0		10.526	10.816	12.0595
PE O--40:8;0(18:2;0-22:6;0)	PE O-	GPL	MEM	PE O-	40	8	7	0	1.7921	0	1.31006		7.36771	7.0846	8.1266
PE O--42:2;0(18:1;0-24:1;0)	PE O-	GPL	MEM	PE O-	42	2	1	0	0	0	0		0	0	0
PE O--42:3;0(18:0;0-24:3;0)	PE O-	GPL	MEM	PE O-	42	3	2	0	0	0	0		0	0	0
PE O--42:3;0(18:1;0-24:2;0)	PE O-	GPL	MEM	PE O-	42	3	2	0	0	0	0		0	0	0
PE O--42:3;0(18:2;0-24:1;0)	PE O-	GPL	MEM	PE O-	42	3	2	0	0	0	0		0	0	0
PE O--42:4;0(18:0;0-24:4;0)	PE O-	GPL	MEM	PE O-	42	4	3	0	0	0	0		0	0	0
PE O--42:4;0(18:2;0-24:2;0)	PE O-	GPL	MEM	PE O-	42	4	3	0	0	0	0		0	0	0
PE O--42:5;0(18:0;0-24:5;0)	PE O-	GPL	MEM	PE O-	42	5	4	0	0	0	0		0	0	0
PE O--42:6;0(18:2;0-24:4;0)	PE O-	GPL	MEM	PE O-	42	6	5	0	0	0	0		0	0	0
PE O--42:7;0(18:1;0-24:6;0)	PE O-	GPL	MEM	PE O-	42	7	6	0	0.331698	0	0		1.89429	1.59969	2.04135
PE O--42:7;0(18:2;0-24:5;0)	PE O-	GPL	MEM	PE O-	42	7	6	0	0	0	0		0	0	0
PE O--42:8;0(18:2;0-24:6;0)	PE O-	GPL	MEM	PE O-	42	8	7	0	0	0	0		0	0	0
PG-28:6;0(14:3;0-14:3;0)	PG	GPL	MEM	PG	28	6	6	0	0	0	0		0	0	0
PG-30:0;0(12:0;0-18:0;0)	PG	GPL	MEM	PG	30	0	0	0	0	0	0		0	0	0
PG-30:0;0(14:0;0-16:0;0)	PG	GPL	MEM	PG	30	0	0	0	0	0	0		0	0	0
PG-30:0;0(15:0;0-15:0;0)	PG	GPL	MEM	PG	30	0	0	0	0	0	0		0	0	0
PG-32:0;0(14:0;0-18:0;0)	PG	GPL	MEM	PG	32	0	0	0	0	0	0		0	0	0
PG-32:0;0(16:0;0-16:0;0)	PG	GPL	MEM	PG	32	0	0	0	0	0	0		0	0	0
PG-32:1;0(14:0;0-18:1;0)	PG	GPL	MEM	PG	32	1	1	0	0.288643	0.274357	0.284458		0.178219	0.166442	0.20791
PG-32:1;0(16:1;0-16:0;0)	PG	GPL	MEM	PG	32	1	1	0	0.275104	0.233403	0.268741		0.246226	0.247942	0.275377
PG-32:2;0(14:0;0-18:2;0)	PG	GPL	MEM	PG	32	2	2	0	0	0	0		0	0	0
PG-32:2;0(16:1;0-16:1;0)	PG	GPL	MEM	PG	32	2	2	0	0	0	0		0	0	0
PG-33:0;0(15:0;0-18:0;0)	PG	GPL	MEM	PG	33	0	0	0	0	0	0		0	0	0
PG-33:1;0(15:0;0-18:1;0)	PG	GPL	MEM	PG	33	1	1	0	0.054727	0.158445	0		0	0	0
PG-33:1;0(16:0;0-17:1;0)	PG	GPL	MEM	PG	33	1	1	0	0.067877	0	0		0	0	0
PG-33:1;0(16:1;0-17:0;0)	PG	GPL	MEM	PG	33	1	1	0	0.013409	0	0		0	0	0
PG-34:0;0(16:0;0-18:0;0)	PG	GPL	MEM	PG	34	0	0	0	0	0	0		0	0	0
PG-34:1;0(16:0;0-18:1;0)	PG	GPL	MEM	PG	34	1	1	0	5.99133	6.44589	5.76686		1.71213	2.07953	1.83708
PG-34:1;0(16:1;0-18:0;0)	PG	GPL	MEM	PG	34	1	1	0	0	0	0		0.186913	0.143587	0
PG-34:1;0(17:1;0-17:0;0)	PG	GPL	MEM	PG	34	1	1	0	0	0	0		0.063112	0	0
PG-34:2;0(16:0;0-18:2;0)	PG	GPL	MEM	PG	34	2	2	0	0.065216	0.052501	0.075305		0.011059	0	0
PG-34:2;0(16:1;0-18:1;0)	PG	GPL	MEM	PG	34	2	2	0	2.57464	2.6297	2.54144		0.305283	0.316994	0.284735
PG-34:2;0(17:1;0-17:1;0)	PG	GPL	MEM	PG	34	2	2	0	0.005861	0.005921	0.006881		0	0	0
PG-34:3;0(14:0;0-20:3;0)	PG	GPL	MEM	PG	34	3	3	0	0	0	0		0	0	0
PG-34:3;0(16:1;0-18:2;0)	PG	GPL	MEM	PG	34	3	3	0	0.177609	0	0		0	0	0
PG-34:3;0(16:2;0-18:1;0)	PG	GPL	MEM	PG	34	3	3	0	0	0	0		0	0	0
PG-35:0;0(17:0;0-18:0;0)	PG	GPL	MEM	PG	35	0	0	0	0	0	0		0	0	0
PG-35:1;0(16:0;0-19:1;0)	PG	GPL	MEM	PG	35	1	1	0	0.182291	0.174548	0.154874		0	0	0
PG-35:1;0(17:0;0-18:1;0)	PG	GPL	MEM	PG	35	1	1	0	0.405907	0.401939	0.367367		0	0	0
PG-35:1;0(17:1;0-18:0;0)	PG	GPL	MEM	PG	35	1	1	0	0.138829	0.122227	0.098833		0	0	0
PG-35:2;0(16:0;0-19:2;0)	PG	GPL	MEM	PG	35	2	2	0	0	0	0		0	0	0
PG-35:2;0(16:1;0-19:1;0)	PG	GPL	MEM	PG	35	2	2	0	0.028142	0	0.037314		0	0	0
PG-35:2;0(17:0;0-18:2;0)	PG	GPL	MEM	PG	35	2	2	0	0	0	0		0	0	0
PG-35:2;0(17:1;0-18:1;0)	PG	GPL	MEM	PG	35	2	2	0	0.70265	0.777868	0.744239		0	0	0
PG-35:3;0(16:1;0-19:2;0)	PG	GPL	MEM	PG	35	3	3	0	0	0	0		0	0	0
PG-35:3;0(17:1;0-18:2;0)	PG	GPL	MEM	PG	35	3	3	0	0	0	0		0	0	0
PG-36:1;0(16:0;0-20:1;0)	PG	GPL	MEM	PG	36	1	1	0	0.059281	0.041109	0.043942		0.206528	0.265402	0.218139
PG-36:1;0(16:1;0-20:0;0)	PG	GPL	MEM	PG	36	1	1	0	0.025654	0	0		0	0	0
PG-36:1;0(18:1;0-18:0;0)	PG	GPL	MEM	PG	36	1	1	0	0.834649	0.692217	0.636847		1.48156	1.55372	1.27795
PG-36:2;0(16:0;0-20:2;0)	PG	GPL	MEM	PG	36	2	2	0	0.089539	0.117096	0.126353		0	0	0
PG-36:2;0(16:1;0-20:1;0)	PG	GPL	MEM	PG	36	2	2	0	0	0	0.094055		0	0	0
PG-36:2;0(18:1;0-18:1;0)	PG	GPL	MEM	PG	36	2	2	0	30.4649	32.0682	30.3307		1.22457	1.45262	1.20458
PG-36:2;0(18:2;0-18:0;0)	PG	GPL	MEM	PG	36	2	2	0	0	0.152454	0		0.065328	0.064557	0.04223
PG-36:3;0(14:3;0-22:0;0)	PG	GPL	MEM	PG	36	3	3	0	0	0	0		0	0	0
PG-36:3;0(16:0;0-20:3;0)	PG	GPL	MEM	PG	36	3	3	0	0	0	0		0	0	0
PG-36:3;0(16:1;0-20:2;0)	PG	GPL	MEM	PG	36	3	3	0	0.133528	0.137901	0.097992		0	0	0
PG-36:3;0(18:2;0-18:1;0)	PG	GPL	MEM	PG	36	3	3	0	0.985952	0.970842	0.936694		0	0	0
PG-36:4;0(14:0;0-22:4;0)	PG	GPL	MEM	PG	36	4	4	0	0	0	0		0	0	0
PG-36:4;0(16:0;0-20:4;0)	PG	GPL	MEM	PG	36	4	4	0	0	0	0		0	0	0
PG-36:4;0(16:1;0-20:3;0)	PG	GPL	MEM	PG	36	4	4	0	0	0	0		0	0	0
PG-36:4;0(18:2;0-18:2;0)	PG	GPL	MEM	PG	36	4	4	0	0	0	0		0	0	0
PG-36:4;0(18:3;0-18:1;0)	PG	GPL	MEM	PG	36	4	4	0	0	0	0		0	0	0
PG-36:5;0(16:1;0-20:4;0)	PG	GPL	MEM	PG	36	5	5	0	0	0	0		0	0	0
PG-37:1;0(18:0;0-19:1;0)	PG	GPL	MEM	PG	37	1	1	0	0	0	0		0	0	0
PG-37:2;0(17:0;0-20:2;0)	PG	GPL	MEM	PG	37	2	2	0	0	0	0		0	0	0
PG-37:2;0(17:1;0-20:1;0)	PG	GPL	MEM	PG	37	2	2	0	0	0	0		0	0	0
PG-37:2;0(18:1;0-19:1;0)	PG	GPL	MEM	PG	37	2	2	0	0.407713	0.505605	0.450446		0	0	0
PG-37:3;0(17:0;0-20:3;0)	PG	GPL	MEM	PG	37	3	3	0	0	0	0		0	0	0
PG-37:3;0(17:1;0-20:2;0)	PG	GPL	MEM	PG	37	3	3	0	0	0	0		0	0	0
PG-37:3;0(18:1;0-19:2;0)	PG	GPL	MEM	PG	37	3	3	0	0	0	0		0	0	0
PG-37:3;0(18:2;0-19:1;0)	PG	GPL	MEM	PG	37	3	3	0	0	0	0		0	0	0
PG-37:4;0(16:1;0-21:3;0)	PG	GPL	MEM	PG	37	4	4	0	0	0	0		0	0	0
PG-37:4;0(17:0;0-20:4;0)	PG	GPL	MEM	PG	37	4	4	0	0	0	0		0	0	0
PG-37:4;0(17:1;0-20:3;0)	PG	GPL	MEM	PG	37	4	4	0	0	0	0		0	0	0
PG-37:4;0(18:1;0-19:3;0)	PG	GPL	MEM	PG	37	4	4	0	0	0	0		0	0	0
PG-38:1;0(18:0;0-20:1;0)	PG	GPL	MEM	PG	38	1	1	0	0	0	0		0	0	0
PG-38:1;0(18:1;0-20:0;0)	PG	GPL	MEM	PG	38	1	1	0	0	0	0		0	0	0
PG-38:2;0(16:2;0-22:0;0)	PG	GPL	MEM	PG	38	2	2	0	0	0.025137	0		0	0	0
PG-38:2;0(18:0;0-20:2;0)	PG	GPL	MEM	PG	38	2	2	0	0	0.090416	0.080208		0	0	0
PG-38:2;0(18:1;0-20:1;0)	PG	GPL	MEM	PG	38	2	2	0	0.79933	0.913033	0.777101		0	0	0
PG-38:2;0(19:1;0-19:1;0)	PG	GPL	MEM	PG	38	2	2	0	0	0	0		0	0	0
PG-38:3;0(16:1;0-22:2;0)	PG	GPL	MEM	PG	38	3	3	0	0	0	0		0	0	0
PG-38:3;0(18:0;0-20:3;0)	PG	GPL	MEM	PG	38	3	3	0	0	0	0		0	0	0
PG-38:3;0(18:1;0-20:2;0)	PG	GPL	MEM	PG	38	3	3	0	1.09977	1.00631	1.01722		0	0	0
PG-38:3;0(18:2;0-20:1;0)	PG	GPL	MEM	PG	38	3	3	0	0	0.04365	0		0	0	0
PG-38:4;0(16:0;0-22:4;0)	PG	GPL	MEM	PG	38	4	4	0	0	0	0		0	0	0
PG-38:4;0(16:1;0-22:3;0)	PG	GPL	MEM	PG	38	4	4	0	0	0	0		0	0	0
PG-38:4;0(18:0;0-20:4;0)	PG	GPL	MEM	PG	38	4	4	0	0	0	0		0	0	0
PG-38:4;0(18:1;0-20:3;0)	PG	GPL	MEM	PG	38	4	4	0	0.288224	0.291254	0.336063		0	0	0
PG-38:4;0(18:2;0-20:2;0)	PG	GPL	MEM	PG	38	4	4	0	0	0	0		0	0	0
PG-38:5;0(16:0;0-22:5;0)	PG	GPL	MEM	PG	38	5	5	0	0	0	0		0	0	0
PG-38:5;0(18:2;0-20:3;0)	PG	GPL	MEM	PG	38	5	5	0	0	0	0		0	0	0
PG-38:6;0(16:1;0-22:5;0)	PG	GPL	MEM	PG	38	6	6	0	0	0	0		0	0	0
PG-38:6;0(18:2;0-20:4;0)	PG	GPL	MEM	PG	38	6	6	0	0	0	0		0	0	0
PG-38:7;0(16:1;0-22:6;0)	PG	GPL	MEM	PG	38	7	7	0	0	0	0		0	0	0
PG-38:7;0(16:3;0-22:4;0)	PG	GPL	MEM	PG	38	7	7	0	0	0	0		0	0	0
PG-40:5;0(18:0;0-22:5;0)	PG	GPL	MEM	PG	40	5	5	0	0	0	0		0	0	0
PG-40:5;0(18:1;0-22:4;0)	PG	GPL	MEM	PG	40	5	5	0	0	0	0		0	0	0
PG-40:5;0(20:3;0-20:2;0)	PG	GPL	MEM	PG	40	5	5	0	0	0	0		0	0	0
PG-40:5;0(20:4;0-20:1;0)	PG	GPL	MEM	PG	40	5	5	0	0	0	0		0	0	0
PG-40:6;0(18:0;0-22:6;0)	PG	GPL	MEM	PG	40	6	6	0	0	0	0		0	0	0
PG-40:6;0(18:1;0-22:5;0)	PG	GPL	MEM	PG	40	6	6	0	0	0	0		0	0	0
PG-40:6;0(18:2;0-22:4;0)	PG	GPL	MEM	PG	40	6	6	0	0	0	0		0	0	0
PG-40:6;0(20:4;0-20:2;0)	PG	GPL	MEM	PG	40	6	6	0	0	0	0		0	0	0
PG-40:7;0(16:1;0-24:6;0)	PG	GPL	MEM	PG	40	7	7	0	0	0	0		0	0	0
PG-40:7;0(18:1;0-22:6;0)	PG	GPL	MEM	PG	40	7	7	0	17.3522	19.3229	17.8364		0	0	0
PG-40:7;0(20:4;0-20:3;0)	PG	GPL	MEM	PG	40	7	7	0	0	0	0		0	0	0
PG-40:8;0(20:4;0-20:4;0)	PG	GPL	MEM	PG	40	8	8	0	0	0	0		0	0	0
PG-42:10;0(20:4;0-22:6;0)	PG	GPL	MEM	PG	42	10	10	0	0	0	0		0	0	0
PG-42:7;0(20:3;0-22:4;0)	PG	GPL	MEM	PG	42	7	7	0	0	0	0		0	0	0
PG-42:8;0(20:3;0-22:5;0)	PG	GPL	MEM	PG	42	8	8	0	0	0	0		0	0	0
PG-42:8;0(20:4;0-22:4;0)	PG	GPL	MEM	PG	42	8	8	0	0	0	0		0	0	0
PG-42:9;0(20:3;0-22:6;0)	PG	GPL	MEM	PG	42	9	9	0	0	0	0		0	0	0
PG-42:9;0(20:4;0-22:5;0)	PG	GPL	MEM	PG	42	9	9	0	0	0	0		0	0	0
PG-44:10;0(22:5;0-22:5;0)	PG	GPL	MEM	PG	44	10	10	0	0	0	0		0	0	0
PG-44:11;0(22:6;0-22:5;0)	PG	GPL	MEM	PG	44	11	11	0	0	0	0		0	0	0
PG-44:12;0(22:6;0-22:6;0)	PG	GPL	MEM	PG	44	12	12	0	2.78325	3.27888	2.85393		0	0	0
PG-44:9;0(22:5;0-22:4;0)	PG	GPL	MEM	PG	44	9	9	0	0	0	0		0	0	0
PI-29:6;0(17:6;0-12:0;0)	PI	GPL	MEM	PI	29	6	6	0	0	0	0		0	0	0
PI-30:0;0(15:0;0-15:0;0)	PI	GPL	MEM	PI	30	0	0	0	0	0	0		0	0	0
PI-30:0;0(16:0;0-14:0;0)	PI	GPL	MEM	PI	30	0	0	0	0	0	0		0	0	0
PI-30:1;0(16:1;0-14:0;0)	PI	GPL	MEM	PI	30	1	1	0	0	0	0		0	0	0
PI-30:1;0(18:1;0-12:0;0)	PI	GPL	MEM	PI	30	1	1	0	0	0	0		0	0	0
PI-31:0;0(16:0;0-15:0;0)	PI	GPL	MEM	PI	31	0	0	0	0.165956	0.174337	0.170488		0	0	0
PI-31:0;0(17:0;0-14:0;0)	PI	GPL	MEM	PI	31	0	0	0	0	0	0		0	0	0
PI-31:1;0(16:1;0-15:0;0)	PI	GPL	MEM	PI	31	1	1	0	0	0	0		0	0	0
PI-31:1;0(17:1;0-14:0;0)	PI	GPL	MEM	PI	31	1	1	0	0	0	0		0	0	0
PI-32:0;0(18:0;0-14:0;0)	PI	GPL	MEM	PI	32	0	0	0	0	0	0		0	0	0
PI-32:1;0(16:0;0-16:1;0)	PI	GPL	MEM	PI	32	1	1	0	1.06053	0.992018	1.01476		1.13247	0.993703	1.27704
PI-32:1;0(17:1;0-15:0;0)	PI	GPL	MEM	PI	32	1	1	0	0	0.076832	0		0	0	0
PI-32:1;0(18:0;0-14:1;0)	PI	GPL	MEM	PI	32	1	1	0	0.140337	0.089281	0.105262		0	0	0
PI-32:1;0(18:1;0-14:0;0)	PI	GPL	MEM	PI	32	1	1	0	0.231709	0.331484	0.231106		0	0	0
PI-32:2;0(16:0;0-16:2;0)	PI	GPL	MEM	PI	32	2	2	0	0	0	0		0	0	0
PI-32:2;0(16:1;0-16:1;0)	PI	GPL	MEM	PI	32	2	2	0	0.130894	0.056438	0.168361		0	0	0
PI-32:2;0(18:1;0-14:1;0)	PI	GPL	MEM	PI	32	2	2	0	0	0.102906	0		0	0	0
PI-32:2;0(18:2;0-14:0;0)	PI	GPL	MEM	PI	32	2	2	0	0	0	0		0	0	0
PI-33:0;0(17:0;0-16:0;0)	PI	GPL	MEM	PI	33	0	0	0	0.17634	0.14914	0.121326		0	0	0
PI-33:0;0(18:0;0-15:0;0)	PI	GPL	MEM	PI	33	0	0	0	0	0.068355	0.074333		0	0	0
PI-33:1;0(17:0;0-16:1;0)	PI	GPL	MEM	PI	33	1	1	0	0.039038	0.032008	0.034298		0	0	0.123893
PI-33:1;0(17:1;0-16:0;0)	PI	GPL	MEM	PI	33	1	1	0	0.118648	0.095852	0.108274		0	0.334628	0.309956
PI-33:1;0(18:0;0-15:1;0)	PI	GPL	MEM	PI	33	1	1	0	0	0	0		0	0	0
PI-33:1;0(18:1;0-15:0;0)	PI	GPL	MEM	PI	33	1	1	0	0.197153	0.173425	0.216506		0	0	0
PI-33:2;0(17:1;0-16:1;0)	PI	GPL	MEM	PI	33	2	2	0	0	0	0		0	0	0
PI-33:2;0(18:1;0-15:1;0)	PI	GPL	MEM	PI	33	2	2	0	0	0	0		0	0	0
PI-33:2;0(18:2;0-15:0;0)	PI	GPL	MEM	PI	33	2	2	0	0	0	0		0	0	0
PI-34:0;0(17:0;0-17:0;0)	PI	GPL	MEM	PI	34	0	0	0	0	0	0		0	0	0
PI-34:0;0(18:0;0-16:0;0)	PI	GPL	MEM	PI	34	0	0	0	0	0	0		0	0	0
PI-34:1;0(17:0;0-17:1;0)	PI	GPL	MEM	PI	34	1	1	0	0.476571	0.696592	0		0.475356	0	0
PI-34:1;0(18:0;0-16:1;0)	PI	GPL	MEM	PI	34	1	1	0	2.5482	2.83035	2.69258		2.54263	2.09039	2.83892
PI-34:1;0(18:1;0-16:0;0)	PI	GPL	MEM	PI	34	1	1	0	21.0456	22.5588	20.568		12.0753	11.6174	13.7308
PI-34:2;0(17:1;0-17:1;0)	PI	GPL	MEM	PI	34	2	2	0	0	0.065394	0.041202		0	0	0.067173
PI-34:2;0(18:0;0-16:2;0)	PI	GPL	MEM	PI	34	2	2	0	0	0	0		0	0	0
PI-34:2;0(18:1;0-16:1;0)	PI	GPL	MEM	PI	34	2	2	0	3.13791	3.38168	3.07243		2.0722	2.01743	2.34159
PI-34:2;0(18:2;0-16:0;0)	PI	GPL	MEM	PI	34	2	2	0	0.816315	0.847806	0.727048		0.808837	0.542773	0.717688
PI-34:3;0(18:0;0-16:3;0)	PI	GPL	MEM	PI	34	3	3	0	0	0	0		0	0	0
PI-34:3;0(18:1;0-16:2;0)	PI	GPL	MEM	PI	34	3	3	0	0	0	0		0	0	0
PI-34:3;0(18:2;0-16:1;0)	PI	GPL	MEM	PI	34	3	3	0	0	0.4292	0		0	0	0
PI-34:3;0(18:3;0-16:0;0)	PI	GPL	MEM	PI	34	3	3	0	0	0	0		0	0	0
PI-34:3;0(20:3;0-14:0;0)	PI	GPL	MEM	PI	34	3	3	0	0	0	0		0	0	0
PI-35:0;0(18:0;0-17:0;0)	PI	GPL	MEM	PI	35	0	0	0	0.228299	0	0		0	0	0
PI-35:1;0(18:0;0-17:1;0)	PI	GPL	MEM	PI	35	1	1	0	0.411952	0.412241	0.39942		0	0.28536	0
PI-35:1;0(18:1;0-17:0;0)	PI	GPL	MEM	PI	35	1	1	0	2.11257	2.26698	2.01159		1.68907	1.07014	1.81589
PI-35:1;0(19:0;0-16:1;0)	PI	GPL	MEM	PI	35	1	1	0	0	0	0		0	0	0
PI-35:1;0(19:1;0-16:0;0)	PI	GPL	MEM	PI	35	1	1	0	0.313344	0.356828	0.248018		0	0	0
PI-35:2;0(18:1;0-17:1;0)	PI	GPL	MEM	PI	35	2	2	0	0.992287	1.01719	0.91824		0.725245	0.515368	0.684679
PI-35:2;0(18:2;0-17:0;0)	PI	GPL	MEM	PI	35	2	2	0	0.094659	0.07668	0.082883		0	0	0
PI-35:2;0(19:1;0-16:1;0)	PI	GPL	MEM	PI	35	2	2	0	0	0.01553	0		0	0	0
PI-35:2;0(19:2;0-16:0;0)	PI	GPL	MEM	PI	35	2	2	0	0.099191	0.106172	0.097434		0	0	0
PI-35:2;0(20:2;0-15:0;0)	PI	GPL	MEM	PI	35	2	2	0	0	0.078424	0		0	0	0
PI-35:3;0(18:2;0-17:1;0)	PI	GPL	MEM	PI	35	3	3	0	0	0	0		0	0	0
PI-35:3;0(19:3;0-16:0;0)	PI	GPL	MEM	PI	35	3	3	0	0	0	0		0	0	0
PI-36:0;0(18:0;0-18:0;0)	PI	GPL	MEM	PI	36	0	0	0	0	0	0		0	0	0
PI-36:1;0(18:0;0-18:1;0)	PI	GPL	MEM	PI	36	1	1	0	66.1299	70.0341	62.9456		43.2655	40.0231	46.2362
PI-36:1;0(19:1;0-17:0;0)	PI	GPL	MEM	PI	36	1	1	0	0	0.107648	0		0	0	0
PI-36:1;0(20:1;0-16:0;0)	PI	GPL	MEM	PI	36	1	1	0	0.850775	1.03573	0.859929		0.833428	0.609098	0.706163
PI-36:2;0(18:0;0-18:2;0)	PI	GPL	MEM	PI	36	2	2	0	4.36293	5.02729	4.35258		3.10944	3.08804	3.5787
PI-36:2;0(18:1;0-18:1;0)	PI	GPL	MEM	PI	36	2	2	0	36.9983	40.7683	34.9513		20.701	18.1939	21.6084
PI-36:2;0(19:2;0-17:0;0)	PI	GPL	MEM	PI	36	2	2	0	0	0	0		0	0	0
PI-36:2;0(20:1;0-16:1;0)	PI	GPL	MEM	PI	36	2	2	0	0	0.166683	0.145521		0	0	0
PI-36:2;0(20:2;0-16:0;0)	PI	GPL	MEM	PI	36	2	2	0	4.57501	5.20207	4.6755		1.5553	1.71605	1.63511
PI-36:3;0(18:0;0-18:3;0)	PI	GPL	MEM	PI	36	3	3	0	0	0	0		0	0	0
PI-36:3;0(18:1;0-18:2;0)	PI	GPL	MEM	PI	36	3	3	0	1.75558	2.01369	1.90394		1.47394	1.42159	1.80856
PI-36:3;0(19:3;0-17:0;0)	PI	GPL	MEM	PI	36	3	3	0	0	0	0		0	0	0
PI-36:3;0(20:2;0-16:1;0)	PI	GPL	MEM	PI	36	3	3	0	0.149584	0.105143	0		0	0	0
PI-36:3;0(20:3;0-16:0;0)	PI	GPL	MEM	PI	36	3	3	0	0.716178	0.69812	0.652668		0.924166	1.00751	1.394
PI-36:4;0(18:1;0-18:3;0)	PI	GPL	MEM	PI	36	4	4	0	0	0	0		0	0	0
PI-36:4;0(18:2;0-18:2;0)	PI	GPL	MEM	PI	36	4	4	0	0	0.069311	0		0	0	0
PI-36:4;0(20:3;0-16:1;0)	PI	GPL	MEM	PI	36	4	4	0	0	0	0		0	0	0
PI-36:4;0(20:4;0-16:0;0)	PI	GPL	MEM	PI	36	4	4	0	1.69682	1.77609	1.69133		1.56682	1.64281	2.0266
PI-36:5;0(20:4;0-16:1;0)	PI	GPL	MEM	PI	36	5	5	0	0	0	0		0	0	0
PI-36:5;0(20:5;0-16:0;0)	PI	GPL	MEM	PI	36	5	5	0	0	0	0		0	0	0
PI-37:1;0(19:0;0-18:1;0)	PI	GPL	MEM	PI	37	1	1	0	0.162773	0.225693	0.184714		0	0	0
PI-37:1;0(19:1;0-18:0;0)	PI	GPL	MEM	PI	37	1	1	0	0.298688	0.390187	0.34824		0	0	0.470775
PI-37:1;0(20:1;0-17:0;0)	PI	GPL	MEM	PI	37	1	1	0	0.079251	0.076906	0.035174		0	0	0
PI-37:2;0(19:1;0-18:1;0)	PI	GPL	MEM	PI	37	2	2	0	0.744427	0.961401	0.691233		0	0	0.400905
PI-37:2;0(19:2;0-18:0;0)	PI	GPL	MEM	PI	37	2	2	0	1.87924	1.94322	1.68611		1.14053	0.907066	0.78426
PI-37:2;0(20:1;0-17:1;0)	PI	GPL	MEM	PI	37	2	2	0	0	0	0		0	0	0
PI-37:2;0(20:2;0-17:0;0)	PI	GPL	MEM	PI	37	2	2	0	0.776257	0.956657	0.850025		0	0	0
PI-37:2;0(21:2;0-16:0;0)	PI	GPL	MEM	PI	37	2	2	0	0	0	0		0	0	0
PI-37:3;0(19:1;0-18:2;0)	PI	GPL	MEM	PI	37	3	3	0	0	0	0		0	0	0
PI-37:3;0(19:2;0-18:1;0)	PI	GPL	MEM	PI	37	3	3	0	0.531183	0.415157	0.40279		0	0	0
PI-37:3;0(19:3;0-18:0;0)	PI	GPL	MEM	PI	37	3	3	0	0	0.225578	0		0	0	0
PI-37:3;0(20:2;0-17:1;0)	PI	GPL	MEM	PI	37	3	3	0	0	0	0		0.42119	0	0
PI-37:3;0(20:3;0-17:0;0)	PI	GPL	MEM	PI	37	3	3	0	0.174152	0.179578	0.291877		0	0	0
PI-37:3;0(21:3;0-16:0;0)	PI	GPL	MEM	PI	37	3	3	0	0	0	0		0	0	0
PI-37:4;0(19:3;0-18:1;0)	PI	GPL	MEM	PI	37	4	4	0	0	0	0		0	0	0
PI-37:4;0(20:3;0-17:1;0)	PI	GPL	MEM	PI	37	4	4	0	0	0	0		0	0.272893	0
PI-37:4;0(20:4;0-17:0;0)	PI	GPL	MEM	PI	37	4	4	0	0.433455	0.456214	0.379317		0	0	0
PI-37:5;0(20:4;0-17:1;0)	PI	GPL	MEM	PI	37	5	5	0	0	0	0		0	0	0
PI-38:1;0(20:1;0-18:0;0)	PI	GPL	MEM	PI	38	1	1	0	0	0	0		0	0	0
PI-38:2;0(20:1;0-18:1;0)	PI	GPL	MEM	PI	38	2	2	0	2.64442	3.29039	2.72627		1.11025	1.15655	1.31564
PI-38:2;0(20:2;0-18:0;0)	PI	GPL	MEM	PI	38	2	2	0	36.197	41.2383	34.6863		9.89461	9.18205	10.1771
PI-38:2;0(22:2;0-16:0;0)	PI	GPL	MEM	PI	38	2	2	0	0	0	0		0	0	0
PI-38:3;0(20:1;0-18:2;0)	PI	GPL	MEM	PI	38	3	3	0	0	0	0		0	0	0
PI-38:3;0(20:2;0-18:1;0)	PI	GPL	MEM	PI	38	3	3	0	5.08259	5.98378	4.8702		1.89637	1.39367	1.99134
PI-38:3;0(20:3;0-18:0;0)	PI	GPL	MEM	PI	38	3	3	0	11.2778	12.8353	10.7011		12.259	10.9181	12.6334
PI-38:3;0(22:3;0-16:0;0)	PI	GPL	MEM	PI	38	3	3	0	0	0	0		0	0	0
PI-38:4;0(20:2;0-18:2;0)	PI	GPL	MEM	PI	38	4	4	0	0	0	0		0	0	0
PI-38:4;0(20:3;0-18:1;0)	PI	GPL	MEM	PI	38	4	4	0	1.98504	2.386	1.94242		2.15547	1.77099	0
PI-38:4;0(20:4;0-18:0;0)	PI	GPL	MEM	PI	38	4	4	0	28.0138	31.7564	26.123		20.3173	19.9379	25.0327
PI-38:4;0(22:4;0-16:0;0)	PI	GPL	MEM	PI	38	4	4	0	0.368969	0	0		0	0	0
PI-38:5;0(20:3;0-18:2;0)	PI	GPL	MEM	PI	38	5	5	0	0	0	0		0	0	0
PI-38:5;0(20:4;0-18:1;0)	PI	GPL	MEM	PI	38	5	5	0	3.35542	3.66606	3.22929		3.76181	2.05412	4.11072
PI-38:5;0(20:5;0-18:0;0)	PI	GPL	MEM	PI	38	5	5	0	1.70016	1.96169	1.71795		0	1.34395	0
PI-38:5;0(22:5;0-16:0;0)	PI	GPL	MEM	PI	38	5	5	0	0	0	0		0	0	0
PI-38:6;0(20:4;0-18:2;0)	PI	GPL	MEM	PI	38	6	6	0	0	0	0		0	0	0
PI-38:6;0(20:5;0-18:1;0)	PI	GPL	MEM	PI	38	6	6	0	0	0	0		0	0	0
PI-38:6;0(22:5;0-16:1;0)	PI	GPL	MEM	PI	38	6	6	0	0	0	0		0	0	0
PI-38:6;0(22:6;0-16:0;0)	PI	GPL	MEM	PI	38	6	6	0	0	0	0		0	0	0
PI-39:2;0(20:2;0-19:0;0)	PI	GPL	MEM	PI	39	2	2	0	0.099377	0.08112	0.274042		0	0	0
PI-39:2;0(21:2;0-18:0;0)	PI	GPL	MEM	PI	39	2	2	0	0	0.259056	0		0	0	0
PI-39:2;0(22:1;0-17:1;0)	PI	GPL	MEM	PI	39	2	2	0	0.185778	0	0		0	0	0
PI-39:3;0(20:2;0-19:1;0)	PI	GPL	MEM	PI	39	3	3	0	0	0.065192	0		0	0	0
PI-39:3;0(20:3;0-19:0;0)	PI	GPL	MEM	PI	39	3	3	0	0	0.068858	0		0	0	0
PI-39:3;0(21:2;0-18:1;0)	PI	GPL	MEM	PI	39	3	3	0	0	0	0		0	0	0
PI-39:3;0(21:3;0-18:0;0)	PI	GPL	MEM	PI	39	3	3	0	0.549319	0.4346	0.549979		0	0	0
PI-39:4;0(20:3;0-19:1;0)	PI	GPL	MEM	PI	39	4	4	0	0	0	0		0	0	0
PI-39:4;0(20:4;0-19:0;0)	PI	GPL	MEM	PI	39	4	4	0	0	0	0		0	0	0
PI-39:4;0(21:3;0-18:1;0)	PI	GPL	MEM	PI	39	4	4	0	0	0	0		0	0	0
PI-39:4;0(21:4;0-18:0;0)	PI	GPL	MEM	PI	39	4	4	0	0	0	0		0	0	0
PI-39:4;0(22:4;0-17:0;0)	PI	GPL	MEM	PI	39	4	4	0	0	0	0		0	0	0
PI-39:5;0(20:3;0-19:2;0)	PI	GPL	MEM	PI	39	5	5	0	0	0	0		0	0	0
PI-39:5;0(20:4;0-19:1;0)	PI	GPL	MEM	PI	39	5	5	0	0	0	0		0	0	0
PI-39:5;0(22:5;0-17:0;0)	PI	GPL	MEM	PI	39	5	5	0	0	0	0		0	0	0
PI-39:6;0(22:5;0-17:1;0)	PI	GPL	MEM	PI	39	6	6	0	0	0	0		0	0	0
PI-39:6;0(22:6;0-17:0;0)	PI	GPL	MEM	PI	39	6	6	0	0	0	0		0	0	0
PI-40:3;0(22:2;0-18:1;0)	PI	GPL	MEM	PI	40	3	3	0	0	20.6683	0		0	0	0
PI-40:4;0(20:0;0-20:4;0)	PI	GPL	MEM	PI	40	4	4	0	0	0	0		0	0	0
PI-40:4;0(20:1;0-20:3;0)	PI	GPL	MEM	PI	40	4	4	0	0	0	0		0	0	0
PI-40:4;0(20:2;0-20:2;0)	PI	GPL	MEM	PI	40	4	4	0	0.135204	0.097997	0		0	0	0
PI-40:4;0(22:3;0-18:1;0)	PI	GPL	MEM	PI	40	4	4	0	0	0	0		0	0	0
PI-40:4;0(22:4;0-18:0;0)	PI	GPL	MEM	PI	40	4	4	0	5.57849	5.64522	5.71814		6.96731	7.50144	9.98557
PI-40:4;0(24:4;0-16:0;0)	PI	GPL	MEM	PI	40	4	4	0	0	0	0		0	0	0
PI-40:5;0(20:1;0-20:4;0)	PI	GPL	MEM	PI	40	5	5	0	0	0	0		0	0	0
PI-40:5;0(20:2;0-20:3;0)	PI	GPL	MEM	PI	40	5	5	0	0	0	0		0	0	0
PI-40:5;0(22:4;0-18:1;0)	PI	GPL	MEM	PI	40	5	5	0	0	0.313029	0		0	0	0
PI-40:5;0(22:5;0-18:0;0)	PI	GPL	MEM	PI	40	5	5	0	2.64343	2.55791	2.47701		2.63481	2.62367	3.36699
PI-40:6;0(20:2;0-20:4;0)	PI	GPL	MEM	PI	40	6	6	0	0	0.27805	0		0	0	0
PI-40:6;0(20:3;0-20:3;0)	PI	GPL	MEM	PI	40	6	6	0	0	0	0		0	0	0
PI-40:6;0(22:4;0-18:2;0)	PI	GPL	MEM	PI	40	6	6	0	0	0	0		0	0	0
PI-40:6;0(22:5;0-18:1;0)	PI	GPL	MEM	PI	40	6	6	0	0	0	0		0	0	0
PI-40:6;0(22:6;0-18:0;0)	PI	GPL	MEM	PI	40	6	6	0	2.83067	2.87458	2.73262		2.66154	0	0
PI-40:7;0(20:3;0-20:4;0)	PI	GPL	MEM	PI	40	7	7	0	0	0	0		0	0	0
PI-40:7;0(22:6;0-18:1;0)	PI	GPL	MEM	PI	40	7	7	0	0	0	0		0	0	0
PI-40:8;0(20:4;0-20:4;0)	PI	GPL	MEM	PI	40	8	8	0	0	0	0		0	0	0
PI-42:4;0(24:4;0-18:0;0)	PI	GPL	MEM	PI	42	4	4	0	0	0	0		0	0	0
PI-42:5;0(24:4;0-18:1;0)	PI	GPL	MEM	PI	42	5	5	0	0	0	0		0	0	0
PI-42:5;0(24:5;0-18:0;0)	PI	GPL	MEM	PI	42	5	5	0	0	0	0		0	0	0
PI-42:6;0(24:6;0-18:0;0)	PI	GPL	MEM	PI	42	6	6	0	0	0	0		0	0	0
PS-28:0;0(12:0;0-16:0;0)	PS	GPL	MEM	PS	28	0	0	0	0	0	0		0	0	0
PS-30:0;0(14:0;0-16:0;0)	PS	GPL	MEM	PS	30	0	0	0	0	0	0		0	0	0
PS-30:0;0(15:0;0-15:0;0)	PS	GPL	MEM	PS	30	0	0	0	0	0	0		0	0	0
PS-30:1;0(14:0;0-16:1;0)	PS	GPL	MEM	PS	30	1	1	0	0	0	0		0	0	0
PS-30:1;0(14:1;0-16:0;0)	PS	GPL	MEM	PS	30	1	1	0	0	0	0		0	0	0
PS-31:0;0(14:0;0-17:0;0)	PS	GPL	MEM	PS	31	0	0	0	0	0	0		0	0	0
PS-31:1;0(15:0;0-16:1;0)	PS	GPL	MEM	PS	31	1	1	0	0	0	0		0	0	0
PS-32:0;0(14:0;0-18:0;0)	PS	GPL	MEM	PS	32	0	0	0	0	0	0		0	0	0
PS-32:0;0(16:0;0-16:0;0)	PS	GPL	MEM	PS	32	0	0	0	0	0	0		0	0	0
PS-32:1;0(14:0;0-18:1;0)	PS	GPL	MEM	PS	32	1	1	0	0	0	0		0	0	0
PS-32:1;0(14:1;0-18:0;0)	PS	GPL	MEM	PS	32	1	1	0	0	0	0		0	0	0
PS-32:1;0(16:1;0-16:0;0)	PS	GPL	MEM	PS	32	1	1	0	0	0	0		2.39853	2.15041	2.56136
PS-32:2;0(14:0;0-18:2;0)	PS	GPL	MEM	PS	32	2	2	0	0	0	0		0	0	0
PS-32:2;0(16:1;0-16:1;0)	PS	GPL	MEM	PS	32	2	2	0	0	0	0		0	0	0
PS-33:0;0(15:0;0-18:0;0)	PS	GPL	MEM	PS	33	0	0	0	0	0	0		0	0	0
PS-33:0;0(16:0;0-17:0;0)	PS	GPL	MEM	PS	33	0	0	0	0	0	0		0	0	0
PS-33:1;0(15:0;0-18:1;0)	PS	GPL	MEM	PS	33	1	1	0	0	0	0		0	0	0
PS-33:1;0(15:1;0-18:0;0)	PS	GPL	MEM	PS	33	1	1	0	0	0	0		0	0	0
PS-33:1;0(16:0;0-17:1;0)	PS	GPL	MEM	PS	33	1	1	0	0	0	0		1.33549	1.13453	0
PS-33:1;0(16:1;0-17:0;0)	PS	GPL	MEM	PS	33	1	1	0	0	0	0		0	0	0
PS-33:4;0(14:3;0-19:1;0)	PS	GPL	MEM	PS	33	4	4	0	0	0.748609	0		0	0	0
PS-33:4;0(15:4;0-18:0;0)	PS	GPL	MEM	PS	33	4	4	0	0	0	0.706581		0	0	0
PS-34:0;0(16:0;0-18:0;0)	PS	GPL	MEM	PS	34	0	0	0	0	0	0		3.5656	2.66634	3.74886
PS-34:1;0(16:0;0-18:1;0)	PS	GPL	MEM	PS	34	1	1	0	3.49352	3.36302	2.9194		38.0995	33.6813	40.8291
PS-34:1;0(16:1;0-18:0;0)	PS	GPL	MEM	PS	34	1	1	0	2.90241	2.45996	2.57202		16.2846	14.1333	17.522
PS-34:1;0(17:1;0-17:0;0)	PS	GPL	MEM	PS	34	1	1	0	0	0.396217	0.447843		0	0	0
PS-34:2;0(16:0;0-18:2;0)	PS	GPL	MEM	PS	34	2	2	0	0	0	0		0	0.991639	1.18299
PS-34:2;0(16:1;0-18:1;0)	PS	GPL	MEM	PS	34	2	2	0	0.893762	0.910759	0.901303		3.66907	2.36857	2.69009
PS-34:2;0(16:2;0-18:0;0)	PS	GPL	MEM	PS	34	2	2	0	0	0	0		0	0	0
PS-34:2;0(17:1;0-17:1;0)	PS	GPL	MEM	PS	34	2	2	0	0.051118	0.033961	0.053915		0	0	0.2664
PS-34:3;0(16:0;0-18:3;0)	PS	GPL	MEM	PS	34	3	3	0	0	0	0		0	0	0
PS-34:3;0(16:1;0-18:2;0)	PS	GPL	MEM	PS	34	3	3	0	0	0	0		0	0	0
PS-34:6;0(14:3;0-20:3;0)	PS	GPL	MEM	PS	34	6	6	0	0	0	0		0	0	0
PS-34:7;0(14:3;0-20:4;0)	PS	GPL	MEM	PS	34	7	7	0	0	0	0		0	0	0
PS-35:0;0(17:0;0-18:0;0)	PS	GPL	MEM	PS	35	0	0	0	0	0	0		0	0	0
PS-35:1;0(16:0;0-19:1;0)	PS	GPL	MEM	PS	35	1	1	0	0	0	0		0	0	0
PS-35:1;0(16:1;0-19:0;0)	PS	GPL	MEM	PS	35	1	1	0	0	0	0		0	0	0
PS-35:1;0(17:0;0-18:1;0)	PS	GPL	MEM	PS	35	1	1	0	2.2714	2.09884	2.02757		9.88709	8.05843	9.91132
PS-35:1;0(17:1;0-18:0;0)	PS	GPL	MEM	PS	35	1	1	0	0.378931	0.311192	0.368241		4.29183	3.87671	5.08027
PS-35:2;0(16:1;0-19:1;0)	PS	GPL	MEM	PS	35	2	2	0	0	0	0		0	0	0
PS-35:2;0(17:0;0-18:2;0)	PS	GPL	MEM	PS	35	2	2	0	0.195864	0.13003	0.113201		0	0	0
PS-35:2;0(17:1;0-18:1;0)	PS	GPL	MEM	PS	35	2	2	0	0.447328	0.50622	0.417024		1.7017	1.38919	0
PS-35:5;0(15:0;0-20:5;0)	PS	GPL	MEM	PS	35	5	5	0	0	0	0		0	0	0
PS-36:1;0(16:0;0-20:1;0)	PS	GPL	MEM	PS	36	1	1	0	0	0	0		1.22645	1.13797	0
PS-36:1;0(16:1;0-20:0;0)	PS	GPL	MEM	PS	36	1	1	0	0.176577	0	0		0	0	0
PS-36:1;0(17:0;0-19:1;0)	PS	GPL	MEM	PS	36	1	1	0	0	0	0		0	0	0
PS-36:1;0(18:1;0-18:0;0)	PS	GPL	MEM	PS	36	1	1	0	68.7895	70.52	59.6852		243.85	212.358	266.444
PS-36:2;0(16:0;0-20:2;0)	PS	GPL	MEM	PS	36	2	2	0	0	0	0		0	0	0
PS-36:2;0(16:1;0-20:1;0)	PS	GPL	MEM	PS	36	2	2	0	0	0	0		0	0	0
PS-36:2;0(18:1;0-18:1;0)	PS	GPL	MEM	PS	36	2	2	0	15.29	15.4611	13.7331		45.6218	40.7299	50.3856
PS-36:2;0(18:2;0-18:0;0)	PS	GPL	MEM	PS	36	2	2	0	1.24512	1.44278	1.14759		6.62758	5.39789	7.41021
PS-36:3;0(16:0;0-20:3;0)	PS	GPL	MEM	PS	36	3	3	0	0	0	0		0	2.90852	0
PS-36:3;0(16:1;0-20:2;0)	PS	GPL	MEM	PS	36	3	3	0	0	0	0		0	0	0
PS-36:3;0(18:2;0-18:1;0)	PS	GPL	MEM	PS	36	3	3	0	3.61946	2.6405	3.46004		6.68861	4.26589	6.35355
PS-36:3;0(18:3;0-18:0;0)	PS	GPL	MEM	PS	36	3	3	0	0	0	0		0	0	0
PS-36:4;0(14:3;0-22:1;0)	PS	GPL	MEM	PS	36	4	4	0	0	0	0		0	0	0
PS-36:4;0(16:0;0-20:4;0)	PS	GPL	MEM	PS	36	4	4	0	0	0	0		0	0	0
PS-36:4;0(16:1;0-20:3;0)	PS	GPL	MEM	PS	36	4	4	0	0	0	0		0	0	0
PS-36:4;0(18:2;0-18:2;0)	PS	GPL	MEM	PS	36	4	4	0	0	0	0		0	0	0
PS-36:6;0(14:1;0-22:5;0)	PS	GPL	MEM	PS	36	6	6	0	0	0	0		0	0	0
PS-36:6;0(14:3;0-22:3;0)	PS	GPL	MEM	PS	36	6	6	0	0	0	0		0	0	0
PS-36:8;0(14:3;0-22:5;0)	PS	GPL	MEM	PS	36	8	8	0	0	0	0		0	0	0
PS-37:1;0(16:0;0-21:1;0)	PS	GPL	MEM	PS	37	1	1	0	0	0	0		0	0	0
PS-37:1;0(17:0;0-20:1;0)	PS	GPL	MEM	PS	37	1	1	0	0.164874	0.287338	0.251156		0	0	0
PS-37:1;0(17:1;0-20:0;0)	PS	GPL	MEM	PS	37	1	1	0	0	0	0		0	0	0
PS-37:1;0(18:0;0-19:1;0)	PS	GPL	MEM	PS	37	1	1	0	1.15455	0.976528	0		2.78696	3.02212	3.44991
PS-37:1;0(18:1;0-19:0;0)	PS	GPL	MEM	PS	37	1	1	0	1.13994	1.12619	1.8821		3.3975	2.85883	3.37388
PS-37:2;0(16:0;0-21:2;0)	PS	GPL	MEM	PS	37	2	2	0	0	0	0		0	0	0
PS-37:2;0(16:1;0-21:1;0)	PS	GPL	MEM	PS	37	2	2	0	0	0	0		0	0	0
PS-37:2;0(17:0;0-20:2;0)	PS	GPL	MEM	PS	37	2	2	0	0.257766	0.148037	0.19025		0	0	0
PS-37:2;0(18:0;0-19:2;0)	PS	GPL	MEM	PS	37	2	2	0	0	0	0		0	0	0
PS-37:2;0(18:1;0-19:1;0)	PS	GPL	MEM	PS	37	2	2	0	0.671707	0.738645	0.64367		2.24433	1.86736	2.41591
PS-37:2;0(18:2;0-19:0;0)	PS	GPL	MEM	PS	37	2	2	0	0	0	0		0	0	0
PS-37:3;0(16:0;0-21:3;0)	PS	GPL	MEM	PS	37	3	3	0	0	0	0		0	0	0
PS-37:3;0(17:0;0-20:3;0)	PS	GPL	MEM	PS	37	3	3	0	0	0	0		0	0	0
PS-37:3;0(18:2;0-19:1;0)	PS	GPL	MEM	PS	37	3	3	0	0	0	0		0	0	0
PS-37:4;0(15:0;0-22:4;0)	PS	GPL	MEM	PS	37	4	4	0	0	0	0		0	0	0
PS-37:4;0(17:0;0-20:4;0)	PS	GPL	MEM	PS	37	4	4	0	0	0	0		0	0	0
PS-38:0;0(16:0;0-22:0;0)	PS	GPL	MEM	PS	38	0	0	0	0	0	0		0	0	0
PS-38:0;0(18:0;0-20:0;0)	PS	GPL	MEM	PS	38	0	0	0	1.36436	2.08255	0		0	0	0
PS-38:1;0(16:0;0-22:1;0)	PS	GPL	MEM	PS	38	1	1	0	0	0	0		0	0	0
PS-38:1;0(16:1;0-22:0;0)	PS	GPL	MEM	PS	38	1	1	0	0.16127	0.122284	0		0	0	0
PS-38:1;0(18:0;0-20:1;0)	PS	GPL	MEM	PS	38	1	1	0	1.02155	1.03265	0.900171		3.45026	3.00787	3.86853
PS-38:1;0(18:1;0-20:0;0)	PS	GPL	MEM	PS	38	1	1	0	2.11861	2.16166	1.9961		7.40761	6.52989	7.81532
PS-38:2;0(16:0;0-22:2;0)	PS	GPL	MEM	PS	38	2	2	0	0	0	0		0	0	0
PS-38:2;0(16:1;0-22:1;0)	PS	GPL	MEM	PS	38	2	2	0	0	0	0		0	0	0
PS-38:2;0(18:0;0-20:2;0)	PS	GPL	MEM	PS	38	2	2	0	2.39069	2.60847	2.05366		3.91997	4.05263	5.0885
PS-38:2;0(18:1;0-20:1;0)	PS	GPL	MEM	PS	38	2	2	0	3.21745	3.31173	2.77054		6.44123	5.17917	6.64667
PS-38:2;0(18:2;0-20:0;0)	PS	GPL	MEM	PS	38	2	2	0	0	0	0		0	0	0
PS-38:3;0(16:0;0-22:3;0)	PS	GPL	MEM	PS	38	3	3	0	0	0	0		0	0	0
PS-38:3;0(16:1;0-22:2;0)	PS	GPL	MEM	PS	38	3	3	0	0	0	0		0	0	0
PS-38:3;0(18:0;0-20:3;0)	PS	GPL	MEM	PS	38	3	3	0	0.896457	0.800626	0.624752		8.97776	8.63034	9.82284
PS-38:3;0(18:1;0-20:2;0)	PS	GPL	MEM	PS	38	3	3	0	0.707341	0.763012	0.707227		2.18234	0.826938	2.07552
PS-38:3;0(18:2;0-20:1;0)	PS	GPL	MEM	PS	38	3	3	0	0	0	0		0	0	0
PS-38:4;0(16:0;0-22:4;0)	PS	GPL	MEM	PS	38	4	4	0	0	0	0		0	0	0
PS-38:4;0(16:1;0-22:3;0)	PS	GPL	MEM	PS	38	4	4	0	0	0	0		0	0	0
PS-38:4;0(18:0;0-20:4;0)	PS	GPL	MEM	PS	38	4	4	0	0	0	0		0	0	0
PS-38:4;0(18:1;0-20:3;0)	PS	GPL	MEM	PS	38	4	4	0	0	0	0		0	0	0
PS-38:4;0(18:2;0-20:2;0)	PS	GPL	MEM	PS	38	4	4	0	0	0	0		0	0	0
PS-38:5;0(16:0;0-22:5;0)	PS	GPL	MEM	PS	38	5	5	0	0	0	0		0	0	0
PS-38:5;0(16:1;0-22:4;0)	PS	GPL	MEM	PS	38	5	5	0	0	0	0		0	0	0
PS-38:5;0(18:0;0-20:5;0)	PS	GPL	MEM	PS	38	5	5	0	0	0	0		0	0	0
PS-38:5;0(18:1;0-20:4;0)	PS	GPL	MEM	PS	38	5	5	0	0	0	0		2.14134	1.56536	1.98085
PS-38:5;0(18:2;0-20:3;0)	PS	GPL	MEM	PS	38	5	5	0	0	0	0		0	0	0
PS-38:6;0(16:1;0-22:5;0)	PS	GPL	MEM	PS	38	6	6	0	0	0	0		0	0	0
PS-38:6;0(18:2;0-20:4;0)	PS	GPL	MEM	PS	38	6	6	0	0	0	0		0	0	0
PS-39:1;0(17:1;0-22:0;0)	PS	GPL	MEM	PS	39	1	1	0	0	0	0		0	0	0
PS-39:1;0(18:1;0-21:0;0)	PS	GPL	MEM	PS	39	1	1	0	0.58347	0	0.56294		0	0	0
PS-39:2;0(16:1;0-23:1;0)	PS	GPL	MEM	PS	39	2	2	0	0	0	0		0	0	0
PS-39:2;0(17:1;0-22:1;0)	PS	GPL	MEM	PS	39	2	2	0	0	0	0		0	0	0
PS-39:2;0(18:0;0-21:2;0)	PS	GPL	MEM	PS	39	2	2	0	0	0	0		0	0	0
PS-39:2;0(18:1;0-21:1;0)	PS	GPL	MEM	PS	39	2	2	0	0.252867	0	0		0	0	0
PS-39:3;0(18:0;0-21:3;0)	PS	GPL	MEM	PS	39	3	3	0	0	0	0		0	0	0
PS-39:3;0(18:1;0-21:2;0)	PS	GPL	MEM	PS	39	3	3	0	0	0	0		0	0	0
PS-39:3;0(19:0;0-20:3;0)	PS	GPL	MEM	PS	39	3	3	0	0	0	0		0	0	0
PS-39:4;0(17:0;0-22:4;0)	PS	GPL	MEM	PS	39	4	4	0	0	0	0		0	0	0
PS-39:4;0(19:0;0-20:4;0)	PS	GPL	MEM	PS	39	4	4	0	0	0	0		0	0	0
PS-39:4;0(19:1;0-20:3;0)	PS	GPL	MEM	PS	39	4	4	0	0	0	0		0	0	0
PS-39:5;0(17:0;0-22:5;0)	PS	GPL	MEM	PS	39	5	5	0	0	0	0		0	0	0
PS-39:6;0(17:0;0-22:6;0)	PS	GPL	MEM	PS	39	6	6	0	0	0	0		0	0	0
PS-40:0;0(18:0;0-22:0;0)	PS	GPL	MEM	PS	40	0	0	0	0	7.00769	5.43159		1.21966	1.07098	0
PS-40:1;0(16:0;0-24:1;0)	PS	GPL	MEM	PS	40	1	1	0	0	0	0		0	0	0
PS-40:1;0(16:1;0-24:0;0)	PS	GPL	MEM	PS	40	1	1	0	0	0	0		0	0	0
PS-40:1;0(18:0;0-22:1;0)	PS	GPL	MEM	PS	40	1	1	0	0	0	0		0	0	0
PS-40:1;0(18:1;0-22:0;0)	PS	GPL	MEM	PS	40	1	1	0	3.26023	3.83234	3.20848		8.27629	6.76422	8.61979
PS-40:2;0(16:1;0-24:1;0)	PS	GPL	MEM	PS	40	2	2	0	0	0	0		0	0	0
PS-40:2;0(18:0;0-22:2;0)	PS	GPL	MEM	PS	40	2	2	0	0	0	0		0	0	0
PS-40:2;0(18:1;0-22:1;0)	PS	GPL	MEM	PS	40	2	2	0	2.52581	2.76232	2.25176		6.00895	5.28297	6.55959
PS-40:2;0(18:2;0-22:0;0)	PS	GPL	MEM	PS	40	2	2	0	0	0	0		0	0	0
PS-40:3;0(16:0;0-24:3;0)	PS	GPL	MEM	PS	40	3	3	0	0	0	0		0	0	0
PS-40:3;0(16:1;0-24:2;0)	PS	GPL	MEM	PS	40	3	3	0	0	0	0		0	0	0
PS-40:3;0(18:0;0-22:3;0)	PS	GPL	MEM	PS	40	3	3	0	0	0	0		0	0	0
PS-40:3;0(18:1;0-22:2;0)	PS	GPL	MEM	PS	40	3	3	0	0	0.305693	0		0	0	0
PS-40:3;0(20:3;0-20:0;0)	PS	GPL	MEM	PS	40	3	3	0	0	0	0		0	0	0
PS-40:4;0(16:0;0-24:4;0)	PS	GPL	MEM	PS	40	4	4	0	0	0	0		0	0	0
PS-40:4;0(16:1;0-24:3;0)	PS	GPL	MEM	PS	40	4	4	0	0	0	0		0	0	0
PS-40:4;0(18:0;0-22:4;0)	PS	GPL	MEM	PS	40	4	4	0	0	0	0		0	2.60256	2.88988
PS-40:4;0(18:1;0-22:3;0)	PS	GPL	MEM	PS	40	4	4	0	0	0	0		0	0	0
PS-40:4;0(18:2;0-22:2;0)	PS	GPL	MEM	PS	40	4	4	0	0	0	0		0	0	0
PS-40:4;0(20:2;0-20:2;0)	PS	GPL	MEM	PS	40	4	4	0	0	0	0		0	0	0
PS-40:4;0(20:3;0-20:1;0)	PS	GPL	MEM	PS	40	4	4	0	0	0	0		0	0	0
PS-40:4;0(20:4;0-20:0;0)	PS	GPL	MEM	PS	40	4	4	0	0	0	0		0	0	0
PS-40:5;0(16:0;0-24:5;0)	PS	GPL	MEM	PS	40	5	5	0	0	0	0		0	0	0
PS-40:5;0(18:0;0-22:5;0)	PS	GPL	MEM	PS	40	5	5	0	0	0	0		0	0	0
PS-40:5;0(18:1;0-22:4;0)	PS	GPL	MEM	PS	40	5	5	0	0	0	0		0	0	0
PS-40:5;0(20:4;0-20:1;0)	PS	GPL	MEM	PS	40	5	5	0	0	0	0		0	0	0
PS-40:6;0(18:0;0-22:6;0)	PS	GPL	MEM	PS	40	6	6	0	0	0	0		0	0	0
PS-40:6;0(18:1;0-22:5;0)	PS	GPL	MEM	PS	40	6	6	0	0	0	0		0	0	0
PS-40:6;0(18:2;0-22:4;0)	PS	GPL	MEM	PS	40	6	6	0	0	0	0		0	0	0
PS-40:6;0(20:3;0-20:3;0)	PS	GPL	MEM	PS	40	6	6	0	0	0	0		0	0	0
PS-40:6;0(20:4;0-20:2;0)	PS	GPL	MEM	PS	40	6	6	0	0	0	0		0	0	0
PS-40:7;0(18:1;0-22:6;0)	PS	GPL	MEM	PS	40	7	7	0	0	0	0		0	0	0
PS-40:7;0(20:4;0-20:3;0)	PS	GPL	MEM	PS	40	7	7	0	0	0	0		0	0	0
PS-40:8;0(18:2;0-22:6;0)	PS	GPL	MEM	PS	40	8	8	0	0	0	0		0	0	0
PS-40:8;0(20:4;0-20:4;0)	PS	GPL	MEM	PS	40	8	8	0	0	0	0		0	0	0
PS-41:1;0(18:1;0-23:0;0)	PS	GPL	MEM	PS	41	1	1	0	0	0	0		0	0	0
PS-41:2;0(18:1;0-23:1;0)	PS	GPL	MEM	PS	41	2	2	0	0	0	0		0	0	0
PS-41:3;0(18:1;0-23:2;0)	PS	GPL	MEM	PS	41	3	3	0	0	0	0		0	0	0
PS-41:4;0(19:0;0-22:4;0)	PS	GPL	MEM	PS	41	4	4	0	0	0	0		0	0	0
PS-41:5;0(19:0;0-22:5;0)	PS	GPL	MEM	PS	41	5	5	0	0	0	0		0	0	0
PS-41:6;0(19:0;0-22:6;0)	PS	GPL	MEM	PS	41	6	6	0	0	0	0		0	0	0
PS-42:10;0(20:4;0-22:6;0)	PS	GPL	MEM	PS	42	10	10	0	0	0	0		0	0	0
PS-42:1;0(18:0;0-24:1;0)	PS	GPL	MEM	PS	42	1	1	0	0	0	0		0	0	0
PS-42:1;0(18:1;0-24:0;0)	PS	GPL	MEM	PS	42	1	1	0	1.85903	2.04564	1.64386		4.97186	4.24635	5.25811
PS-42:2;0(18:1;0-24:1;0)	PS	GPL	MEM	PS	42	2	2	0	1.42682	1.67029	1.40701		3.63999	2.80809	3.90608
PS-42:2;0(18:2;0-24:0;0)	PS	GPL	MEM	PS	42	2	2	0	0	0	0		0	0	0
PS-42:3;0(18:1;0-24:2;0)	PS	GPL	MEM	PS	42	3	3	0	0	0	0		0	0	0
PS-42:3;0(18:2;0-24:1;0)	PS	GPL	MEM	PS	42	3	3	0	0	0	0		0	0	0
PS-42:4;0(18:0;0-24:4;0)	PS	GPL	MEM	PS	42	4	4	0	0	0	0		0	0	0
PS-42:4;0(18:1;0-24:3;0)	PS	GPL	MEM	PS	42	4	4	0	0	0	0		0	0	0
PS-42:4;0(20:3;0-22:1;0)	PS	GPL	MEM	PS	42	4	4	0	0	0	0		0	0	0
PS-42:4;0(20:4;0-22:0;0)	PS	GPL	MEM	PS	42	4	4	0	0	0	0		0	0	0
PS-42:5;0(18:0;0-24:5;0)	PS	GPL	MEM	PS	42	5	5	0	0	0	0		0	0	0
PS-42:5;0(18:1;0-24:4;0)	PS	GPL	MEM	PS	42	5	5	0	0	0	0		0	0	0
PS-42:9;0(20:4;0-22:5;0)	PS	GPL	MEM	PS	42	9	9	0	0	0	0		0	0	0
PS-44:4;0(20:4;0-24:0;0)	PS	GPL	MEM	PS	44	4	4	0	0	0	0		0	0	0
PS-44:4;0(22:4;0-22:0;0)	PS	GPL	MEM	PS	44	4	4	0	0	0	0		0	0	0
PS-44:5;0(22:5;0-22:0;0)	PS	GPL	MEM	PS	44	5	5	0	0	0	0		0	0	0
CE-41:1;0(27:1;0-14:0;0)	SE	STE	STO	SE	41	1	1	0	0	0	0		0	0	0
CE-42:1;0(27:1;0-15:0;0)	SE	STE	STO	SE	42	1	1	0	0	0	0		0	0	0
CE-43:1;0(27:1;0-16:0;0)	SE	STE	STO	SE	43	1	1	0	4.64012	8.09213	2.92725		19.5506	16.2599	14.8095
CE-43:2;0(27:1;0-16:1;0)	SE	STE	STO	SE	43	2	2	0	0	0	0		12.553	9.6664	8.43916
CE-44:1;0(27:1;0-17:0;0)	SE	STE	STO	SE	44	1	1	0	0	0	0		0	0	0
CE-44:2;0(27:1;0-17:1;0)	SE	STE	STO	SE	44	2	2	0	0	0	0		0	0	0
CE-45:1;0(27:1;0-18:0;0)	SE	STE	STO	SE	45	1	1	0	0	0	0		0	0	0
CE-45:2;0(27:1;0-18:1;0)	SE	STE	STO	SE	45	2	2	0	25.7413	44.4466	20.686		42.3368	32.4767	31.7547
CE-45:3;0(27:1;0-18:2;0)	SE	STE	STO	SE	45	3	3	0	0	0	0		14.5967	11.9606	8.13598
CE-45:4;0(27:1;0-18:3;0)	SE	STE	STO	SE	45	4	4	0	0	0	0		0	0	0
CE-46:2;0(27:1;0-19:1;0)	SE	STE	STO	SE	46	2	2	0	0	0	0		0	0	0
CE-47:2;0(27:1;0-20:1;0)	SE	STE	STO	SE	47	2	2	0	4.24351	6.05789	3.06936		0	0	0
CE-47:3;0(27:1;0-20:2;0)	SE	STE	STO	SE	47	3	3	0	0	0	0		0	0	0
CE-47:4;0(27:1;0-20:3;0)	SE	STE	STO	SE	47	4	4	0	0	0	0		0	0	0
CE-47:6;0(27:1;0-20:5;0)	SE	STE	STO	SE	47	6	6	0	0	0	0		0	0	0
CE-49:5;0(27:1;0-22:4;0)	SE	STE	STO	SE	49	5	5	0	0	0	0		0	0	0
CE-49:6;0(27:1;0-22:5;0)	SE	STE	STO	SE	49	6	6	0	0	0	0		0	0	0
CE-49:7;0(27:1;0-22:6;0)	SE	STE	STO	SE	49	7	7	0	0	0	0		0	0	0
CE-51:2;0(27:1;0-24:1;0)	SE	STE	STO	SE	51	2	2	0	0	0	0		0	0	0
CE-51:6;0(27:1;0-24:5;0)	SE	STE	STO	SE	51	6	6	0	0	0	0		0	0	0
CE-51:7;0(27:1;0-24:6;0)	SE	STE	STO	SE	51	7	7	0	0	0	0		0	0	0
SM-32:0;2	SM	SL	MEM	SM	32	0	0	2	0	0	0		0.480908	0.422978	0.656318
SM-32:1;2	SM	SL	MEM	SM	32	1	0	2	0.964645	0.947677	0.838484		3.63609	2.98004	4.01467
SM-32:2;2	SM	SL	MEM	SM	32	2	1	2	0	0	0		0	0	0
SM-32:2;4	SM	SL	MEM	SM	32	2	1	4	0	0	0		0	0	0.426371
SM-34:0;2	SM	SL	MEM	SM	34	0	0	2	0	0	0		15.5073	11.2831	16.9604
SM-34:0;3	SM	SL	MEM	SM	34	0	0	3	0	0	0		0.523467	0.617526	0.820835
SM-34:0;4	SM	SL	MEM	SM	34	0	0	4	0	0	0		0	0	0
SM-34:1;2	SM	SL	MEM	SM	34	1	0	2	42.0531	40.3672	35.0511		178.809	153.954	193.632
SM-34:1;3	SM	SL	MEM	SM	34	1	0	3	0	0	0		0	0	0
SM-34:1;4	SM	SL	MEM	SM	34	1	0	4	0.441897	0.641033	0.608705		0	0	0
SM-34:2;2	SM	SL	MEM	SM	34	2	1	2	0.567135	0.666075	0.434882		3.45188	2.90414	3.63511
SM-34:2;4	SM	SL	MEM	SM	34	2	1	4	0.412908	0.634501	0.404436		3.0485	2.57022	3.43521
SM-36:0;2	SM	SL	MEM	SM	36	0	0	2	0	0	0		0	0	0
SM-36:0;3	SM	SL	MEM	SM	36	0	0	3	1.24663	1.13117	1.02278		1.0415	0.926724	1.3036
SM-36:0;4	SM	SL	MEM	SM	36	0	0	4	0	0	0		0	0	0
SM-36:1;2	SM	SL	MEM	SM	36	1	0	2	3.52693	3.72948	3.31944		13.9843	12.3672	16.2021
SM-36:1;4	SM	SL	MEM	SM	36	1	0	4	3.78464	4.11134	3.45733		3.15124	3.05711	3.20207
SM-36:2;2	SM	SL	MEM	SM	36	2	1	2	0	0	0		1.13957	0.845949	1.186
SM-36:2;4	SM	SL	MEM	SM	36	2	1	4	0	0	0		0	0	0
SM-38:0;2	SM	SL	MEM	SM	38	0	0	2	0	0	0		0	0	0
SM-38:0;3	SM	SL	MEM	SM	38	0	0	3	0.510433	0.567203	0		0	0	0
SM-38:1;2	SM	SL	MEM	SM	38	1	0	2	2.87405	2.87037	2.50051		13.2211	11.3365	15.1014
SM-38:1;3	SM	SL	MEM	SM	38	1	0	3	0	0.526386	0.749037		0	0	0
SM-38:1;4	SM	SL	MEM	SM	38	1	0	4	0.465102	0.399719	0.497657		0	0	0.502853
SM-38:2;2	SM	SL	MEM	SM	38	2	1	2	0	0	0		1.24382	1.14841	1.50872
SM-38:2;4	SM	SL	MEM	SM	38	2	1	4	2.41845	2.51699	2.21302		1.9323	1.88182	2.12693
SM-40:0;3	SM	SL	MEM	SM	40	0	0	3	0	0	0		0	0	0
SM-40:1;2	SM	SL	MEM	SM	40	1	0	2	4.82481	4.62466	3.87213		28.4447	24.0719	30.2075
SM-40:1;3	SM	SL	MEM	SM	40	1	0	3	0	0	0		0	0	0
SM-40:2;2	SM	SL	MEM	SM	40	2	1	2	1.13636	1.16044	0.95894		4.91513	4.24977	5.38098
SM-42:0;3	SM	SL	MEM	SM	42	0	0	3	0	0	0		0	0	0
SM-42:1;2	SM	SL	MEM	SM	42	1	0	2	8.64746	8.71582	6.9177		61.5405	51.0099	65.8231
SM-42:1;3	SM	SL	MEM	SM	42	1	0	3	0	0	0		2.91193	2.54521	2.9185
SM-42:2;2	SM	SL	MEM	SM	42	2	1	2	17.6895	17.3016	15.1805		93.2974	78.8272	98.1768
SM-42:2;3	SM	SL	MEM	SM	42	2	1	3	0	0	0		0	0	0
SM-44:1;3	SM	SL	MEM	SM	44	1	0	3	0	0	0		0	0	0
SM-44:2;2	SM	SL	MEM	SM	44	2	1	2	0.817809	0.844873	0		2.16167	3.67538	2.56929
chol	ST	ST	MEM	ST	27	1	1	1	318.411	311.55	255.771		1621.62	1352.23	1833.52
TAG-34:0;0	TAG	GL	STO	TAG	34	0	0	0	18.8206	0	0		0	0	0
TAG-36:0;0	TAG	GL	STO	TAG	36	0	0	0	77.6367	0	0		0	0	0
TAG-38:0;0	TAG	GL	STO	TAG	38	0	0	0	60.9642	4.68042	0		0	0	1.35371
TAG-40:0;0	TAG	GL	STO	TAG	40	0	0	0	41.3925	0	0		0	0	0
TAG-40:1;0	TAG	GL	STO	TAG	40	1	1	0	5.20635	0	0		0	0	0
TAG-42:0;0	TAG	GL	STO	TAG	42	0	0	0	16.8227	0	0		0	0	0
TAG-42:1;0	TAG	GL	STO	TAG	42	1	1	0	8.01343	0	0		0	0	0
TAG-42:2;0	TAG	GL	STO	TAG	42	2	2	0	0	0	0		0	0	0
TAG-42:3;0	TAG	GL	STO	TAG	42	3	3	0	0	0	0		0	0	0
TAG-43:0;0	TAG	GL	STO	TAG	43	0	0	0	0	0	0		0	0	0
TAG-44:0;0	TAG	GL	STO	TAG	44	0	0	0	5.0253	0	0		0	0	0
TAG-44:1;0	TAG	GL	STO	TAG	44	1	1	0	6.06555	0	0		0	0	0
TAG-44:2;0	TAG	GL	STO	TAG	44	2	2	0	0	0	0		0	0	0
TAG-44:3;0	TAG	GL	STO	TAG	44	3	3	0	0	0	0		0	0	0
TAG-45:1;0	TAG	GL	STO	TAG	45	1	1	0	0	0	0		0	0	0
TAG-45:2;0	TAG	GL	STO	TAG	45	2	2	0	0	0	0		0	0	0
TAG-46:0;0	TAG	GL	STO	TAG	46	0	0	0	1.89242	0	0		0	0	0
TAG-46:1;0	TAG	GL	STO	TAG	46	1	1	0	9.06751	2.2909	2.81761		2.98155	2.37061	2.9822
TAG-46:2;0	TAG	GL	STO	TAG	46	2	2	0	1.75745	0	0		0	0	0
TAG-46:3;0	TAG	GL	STO	TAG	46	3	3	0	0	0	0		0	0	0
TAG-47:1;0	TAG	GL	STO	TAG	47	1	1	0	0	0	0		0	0	0
TAG-47:2;0	TAG	GL	STO	TAG	47	2	2	0	0	0	0		0	0	0
TAG-47:3;0	TAG	GL	STO	TAG	47	3	3	0	0	0	0		0	0	0
TAG-48:0;0	TAG	GL	STO	TAG	48	0	0	0	4.46215	2.75483	0		0	0	4.11615
TAG-48:1;0	TAG	GL	STO	TAG	48	1	1	0	9.02593	5.29719	4.96895		2.49141	5.36585	2.51152
TAG-48:2;0	TAG	GL	STO	TAG	48	2	2	0	6.44333	2.74698	2.04362		1.3694	4.32369	0
TAG-48:3;0	TAG	GL	STO	TAG	48	3	3	0	0	0	0		0	0	0
TAG-48:4;0	TAG	GL	STO	TAG	48	4	4	0	0	0	0		0	0	0
TAG-49:1;0	TAG	GL	STO	TAG	49	1	1	0	3.97021	2.73102	3.17882		0	0	0
TAG-49:2;0	TAG	GL	STO	TAG	49	2	2	0	0	0	0		0	0	0
TAG-49:3;0	TAG	GL	STO	TAG	49	3	3	0	0	0	0		0	0	0
TAG-50:0;0	TAG	GL	STO	TAG	50	0	0	0	0	0	0		0	0	0
TAG-50:1;0	TAG	GL	STO	TAG	50	1	1	0	28.2193	15.1983	14.3445		5.3389	17.2912	6.18182
TAG-50:2;0	TAG	GL	STO	TAG	50	2	2	0	23.5362	17.1359	14.7504		5.19295	30.9285	4.83718
TAG-50:3;0	TAG	GL	STO	TAG	50	3	3	0	3.2541	2.00037	2.13817		0	14.6847	0
TAG-50:4;0	TAG	GL	STO	TAG	50	4	4	0	0	0	0		0	0	0
TAG-50:5;0	TAG	GL	STO	TAG	50	5	5	0	0	0	0		0	0	0
TAG-51:1;0	TAG	GL	STO	TAG	51	1	1	0	2.96208	0	2.36021		0	0	0
TAG-51:2;0	TAG	GL	STO	TAG	51	2	2	0	6.08198	4.76318	4.15086		0	1.88656	0
TAG-51:3;0	TAG	GL	STO	TAG	51	3	3	0	0	0	0		0	0	0
TAG-51:4;0	TAG	GL	STO	TAG	51	4	4	0	0	0	0		0	0	0
TAG-52:1;0	TAG	GL	STO	TAG	52	1	1	0	5.54727	1.48499	0		2.21676	0	2.36658
TAG-52:2;0	TAG	GL	STO	TAG	52	2	2	0	80.3402	59.4713	53.9128		14.6899	61.5441	14.6317
TAG-52:3;0	TAG	GL	STO	TAG	52	3	3	0	24.1526	15.8163	15.2722		4.85805	82.1725	4.22785
TAG-52:4;0	TAG	GL	STO	TAG	52	4	4	0	0	0	0		0	29.4816	0
TAG-52:5;0	TAG	GL	STO	TAG	52	5	5	0	0	0	0		0	10.2995	0
TAG-52:6;0	TAG	GL	STO	TAG	52	6	6	0	0	0	0		0	0	0
TAG-53:1;0	TAG	GL	STO	TAG	53	1	1	0	0	0	0		0	0	0
TAG-53:2;0	TAG	GL	STO	TAG	53	2	2	0	7.95551	6.99128	6.56816		2.052	2.55658	1.61801
TAG-53:3;0	TAG	GL	STO	TAG	53	3	3	0	4.4907	3.68229	0		0	0	0
TAG-53:4;0	TAG	GL	STO	TAG	53	4	4	0	0	0	0		0	0	0
TAG-54:1;0	TAG	GL	STO	TAG	54	1	1	0	0	0	0		0	0	0
TAG-54:2;0	TAG	GL	STO	TAG	54	2	2	0	19.4496	0	14.805		5.70934	2.37913	6.60452
TAG-54:3;0	TAG	GL	STO	TAG	54	3	3	0	82.5316	62.0881	52.8301		13.6586	62.1141	12.9171
TAG-54:4;0	TAG	GL	STO	TAG	54	4	4	0	10.3804	4.29557	3.38685		1.4451	63.0091	1.85507
TAG-54:5;0	TAG	GL	STO	TAG	54	5	5	0	2.99419	0	0		0	23.964	0
TAG-54:6;0	TAG	GL	STO	TAG	54	6	6	0	0	0	0		0	4.27657	0
TAG-54:7;0	TAG	GL	STO	TAG	54	7	7	0	0	0	0		0	0	0
TAG-54:8;0	TAG	GL	STO	TAG	54	8	8	0	0	0	0		0	0	0
TAG-55:1;0	TAG	GL	STO	TAG	55	1	1	0	0	0	0		0	0	0
TAG-55:2;0	TAG	GL	STO	TAG	55	2	2	0	1.88498	0	1.3697		0	0	0
TAG-55:3;0	TAG	GL	STO	TAG	55	3	3	0	3.97982	3.01594	2.92205		0	0	0
TAG-55:4;0	TAG	GL	STO	TAG	55	4	4	0	0	0	0		0	0	0
TAG-55:5;0	TAG	GL	STO	TAG	55	5	5	0	0	0	0		0	0	0
TAG-55:7;0	TAG	GL	STO	TAG	55	7	7	0	7.26675	0	0		0	0	0
TAG-56:1;0	TAG	GL	STO	TAG	56	1	1	0	0	0	0		0	0	0
TAG-56:2;0	TAG	GL	STO	TAG	56	2	2	0	0	0	0		0	0	0
TAG-56:3;0	TAG	GL	STO	TAG	56	3	3	0	16.1686	14.3434	13.1581		3.64989	3.94849	3.17708
TAG-56:4;0	TAG	GL	STO	TAG	56	4	4	0	7.00521	6.09716	5.61833		0	3.32839	0
TAG-56:5;0	TAG	GL	STO	TAG	56	5	5	0	0	0	0		0	2.16168	0
TAG-56:6;0	TAG	GL	STO	TAG	56	6	6	0	0	0	0		0	1.8864	0
TAG-56:7;0	TAG	GL	STO	TAG	56	7	7	0	0	0	0		0	0	0
TAG-56:8;0	TAG	GL	STO	TAG	56	8	8	0	0	0	0		0	0	0
TAG-57:2;0	TAG	GL	STO	TAG	57	2	2	0	0	0	0		0	0	0
TAG-57:5;0	TAG	GL	STO	TAG	57	5	5	0	0	0	0		0	0	0
TAG-57:6;0	TAG	GL	STO	TAG	57	6	6	0	0	0	0		0	0	0
TAG-58:10;0	TAG	GL	STO	TAG	58	10	10	0	0	0	0		0	0	0
TAG-58:1;0	TAG	GL	STO	TAG	58	1	1	0	0	0	0		0	0	0
TAG-58:2;0	TAG	GL	STO	TAG	58	2	2	0	0	0	0		0	0	0
TAG-58:3;0	TAG	GL	STO	TAG	58	3	3	0	3.81912	2.98379	2.04008		0	0	0
TAG-58:4;0	TAG	GL	STO	TAG	58	4	4	0	0	0	0		0	0	0
TAG-58:5;0	TAG	GL	STO	TAG	58	5	5	0	0	0	0		0	0	0
TAG-58:6;0	TAG	GL	STO	TAG	58	6	6	0	0	0	0		0	0	0
TAG-58:7;0	TAG	GL	STO	TAG	58	7	7	0	0	0	0		0	0	0
TAG-58:8;0	TAG	GL	STO	TAG	58	8	8	0	0	0	0		0	0	0
TAG-60:1;0	TAG	GL	STO	TAG	60	1	1	0	0	0	0		0	0	0
TAG-60:2;0	TAG	GL	STO	TAG	60	2	2	0	1.542	0	0		0	0	0
TAG-60:3;0	TAG	GL	STO	TAG	60	3	3	0	1.69122	0	0		0	0	0
TAG-60:4;0	TAG	GL	STO	TAG	60	4	4	0	0	0	0		0	0	0
TAG-60:6;0	TAG	GL	STO	TAG	60	6	6	0	0	0	0		0	0	0
TAG-60:8;0	TAG	GL	STO	TAG	60	8	8	0	0	0	0		0	0	0

## Sheet: CHO - 20171019
feature	class	structuralcategory	functionalcategory	totallength	totaldb	dbcorr	totaloh	CHO1a	CHO3
								CHO1a	CHO3
								WTCHO	WTCHO
pM lipids
Chol	Chol	ST	MEM	27	1	1	0	237.206	634.307
CE 16:0;0	CE	STE	STO	16	0	0	0	NA	NA
CE 18:0;0	CE	STE	STO	18	0	0	0	NA	NA
CE 18:1;0	CE	STE	STO	18	1	1	0	26.6466	38.1382
CE 18:2;0	CE	STE	STO	18	2	2	0	NA	NA
CE 18:3;0	CE	STE	STO	18	3	3	0	NA	NA
CE 20:1;0	CE	STE	STO	20	1	1	0	NA	4.66394
CE 20:2;0	CE	STE	STO	20	2	2	0	NA	NA
CE 20:3;0	CE	STE	STO	20	3	3	0	NA	NA
CE 20:4;0	CE	STE	STO	20	4	4	0	NA	NA
CE 21:0;0	CE	STE	STO	21	0	0	0	NA	NA
CE 22:0;0	CE	STE	STO	22	0	0	0	NA	NA
CE 22:1;0	CE	STE	STO	22	1	1	0	NA	NA
CE 22:4;0	CE	STE	STO	22	4	4	0	NA	NA
CE 22:5;0	CE	STE	STO	22	5	5	0	NA	NA
CE 22:6;0	CE	STE	STO	22	6	6	0	NA	NA
CE 23:0;0	CE	STE	STO	23	0	0	0	NA	NA
CE 24:0;0	CE	STE	STO	24	0	0	0	NA	NA
CE 24:1;0	CE	STE	STO	24	1	1	0	1.9415	NA
Cer 32:0;1	Cer	SL	MEM	32	0	0	1	NA	NA
Cer 32:0;2	Cer	SL	MEM	32	0	0	2	NA	NA
Cer 32:1;1	Cer	SL	MEM	32	1	0	1	0.0737985	NA
Cer 32:1;2	Cer	SL	MEM	32	1	0	2	0.201508	0.230092
Cer 32:1;3	Cer	SL	MEM	32	1	0	3	0.107313	NA
Cer 32:2;2	Cer	SL	MEM	32	2	1	2	0.0653746	NA
Cer 34:0;1	Cer	SL	MEM	34	0	0	1	0.108862	NA
Cer 34:0;2	Cer	SL	MEM	34	0	0	2	0.149603	0.190046
Cer 34:0;3	Cer	SL	MEM	34	0	0	3	0.176357	NA
Cer 34:0;4	Cer	SL	MEM	34	0	0	4	0.0910115	NA
Cer 34:1;1	Cer	SL	MEM	34	1	0	1	NA	NA
Cer 34:1;2	Cer	SL	MEM	34	1	0	2	NA	NA
Cer 34:1;4	Cer	SL	MEM	34	1	0	4	NA	NA
Cer 34:2;2	Cer	SL	MEM	34	2	1	2	0.172672	0.288661
Cer 36:0;1	Cer	SL	MEM	36	0	0	1	NA	NA
Cer 36:0;2	Cer	SL	MEM	36	0	0	2	0.0883163	NA
Cer 36:1;2	Cer	SL	MEM	36	1	0	2	NA	NA
Cer 36:2;2	Cer	SL	MEM	36	2	1	2	0.0750862	0.0959954
Cer 36:2;3	Cer	SL	MEM	36	2	1	3	NA	NA
Cer 38:0;1	Cer	SL	MEM	38	0	0	1	NA	NA
Cer 38:0;2	Cer	SL	MEM	38	0	0	2	0.160424	NA
Cer 38:0;4	Cer	SL	MEM	38	0	0	4	NA	NA
Cer 38:1;2	Cer	SL	MEM	38	1	0	2	NA	NA
Cer 38:2;2	Cer	SL	MEM	38	2	1	2	NA	NA
Cer 38:2;3	Cer	SL	MEM	38	2	1	3	NA	NA
Cer 40:0;1	Cer	SL	MEM	40	0	0	1	NA	NA
Cer 40:0;2	Cer	SL	MEM	40	0	0	2	0.189285	NA
Cer 40:0;3	Cer	SL	MEM	40	0	0	3	0.112041	NA
Cer 40:0;4	Cer	SL	MEM	40	0	0	4	NA	NA
Cer 40:1;2	Cer	SL	MEM	40	1	0	2	0.352427	0.727901
Cer 40:1;3	Cer	SL	MEM	40	1	0	3	0.156714	NA
Cer 40:2;2	Cer	SL	MEM	40	2	1	2	NA	NA
Cer 42:0;1	Cer	SL	MEM	42	0	0	1	NA	NA
Cer 42:0;2	Cer	SL	MEM	42	0	0	2	0.247489	NA
Cer 42:0;3	Cer	SL	MEM	42	0	0	3	0.291588	NA
Cer 42:0;4	Cer	SL	MEM	42	0	0	4	0.165429	NA
Cer 42:1;1	Cer	SL	MEM	42	1	0	1	NA	NA
Cer 42:1;2	Cer	SL	MEM	42	1	0	2	1.0849	1.96497
Cer 42:1;3	Cer	SL	MEM	42	1	0	3	0.340398	NA
Cer 42:1;4	Cer	SL	MEM	42	1	0	4	0.213366	NA
Cer 42:2;2	Cer	SL	MEM	42	2	1	2	1.77634	5.12788
Cer 42:2;3	Cer	SL	MEM	42	2	1	3	NA	NA
Cer 44:0;2	Cer	SL	MEM	44	0	0	2	0.250945	NA
Cer 44:0;3	Cer	SL	MEM	44	0	0	3	0.293729	NA
Cer 44:0;4	Cer	SL	MEM	44	0	0	4	0.162172	NA
Cer 44:1;2	Cer	SL	MEM	44	1	0	2	0.31015	NA
Cer 44:1;3	Cer	SL	MEM	44	1	0	3	0.320175	NA
Cer 44:1;4	Cer	SL	MEM	44	1	0	4	0.19714	NA
Cer 44:2;2	Cer	SL	MEM	44	2	1	2	NA	NA
CL 66:2;0	CL	GPL	MEM	66	2	2	0	NA	NA
CL 66:3;0	CL	GPL	MEM	66	3	3	0	NA	NA
CL 66:4;0	CL	GPL	MEM	66	4	4	0	NA	NA
CL 68:2;0	CL	GPL	MEM	68	2	2	0	NA	NA
CL 68:4;0	CL	GPL	MEM	68	4	4	0	NA	0.436153
CL 68:5;0	CL	GPL	MEM	68	5	5	0	NA	NA
CL 70:4;0	CL	GPL	MEM	70	4	4	0	0.784836	2.46297
CL 70:5;0	CL	GPL	MEM	70	5	5	0	0.858231	1.8149
CL 70:6;0	CL	GPL	MEM	70	6	6	0	NA	NA
CL 72:0;0	CL	GPL	MEM	72	0	0	0	NA	NA
CL 72:4;0	CL	GPL	MEM	72	4	4	0	0.598994	0.694481
CL 72:5;0	CL	GPL	MEM	72	5	5	0	1.82083	4.06828
CL 72:6;0	CL	GPL	MEM	72	6	6	0	1.23667	3.23791
CL 72:7;0	CL	GPL	MEM	72	7	7	0	NA	0.654111
CL 72:8;0	CL	GPL	MEM	72	8	8	0	NA	NA
CL 74:5;0	CL	GPL	MEM	74	5	5	0	NA	NA
CL 74:6;0	CL	GPL	MEM	74	6	6	0	NA	NA
CL 74:7;0	CL	GPL	MEM	74	7	7	0	NA	NA
CL 74:8;0	CL	GPL	MEM	74	8	8	0	NA	NA
CL 74:9;0	CL	GPL	MEM	74	9	9	0	NA	NA
CL 88:23;0	CL	GPL	MEM	88	23	23	0	NA	NA
DAG 12:0;0-18:0;0	DAG	GL	MEM	30	0	0	0	NA	NA
DAG 14:0;0-17:0;0	DAG	GL	MEM	31	0	0	0	NA	NA
DAG 14:0;0-18:1;0	DAG	GL	MEM	32	1	1	0	NA	NA
DAG 14:0;0-20:1;0	DAG	GL	MEM	34	1	1	0	NA	NA
DAG 14:0;0-20:2;0	DAG	GL	MEM	34	2	2	0	NA	NA
DAG 14:0;0-20:3;0	DAG	GL	MEM	34	3	3	0	NA	NA
DAG 14:0;0-22:4;0	DAG	GL	MEM	36	4	4	0	NA	NA
DAG 15:0;0-17:0;0	DAG	GL	MEM	32	0	0	0	NA	NA
DAG 16:0;0-18:1;0	DAG	GL	MEM	34	1	1	0	NA	NA
DAG 16:0;0-18:2;0	DAG	GL	MEM	34	2	2	0	NA	NA
DAG 16:0;0-19:1;0	DAG	GL	MEM	35	1	1	0	NA	NA
DAG 16:0;0-20:1;0	DAG	GL	MEM	36	1	1	0	NA	NA
DAG 16:0;0-20:2;0	DAG	GL	MEM	36	2	2	0	NA	NA
DAG 16:0;0-20:3;0	DAG	GL	MEM	36	3	3	0	NA	NA
DAG 16:0;0-20:4;0	DAG	GL	MEM	36	4	4	0	NA	NA
DAG 16:0;0-22:4;0	DAG	GL	MEM	38	4	4	0	NA	NA
DAG 16:0;0-22:5;0	DAG	GL	MEM	38	5	5	0	NA	NA
DAG 16:0;0-22:6;0	DAG	GL	MEM	38	6	6	0	NA	NA
DAG 16:0;0-24:4;0	DAG	GL	MEM	40	4	4	0	NA	NA
DAG 16:1;0-20:1;0	DAG	GL	MEM	36	2	2	0	NA	NA
DAG 16:1;0-20:2;0	DAG	GL	MEM	36	3	3	0	NA	NA
DAG 16:1;0-20:3;0	DAG	GL	MEM	36	4	4	0	NA	NA
DAG 16:1;0-22:4;0	DAG	GL	MEM	38	5	5	0	NA	NA
DAG 16:1;0-22:5;0	DAG	GL	MEM	38	6	6	0	NA	NA
DAG 17:1;0-18:0;0	DAG	GL	MEM	35	1	1	0	NA	NA
DAG 18:0;0-18:1;0	DAG	GL	MEM	36	1	1	0	NA	NA
DAG 18:0;0-18:2;0	DAG	GL	MEM	36	2	2	0	NA	0.26169
DAG 18:0;0-20:3;0	DAG	GL	MEM	38	3	3	0	NA	NA
DAG 18:0;0-20:4;0	DAG	GL	MEM	38	4	4	0	NA	NA
DAG 18:0;0-22:4;0	DAG	GL	MEM	40	4	4	0	NA	NA
DAG 18:0;0-22:5;0	DAG	GL	MEM	40	5	5	0	NA	NA
DAG 18:0;0-22:6;0	DAG	GL	MEM	40	6	6	0	NA	NA
DAG 18:1;0-18:1;0	DAG	GL	MEM	36	2	2	0	NA	2.82142
DAG 18:1;0-18:2;0	DAG	GL	MEM	36	3	3	0	NA	NA
DAG 18:1;0-19:1;0	DAG	GL	MEM	37	2	2	0	NA	NA
DAG 18:1;0-20:1;0	DAG	GL	MEM	38	2	2	0	NA	1.02794
DAG 18:1;0-20:3;0	DAG	GL	MEM	38	4	4	0	NA	NA
DAG 18:1;0-20:4;0	DAG	GL	MEM	38	5	5	0	NA	NA
DAG 18:1;0-22:3;0	DAG	GL	MEM	40	4	4	0	NA	NA
DAG 18:1;0-22:4;0	DAG	GL	MEM	40	5	5	0	NA	NA
DAG 18:1;0-22:5;0	DAG	GL	MEM	40	6	6	0	NA	NA
DAG 18:2;0-18:2;0	DAG	GL	MEM	36	4	4	0	NA	NA
DAG 18:2;0-20:2;0	DAG	GL	MEM	38	4	4	0	NA	NA
DAG 18:2;0-20:3;0	DAG	GL	MEM	38	5	5	0	NA	NA
DAG 18:2;0-20:4;0	DAG	GL	MEM	38	6	6	0	NA	NA
DAG 18:2;0-22:4;0	DAG	GL	MEM	40	6	6	0	NA	NA
DAG 20:3;0-20:3;0	DAG	GL	MEM	40	6	6	0	NA	NA
HexCer 30:1;3	HexCer	SL	MEM	30	1	0	3	NA	NA
HexCer 30:2;2	HexCer	SL	MEM	30	2	1	2	NA	NA
HexCer 34:0;2	HexCer	SL	MEM	34	0	0	2	NA	NA
HexCer 34:1;2	HexCer	SL	MEM	34	1	0	2	1.19093	2.92459
HexCer 36:0;2	HexCer	SL	MEM	36	0	0	2	NA	NA
HexCer 36:1;2	HexCer	SL	MEM	36	1	0	2	NA	NA
HexCer 38:0;2	HexCer	SL	MEM	38	0	0	2	NA	NA
HexCer 38:1;2	HexCer	SL	MEM	38	1	0	2	NA	NA
HexCer 38:2;2	HexCer	SL	MEM	38	2	1	2	NA	NA
HexCer 40:0;2	HexCer	SL	MEM	40	0	0	2	NA	NA
HexCer 40:1;2	HexCer	SL	MEM	40	1	0	2	0.199641	0.698797
HexCer 42:0;2	HexCer	SL	MEM	42	0	0	2	NA	NA
HexCer 42:1;2	HexCer	SL	MEM	42	1	0	2	NA	NA
HexCer 42:2;2	HexCer	SL	MEM	42	2	1	2	0.935675	2.27505
LPA 16:0;0	LPA	GPL	LYS	16	0	0	0	NA	NA
LPA 16:1;0	LPA	GPL	LYS	16	1	1	0	NA	NA
LPA 16:2;0	LPA	GPL	LYS	16	2	2	0	NA	NA
LPA 18:0;0	LPA	GPL	LYS	18	0	0	0	NA	NA
LPA 18:1;0	LPA	GPL	LYS	18	1	1	0	NA	NA
LPA 18:2;0	LPA	GPL	LYS	18	2	2	0	NA	NA
LPA 20:0;0	LPA	GPL	LYS	20	0	0	0	NA	NA
LPA 20:1;0	LPA	GPL	LYS	20	1	1	0	NA	NA
LPA 24:3;0	LPA	GPL	LYS	24	3	3	0	NA	NA
LPC 16:0;0	LPC	GPL	LYS	16	0	0	0	1.88918	3.50522
LPC 16:1;0	LPC	GPL	LYS	16	1	1	0	0.588973	0.69523
LPC 18:0;0	LPC	GPL	LYS	18	0	0	0	0.528069	1.3271
LPC 18:1;0	LPC	GPL	LYS	18	1	1	0	1.83719	3.15045
LPC 18:2;0	LPC	GPL	LYS	18	2	2	0	NA	NA
LPC 20:0;0	LPC	GPL	LYS	20	0	0	0	NA	NA
LPC 20:1;0	LPC	GPL	LYS	20	1	1	0	NA	NA
LPC 22:6;0	LPC	GPL	LYS	22	6	6	0	NA	NA
LPC O- 16:0;0	LPC O-	GPL	LYS	16	0	0	0	NA	1.00427
LPC O- 16:1;0	LPC O-	GPL	LYS	16	1	1	0	NA	NA
LPC O- 16:2;0	LPC O-	GPL	LYS	16	2	2	0	NA	NA
LPC O- 18:0;0	LPC O-	GPL	LYS	18	0	0	0	NA	NA
LPC O- 18:1;0	LPC O-	GPL	LYS	18	1	1	0	0.824346	1.61568
LPC O- 18:2;0	LPC O-	GPL	LYS	18	2	2	0	NA	NA
LPE 14:1;0	LPE	GPL	LYS	14	1	1	0	0.615139	NA
LPE 16:0;0	LPE	GPL	LYS	16	0	0	0	0.135936	0.320915
LPE 18:0;0	LPE	GPL	LYS	18	0	0	0	0.545199	1.00465
LPE 18:1;0	LPE	GPL	LYS	18	1	1	0	0.648564	1.16383
LPE 18:2;0	LPE	GPL	LYS	18	2	2	0	NA	NA
LPE 20:0;0	LPE	GPL	LYS	20	0	0	0	NA	NA
LPE 20:1;0	LPE	GPL	LYS	20	1	1	0	NA	NA
LPE 20:2;0	LPE	GPL	LYS	20	2	2	0	NA	NA
LPE 20:3;0	LPE	GPL	LYS	20	3	3	0	NA	NA
LPE 20:4;0	LPE	GPL	LYS	20	4	4	0	NA	0.195758
LPE 20:5;0	LPE	GPL	LYS	20	5	5	0	NA	NA
LPE 22:2;0	LPE	GPL	LYS	22	2	2	0	NA	NA
LPE 22:3;0	LPE	GPL	LYS	22	3	3	0	NA	NA
LPE 24:4;0	LPE	GPL	LYS	24	4	4	0	NA	NA
LPE O- 16:0;0	LPE O-	GPL	LYS	16	0	0	0	NA	NA
LPE O- 16:1;0	LPE O-	GPL	LYS	16	1	1	0	0.549634	0.737264
LPE O- 18:0;0	LPE O-	GPL	LYS	18	0	0	0	NA	NA
LPE O- 18:1;0	LPE O-	GPL	LYS	18	1	1	0	0.20039	0.381852
LPG 16:1;0	LPG	GPL	LYS	16	1	1	0	0.0320869	0.0286968
LPG 18:0;0	LPG	GPL	LYS	18	0	0	0	NA	NA
LPG 18:1;0	LPG	GPL	LYS	18	1	1	0	0.37197	0.468958
LPG 18:2;0	LPG	GPL	LYS	18	2	2	0	0.0325564	0.0411631
LPG 20:3;0	LPG	GPL	LYS	20	3	3	0	NA	NA
LPG 20:4;0	LPG	GPL	LYS	20	4	4	0	NA	NA
LPG 22:4;0	LPG	GPL	LYS	22	4	4	0	NA	NA
LPG 22:5;0	LPG	GPL	LYS	22	5	5	0	NA	NA
LPG 22:6;0	LPG	GPL	LYS	22	6	6	0	0.0459507	0.0846196
LPI 14:0;0	LPI	GPL	LYS	14	0	0	0	NA	NA
LPI 16:0;0	LPI	GPL	LYS	16	0	0	0	NA	0.374188
LPI 18:0;0	LPI	GPL	LYS	18	0	0	0	2.02534	4.53819
LPI 18:1;0	LPI	GPL	LYS	18	1	1	0	0.716046	1.0228
LPI 20:2;0	LPI	GPL	LYS	20	2	2	0	NA	NA
LPI 20:4;0	LPI	GPL	LYS	20	4	4	0	0.339521	0.667551
LPI 20:5;0	LPI	GPL	LYS	20	5	5	0	NA	NA
LPI 22:6;0	LPI	GPL	LYS	22	6	6	0	NA	NA
LPS 16:0;0	LPS	GPL	LYS	16	0	0	0	NA	NA
LPS 16:1;0	LPS	GPL	LYS	16	1	1	0	NA	NA
LPS 18:0;0	LPS	GPL	LYS	18	0	0	0	0.844714	2.51938
LPS 18:1;0	LPS	GPL	LYS	18	1	1	0	0.610311	1.68411
LPS 18:2;0	LPS	GPL	LYS	18	2	2	0	NA	0.113412
LPS 20:0;0	LPS	GPL	LYS	20	0	0	0	NA	NA
LPS 20:1;0	LPS	GPL	LYS	20	1	1	0	NA	NA
LPS 20:2;0	LPS	GPL	LYS	20	2	2	0	NA	NA
LPS 20:3;0	LPS	GPL	LYS	20	3	3	0	NA	NA
LPS 20:4;0	LPS	GPL	LYS	20	4	4	0	NA	NA
LPS 22:0;0	LPS	GPL	LYS	22	0	0	0	NA	NA
LPS 22:1;0	LPS	GPL	LYS	22	1	1	0	NA	NA
LPS 22:5;0	LPS	GPL	LYS	22	5	5	0	NA	NA
LPS 22:6;0	LPS	GPL	LYS	22	6	6	0	NA	0.126068
LPS 24:0;0	LPS	GPL	LYS	24	0	0	0	NA	0.123851
LPS 24:1;0	LPS	GPL	LYS	24	1	1	0	NA	0.131537
PA 12:0;0-12:0;0	PA	GPL	MEM	24	0	0	0	NA	NA
PA 14:0;0-16:0;0	PA	GPL	MEM	30	0	0	0	NA	NA
PA 14:0;0-18:0;0	PA	GPL	MEM	32	0	0	0	NA	NA
PA 14:0;0-18:1;0	PA	GPL	MEM	32	1	1	0	NA	NA
PA 15:0;0-15:0;0	PA	GPL	MEM	30	0	0	0	NA	NA
PA 15:0;0-17:0;0	PA	GPL	MEM	32	0	0	0	NA	NA
PA 16:0;0-16:0;0	PA	GPL	MEM	32	0	0	0	NA	NA
PA 16:0;0-16:1;0	PA	GPL	MEM	32	1	1	0	NA	NA
PA 16:0;0-18:1;0	PA	GPL	MEM	34	1	1	0	NA	0.29858
PA 16:0;0-18:2;0	PA	GPL	MEM	34	2	2	0	NA	NA
PA 16:0;0-20:0;0	PA	GPL	MEM	36	0	0	0	NA	NA
PA 16:0;0-20:1;0	PA	GPL	MEM	36	1	1	0	NA	NA
PA 16:0;0-20:2;0	PA	GPL	MEM	36	2	2	0	NA	NA
PA 16:0;0-20:3;0	PA	GPL	MEM	36	3	3	0	NA	NA
PA 16:0;0-20:4;0	PA	GPL	MEM	36	4	4	0	NA	NA
PA 16:0;0-22:4;0	PA	GPL	MEM	38	4	4	0	NA	NA
PA 16:1;0-18:0;0	PA	GPL	MEM	34	1	1	0	NA	NA
PA 16:1;0-18:1;0	PA	GPL	MEM	34	2	2	0	NA	NA
PA 17:0;0-17:1;0	PA	GPL	MEM	34	1	1	0	NA	NA
PA 17:1;0-17:1;0	PA	GPL	MEM	34	2	2	0	NA	NA
PA 18:0;0-18:0;0	PA	GPL	MEM	36	0	0	0	NA	NA
PA 18:0;0-18:1;0	PA	GPL	MEM	36	1	1	0	NA	0.584983
PA 18:0;0-18:2;0	PA	GPL	MEM	36	2	2	0	NA	0.217467
PA 18:0;0-20:3;0	PA	GPL	MEM	38	3	3	0	NA	NA
PA 18:0;0-20:4;0	PA	GPL	MEM	38	4	4	0	NA	NA
PA 18:0;0-22:6;0	PA	GPL	MEM	40	6	6	0	NA	NA
PA 18:1;0-18:1;0	PA	GPL	MEM	36	2	2	0	NA	0.0469739
PA 18:1;0-18:2;0	PA	GPL	MEM	36	3	3	0	NA	NA
PA 18:1;0-20:3;0	PA	GPL	MEM	38	4	4	0	NA	NA
PA 18:1;0-20:4;0	PA	GPL	MEM	38	5	5	0	NA	NA
PA 18:2;0-18:2;0	PA	GPL	MEM	36	4	4	0	NA	NA
PA 18:2;0-20:4;0	PA	GPL	MEM	38	6	6	0	NA	NA
PA 22:5;0-22:5;0	PA	GPL	MEM	44	10	10	0	NA	NA
PC 12:0;0-14:0;0	PC	GPL	MEM	26	0	0	0	NA	NA
PC 12:0;0-16:0;0	PC	GPL	MEM	28	0	0	0	NA	0.602599
PC 12:0;0-16:1;0	PC	GPL	MEM	28	1	1	0	NA	NA
PC 12:0;0-18:0;0	PC	GPL	MEM	30	0	0	0	NA	NA
PC 12:0;0-22:4;0	PC	GPL	MEM	34	4	4	0	NA	NA
PC 13:0;0-15:0;0	PC	GPL	MEM	28	0	0	0	NA	NA
PC 13:0;0-16:0;0	PC	GPL	MEM	29	0	0	0	NA	NA
PC 13:0;0-16:1;0	PC	GPL	MEM	29	1	1	0	NA	NA
PC 13:0;0-18:0;0	PC	GPL	MEM	31	0	0	0	NA	NA
PC 13:0;0-18:1;0	PC	GPL	MEM	31	1	1	0	NA	NA
PC 14:0;0-14:0;0	PC	GPL	MEM	28	0	0	0	NA	1.07471
PC 14:0;0-14:1;0	PC	GPL	MEM	28	1	1	0	NA	NA
PC 14:0;0-15:0;0	PC	GPL	MEM	29	0	0	0	NA	NA
PC 14:0;0-16:0;0	PC	GPL	MEM	30	0	0	0	3.19502	12.5301
PC 14:0;0-16:2;0	PC	GPL	MEM	30	2	2	0	NA	NA
PC 14:0;0-17:0;0	PC	GPL	MEM	31	0	0	0	0.290258	0.600986
PC 14:0;0-17:1;0	PC	GPL	MEM	31	1	1	0	1.01429	2.68885
PC 14:0;0-18:0;0	PC	GPL	MEM	32	0	0	0	1.33195	3.96545
PC 14:0;0-18:1;0	PC	GPL	MEM	32	1	1	0	10.8533	28.9876
PC 14:0;0-18:2;0	PC	GPL	MEM	32	2	2	0	2.10841	6.23583
PC 14:0;0-19:0;0	PC	GPL	MEM	33	0	0	0	NA	NA
PC 14:0;0-19:1;0	PC	GPL	MEM	33	1	1	0	NA	0.172535
PC 14:0;0-20:0;0	PC	GPL	MEM	34	0	0	0	NA	0.275699
PC 14:0;0-20:1;0	PC	GPL	MEM	34	1	1	0	0.536896	1.7375
PC 14:0;0-20:2;0	PC	GPL	MEM	34	2	2	0	NA	NA
PC 14:0;0-20:3;0	PC	GPL	MEM	34	3	3	0	NA	NA
PC 14:0;0-20:4;0	PC	GPL	MEM	34	4	4	0	NA	8.10497
PC 14:0;0-22:1;0	PC	GPL	MEM	36	1	1	0	NA	0.144338
PC 14:0;0-22:3;0	PC	GPL	MEM	36	3	3	0	NA	NA
PC 14:0;0-22:4;0	PC	GPL	MEM	36	4	4	0	NA	NA
PC 14:0;0-22:5;0	PC	GPL	MEM	36	5	5	0	NA	NA
PC 14:0;0-22:6;0	PC	GPL	MEM	36	6	6	0	NA	NA
PC 14:0;0-24:1;0	PC	GPL	MEM	38	1	1	0	NA	0.246926
PC 14:0;0-24:4;0	PC	GPL	MEM	38	4	4	0	NA	NA
PC 14:0;0-24:5;0	PC	GPL	MEM	38	5	5	0	NA	NA
PC 14:1;0-16:1;0	PC	GPL	MEM	30	2	2	0	NA	NA
PC 14:1;0-17:1;0	PC	GPL	MEM	31	2	2	0	NA	1.17126
PC 14:1;0-18:0;0	PC	GPL	MEM	32	1	1	0	2.61369	6.24421
PC 14:1;0-18:1;0	PC	GPL	MEM	32	2	2	0	34.5832	83.6779
PC 15:0;0-15:0;0	PC	GPL	MEM	30	0	0	0	NA	0.0992807
PC 15:0;0-16:0;0	PC	GPL	MEM	31	0	0	0	0.412847	1.2812
PC 15:0;0-16:1;0	PC	GPL	MEM	31	1	1	0	1.89735	3.36603
PC 15:0;0-16:2;0	PC	GPL	MEM	31	2	2	0	NA	NA
PC 15:0;0-17:0;0	PC	GPL	MEM	32	0	0	0	0.462365	0.370257
PC 15:0;0-17:1;0	PC	GPL	MEM	32	1	1	0	0.326494	1.0026
PC 15:0;0-18:0;0	PC	GPL	MEM	33	0	0	0	NA	NA
PC 15:0;0-18:1;0	PC	GPL	MEM	33	1	1	0	5.66959	15.7343
PC 15:0;0-18:2;0	PC	GPL	MEM	33	2	2	0	NA	NA
PC 15:0;0-19:1;0	PC	GPL	MEM	34	1	1	0	NA	NA
PC 15:0;0-20:1;0	PC	GPL	MEM	35	1	1	0	NA	1.27643
PC 15:0;0-20:2;0	PC	GPL	MEM	35	2	2	0	NA	NA
PC 15:0;0-20:3;0	PC	GPL	MEM	35	3	3	0	NA	NA
PC 15:0;0-20:4;0	PC	GPL	MEM	35	4	4	0	NA	NA
PC 15:0;0-22:1;0	PC	GPL	MEM	37	1	1	0	0.257794	0.477772
PC 15:0;0-22:4;0	PC	GPL	MEM	37	4	4	0	NA	NA
PC 15:0;0-22:5;0	PC	GPL	MEM	37	5	5	0	NA	NA
PC 15:0;0-22:6;0	PC	GPL	MEM	37	6	6	0	NA	0.923903
PC 15:0;0-24:4;0	PC	GPL	MEM	39	4	4	0	NA	NA
PC 15:1;0-16:0;0	PC	GPL	MEM	31	1	1	0	1.05882	2.03847
PC 15:1;0-17:0;0	PC	GPL	MEM	32	1	1	0	NA	NA
PC 15:1;0-18:0;0	PC	GPL	MEM	33	1	1	0	NA	NA
PC 15:1;0-18:1;0	PC	GPL	MEM	33	2	2	0	NA	NA
PC 16:0;0-16:0;0	PC	GPL	MEM	32	0	0	0	4.84261	13.6995
PC 16:0;0-16:1;0	PC	GPL	MEM	32	1	1	0	16.0691	37.3623
PC 16:0;0-16:2;0	PC	GPL	MEM	32	2	2	0	1.919	3.73269
PC 16:0;0-17:1;0	PC	GPL	MEM	33	1	1	0	5.15334	15.3943
PC 16:0;0-17:2;0	PC	GPL	MEM	33	2	2	0	NA	NA
PC 16:0;0-18:0;0	PC	GPL	MEM	34	0	0	0	NA	NA
PC 16:0;0-18:1;0	PC	GPL	MEM	34	1	1	0	109.801	295.131
PC 16:0;0-18:2;0	PC	GPL	MEM	34	2	2	0	7.34802	19.7763
PC 16:0;0-18:3;0	PC	GPL	MEM	34	3	3	0	0.386605	0.786002
PC 16:0;0-19:0;0	PC	GPL	MEM	35	0	0	0	NA	NA
PC 16:0;0-19:1;0	PC	GPL	MEM	35	1	1	0	0.873263	2.19208
PC 16:0;0-19:2;0	PC	GPL	MEM	35	2	2	0	NA	0.290504
PC 16:0;0-20:1;0	PC	GPL	MEM	36	1	1	0	2.71007	8.08201
PC 16:0;0-20:2;0	PC	GPL	MEM	36	2	2	0	0.869486	3.05734
PC 16:0;0-20:3;0	PC	GPL	MEM	36	3	3	0	1.26182	3.50679
PC 16:0;0-20:4;0	PC	GPL	MEM	36	4	4	0	1.83634	6.06167
PC 16:0;0-20:5;0	PC	GPL	MEM	36	5	5	0	NA	NA
PC 16:0;0-20:6;0	PC	GPL	MEM	36	6	6	0	NA	20.4958
PC 16:0;0-21:3;0	PC	GPL	MEM	37	3	3	0	NA	NA
PC 16:0;0-22:1;0	PC	GPL	MEM	38	1	1	0	0.159828	0.754781
PC 16:0;0-22:2;0	PC	GPL	MEM	38	2	2	0	0.187041	NA
PC 16:0;0-22:3;0	PC	GPL	MEM	38	3	3	0	0.199777	0.745218
PC 16:0;0-22:4;0	PC	GPL	MEM	38	4	4	0	0.695293	2.49829
PC 16:0;0-22:5;0	PC	GPL	MEM	38	5	5	0	1.59525	4.37043
PC 16:0;0-22:6;0	PC	GPL	MEM	38	6	6	0	1.21131	5.73524
PC 16:0;0-24:1;0	PC	GPL	MEM	40	1	1	0	NA	0.806334
PC 16:0;0-24:2;0	PC	GPL	MEM	40	2	2	0	NA	0.474248
PC 16:0;0-24:3;0	PC	GPL	MEM	40	3	3	0	NA	NA
PC 16:0;0-24:4;0	PC	GPL	MEM	40	4	4	0	NA	0.361763
PC 16:0;0-24:5;0	PC	GPL	MEM	40	5	5	0	NA	0.371077
PC 16:0;0-24:6;0	PC	GPL	MEM	40	6	6	0	NA	NA
PC 16:1;0-16:1;0	PC	GPL	MEM	32	2	2	0	6.70317	16.2904
PC 16:1;0-16:2;0	PC	GPL	MEM	32	3	3	0	NA	NA
PC 16:1;0-17:0;0	PC	GPL	MEM	33	1	1	0	0.332024	0.914244
PC 16:1;0-17:1;0	PC	GPL	MEM	33	2	2	0	3.64427	10.5051
PC 16:1;0-18:0;0	PC	GPL	MEM	34	1	1	0	2.62911	6.45034
PC 16:1;0-18:1;0	PC	GPL	MEM	34	2	2	0	27.6678	74.3745
PC 16:1;0-18:2;0	PC	GPL	MEM	34	3	3	0	3.57437	4.50462
PC 16:1;0-19:1;0	PC	GPL	MEM	35	2	2	0	0.128132	0.443676
PC 16:1;0-20:0;0	PC	GPL	MEM	36	1	1	0	NA	0.364896
PC 16:1;0-20:1;0	PC	GPL	MEM	36	2	2	0	1.54124	4.17716
PC 16:1;0-20:2;0	PC	GPL	MEM	36	3	3	0	0.274561	0.988313
PC 16:1;0-20:3;0	PC	GPL	MEM	36	4	4	0	NA	0.839832
PC 16:1;0-20:4;0	PC	GPL	MEM	36	5	5	0	4.27536	12.8172
PC 16:1;0-20:5;0	PC	GPL	MEM	36	6	6	0	NA	NA
PC 16:1;0-22:1;0	PC	GPL	MEM	38	2	2	0	0.159454	0.40325
PC 16:1;0-22:4;0	PC	GPL	MEM	38	5	5	0	NA	0.69552
PC 16:1;0-22:5;0	PC	GPL	MEM	38	6	6	0	0.232616	0.957397
PC 16:1;0-22:6;0	PC	GPL	MEM	38	7	7	0	NA	NA
PC 16:1;0-24:1;0	PC	GPL	MEM	40	2	2	0	NA	0.168016
PC 16:1;0-24:4;0	PC	GPL	MEM	40	5	5	0	NA	NA
PC 16:2;0-18:0;0	PC	GPL	MEM	34	2	2	0	NA	NA
PC 16:2;0-18:1;0	PC	GPL	MEM	34	3	3	0	NA	4.28789
PC 17:0;0-17:1;0	PC	GPL	MEM	34	1	1	0	0.487328	0.793738
PC 17:0;0-18:1;0	PC	GPL	MEM	35	1	1	0	4.2672	10.7403
PC 17:0;0-18:2;0	PC	GPL	MEM	35	2	2	0	0.502453	0.951591
PC 17:0;0-19:1;0	PC	GPL	MEM	36	1	1	0	0.0940163	0.153477
PC 17:0;0-20:1;0	PC	GPL	MEM	37	1	1	0	0.134711	0.608359
PC 17:0;0-20:2;0	PC	GPL	MEM	37	2	2	0	NA	0.151247
PC 17:0;0-20:3;0	PC	GPL	MEM	37	3	3	0	0.579785	NA
PC 17:0;0-20:4;0	PC	GPL	MEM	37	4	4	0	NA	1.53671
PC 17:0;0-20:5;0	PC	GPL	MEM	37	5	5	0	0.563755	NA
PC 17:0;0-20:6;0	PC	GPL	MEM	37	6	6	0	NA	1.1219
PC 17:0;0-22:4;0	PC	GPL	MEM	39	4	4	0	NA	0.913194
PC 17:0;0-22:5;0	PC	GPL	MEM	39	5	5	0	0.137064	0.369282
PC 17:0;0-22:6;0	PC	GPL	MEM	39	6	6	0	NA	0.0459114
PC 17:0;0-24:4;0	PC	GPL	MEM	41	4	4	0	NA	NA
PC 17:1;0-17:1;0	PC	GPL	MEM	34	2	2	0	0.41876	0.953925
PC 17:1;0-18:0;0	PC	GPL	MEM	35	1	1	0	NA	1.34515
PC 17:1;0-18:1;0	PC	GPL	MEM	35	2	2	0	9.04048	25.5501
PC 17:1;0-18:2;0	PC	GPL	MEM	35	3	3	0	0.930038	2.70965
PC 17:1;0-19:1;0	PC	GPL	MEM	36	2	2	0	NA	NA
PC 17:1;0-19:2;0	PC	GPL	MEM	36	3	3	0	NA	NA
PC 17:1;0-20:1;0	PC	GPL	MEM	37	2	2	0	NA	1.72999
PC 17:1;0-20:2;0	PC	GPL	MEM	37	3	3	0	NA	1.44714
PC 17:1;0-20:3;0	PC	GPL	MEM	37	4	4	0	NA	NA
PC 17:1;0-20:4;0	PC	GPL	MEM	37	5	5	0	NA	NA
PC 17:1;0-20:5;0	PC	GPL	MEM	37	6	6	0	NA	NA
PC 17:1;0-22:3;0	PC	GPL	MEM	39	4	4	0	NA	NA
PC 17:1;0-22:4;0	PC	GPL	MEM	39	5	5	0	0.342068	1.38799
PC 17:1;0-22:5;0	PC	GPL	MEM	39	6	6	0	NA	1.17791
PC 17:1;0-22:6;0	PC	GPL	MEM	39	7	7	0	NA	NA
PC 17:2;0-18:1;0	PC	GPL	MEM	35	3	3	0	NA	NA
PC 18:0;0-18:0;0	PC	GPL	MEM	36	0	0	0	NA	NA
PC 18:0;0-18:1;0	PC	GPL	MEM	36	1	1	0	15.7411	47.0062
PC 18:0;0-18:2;0	PC	GPL	MEM	36	2	2	0	3.22473	9.31882
PC 18:0;0-18:3;0	PC	GPL	MEM	36	3	3	0	NA	NA
PC 18:0;0-19:1;0	PC	GPL	MEM	37	1	1	0	0.146417	0.673025
PC 18:0;0-19:2;0	PC	GPL	MEM	37	2	2	0	NA	NA
PC 18:0;0-20:1;0	PC	GPL	MEM	38	1	1	0	0.340638	1.11626
PC 18:0;0-20:2;0	PC	GPL	MEM	38	2	2	0	0.513383	1.18421
PC 18:0;0-20:3;0	PC	GPL	MEM	38	3	3	0	0.970953	3.61589
PC 18:0;0-20:4;0	PC	GPL	MEM	38	4	4	0	0.805069	3.34163
PC 18:0;0-20:5;0	PC	GPL	MEM	38	5	5	0	NA	NA
PC 18:0;0-20:6;0	PC	GPL	MEM	38	6	6	0	NA	NA
PC 18:0;0-21:3;0	PC	GPL	MEM	39	3	3	0	NA	NA
PC 18:0;0-22:1;0	PC	GPL	MEM	40	1	1	0	NA	NA
PC 18:0;0-22:2;0	PC	GPL	MEM	40	2	2	0	NA	NA
PC 18:0;0-22:3;0	PC	GPL	MEM	40	3	3	0	NA	0.310288
PC 18:0;0-22:4;0	PC	GPL	MEM	40	4	4	0	NA	1.02951
PC 18:0;0-22:5;0	PC	GPL	MEM	40	5	5	0	0.692984	1.99103
PC 18:0;0-22:6;0	PC	GPL	MEM	40	6	6	0	NA	2.09258
PC 18:0;0-24:0;0	PC	GPL	MEM	42	0	0	0	NA	NA
PC 18:0;0-24:1;0	PC	GPL	MEM	42	1	1	0	NA	NA
PC 18:0;0-24:4;0	PC	GPL	MEM	42	4	4	0	NA	NA
PC 18:0;0-24:5;0	PC	GPL	MEM	42	5	5	0	NA	NA
PC 18:1;0-18:1;0	PC	GPL	MEM	36	2	2	0	84.8837	231.349
PC 18:1;0-18:2;0	PC	GPL	MEM	36	3	3	0	8.52786	25.1978
PC 18:1;0-18:3;0	PC	GPL	MEM	36	4	4	0	0.842054	1.41853
PC 18:1;0-19:0;0	PC	GPL	MEM	37	1	1	0	NA	NA
PC 18:1;0-19:1;0	PC	GPL	MEM	37	2	2	0	2.53875	4.42761
PC 18:1;0-19:2;0	PC	GPL	MEM	37	3	3	0	NA	NA
PC 18:1;0-20:0;0	PC	GPL	MEM	38	1	1	0	0.322088	NA
PC 18:1;0-20:1;0	PC	GPL	MEM	38	2	2	0	7.97374	23.4326
PC 18:1;0-20:2;0	PC	GPL	MEM	38	3	3	0	2.84144	8.4314
PC 18:1;0-20:3;0	PC	GPL	MEM	38	4	4	0	1.21387	3.26545
PC 18:1;0-20:4;0	PC	GPL	MEM	38	5	5	0	1.72651	4.72501
PC 18:1;0-20:5;0	PC	GPL	MEM	38	6	6	0	NA	NA
PC 18:1;0-20:6;0	PC	GPL	MEM	38	7	7	0	NA	NA
PC 18:1;0-21:1;0	PC	GPL	MEM	39	2	2	0	NA	NA
PC 18:1;0-21:3;0	PC	GPL	MEM	39	4	4	0	NA	NA
PC 18:1;0-22:1;0	PC	GPL	MEM	40	2	2	0	0.681865	1.58308
PC 18:1;0-22:2;0	PC	GPL	MEM	40	3	3	0	NA	0.966907
PC 18:1;0-22:3;0	PC	GPL	MEM	40	4	4	0	NA	0.370824
PC 18:1;0-22:4;0	PC	GPL	MEM	40	5	5	0	0.552046	1.78188
PC 18:1;0-22:5;0	PC	GPL	MEM	40	6	6	0	1.57323	3.93033
PC 18:1;0-22:6;0	PC	GPL	MEM	40	7	7	0	1.40051	5.22412
PC 18:1;0-24:0;0	PC	GPL	MEM	42	1	1	0	NA	0.757759
PC 18:1;0-24:1;0	PC	GPL	MEM	42	2	2	0	NA	1.43477
PC 18:1;0-24:4;0	PC	GPL	MEM	42	5	5	0	NA	NA
PC 18:1;0-24:5;0	PC	GPL	MEM	42	6	6	0	NA	NA
PC 18:1;0-24:6;0	PC	GPL	MEM	42	7	7	0	NA	NA
PC 18:2;0-18:2;0	PC	GPL	MEM	36	4	4	0	0.132557	0.515496
PC 18:2;0-18:3;0	PC	GPL	MEM	36	5	5	0	NA	NA
PC 18:2;0-19:1;0	PC	GPL	MEM	37	3	3	0	NA	NA
PC 18:2;0-20:1;0	PC	GPL	MEM	38	3	3	0	0.837401	2.19919
PC 18:2;0-20:2;0	PC	GPL	MEM	38	4	4	0	NA	NA
PC 18:2;0-20:3;0	PC	GPL	MEM	38	5	5	0	NA	NA
PC 18:2;0-20:4;0	PC	GPL	MEM	38	6	6	0	NA	NA
PC 18:2;0-22:4;0	PC	GPL	MEM	40	6	6	0	NA	NA
PC 18:2;0-22:5;0	PC	GPL	MEM	40	7	7	0	NA	NA
PC 19:0;0-20:4;0	PC	GPL	MEM	39	4	4	0	NA	NA
PC 19:1;0-20:1;0	PC	GPL	MEM	39	2	2	0	NA	1.08099
PC 19:1;0-20:4;0	PC	GPL	MEM	39	5	5	0	NA	NA
PC 20:0;0-20:4;0	PC	GPL	MEM	40	4	4	0	NA	NA
PC 20:1;0-20:1;0	PC	GPL	MEM	40	2	2	0	0.0492144	0.0999612
PC 20:1;0-20:2;0	PC	GPL	MEM	40	3	3	0	NA	NA
PC 20:1;0-20:3;0	PC	GPL	MEM	40	4	4	0	NA	NA
PC 20:1;0-20:4;0	PC	GPL	MEM	40	5	5	0	NA	NA
PC 20:1;0-22:4;0	PC	GPL	MEM	42	5	5	0	NA	NA
PC 20:2;0-20:2;0	PC	GPL	MEM	40	4	4	0	NA	NA
PC 20:2;0-20:3;0	PC	GPL	MEM	40	5	5	0	NA	NA
PC 20:2;0-20:4;0	PC	GPL	MEM	40	6	6	0	NA	NA
PC 20:3;0-20:3;0	PC	GPL	MEM	40	6	6	0	NA	NA
PC 20:3;0-20:4;0	PC	GPL	MEM	40	7	7	0	NA	NA
PC 20:3;0-22:4;0	PC	GPL	MEM	42	7	7	0	NA	NA
PC 20:4;0-20:4;0	PC	GPL	MEM	40	8	8	0	NA	NA
PC O- 16:0;0-16:0;0	PC O-	GPL	MEM	32	0	0	0	0.850449	1.92618
PC O- 16:0;0-16:1;0	PC O-	GPL	MEM	32	1	0	0	1.70866	3.34378
PC O- 16:0;0-16:2;0	PC O-	GPL	MEM	32	2	1	0	NA	0.144025
PC O- 16:0;0-17:0;0	PC O-	GPL	MEM	33	0	0	0	NA	NA
PC O- 16:0;0-17:1;0	PC O-	GPL	MEM	33	1	0	0	0.0261696	0.0775585
PC O- 16:0;0-18:0;0	PC O-	GPL	MEM	34	0	0	0	NA	NA
PC O- 16:0;0-18:1;0	PC O-	GPL	MEM	34	1	0	0	9.57763	22.9103
PC O- 16:0;0-18:2;0	PC O-	GPL	MEM	34	2	1	0	0.736781	1.87317
PC O- 16:0;0-18:3;0	PC O-	GPL	MEM	34	3	2	0	NA	0.0432713
PC O- 16:0;0-19:1;0	PC O-	GPL	MEM	35	1	0	0	NA	NA
PC O- 16:0;0-19:2;0	PC O-	GPL	MEM	35	2	1	0	NA	NA
PC O- 16:0;0-20:0;0	PC O-	GPL	MEM	36	0	0	0	NA	NA
PC O- 16:0;0-20:1;0	PC O-	GPL	MEM	36	1	0	0	0.235784	0.504813
PC O- 16:0;0-20:2;0	PC O-	GPL	MEM	36	2	1	0	0.143944	0.35136
PC O- 16:0;0-20:3;0	PC O-	GPL	MEM	36	3	2	0	0.291131	0.781467
PC O- 16:0;0-20:4;0	PC O-	GPL	MEM	36	4	3	0	1.63554	3.93731
PC O- 16:0;0-20:5;0	PC O-	GPL	MEM	36	5	4	0	NA	NA
PC O- 16:0;0-20:6;0	PC O-	GPL	MEM	36	6	5	0	NA	NA
PC O- 16:0;0-22:1;0	PC O-	GPL	MEM	38	1	0	0	NA	0.31569
PC O- 16:0;0-22:2;0	PC O-	GPL	MEM	38	2	1	0	NA	0.232882
PC O- 16:0;0-22:3;0	PC O-	GPL	MEM	38	3	2	0	NA	0.103412
PC O- 16:0;0-22:4;0	PC O-	GPL	MEM	38	4	3	0	0.392774	1.25248
PC O- 16:0;0-22:5;0	PC O-	GPL	MEM	38	5	4	0	0.965182	2.6131
PC O- 16:0;0-22:6;0	PC O-	GPL	MEM	38	6	5	0	NA	0.935749
PC O- 16:0;0-24:1;0	PC O-	GPL	MEM	40	1	0	0	NA	NA
PC O- 16:0;0-24:2;0	PC O-	GPL	MEM	40	2	1	0	NA	NA
PC O- 16:0;0-24:4;0	PC O-	GPL	MEM	40	4	3	0	NA	0.242129
PC O- 16:0;0-24:5;0	PC O-	GPL	MEM	40	5	4	0	NA	NA
PC O- 16:0;0-24:6;0	PC O-	GPL	MEM	40	6	5	0	NA	NA
PC O- 16:1;0-16:0;0	PC O-	GPL	MEM	32	1	0	0	0.941571	1.99507
PC O- 16:1;0-16:1;0	PC O-	GPL	MEM	32	2	1	0	0.533589	0.983399
PC O- 16:1;0-17:0;0	PC O-	GPL	MEM	33	1	0	0	0.234401	0.263256
PC O- 16:1;0-17:1;0	PC O-	GPL	MEM	33	2	1	0	NA	NA
PC O- 16:1;0-18:0;0	PC O-	GPL	MEM	34	1	0	0	0.230539	0.59458
PC O- 16:1;0-18:1;0	PC O-	GPL	MEM	34	2	1	0	1.42646	3.54866
PC O- 16:1;0-18:2;0	PC O-	GPL	MEM	34	3	2	0	0.100008	0.341887
PC O- 16:1;0-20:1;0	PC O-	GPL	MEM	36	2	1	0	0.130561	0.26533
PC O- 16:1;0-20:2;0	PC O-	GPL	MEM	36	3	2	0	NA	0.101048
PC O- 16:1;0-20:3;0	PC O-	GPL	MEM	36	4	3	0	0.133741	0.658438
PC O- 16:1;0-20:4;0	PC O-	GPL	MEM	36	5	4	0	NA	1.68008
PC O- 16:1;0-22:3;0	PC O-	GPL	MEM	38	4	3	0	NA	NA
PC O- 16:1;0-22:4;0	PC O-	GPL	MEM	38	5	4	0	NA	0.401347
PC O- 16:1;0-22:5;0	PC O-	GPL	MEM	38	6	5	0	NA	1.63186
PC O- 16:1;0-22:6;0	PC O-	GPL	MEM	38	7	6	0	NA	NA
PC O- 16:1;0-24:4;0	PC O-	GPL	MEM	40	5	4	0	NA	NA
PC O- 16:2;0-16:0;0	PC O-	GPL	MEM	32	2	1	0	0.173906	0.412872
PC O- 16:2;0-16:1;0	PC O-	GPL	MEM	32	3	2	0	0.667601	1.24198
PC O- 16:2;0-17:0;0	PC O-	GPL	MEM	33	2	1	0	0.0145542	NA
PC O- 16:2;0-18:0;0	PC O-	GPL	MEM	34	2	1	0	0.332334	0.573349
PC O- 16:2;0-18:1;0	PC O-	GPL	MEM	34	3	2	0	0.341182	0.887176
PC O- 16:2;0-18:2;0	PC O-	GPL	MEM	34	4	3	0	NA	NA
PC O- 16:2;0-20:3;0	PC O-	GPL	MEM	36	5	4	0	NA	NA
PC O- 16:2;0-20:4;0	PC O-	GPL	MEM	36	6	5	0	NA	NA
PC O- 16:2;0-22:4;0	PC O-	GPL	MEM	38	6	5	0	NA	NA
PC O- 16:2;0-22:5;0	PC O-	GPL	MEM	38	7	6	0	NA	NA
PC O- 17:0;0-15:0;0	PC O-	GPL	MEM	32	0	0	0	0.116477	0.24261
PC O- 17:0;0-15:1;0	PC O-	GPL	MEM	32	1	0	0	0.0287181	0.0992622
PC O- 17:0;0-16:0;0	PC O-	GPL	MEM	33	0	0	0	NA	NA
PC O- 17:0;0-16:1;0	PC O-	GPL	MEM	33	1	0	0	0.867577	2.67214
PC O- 17:0;0-16:2;0	PC O-	GPL	MEM	33	2	1	0	0.0189814	0.0749062
PC O- 17:0;0-17:0;0	PC O-	GPL	MEM	34	0	0	0	NA	NA
PC O- 17:0;0-17:1;0	PC O-	GPL	MEM	34	1	0	0	0.711051	1.66154
PC O- 17:0;0-17:2;0	PC O-	GPL	MEM	34	2	1	0	NA	NA
PC O- 17:0;0-18:1;0	PC O-	GPL	MEM	35	1	0	0	NA	NA
PC O- 17:0;0-18:2;0	PC O-	GPL	MEM	35	2	1	0	0.230193	0.726569
PC O- 17:0;0-18:3;0	PC O-	GPL	MEM	35	3	2	0	NA	NA
PC O- 17:0;0-19:1;0	PC O-	GPL	MEM	36	1	0	0	0.179044	0.4376
PC O- 17:0;0-19:2;0	PC O-	GPL	MEM	36	2	1	0	NA	0.0735184
PC O- 17:0;0-20:1;0	PC O-	GPL	MEM	37	1	0	0	NA	NA
PC O- 17:0;0-20:2;0	PC O-	GPL	MEM	37	2	1	0	NA	NA
PC O- 17:0;0-20:3;0	PC O-	GPL	MEM	37	3	2	0	NA	NA
PC O- 17:0;0-20:4;0	PC O-	GPL	MEM	37	4	3	0	NA	NA
PC O- 17:0;0-20:5;0	PC O-	GPL	MEM	37	5	4	0	NA	NA
PC O- 17:0;0-20:6;0	PC O-	GPL	MEM	37	6	5	0	NA	0.593907
PC O- 17:0;0-22:4;0	PC O-	GPL	MEM	39	4	3	0	NA	NA
PC O- 17:0;0-22:5;0	PC O-	GPL	MEM	39	5	4	0	NA	NA
PC O- 17:0;0-22:6;0	PC O-	GPL	MEM	39	6	5	0	NA	0.278577
PC O- 17:1;0-15:0;0	PC O-	GPL	MEM	32	1	0	0	0.0300518	0.114488
PC O- 17:1;0-16:0;0	PC O-	GPL	MEM	33	1	0	0	0.737161	2.3143
PC O- 17:1;0-16:1;0	PC O-	GPL	MEM	33	2	1	0	0.370538	1.08777
PC O- 17:1;0-17:0;0	PC O-	GPL	MEM	34	1	0	0	0.128123	0.224472
PC O- 17:1;0-17:1;0	PC O-	GPL	MEM	34	2	1	0	0.236583	0.417045
PC O- 17:1;0-18:0;0	PC O-	GPL	MEM	35	1	0	0	NA	NA
PC O- 17:1;0-18:1;0	PC O-	GPL	MEM	35	2	1	0	0.80165	2.5709
PC O- 17:1;0-18:2;0	PC O-	GPL	MEM	35	3	2	0	NA	NA
PC O- 17:1;0-19:1;0	PC O-	GPL	MEM	36	2	1	0	0.0297406	0.215005
PC O- 17:1;0-20:1;0	PC O-	GPL	MEM	37	2	1	0	NA	NA
PC O- 17:1;0-20:2;0	PC O-	GPL	MEM	37	3	2	0	NA	NA
PC O- 17:1;0-20:3;0	PC O-	GPL	MEM	37	4	3	0	NA	NA
PC O- 17:1;0-20:4;0	PC O-	GPL	MEM	37	5	4	0	NA	1.0446
PC O- 17:1;0-20:5;0	PC O-	GPL	MEM	37	6	5	0	NA	NA
PC O- 17:1;0-22:4;0	PC O-	GPL	MEM	39	5	4	0	NA	NA
PC O- 17:1;0-22:5;0	PC O-	GPL	MEM	39	6	5	0	NA	0.43256
PC O- 17:1;0-22:6;0	PC O-	GPL	MEM	39	7	6	0	NA	NA
PC O- 17:2;0-15:0;0	PC O-	GPL	MEM	32	2	1	0	NA	NA
PC O- 17:2;0-16:0;0	PC O-	GPL	MEM	33	2	1	0	0.0870973	0.17434
PC O- 17:2;0-17:0;0	PC O-	GPL	MEM	34	2	1	0	0.177486	0.0866264
PC O- 17:2;0-18:0;0	PC O-	GPL	MEM	35	2	1	0	0.0434011	0.145957
PC O- 17:2;0-18:1;0	PC O-	GPL	MEM	35	3	2	0	NA	NA
PC O- 17:2;0-18:2;0	PC O-	GPL	MEM	35	4	3	0	NA	NA
PC O- 17:2;0-20:1;0	PC O-	GPL	MEM	37	3	2	0	NA	NA
PC O- 17:2;0-20:4;0	PC O-	GPL	MEM	37	6	5	0	NA	NA
PC O- 18:0;0-14:0;0	PC O-	GPL	MEM	32	0	0	0	0.519845	0.823369
PC O- 18:0;0-15:0;0	PC O-	GPL	MEM	33	0	0	0	NA	NA
PC O- 18:0;0-16:0;0	PC O-	GPL	MEM	34	0	0	0	NA	NA
PC O- 18:0;0-16:1;0	PC O-	GPL	MEM	34	1	0	0	0.451972	1.16249
PC O- 18:0;0-17:1;0	PC O-	GPL	MEM	35	1	0	0	NA	NA
PC O- 18:0;0-18:0;0	PC O-	GPL	MEM	36	0	0	0	NA	NA
PC O- 18:0;0-18:1;0	PC O-	GPL	MEM	36	1	0	0	1.7651	3.79605
PC O- 18:0;0-18:2;0	PC O-	GPL	MEM	36	2	1	0	0.420661	0.874065
PC O- 18:0;0-18:3;0	PC O-	GPL	MEM	36	3	2	0	NA	NA
PC O- 18:0;0-19:1;0	PC O-	GPL	MEM	37	1	0	0	NA	NA
PC O- 18:0;0-20:0;0	PC O-	GPL	MEM	38	0	0	0	NA	NA
PC O- 18:0;0-20:1;0	PC O-	GPL	MEM	38	1	0	0	NA	0.719584
PC O- 18:0;0-20:2;0	PC O-	GPL	MEM	38	2	1	0	NA	0.103328
PC O- 18:0;0-20:3;0	PC O-	GPL	MEM	38	3	2	0	NA	0.452028
PC O- 18:0;0-20:4;0	PC O-	GPL	MEM	38	4	3	0	0.360382	1.02392
PC O- 18:0;0-20:5;0	PC O-	GPL	MEM	38	5	4	0	0.149511	0.193418
PC O- 18:0;0-20:6;0	PC O-	GPL	MEM	38	6	5	0	1.15085	0.766768
PC O- 18:0;0-22:4;0	PC O-	GPL	MEM	40	4	3	0	NA	0.684779
PC O- 18:0;0-22:5;0	PC O-	GPL	MEM	40	5	4	0	0.198097	0.61226
PC O- 18:0;0-22:6;0	PC O-	GPL	MEM	40	6	5	0	NA	0.252186
PC O- 18:0;0-24:1;0	PC O-	GPL	MEM	42	1	0	0	NA	NA
PC O- 18:0;0-24:4;0	PC O-	GPL	MEM	42	4	3	0	NA	NA
PC O- 18:0;0-24:5;0	PC O-	GPL	MEM	42	5	4	0	NA	NA
PC O- 18:1;0-14:0;0	PC O-	GPL	MEM	32	1	0	0	0.793573	2.53445
PC O- 18:1;0-14:1;0	PC O-	GPL	MEM	32	2	1	0	NA	0.16278
PC O- 18:1;0-15:0;0	PC O-	GPL	MEM	33	1	0	0	0.00643575	0.0562505
PC O- 18:1;0-16:0;0	PC O-	GPL	MEM	34	1	0	0	8.29262	21.6926
PC O- 18:1;0-16:1;0	PC O-	GPL	MEM	34	2	1	0	1.45993	3.86636
PC O- 18:1;0-16:2;0	PC O-	GPL	MEM	34	3	2	0	NA	0.0426882
PC O- 18:1;0-17:0;0	PC O-	GPL	MEM	35	1	0	0	NA	NA
PC O- 18:1;0-17:1;0	PC O-	GPL	MEM	35	2	1	0	0.0192252	0.0513342
PC O- 18:1;0-18:0;0	PC O-	GPL	MEM	36	1	0	0	NA	0.399699
PC O- 18:1;0-18:1;0	PC O-	GPL	MEM	36	2	1	0	8.93912	22.8546
PC O- 18:1;0-18:2;0	PC O-	GPL	MEM	36	3	2	0	1.09686	2.88935
PC O- 18:1;0-19:1;0	PC O-	GPL	MEM	37	2	1	0	NA	NA
PC O- 18:1;0-20:0;0	PC O-	GPL	MEM	38	1	0	0	NA	0.104264
PC O- 18:1;0-20:1;0	PC O-	GPL	MEM	38	2	1	0	0.655992	1.81178
PC O- 18:1;0-20:2;0	PC O-	GPL	MEM	38	3	2	0	NA	0.697703
PC O- 18:1;0-20:3;0	PC O-	GPL	MEM	38	4	3	0	0.745184	1.96587
PC O- 18:1;0-20:4;0	PC O-	GPL	MEM	38	5	4	0	2.61653	7.7848
PC O- 18:1;0-20:5;0	PC O-	GPL	MEM	38	6	5	0	NA	0.514927
PC O- 18:1;0-22:1;0	PC O-	GPL	MEM	40	2	1	0	NA	NA
PC O- 18:1;0-22:3;0	PC O-	GPL	MEM	40	4	3	0	NA	NA
PC O- 18:1;0-22:4;0	PC O-	GPL	MEM	40	5	4	0	0.780007	2.69362
PC O- 18:1;0-22:5;0	PC O-	GPL	MEM	40	6	5	0	1.27504	5.80841
PC O- 18:1;0-22:6;0	PC O-	GPL	MEM	40	7	6	0	1.08192	3.50667
PC O- 18:1;0-24:1;0	PC O-	GPL	MEM	42	2	1	0	NA	NA
PC O- 18:1;0-24:4;0	PC O-	GPL	MEM	42	5	4	0	NA	NA
PC O- 18:1;0-24:5;0	PC O-	GPL	MEM	42	6	5	0	NA	NA
PC O- 18:2;0-14:0;0	PC O-	GPL	MEM	32	2	1	0	0.0948108	0.0912776
PC O- 18:2;0-15:0;0	PC O-	GPL	MEM	33	2	1	0	NA	NA
PC O- 18:2;0-16:0;0	PC O-	GPL	MEM	34	2	1	0	0.432125	0.651584
PC O- 18:2;0-16:1;0	PC O-	GPL	MEM	34	3	2	0	0.0356038	0.19254
PC O- 18:2;0-17:0;0	PC O-	GPL	MEM	35	2	1	0	0.0507495	0.00590456
PC O- 18:2;0-18:0;0	PC O-	GPL	MEM	36	2	1	0	0.254469	0.276609
PC O- 18:2;0-18:1;0	PC O-	GPL	MEM	36	3	2	0	0.936795	2.6072
PC O- 18:2;0-18:2;0	PC O-	GPL	MEM	36	4	3	0	NA	0.711372
PC O- 18:2;0-20:1;0	PC O-	GPL	MEM	38	3	2	0	NA	NA
PC O- 18:2;0-20:2;0	PC O-	GPL	MEM	38	4	3	0	NA	NA
PC O- 18:2;0-20:3;0	PC O-	GPL	MEM	38	5	4	0	NA	NA
PC O- 18:2;0-20:4;0	PC O-	GPL	MEM	38	6	5	0	0.238916	1.4344
PC O- 18:2;0-22:3;0	PC O-	GPL	MEM	40	5	4	0	NA	NA
PC O- 18:2;0-22:4;0	PC O-	GPL	MEM	40	6	5	0	NA	NA
PC O- 18:2;0-22:5;0	PC O-	GPL	MEM	40	7	6	0	0.534138	2.73281
PC O- 18:2;0-22:6;0	PC O-	GPL	MEM	40	8	7	0	NA	NA
PE 12:0;0-18:0;0	PE	GPL	MEM	30	0	0	0	NA	NA
PE 12:0;0-18:1;0	PE	GPL	MEM	30	1	1	0	NA	NA
PE 14:0;0-16:0;0	PE	GPL	MEM	30	0	0	0	NA	NA
PE 14:0;0-16:1;0	PE	GPL	MEM	30	1	1	0	NA	NA
PE 14:0;0-18:0;0	PE	GPL	MEM	32	0	0	0	NA	NA
PE 14:0;0-18:1;0	PE	GPL	MEM	32	1	1	0	0.206875	0.625728
PE 14:0;0-18:2;0	PE	GPL	MEM	32	2	2	0	NA	NA
PE 14:0;0-20:1;0	PE	GPL	MEM	34	1	1	0	NA	NA
PE 14:0;0-20:2;0	PE	GPL	MEM	34	2	2	0	NA	NA
PE 14:0;0-20:3;0	PE	GPL	MEM	34	3	3	0	NA	NA
PE 14:0;0-20:4;0	PE	GPL	MEM	34	4	4	0	NA	NA
PE 14:0;0-22:4;0	PE	GPL	MEM	36	4	4	0	NA	NA
PE 14:0;0-24:6;0	PE	GPL	MEM	38	6	6	0	NA	NA
PE 15:0;0-18:1;0	PE	GPL	MEM	33	1	1	0	NA	NA
PE 15:0;0-18:2;0	PE	GPL	MEM	33	2	2	0	NA	NA
PE 15:0;0-20:1;0	PE	GPL	MEM	35	1	1	0	NA	NA
PE 15:0;0-20:2;0	PE	GPL	MEM	35	2	2	0	NA	NA
PE 15:0;0-20:4;0	PE	GPL	MEM	35	4	4	0	NA	NA
PE 15:0;0-22:2;0	PE	GPL	MEM	37	2	2	0	NA	NA
PE 15:0;0-22:3;0	PE	GPL	MEM	37	3	3	0	NA	NA
PE 15:0;0-22:4;0	PE	GPL	MEM	37	4	4	0	NA	NA
PE 15:0;0-24:4;0	PE	GPL	MEM	39	4	4	0	NA	NA
PE 15:0;0-24:5;0	PE	GPL	MEM	39	5	5	0	NA	NA
PE 15:1;0-24:5;0	PE	GPL	MEM	39	6	6	0	NA	NA
PE 16:0;0-16:0;0	PE	GPL	MEM	32	0	0	0	NA	0.360149
PE 16:0;0-16:1;0	PE	GPL	MEM	32	1	1	0	0.486027	0.920497
PE 16:0;0-16:2;0	PE	GPL	MEM	32	2	2	0	NA	NA
PE 16:0;0-17:1;0	PE	GPL	MEM	33	1	1	0	NA	NA
PE 16:0;0-18:0;0	PE	GPL	MEM	34	0	0	0	NA	NA
PE 16:0;0-18:1;0	PE	GPL	MEM	34	1	1	0	6.28124	14.9847
PE 16:0;0-18:2;0	PE	GPL	MEM	34	2	2	0	0.418605	0.836227
PE 16:0;0-18:3;0	PE	GPL	MEM	34	3	3	0	NA	NA
PE 16:0;0-19:1;0	PE	GPL	MEM	35	1	1	0	0.411701	0.671533
PE 16:0;0-19:2;0	PE	GPL	MEM	35	2	2	0	NA	NA
PE 16:0;0-20:1;0	PE	GPL	MEM	36	1	1	0	0.456702	0.948802
PE 16:0;0-20:2;0	PE	GPL	MEM	36	2	2	0	NA	0.240951
PE 16:0;0-20:3;0	PE	GPL	MEM	36	3	3	0	0.37376	0.622316
PE 16:0;0-20:4;0	PE	GPL	MEM	36	4	4	0	0.89074	1.27525
PE 16:0;0-20:5;0	PE	GPL	MEM	36	5	5	0	NA	NA
PE 16:0;0-21:3;0	PE	GPL	MEM	37	3	3	0	NA	NA
PE 16:0;0-22:2;0	PE	GPL	MEM	38	2	2	0	NA	NA
PE 16:0;0-22:3;0	PE	GPL	MEM	38	3	3	0	NA	NA
PE 16:0;0-22:4;0	PE	GPL	MEM	38	4	4	0	0.899306	2.01134
PE 16:0;0-22:5;0	PE	GPL	MEM	38	5	5	0	NA	4.34807
PE 16:0;0-22:6;0	PE	GPL	MEM	38	6	6	0	NA	1.15345
PE 16:0;0-24:4;0	PE	GPL	MEM	40	4	4	0	NA	NA
PE 16:1;0-16:1;0	PE	GPL	MEM	32	2	2	0	NA	0.271894
PE 16:1;0-17:0;0	PE	GPL	MEM	33	1	1	0	NA	NA
PE 16:1;0-17:1;0	PE	GPL	MEM	33	2	2	0	NA	NA
PE 16:1;0-18:0;0	PE	GPL	MEM	34	1	1	0	0.90482	2.04
PE 16:1;0-18:1;0	PE	GPL	MEM	34	2	2	0	1.78229	3.32424
PE 16:1;0-18:2;0	PE	GPL	MEM	34	3	3	0	NA	NA
PE 16:1;0-19:1;0	PE	GPL	MEM	35	2	2	0	NA	NA
PE 16:1;0-20:1;0	PE	GPL	MEM	36	2	2	0	0.186275	0.58714
PE 16:1;0-20:2;0	PE	GPL	MEM	36	3	3	0	NA	NA
PE 16:1;0-20:3;0	PE	GPL	MEM	36	4	4	0	NA	0.152559
PE 16:1;0-20:4;0	PE	GPL	MEM	36	5	5	0	NA	0.289945
PE 16:1;0-22:1;0	PE	GPL	MEM	38	2	2	0	NA	NA
PE 16:1;0-22:2;0	PE	GPL	MEM	38	3	3	0	NA	NA
PE 16:1;0-22:3;0	PE	GPL	MEM	38	4	4	0	NA	NA
PE 16:1;0-22:4;0	PE	GPL	MEM	38	5	5	0	NA	0.347397
PE 16:1;0-22:5;0	PE	GPL	MEM	38	6	6	0	NA	1.41909
PE 16:1;0-22:6;0	PE	GPL	MEM	38	7	7	0	NA	NA
PE 16:1;0-24:0;0	PE	GPL	MEM	40	1	1	0	NA	NA
PE 16:1;0-24:1;0	PE	GPL	MEM	40	2	2	0	NA	NA
PE 16:1;0-24:4;0	PE	GPL	MEM	40	5	5	0	NA	NA
PE 16:2;0-18:0;0	PE	GPL	MEM	34	2	2	0	NA	NA
PE 17:0;0-17:1;0	PE	GPL	MEM	34	1	1	0	NA	NA
PE 17:0;0-18:1;0	PE	GPL	MEM	35	1	1	0	0.490052	1.77352
PE 17:0;0-18:2;0	PE	GPL	MEM	35	2	2	0	0.0223258	NA
PE 17:0;0-20:1;0	PE	GPL	MEM	37	1	1	0	NA	NA
PE 17:0;0-20:2;0	PE	GPL	MEM	37	2	2	0	NA	NA
PE 17:0;0-20:3;0	PE	GPL	MEM	37	3	3	0	NA	NA
PE 17:0;0-20:4;0	PE	GPL	MEM	37	4	4	0	NA	0.315122
PE 17:0;0-22:3;0	PE	GPL	MEM	39	3	3	0	NA	NA
PE 17:0;0-22:4;0	PE	GPL	MEM	39	4	4	0	NA	NA
PE 17:0;0-22:5;0	PE	GPL	MEM	39	5	5	0	NA	NA
PE 17:0;0-22:6;0	PE	GPL	MEM	39	6	6	0	NA	NA
PE 17:1;0-17:1;0	PE	GPL	MEM	34	2	2	0	0.0270476	0.0240882
PE 17:1;0-18:0;0	PE	GPL	MEM	35	1	1	0	NA	NA
PE 17:1;0-18:1;0	PE	GPL	MEM	35	2	2	0	1.27634	1.54759
PE 17:1;0-18:2;0	PE	GPL	MEM	35	3	3	0	NA	NA
PE 17:1;0-19:1;0	PE	GPL	MEM	36	2	2	0	NA	0.176849
PE 17:1;0-20:0;0	PE	GPL	MEM	37	1	1	0	NA	NA
PE 17:1;0-20:1;0	PE	GPL	MEM	37	2	2	0	0.165334	0.534296
PE 17:1;0-20:2;0	PE	GPL	MEM	37	3	3	0	NA	NA
PE 17:1;0-20:3;0	PE	GPL	MEM	37	4	4	0	NA	NA
PE 17:1;0-21:1;0	PE	GPL	MEM	38	2	2	0	0.115539	NA
PE 17:1;0-21:3;0	PE	GPL	MEM	38	4	4	0	NA	NA
PE 17:1;0-22:2;0	PE	GPL	MEM	39	3	3	0	NA	NA
PE 17:1;0-22:3;0	PE	GPL	MEM	39	4	4	0	NA	NA
PE 17:1;0-22:4;0	PE	GPL	MEM	39	5	5	0	NA	NA
PE 17:1;0-22:5;0	PE	GPL	MEM	39	6	6	0	NA	NA
PE 17:1;0-22:6;0	PE	GPL	MEM	39	7	7	0	NA	NA
PE 17:1;0-24:6;0	PE	GPL	MEM	41	7	7	0	NA	NA
PE 18:0;0-18:0;0	PE	GPL	MEM	36	0	0	0	NA	NA
PE 18:0;0-18:1;0	PE	GPL	MEM	36	1	1	0	12.5873	32.8249
PE 18:0;0-18:2;0	PE	GPL	MEM	36	2	2	0	1.4967	3.44533
PE 18:0;0-18:3;0	PE	GPL	MEM	36	3	3	0	NA	0.143186
PE 18:0;0-19:1;0	PE	GPL	MEM	37	1	1	0	NA	NA
PE 18:0;0-19:2;0	PE	GPL	MEM	37	2	2	0	NA	NA
PE 18:0;0-20:1;0	PE	GPL	MEM	38	1	1	0	NA	NA
PE 18:0;0-20:2;0	PE	GPL	MEM	38	2	2	0	0.162277	0.368645
PE 18:0;0-20:3;0	PE	GPL	MEM	38	3	3	0	1.10553	2.83171
PE 18:0;0-20:4;0	PE	GPL	MEM	38	4	4	0	3.20434	11.7513
PE 18:0;0-20:5;0	PE	GPL	MEM	38	5	5	0	NA	NA
PE 18:0;0-21:3;0	PE	GPL	MEM	39	3	3	0	NA	NA
PE 18:0;0-22:2;0	PE	GPL	MEM	40	2	2	0	NA	NA
PE 18:0;0-22:3;0	PE	GPL	MEM	40	3	3	0	NA	0.475828
PE 18:0;0-22:4;0	PE	GPL	MEM	40	4	4	0	1.36796	2.12059
PE 18:0;0-22:5;0	PE	GPL	MEM	40	5	5	0	1.70755	5.4384
PE 18:0;0-22:6;0	PE	GPL	MEM	40	6	6	0	NA	2.76876
PE 18:0;0-24:4;0	PE	GPL	MEM	42	4	4	0	NA	NA
PE 18:0;0-24:5;0	PE	GPL	MEM	42	5	5	0	NA	NA
PE 18:0;0-24:6;0	PE	GPL	MEM	42	6	6	0	NA	NA
PE 18:1;0-18:1;0	PE	GPL	MEM	36	2	2	0	19.2429	43.3127
PE 18:1;0-18:2;0	PE	GPL	MEM	36	3	3	0	1.27328	3.11478
PE 18:1;0-18:3;0	PE	GPL	MEM	36	4	4	0	NA	0.427574
PE 18:1;0-19:0;0	PE	GPL	MEM	37	1	1	0	NA	NA
PE 18:1;0-19:1;0	PE	GPL	MEM	37	2	2	0	0.119871	0.370048
PE 18:1;0-19:2;0	PE	GPL	MEM	37	3	3	0	NA	NA
PE 18:1;0-20:0;0	PE	GPL	MEM	38	1	1	0	NA	0.932027
PE 18:1;0-20:1;0	PE	GPL	MEM	38	2	2	0	0.933138	3.08522
PE 18:1;0-20:2;0	PE	GPL	MEM	38	3	3	0	0.26806	0.663055
PE 18:1;0-20:3;0	PE	GPL	MEM	38	4	4	0	1.07127	2.42492
PE 18:1;0-20:4;0	PE	GPL	MEM	38	5	5	0	2.20233	2.11575
PE 18:1;0-20:5;0	PE	GPL	MEM	38	6	6	0	NA	NA
PE 18:1;0-21:3;0	PE	GPL	MEM	39	4	4	0	NA	NA
PE 18:1;0-22:0;0	PE	GPL	MEM	40	1	1	0	NA	0.533256
PE 18:1;0-22:1;0	PE	GPL	MEM	40	2	2	0	0.462122	1.45934
PE 18:1;0-22:2;0	PE	GPL	MEM	40	3	3	0	NA	NA
PE 18:1;0-22:3;0	PE	GPL	MEM	40	4	4	0	NA	2.29829
PE 18:1;0-22:4;0	PE	GPL	MEM	40	5	5	0	1.41813	3.7305
PE 18:1;0-22:5;0	PE	GPL	MEM	40	6	6	0	3.19839	8.43408
PE 18:1;0-22:6;0	PE	GPL	MEM	40	7	7	0	NA	NA
PE 18:1;0-24:0;0	PE	GPL	MEM	42	1	1	0	0.512775	1.12801
PE 18:1;0-24:1;0	PE	GPL	MEM	42	2	2	0	0.564899	1.60188
PE 18:1;0-24:4;0	PE	GPL	MEM	42	5	5	0	NA	NA
PE 18:2;0-18:2;0	PE	GPL	MEM	36	4	4	0	0.053932	0.240431
PE 18:2;0-18:3;0	PE	GPL	MEM	36	5	5	0	NA	NA
PE 18:2;0-19:1;0	PE	GPL	MEM	37	3	3	0	NA	NA
PE 18:2;0-20:1;0	PE	GPL	MEM	38	3	3	0	0.0856042	0.162524
PE 18:2;0-20:2;0	PE	GPL	MEM	38	4	4	0	NA	NA
PE 18:2;0-20:3;0	PE	GPL	MEM	38	5	5	0	NA	NA
PE 18:2;0-20:4;0	PE	GPL	MEM	38	6	6	0	NA	NA
PE 18:2;0-22:4;0	PE	GPL	MEM	40	6	6	0	NA	NA
PE 18:2;0-22:5;0	PE	GPL	MEM	40	7	7	0	NA	NA
PE 19:0;0-20:4;0	PE	GPL	MEM	39	4	4	0	NA	NA
PE 19:1;0-20:3;0	PE	GPL	MEM	39	4	4	0	NA	NA
PE 19:1;0-20:4;0	PE	GPL	MEM	39	5	5	0	NA	NA
PE 20:0;0-20:4;0	PE	GPL	MEM	40	4	4	0	NA	NA
PE 20:1;0-20:1;0	PE	GPL	MEM	40	2	2	0	0.0123962	0.0452146
PE 20:1;0-20:3;0	PE	GPL	MEM	40	4	4	0	NA	NA
PE 20:1;0-20:4;0	PE	GPL	MEM	40	5	5	0	NA	0.155877
PE 20:2;0-20:2;0	PE	GPL	MEM	40	4	4	0	NA	NA
PE 20:2;0-20:3;0	PE	GPL	MEM	40	5	5	0	NA	NA
PE 20:2;0-20:4;0	PE	GPL	MEM	40	6	6	0	NA	NA
PE 20:3;0-20:3;0	PE	GPL	MEM	40	6	6	0	NA	NA
PE 20:3;0-20:4;0	PE	GPL	MEM	40	7	7	0	NA	NA
PE 20:3;0-22:5;0	PE	GPL	MEM	42	8	8	0	NA	NA
PE 20:4;0-20:4;0	PE	GPL	MEM	40	8	8	0	NA	NA
PE 20:4;0-22:4;0	PE	GPL	MEM	42	8	8	0	NA	NA
PE 20:4;0-24:0;0	PE	GPL	MEM	44	4	4	0	NA	NA
PE 20:4;0-24:1;0	PE	GPL	MEM	44	5	5	0	NA	NA
PE 22:4;0-22:4;0	PE	GPL	MEM	44	8	8	0	NA	NA
PE 22:6;0-22:6;0	PE	GPL	MEM	44	12	12	0	NA	NA
PE O- 16:0;0-16:1;0	PE O-	GPL	MEM	32	1	0	0	NA	NA
PE O- 16:0;0-18:1;0	PE O-	GPL	MEM	34	1	0	0	0.204017	0.397538
PE O- 16:0;0-18:2;0	PE O-	GPL	MEM	34	2	1	0	NA	NA
PE O- 16:0;0-20:1;0	PE O-	GPL	MEM	36	1	0	0	0.0536068	0.141894
PE O- 16:0;0-20:2;0	PE O-	GPL	MEM	36	2	1	0	NA	0.0383271
PE O- 16:0;0-20:3;0	PE O-	GPL	MEM	36	3	2	0	NA	0.0336962
PE O- 16:0;0-20:4;0	PE O-	GPL	MEM	36	4	3	0	0.0739978	0.166516
PE O- 16:0;0-20:5;0	PE O-	GPL	MEM	36	5	4	0	NA	0.127372
PE O- 16:0;0-22:1;0	PE O-	GPL	MEM	38	1	0	0	0.276943	0.156029
PE O- 16:0;0-22:2;0	PE O-	GPL	MEM	38	2	1	0	NA	NA
PE O- 16:0;0-22:3;0	PE O-	GPL	MEM	38	3	2	0	NA	NA
PE O- 16:0;0-22:4;0	PE O-	GPL	MEM	38	4	3	0	0.0437827	0.193673
PE O- 16:0;0-22:5;0	PE O-	GPL	MEM	38	5	4	0	NA	0.123564
PE O- 16:0;0-22:6;0	PE O-	GPL	MEM	38	6	5	0	NA	NA
PE O- 16:0;0-24:4;0	PE O-	GPL	MEM	40	4	3	0	NA	NA
PE O- 16:0;0-24:5;0	PE O-	GPL	MEM	40	5	4	0	NA	NA
PE O- 16:1;0-16:0;0	PE O-	GPL	MEM	32	1	0	0	NA	NA
PE O- 16:1;0-16:1;0	PE O-	GPL	MEM	32	2	1	0	0.102244	0.188197
PE O- 16:1;0-17:1;0	PE O-	GPL	MEM	33	2	1	0	NA	NA
PE O- 16:1;0-18:0;0	PE O-	GPL	MEM	34	1	0	0	NA	NA
PE O- 16:1;0-18:1;0	PE O-	GPL	MEM	34	2	1	0	5.18421	9.03864
PE O- 16:1;0-18:2;0	PE O-	GPL	MEM	34	3	2	0	0.478464	0.602645
PE O- 16:1;0-18:3;0	PE O-	GPL	MEM	34	4	3	0	NA	NA
PE O- 16:1;0-19:1;0	PE O-	GPL	MEM	35	2	1	0	0.0283626	0.0447956
PE O- 16:1;0-19:2;0	PE O-	GPL	MEM	35	3	2	0	NA	NA
PE O- 16:1;0-20:0;0	PE O-	GPL	MEM	36	1	0	0	NA	NA
PE O- 16:1;0-20:1;0	PE O-	GPL	MEM	36	2	1	0	1.35198	2.86161
PE O- 16:1;0-20:2;0	PE O-	GPL	MEM	36	3	2	0	0.21776	0.495347
PE O- 16:1;0-20:3;0	PE O-	GPL	MEM	36	4	3	0	0.641662	1.01877
PE O- 16:1;0-20:4;0	PE O-	GPL	MEM	36	5	4	0	5.64491	11.7689
PE O- 16:1;0-20:5;0	PE O-	GPL	MEM	36	6	5	0	0.632144	1.05843
PE O- 16:1;0-21:1;0	PE O-	GPL	MEM	37	2	1	0	NA	NA
PE O- 16:1;0-21:2;0	PE O-	GPL	MEM	37	3	2	0	NA	NA
PE O- 16:1;0-21:3;0	PE O-	GPL	MEM	37	4	3	0	NA	NA
PE O- 16:1;0-22:1;0	PE O-	GPL	MEM	38	2	1	0	0.224339	0.449532
PE O- 16:1;0-22:2;0	PE O-	GPL	MEM	38	3	2	0	0.143583	0.311249
PE O- 16:1;0-22:3;0	PE O-	GPL	MEM	38	4	3	0	0.161134	0.372222
PE O- 16:1;0-22:4;0	PE O-	GPL	MEM	38	5	4	0	NA	2.88691
PE O- 16:1;0-22:5;0	PE O-	GPL	MEM	38	6	5	0	2.84594	8.66826
PE O- 16:1;0-22:6;0	PE O-	GPL	MEM	38	7	6	0	4.36962	10.6331
PE O- 16:1;0-24:1;0	PE O-	GPL	MEM	40	2	1	0	NA	0.034079
PE O- 16:1;0-24:2;0	PE O-	GPL	MEM	40	3	2	0	NA	0.0501795
PE O- 16:1;0-24:3;0	PE O-	GPL	MEM	40	4	3	0	NA	NA
PE O- 16:1;0-24:4;0	PE O-	GPL	MEM	40	5	4	0	0.162136	0.348492
PE O- 16:1;0-24:5;0	PE O-	GPL	MEM	40	6	5	0	NA	0.176348
PE O- 16:1;0-24:6;0	PE O-	GPL	MEM	40	7	6	0	NA	NA
PE O- 16:2;0-16:0;0	PE O-	GPL	MEM	32	2	1	0	0.147148	0.20561
PE O- 16:2;0-18:0;0	PE O-	GPL	MEM	34	2	1	0	0.216118	0.179239
PE O- 16:2;0-18:1;0	PE O-	GPL	MEM	34	3	2	0	0.146353	0.275881
PE O- 16:2;0-20:1;0	PE O-	GPL	MEM	36	3	2	0	0.0290538	0.0450857
PE O- 16:2;0-20:3;0	PE O-	GPL	MEM	36	5	4	0	NA	NA
PE O- 16:2;0-20:4;0	PE O-	GPL	MEM	36	6	5	0	NA	NA
PE O- 16:2;0-22:4;0	PE O-	GPL	MEM	38	6	5	0	NA	NA
PE O- 16:2;0-22:5;0	PE O-	GPL	MEM	38	7	6	0	NA	NA
PE O- 17:0;0-16:1;0	PE O-	GPL	MEM	33	1	0	0	NA	NA
PE O- 17:0;0-16:2;0	PE O-	GPL	MEM	33	2	1	0	NA	NA
PE O- 17:0;0-17:1;0	PE O-	GPL	MEM	34	1	0	0	NA	0.0273543
PE O- 17:0;0-18:2;0	PE O-	GPL	MEM	35	2	1	0	0.0641643	0.195284
PE O- 17:0;0-18:3;0	PE O-	GPL	MEM	35	3	2	0	NA	NA
PE O- 17:0;0-19:1;0	PE O-	GPL	MEM	36	1	0	0	0.00605458	0.0170517
PE O- 17:0;0-19:2;0	PE O-	GPL	MEM	36	2	1	0	NA	NA
PE O- 17:0;0-20:2;0	PE O-	GPL	MEM	37	2	1	0	NA	0.0627743
PE O- 17:0;0-20:3;0	PE O-	GPL	MEM	37	3	2	0	0.104186	0.220104
PE O- 17:0;0-20:4;0	PE O-	GPL	MEM	37	4	3	0	NA	NA
PE O- 17:0;0-20:5;0	PE O-	GPL	MEM	37	5	4	0	NA	NA
PE O- 17:0;0-22:4;0	PE O-	GPL	MEM	39	4	3	0	NA	NA
PE O- 17:0;0-22:5;0	PE O-	GPL	MEM	39	5	4	0	NA	0.349722
PE O- 17:0;0-22:6;0	PE O-	GPL	MEM	39	6	5	0	NA	NA
PE O- 17:1;0-15:0;0	PE O-	GPL	MEM	32	1	0	0	NA	NA
PE O- 17:1;0-16:0;0	PE O-	GPL	MEM	33	1	0	0	NA	NA
PE O- 17:1;0-16:1;0	PE O-	GPL	MEM	33	2	1	0	NA	NA
PE O- 17:1;0-17:0;0	PE O-	GPL	MEM	34	1	0	0	NA	NA
PE O- 17:1;0-17:1;0	PE O-	GPL	MEM	34	2	1	0	NA	NA
PE O- 17:1;0-18:1;0	PE O-	GPL	MEM	35	2	1	0	0.353657	0.909376
PE O- 17:1;0-18:2;0	PE O-	GPL	MEM	35	3	2	0	NA	0.131125
PE O- 17:1;0-19:1;0	PE O-	GPL	MEM	36	2	1	0	NA	NA
PE O- 17:1;0-20:1;0	PE O-	GPL	MEM	37	2	1	0	NA	0.331133
PE O- 17:1;0-20:2;0	PE O-	GPL	MEM	37	3	2	0	NA	0.0500669
PE O- 17:1;0-20:3;0	PE O-	GPL	MEM	37	4	3	0	NA	NA
PE O- 17:1;0-20:4;0	PE O-	GPL	MEM	37	5	4	0	0.316346	0.927426
PE O- 17:1;0-22:2;0	PE O-	GPL	MEM	39	3	2	0	NA	NA
PE O- 17:1;0-22:4;0	PE O-	GPL	MEM	39	5	4	0	NA	0.257623
PE O- 17:1;0-22:5;0	PE O-	GPL	MEM	39	6	5	0	NA	NA
PE O- 17:1;0-22:6;0	PE O-	GPL	MEM	39	7	6	0	NA	NA
PE O- 17:2;0-16:0;0	PE O-	GPL	MEM	33	2	1	0	NA	NA
PE O- 17:2;0-17:0;0	PE O-	GPL	MEM	34	2	1	0	NA	NA
PE O- 17:2;0-17:1;0	PE O-	GPL	MEM	34	3	2	0	NA	NA
PE O- 17:2;0-18:0;0	PE O-	GPL	MEM	35	2	1	0	0.031598	0.0180546
PE O- 17:2;0-18:1;0	PE O-	GPL	MEM	35	3	2	0	NA	0.234721
PE O- 17:2;0-19:1;0	PE O-	GPL	MEM	36	3	2	0	NA	NA
PE O- 17:2;0-20:1;0	PE O-	GPL	MEM	37	3	2	0	NA	0.0572177
PE O- 17:2;0-20:2;0	PE O-	GPL	MEM	37	4	3	0	NA	NA
PE O- 17:2;0-20:3;0	PE O-	GPL	MEM	37	5	4	0	NA	NA
PE O- 17:2;0-20:4;0	PE O-	GPL	MEM	37	6	5	0	NA	NA
PE O- 17:2;0-22:4;0	PE O-	GPL	MEM	39	6	5	0	NA	NA
PE O- 17:2;0-22:5;0	PE O-	GPL	MEM	39	7	6	0	NA	NA
PE O- 18:0;0-16:1;0	PE O-	GPL	MEM	34	1	0	0	0.0137556	0.0552851
PE O- 18:0;0-18:1;0	PE O-	GPL	MEM	36	1	0	0	0.212354	0.590283
PE O- 18:0;0-18:2;0	PE O-	GPL	MEM	36	2	1	0	0.0311931	0.164436
PE O- 18:0;0-20:1;0	PE O-	GPL	MEM	38	1	0	0	0.79696	0.781947
PE O- 18:0;0-20:2;0	PE O-	GPL	MEM	38	2	1	0	NA	NA
PE O- 18:0;0-20:3;0	PE O-	GPL	MEM	38	3	2	0	0.0337222	0.060033
PE O- 18:0;0-20:4;0	PE O-	GPL	MEM	38	4	3	0	0.0580185	0.280926
PE O- 18:0;0-20:5;0	PE O-	GPL	MEM	38	5	4	0	NA	NA
PE O- 18:0;0-22:2;0	PE O-	GPL	MEM	40	2	1	0	NA	NA
PE O- 18:0;0-22:3;0	PE O-	GPL	MEM	40	3	2	0	NA	NA
PE O- 18:0;0-22:4;0	PE O-	GPL	MEM	40	4	3	0	NA	0.0825143
PE O- 18:0;0-22:5;0	PE O-	GPL	MEM	40	5	4	0	NA	0.31176
PE O- 18:0;0-22:6;0	PE O-	GPL	MEM	40	6	5	0	NA	NA
PE O- 18:0;0-24:4;0	PE O-	GPL	MEM	42	4	3	0	NA	NA
PE O- 18:0;0-24:5;0	PE O-	GPL	MEM	42	5	4	0	NA	NA
PE O- 18:0;0-24:6;0	PE O-	GPL	MEM	42	6	5	0	NA	NA
PE O- 18:1;0-14:0;0	PE O-	GPL	MEM	32	1	0	0	NA	NA
PE O- 18:1;0-15:0;0	PE O-	GPL	MEM	33	1	0	0	NA	NA
PE O- 18:1;0-16:0;0	PE O-	GPL	MEM	34	1	0	0	0.14907	0.340101
PE O- 18:1;0-16:1;0	PE O-	GPL	MEM	34	2	1	0	0.205353	0.385067
PE O- 18:1;0-17:1;0	PE O-	GPL	MEM	35	2	1	0	0.00790606	0.0101251
PE O- 18:1;0-18:0;0	PE O-	GPL	MEM	36	1	0	0	NA	NA
PE O- 18:1;0-18:1;0	PE O-	GPL	MEM	36	2	1	0	2.90694	5.837
PE O- 18:1;0-18:2;0	PE O-	GPL	MEM	36	3	2	0	0.517644	1.1417
PE O- 18:1;0-18:3;0	PE O-	GPL	MEM	36	4	3	0	NA	NA
PE O- 18:1;0-19:1;0	PE O-	GPL	MEM	37	2	1	0	NA	0.0703802
PE O- 18:1;0-19:2;0	PE O-	GPL	MEM	37	3	2	0	NA	NA
PE O- 18:1;0-19:3;0	PE O-	GPL	MEM	37	4	3	0	NA	NA
PE O- 18:1;0-20:0;0	PE O-	GPL	MEM	38	1	0	0	NA	0.291042
PE O- 18:1;0-20:1;0	PE O-	GPL	MEM	38	2	1	0	0.791246	2.03177
PE O- 18:1;0-20:2;0	PE O-	GPL	MEM	38	3	2	0	0.144736	0.306562
PE O- 18:1;0-20:3;0	PE O-	GPL	MEM	38	4	3	0	0.277883	0.510282
PE O- 18:1;0-20:4;0	PE O-	GPL	MEM	38	5	4	0	NA	2.90947
PE O- 18:1;0-20:5;0	PE O-	GPL	MEM	38	6	5	0	0.126613	0.279546
PE O- 18:1;0-21:3;0	PE O-	GPL	MEM	39	4	3	0	NA	NA
PE O- 18:1;0-22:1;0	PE O-	GPL	MEM	40	2	1	0	NA	0.412621
PE O- 18:1;0-22:2;0	PE O-	GPL	MEM	40	3	2	0	0.0551891	0.202478
PE O- 18:1;0-22:3;0	PE O-	GPL	MEM	40	4	3	0	NA	0.245688
PE O- 18:1;0-22:4;0	PE O-	GPL	MEM	40	5	4	0	0.596642	1.86971
PE O- 18:1;0-22:5;0	PE O-	GPL	MEM	40	6	5	0	1.17604	3.32849
PE O- 18:1;0-22:6;0	PE O-	GPL	MEM	40	7	6	0	0.316006	1.53238
PE O- 18:1;0-24:2;0	PE O-	GPL	MEM	42	3	2	0	NA	NA
PE O- 18:1;0-24:3;0	PE O-	GPL	MEM	42	4	3	0	NA	NA
PE O- 18:1;0-24:4;0	PE O-	GPL	MEM	42	5	4	0	NA	NA
PE O- 18:1;0-24:5;0	PE O-	GPL	MEM	42	6	5	0	NA	NA
PE O- 18:1;0-24:6;0	PE O-	GPL	MEM	42	7	6	0	NA	NA
PE O- 18:2;0-14:0;0	PE O-	GPL	MEM	32	2	1	0	0.0262877	0.150974
PE O- 18:2;0-15:0;0	PE O-	GPL	MEM	33	2	1	0	NA	NA
PE O- 18:2;0-16:0;0	PE O-	GPL	MEM	34	2	1	0	1.01964	2.64022
PE O- 18:2;0-16:1;0	PE O-	GPL	MEM	34	3	2	0	0.380147	0.972477
PE O- 18:2;0-17:0;0	PE O-	GPL	MEM	35	2	1	0	0.0099661	0.0153586
PE O- 18:2;0-17:1;0	PE O-	GPL	MEM	35	3	2	0	NA	0.046043
PE O- 18:2;0-18:0;0	PE O-	GPL	MEM	36	2	1	0	NA	NA
PE O- 18:2;0-18:1;0	PE O-	GPL	MEM	36	3	2	0	5.59204	12.6471
PE O- 18:2;0-18:2;0	PE O-	GPL	MEM	36	4	3	0	0.721829	1.36279
PE O- 18:2;0-18:3;0	PE O-	GPL	MEM	36	5	4	0	NA	NA
PE O- 18:2;0-19:1;0	PE O-	GPL	MEM	37	3	2	0	0.118591	0.252303
PE O- 18:2;0-20:0;0	PE O-	GPL	MEM	38	2	1	0	NA	NA
PE O- 18:2;0-20:1;0	PE O-	GPL	MEM	38	3	2	0	1.29364	3.48702
PE O- 18:2;0-20:2;0	PE O-	GPL	MEM	38	4	3	0	0.24336	0.662107
PE O- 18:2;0-20:3;0	PE O-	GPL	MEM	38	5	4	0	NA	1.39141
PE O- 18:2;0-20:4;0	PE O-	GPL	MEM	38	6	5	0	5.32475	14.7264
PE O- 18:2;0-20:5;0	PE O-	GPL	MEM	38	7	6	0	NA	1.9747
PE O- 18:2;0-21:2;0	PE O-	GPL	MEM	39	4	3	0	NA	NA
PE O- 18:2;0-21:3;0	PE O-	GPL	MEM	39	5	4	0	NA	NA
PE O- 18:2;0-22:1;0	PE O-	GPL	MEM	40	3	2	0	0.278263	0.810135
PE O- 18:2;0-22:2;0	PE O-	GPL	MEM	40	4	3	0	NA	0.478665
PE O- 18:2;0-22:3;0	PE O-	GPL	MEM	40	5	4	0	0.20351	0.898619
PE O- 18:2;0-22:4;0	PE O-	GPL	MEM	40	6	5	0	1.6996	6.08574
PE O- 18:2;0-22:5;0	PE O-	GPL	MEM	40	7	6	0	3.18364	11.6011
PE O- 18:2;0-22:6;0	PE O-	GPL	MEM	40	8	7	0	3.58093	12.5971
PE O- 18:2;0-24:2;0	PE O-	GPL	MEM	42	4	3	0	NA	NA
PE O- 18:2;0-24:3;0	PE O-	GPL	MEM	42	5	4	0	NA	NA
PE O- 18:2;0-24:4;0	PE O-	GPL	MEM	42	6	5	0	NA	NA
PE O- 18:2;0-24:5;0	PE O-	GPL	MEM	42	7	6	0	NA	0.52474
PE O- 18:2;0-24:6;0	PE O-	GPL	MEM	42	8	7	0	NA	NA
PG 14:0;0-16:0;0	PG	GPL	MEM	30	0	0	0	NA	NA
PG 14:0;0-18:0;0	PG	GPL	MEM	32	0	0	0	NA	NA
PG 14:0;0-18:1;0	PG	GPL	MEM	32	1	1	0	NA	0.1099
PG 15:0;0-17:0;0	PG	GPL	MEM	32	0	0	0	NA	NA
PG 16:0;0-16:1;0	PG	GPL	MEM	32	1	1	0	NA	0.0846941
PG 16:0;0-18:0;0	PG	GPL	MEM	34	0	0	0	NA	NA
PG 16:0;0-18:1;0	PG	GPL	MEM	34	1	1	0	1.0767	2.25837
PG 16:0;0-18:2;0	PG	GPL	MEM	34	2	2	0	0.0311808	0.0618983
PG 16:0;0-19:1;0	PG	GPL	MEM	35	1	1	0	NA	NA
PG 16:0;0-20:1;0	PG	GPL	MEM	36	1	1	0	NA	0.0569314
PG 16:0;0-20:2;0	PG	GPL	MEM	36	2	2	0	NA	NA
PG 16:0;0-20:3;0	PG	GPL	MEM	36	3	3	0	NA	NA
PG 16:0;0-20:4;0	PG	GPL	MEM	36	4	4	0	NA	NA
PG 16:0;0-20:5;0	PG	GPL	MEM	36	5	5	0	NA	NA
PG 16:0;0-22:4;0	PG	GPL	MEM	38	4	4	0	NA	NA
PG 16:0;0-22:5;0	PG	GPL	MEM	38	5	5	0	NA	NA
PG 16:1;0-18:0;0	PG	GPL	MEM	34	1	1	0	NA	0.179786
PG 16:1;0-18:1;0	PG	GPL	MEM	34	2	2	0	0.677985	1.5837
PG 16:1;0-18:2;0	PG	GPL	MEM	34	3	3	0	NA	NA
PG 16:1;0-20:1;0	PG	GPL	MEM	36	2	2	0	0.0327042	NA
PG 16:1;0-20:2;0	PG	GPL	MEM	36	3	3	0	NA	NA
PG 16:1;0-20:3;0	PG	GPL	MEM	36	4	4	0	NA	NA
PG 16:1;0-20:4;0	PG	GPL	MEM	36	5	5	0	NA	NA
PG 16:1;0-22:4;0	PG	GPL	MEM	38	5	5	0	NA	0.125553
PG 16:1;0-22:5;0	PG	GPL	MEM	38	6	6	0	NA	0.172743
PG 16:1;0-22:6;0	PG	GPL	MEM	38	7	7	0	NA	NA
PG 16:1;0-24:4;0	PG	GPL	MEM	40	5	5	0	NA	NA
PG 16:2;0-22:5;0	PG	GPL	MEM	38	7	7	0	NA	NA
PG 17:0;0-18:0;0	PG	GPL	MEM	35	0	0	0	NA	NA
PG 17:0;0-18:1;0	PG	GPL	MEM	35	1	1	0	NA	0.219782
PG 17:0;0-18:2;0	PG	GPL	MEM	35	2	2	0	NA	NA
PG 17:0;0-19:0;0	PG	GPL	MEM	36	0	0	0	NA	NA
PG 17:1;0-17:1;0	PG	GPL	MEM	34	2	2	0	NA	NA
PG 17:1;0-18:1;0	PG	GPL	MEM	35	2	2	0	NA	0.434059
PG 17:1;0-18:2;0	PG	GPL	MEM	35	3	3	0	0.255275	NA
PG 17:1;0-19:0;0	PG	GPL	MEM	36	1	1	0	NA	NA
PG 17:1;0-20:4;0	PG	GPL	MEM	37	5	5	0	NA	NA
PG 18:0;0-18:0;0	PG	GPL	MEM	36	0	0	0	NA	0.285003
PG 18:0;0-18:1;0	PG	GPL	MEM	36	1	1	0	0.456186	1.40292
PG 18:0;0-18:2;0	PG	GPL	MEM	36	2	2	0	0.10604	NA
PG 18:0;0-20:1;0	PG	GPL	MEM	38	1	1	0	NA	NA
PG 18:0;0-20:2;0	PG	GPL	MEM	38	2	2	0	NA	NA
PG 18:0;0-20:3;0	PG	GPL	MEM	38	3	3	0	NA	NA
PG 18:0;0-20:4;0	PG	GPL	MEM	38	4	4	0	NA	0.0421034
PG 18:0;0-22:4;0	PG	GPL	MEM	40	4	4	0	NA	NA
PG 18:0;0-22:5;0	PG	GPL	MEM	40	5	5	0	NA	NA
PG 18:0;0-22:6;0	PG	GPL	MEM	40	6	6	0	NA	NA
PG 18:1;0-18:1;0	PG	GPL	MEM	36	2	2	0	4.40976	12.4295
PG 18:1;0-18:2;0	PG	GPL	MEM	36	3	3	0	0.690735	1.95724
PG 18:1;0-18:3;0	PG	GPL	MEM	36	4	4	0	NA	0.186025
PG 18:1;0-19:1;0	PG	GPL	MEM	37	2	2	0	NA	0.16983
PG 18:1;0-20:1;0	PG	GPL	MEM	38	2	2	0	0.185151	0.464546
PG 18:1;0-20:2;0	PG	GPL	MEM	38	3	3	0	NA	0.499212
PG 18:1;0-20:3;0	PG	GPL	MEM	38	4	4	0	0.151491	0.323007
PG 18:1;0-20:4;0	PG	GPL	MEM	38	5	5	0	NA	0.304039
PG 18:1;0-20:5;0	PG	GPL	MEM	38	6	6	0	NA	NA
PG 18:1;0-22:3;0	PG	GPL	MEM	40	4	4	0	NA	NA
PG 18:1;0-22:4;0	PG	GPL	MEM	40	5	5	0	NA	0.322657
PG 18:1;0-22:5;0	PG	GPL	MEM	40	6	6	0	NA	0.556536
PG 18:1;0-22:6;0	PG	GPL	MEM	40	7	7	0	NA	NA
PG 18:2;0-18:2;0	PG	GPL	MEM	36	4	4	0	NA	0.0780651
PG 18:2;0-20:2;0	PG	GPL	MEM	38	4	4	0	NA	NA
PG 18:2;0-20:3;0	PG	GPL	MEM	38	5	5	0	NA	NA
PG 18:2;0-20:4;0	PG	GPL	MEM	38	6	6	0	NA	0.0217847
PG 18:2;0-22:3;0	PG	GPL	MEM	40	5	5	0	NA	NA
PG 18:2;0-22:4;0	PG	GPL	MEM	40	6	6	0	NA	NA
PG 18:2;0-22:5;0	PG	GPL	MEM	40	7	7	0	NA	NA
PG 18:2;0-22:6;0	PG	GPL	MEM	40	8	8	0	NA	NA
PG 18:3;0-20:4;0	PG	GPL	MEM	38	7	7	0	NA	NA
PG 20:1;0-20:4;0	PG	GPL	MEM	40	5	5	0	NA	NA
PG 20:1;0-22:5;0	PG	GPL	MEM	42	6	6	0	NA	NA
PG 20:2;0-20:2;0	PG	GPL	MEM	40	4	4	0	NA	NA
PG 20:2;0-20:3;0	PG	GPL	MEM	40	5	5	0	NA	NA
PG 20:2;0-20:4;0	PG	GPL	MEM	40	6	6	0	NA	NA
PG 20:2;0-22:4;0	PG	GPL	MEM	42	6	6	0	NA	NA
PG 20:2;0-22:5;0	PG	GPL	MEM	42	7	7	0	NA	NA
PG 20:2;0-22:6;0	PG	GPL	MEM	42	8	8	0	NA	NA
PG 20:3;0-20:3;0	PG	GPL	MEM	40	6	6	0	NA	NA
PG 20:3;0-20:4;0	PG	GPL	MEM	40	7	7	0	NA	NA
PG 20:3;0-22:3;0	PG	GPL	MEM	42	6	6	0	NA	NA
PG 20:3;0-22:4;0	PG	GPL	MEM	42	7	7	0	NA	NA
PG 20:3;0-22:5;0	PG	GPL	MEM	42	8	8	0	NA	NA
PG 20:3;0-22:6;0	PG	GPL	MEM	42	9	9	0	NA	NA
PG 20:4;0-20:4;0	PG	GPL	MEM	40	8	8	0	NA	NA
PG 20:4;0-21:3;0	PG	GPL	MEM	41	7	7	0	NA	NA
PG 20:4;0-22:3;0	PG	GPL	MEM	42	7	7	0	NA	NA
PG 20:4;0-22:4;0	PG	GPL	MEM	42	8	8	0	NA	NA
PG 20:4;0-22:5;0	PG	GPL	MEM	42	9	9	0	NA	NA
PG 20:4;0-22:6;0	PG	GPL	MEM	42	10	10	0	NA	NA
PG 20:5;0-22:4;0	PG	GPL	MEM	42	9	9	0	NA	NA
PG 20:5;0-22:5;0	PG	GPL	MEM	42	10	10	0	NA	NA
PG 22:3;0-22:4;0	PG	GPL	MEM	44	7	7	0	NA	NA
PG 22:3;0-22:5;0	PG	GPL	MEM	44	8	8	0	NA	NA
PG 22:4;0-22:4;0	PG	GPL	MEM	44	8	8	0	NA	NA
PG 22:4;0-22:5;0	PG	GPL	MEM	44	9	9	0	NA	NA
PG 22:4;0-22:6;0	PG	GPL	MEM	44	10	10	0	NA	NA
PG 22:5;0-22:5;0	PG	GPL	MEM	44	10	10	0	NA	NA
PG 22:5;0-22:6;0	PG	GPL	MEM	44	11	11	0	NA	NA
PG 22:6;0-22:6;0	PG	GPL	MEM	44	12	12	0	NA	NA
PI 14:0;0-18:1;0	PI	GPL	MEM	32	1	1	0	0.0307949	0.0848144
PI 14:1;0-18:0;0	PI	GPL	MEM	32	1	1	0	NA	0.0592767
PI 15:0;0-17:1;0	PI	GPL	MEM	32	1	1	0	0.00726802	0.00913469
PI 15:0;0-18:1;0	PI	GPL	MEM	33	1	1	0	NA	NA
PI 15:0;0-19:2;0	PI	GPL	MEM	34	2	2	0	NA	NA
PI 15:0;0-20:1;0	PI	GPL	MEM	35	1	1	0	NA	NA
PI 15:0;0-20:2;0	PI	GPL	MEM	35	2	2	0	NA	0.0310715
PI 15:0;0-20:3;0	PI	GPL	MEM	35	3	3	0	NA	NA
PI 16:0;0-16:1;0	PI	GPL	MEM	32	1	1	0	0.236189	0.324385
PI 16:0;0-17:1;0	PI	GPL	MEM	33	1	1	0	NA	NA
PI 16:0;0-18:0;0	PI	GPL	MEM	34	0	0	0	NA	NA
PI 16:0;0-18:1;0	PI	GPL	MEM	34	1	1	0	1.49193	3.81403
PI 16:0;0-18:2;0	PI	GPL	MEM	34	2	2	0	0.258685	0.471352
PI 16:0;0-19:1;0	PI	GPL	MEM	35	1	1	0	NA	0.0590134
PI 16:0;0-19:2;0	PI	GPL	MEM	35	2	2	0	NA	NA
PI 16:0;0-20:1;0	PI	GPL	MEM	36	1	1	0	0.103336	0.198053
PI 16:0;0-20:2;0	PI	GPL	MEM	36	2	2	0	0.191742	0.343675
PI 16:0;0-20:3;0	PI	GPL	MEM	36	3	3	0	0.328393	0.578774
PI 16:0;0-20:4;0	PI	GPL	MEM	36	4	4	0	1.93386	4.20157
PI 16:0;0-20:5;0	PI	GPL	MEM	36	5	5	0	NA	NA
PI 16:0;0-22:2;0	PI	GPL	MEM	38	2	2	0	NA	NA
PI 16:0;0-22:3;0	PI	GPL	MEM	38	3	3	0	NA	NA
PI 16:0;0-22:4;0	PI	GPL	MEM	38	4	4	0	NA	0.457907
PI 16:0;0-22:5;0	PI	GPL	MEM	38	5	5	0	NA	0.443576
PI 16:0;0-22:6;0	PI	GPL	MEM	38	6	6	0	NA	0.68603
PI 16:0;0-24:4;0	PI	GPL	MEM	40	4	4	0	NA	NA
PI 16:1;0-17:0;0	PI	GPL	MEM	33	1	1	0	NA	NA
PI 16:1;0-18:0;0	PI	GPL	MEM	34	1	1	0	0.82097	1.30198
PI 16:1;0-18:1;0	PI	GPL	MEM	34	2	2	0	0.518475	0.992849
PI 16:1;0-19:0;0	PI	GPL	MEM	35	1	1	0	NA	NA
PI 16:1;0-19:1;0	PI	GPL	MEM	35	2	2	0	NA	0.0159839
PI 16:1;0-20:0;0	PI	GPL	MEM	36	1	1	0	NA	0.0306446
PI 16:1;0-20:1;0	PI	GPL	MEM	36	2	2	0	NA	0.0987169
PI 16:1;0-20:2;0	PI	GPL	MEM	36	3	3	0	NA	NA
PI 16:1;0-20:4;0	PI	GPL	MEM	36	5	5	0	NA	0.223468
PI 16:1;0-22:5;0	PI	GPL	MEM	38	6	6	0	NA	NA
PI 17:0;0-17:0;0	PI	GPL	MEM	34	0	0	0	NA	NA
PI 17:0;0-17:1;0	PI	GPL	MEM	34	1	1	0	0.28944	0.287388
PI 17:0;0-18:1;0	PI	GPL	MEM	35	1	1	0	NA	0.160233
PI 17:0;0-18:2;0	PI	GPL	MEM	35	2	2	0	0.0257214	0.0192008
PI 17:0;0-20:1;0	PI	GPL	MEM	37	1	1	0	NA	NA
PI 17:0;0-20:2;0	PI	GPL	MEM	37	2	2	0	NA	0.0446931
PI 17:0;0-20:3;0	PI	GPL	MEM	37	3	3	0	NA	0.178449
PI 17:0;0-20:4;0	PI	GPL	MEM	37	4	4	0	0.233871	0.540917
PI 17:0;0-22:4;0	PI	GPL	MEM	39	4	4	0	NA	0.0695896
PI 17:0;0-22:5;0	PI	GPL	MEM	39	5	5	0	NA	NA
PI 17:1;0-17:1;0	PI	GPL	MEM	34	2	2	0	NA	0.0115707
PI 17:1;0-18:0;0	PI	GPL	MEM	35	1	1	0	NA	0.067755
PI 17:1;0-18:1;0	PI	GPL	MEM	35	2	2	0	0.140324	0.249911
PI 17:1;0-18:2;0	PI	GPL	MEM	35	3	3	0	NA	NA
PI 17:1;0-20:1;0	PI	GPL	MEM	37	2	2	0	NA	NA
PI 17:1;0-20:3;0	PI	GPL	MEM	37	4	4	0	NA	0.0915045
PI 18:0;0-18:1;0	PI	GPL	MEM	36	1	1	0	1.91136	5.48138
PI 18:0;0-18:2;0	PI	GPL	MEM	36	2	2	0	0.776072	1.76418
PI 18:0;0-18:3;0	PI	GPL	MEM	36	3	3	0	NA	NA
PI 18:0;0-19:1;0	PI	GPL	MEM	37	1	1	0	NA	NA
PI 18:0;0-19:2;0	PI	GPL	MEM	37	2	2	0	NA	0.155508
PI 18:0;0-19:3;0	PI	GPL	MEM	37	3	3	0	NA	NA
PI 18:0;0-20:1;0	PI	GPL	MEM	38	1	1	0	NA	NA
PI 18:0;0-20:2;0	PI	GPL	MEM	38	2	2	0	0.352498	0.818477
PI 18:0;0-20:3;0	PI	GPL	MEM	38	3	3	0	1.30072	3.18619
PI 18:0;0-20:4;0	PI	GPL	MEM	38	4	4	0	19.6579	60.1936
PI 18:0;0-20:5;0	PI	GPL	MEM	38	5	5	0	0.417981	0.901222
PI 18:0;0-21:3;0	PI	GPL	MEM	39	3	3	0	NA	NA
PI 18:0;0-22:3;0	PI	GPL	MEM	40	3	3	0	NA	NA
PI 18:0;0-22:4;0	PI	GPL	MEM	40	4	4	0	NA	7.79112
PI 18:0;0-22:5;0	PI	GPL	MEM	40	5	5	0	1.43506	1.9699
PI 18:0;0-22:6;0	PI	GPL	MEM	40	6	6	0	NA	2.14416
PI 18:0;0-24:6;0	PI	GPL	MEM	42	6	6	0	NA	NA
PI 18:1;0-18:1;0	PI	GPL	MEM	36	2	2	0	5.41716	11.3423
PI 18:1;0-18:2;0	PI	GPL	MEM	36	3	3	0	0.79124	1.37835
PI 18:1;0-19:0;0	PI	GPL	MEM	37	1	1	0	NA	NA
PI 18:1;0-19:1;0	PI	GPL	MEM	37	2	2	0	NA	0.0530145
PI 18:1;0-19:2;0	PI	GPL	MEM	37	3	3	0	NA	NA
PI 18:1;0-20:1;0	PI	GPL	MEM	38	2	2	0	0.137139	0.441502
PI 18:1;0-20:2;0	PI	GPL	MEM	38	3	3	0	0.10447	0.271416
PI 18:1;0-20:3;0	PI	GPL	MEM	38	4	4	0	0.890067	1.89738
PI 18:1;0-20:4;0	PI	GPL	MEM	38	5	5	0	2.13813	5.37945
PI 18:1;0-20:5;0	PI	GPL	MEM	38	6	6	0	NA	NA
PI 18:1;0-21:2;0	PI	GPL	MEM	39	3	3	0	NA	NA
PI 18:1;0-22:2;0	PI	GPL	MEM	40	3	3	0	NA	NA
PI 18:1;0-22:3;0	PI	GPL	MEM	40	4	4	0	NA	NA
PI 18:1;0-22:4;0	PI	GPL	MEM	40	5	5	0	NA	0.383238
PI 18:1;0-22:5;0	PI	GPL	MEM	40	6	6	0	NA	0.409589
PI 18:1;0-22:6;0	PI	GPL	MEM	40	7	7	0	NA	NA
PI 18:2;0-20:1;0	PI	GPL	MEM	38	3	3	0	NA	0.0348836
PI 18:2;0-20:2;0	PI	GPL	MEM	38	4	4	0	NA	NA
PI 18:2;0-20:4;0	PI	GPL	MEM	38	6	6	0	NA	NA
PI 19:0;0-20:4;0	PI	GPL	MEM	39	4	4	0	NA	0.163703
PI 19:1;0-20:2;0	PI	GPL	MEM	39	3	3	0	NA	NA
PI 19:1;0-20:3;0	PI	GPL	MEM	39	4	4	0	NA	NA
PI 19:1;0-20:4;0	PI	GPL	MEM	39	5	5	0	NA	NA
PI 20:0;0-20:4;0	PI	GPL	MEM	40	4	4	0	NA	0.261755
PI 20:1;0-20:2;0	PI	GPL	MEM	40	3	3	0	NA	NA
PI 20:1;0-20:3;0	PI	GPL	MEM	40	4	4	0	NA	NA
PI 20:1;0-20:4;0	PI	GPL	MEM	40	5	5	0	NA	0.235729
PI 20:2;0-20:2;0	PI	GPL	MEM	40	4	4	0	NA	NA
PI 20:2;0-20:4;0	PI	GPL	MEM	40	6	6	0	NA	NA
PI 20:3;0-20:4;0	PI	GPL	MEM	40	7	7	0	NA	NA
PS 14:0;0-18:0;0	PS	GPL	MEM	32	0	0	0	NA	NA
PS 14:0;0-18:1;0	PS	GPL	MEM	32	1	1	0	NA	0.0876374
PS 15:0;0-17:0;0	PS	GPL	MEM	32	0	0	0	NA	NA
PS 15:0;0-18:1;0	PS	GPL	MEM	33	1	1	0	NA	NA
PS 16:0;0-16:0;0	PS	GPL	MEM	32	0	0	0	NA	NA
PS 16:0;0-16:1;0	PS	GPL	MEM	32	1	1	0	NA	0.175331
PS 16:0;0-17:0;0	PS	GPL	MEM	33	0	0	0	NA	NA
PS 16:0;0-17:1;0	PS	GPL	MEM	33	1	1	0	NA	NA
PS 16:0;0-18:0;0	PS	GPL	MEM	34	0	0	0	NA	NA
PS 16:0;0-18:1;0	PS	GPL	MEM	34	1	1	0	1.47283	4.26852
PS 16:0;0-18:2;0	PS	GPL	MEM	34	2	2	0	NA	0.174046
PS 16:0;0-19:1;0	PS	GPL	MEM	35	1	1	0	NA	0.0449999
PS 16:0;0-20:1;0	PS	GPL	MEM	36	1	1	0	0.149339	0.332307
PS 16:0;0-20:2;0	PS	GPL	MEM	36	2	2	0	NA	NA
PS 16:0;0-20:3;0	PS	GPL	MEM	36	3	3	0	NA	NA
PS 16:0;0-20:4;0	PS	GPL	MEM	36	4	4	0	NA	NA
PS 16:0;0-22:1;0	PS	GPL	MEM	38	1	1	0	NA	0.134598
PS 16:0;0-22:4;0	PS	GPL	MEM	38	4	4	0	NA	NA
PS 16:0;0-22:5;0	PS	GPL	MEM	38	5	5	0	NA	NA
PS 16:0;0-24:0;0	PS	GPL	MEM	40	0	0	0	NA	NA
PS 16:0;0-24:1;0	PS	GPL	MEM	40	1	1	0	NA	NA
PS 16:1;0-17:0;0	PS	GPL	MEM	33	1	1	0	NA	NA
PS 16:1;0-18:0;0	PS	GPL	MEM	34	1	1	0	0.69574	1.79609
PS 16:1;0-18:1;0	PS	GPL	MEM	34	2	2	0	NA	0.225562
PS 16:1;0-20:1;0	PS	GPL	MEM	36	2	2	0	NA	0.0739029
PS 16:1;0-22:0;0	PS	GPL	MEM	38	1	1	0	NA	0.0737551
PS 16:1;0-22:1;0	PS	GPL	MEM	38	2	2	0	NA	0.0992487
PS 16:1;0-22:4;0	PS	GPL	MEM	38	5	5	0	NA	NA
PS 16:1;0-24:0;0	PS	GPL	MEM	40	1	1	0	0.0764512	0.199462
PS 16:1;0-24:1;0	PS	GPL	MEM	40	2	2	0	NA	0.249874
PS 17:0;0-17:1;0	PS	GPL	MEM	34	1	1	0	NA	0.19781
PS 17:0;0-18:0;0	PS	GPL	MEM	35	0	0	0	NA	NA
PS 17:0;0-18:1;0	PS	GPL	MEM	35	1	1	0	0.272707	1.10988
PS 17:0;0-18:2;0	PS	GPL	MEM	35	2	2	0	NA	NA
PS 17:0;0-20:1;0	PS	GPL	MEM	37	1	1	0	NA	0.0802221
PS 17:0;0-20:2;0	PS	GPL	MEM	37	2	2	0	NA	0.044032
PS 17:0;0-20:4;0	PS	GPL	MEM	37	4	4	0	NA	NA
PS 17:0;0-22:4;0	PS	GPL	MEM	39	4	4	0	NA	NA
PS 17:0;0-22:5;0	PS	GPL	MEM	39	5	5	0	NA	NA
PS 17:1;0-17:1;0	PS	GPL	MEM	34	2	2	0	NA	0.0131899
PS 17:1;0-18:0;0	PS	GPL	MEM	35	1	1	0	0.114596	0.15919
PS 17:1;0-18:1;0	PS	GPL	MEM	35	2	2	0	NA	NA
PS 17:1;0-22:4;0	PS	GPL	MEM	39	5	5	0	NA	NA
PS 17:1;0-22:5;0	PS	GPL	MEM	39	6	6	0	NA	NA
PS 18:0;0-18:1;0	PS	GPL	MEM	36	1	1	0	17.273	55.8717
PS 18:0;0-18:2;0	PS	GPL	MEM	36	2	2	0	0.978461	2.56991
PS 18:0;0-18:3;0	PS	GPL	MEM	36	3	3	0	NA	NA
PS 18:0;0-19:0;0	PS	GPL	MEM	37	0	0	0	NA	NA
PS 18:0;0-19:1;0	PS	GPL	MEM	37	1	1	0	0.230606	0.648722
PS 18:0;0-19:2;0	PS	GPL	MEM	37	2	2	0	NA	NA
PS 18:0;0-20:0;0	PS	GPL	MEM	38	0	0	0	NA	0.72048
PS 18:0;0-20:1;0	PS	GPL	MEM	38	1	1	0	0.359706	1.21847
PS 18:0;0-20:2;0	PS	GPL	MEM	38	2	2	0	0.351383	0.694308
PS 18:0;0-20:3;0	PS	GPL	MEM	38	3	3	0	0.821157	2.84487
PS 18:0;0-20:4;0	PS	GPL	MEM	38	4	4	0	NA	NA
PS 18:0;0-20:5;0	PS	GPL	MEM	38	5	5	0	NA	NA
PS 18:0;0-22:0;0	PS	GPL	MEM	40	0	0	0	NA	1.11755
PS 18:0;0-22:1;0	PS	GPL	MEM	40	1	1	0	NA	0.241438
PS 18:0;0-22:2;0	PS	GPL	MEM	40	2	2	0	NA	NA
PS 18:0;0-22:3;0	PS	GPL	MEM	40	3	3	0	NA	0.356357
PS 18:0;0-22:4;0	PS	GPL	MEM	40	4	4	0	1.01835	4.28436
PS 18:0;0-22:5;0	PS	GPL	MEM	40	5	5	0	1.34705	5.79869
PS 18:0;0-22:6;0	PS	GPL	MEM	40	6	6	0	NA	5.62729
PS 18:0;0-24:1;0	PS	GPL	MEM	42	1	1	0	NA	0.152619
PS 18:0;0-24:4;0	PS	GPL	MEM	42	4	4	0	NA	NA
PS 18:1;0-18:1;0	PS	GPL	MEM	36	2	2	0	2.07825	5.98099
PS 18:1;0-18:2;0	PS	GPL	MEM	36	3	3	0	NA	0.500364
PS 18:1;0-19:0;0	PS	GPL	MEM	37	1	1	0	0.217818	0.664691
PS 18:1;0-19:1;0	PS	GPL	MEM	37	2	2	0	NA	0.256609
PS 18:1;0-20:0;0	PS	GPL	MEM	38	1	1	0	0.261807	0.699421
PS 18:1;0-20:1;0	PS	GPL	MEM	38	2	2	0	0.247329	1.12762
PS 18:1;0-20:2;0	PS	GPL	MEM	38	3	3	0	NA	NA
PS 18:1;0-20:3;0	PS	GPL	MEM	38	4	4	0	NA	NA
PS 18:1;0-20:4;0	PS	GPL	MEM	38	5	5	0	NA	NA
PS 18:1;0-21:0;0	PS	GPL	MEM	39	1	1	0	NA	0.440202
PS 18:1;0-22:0;0	PS	GPL	MEM	40	1	1	0	0.610922	1.79008
PS 18:1;0-22:1;0	PS	GPL	MEM	40	2	2	0	0.792342	2.47055
PS 18:1;0-22:2;0	PS	GPL	MEM	40	3	3	0	NA	0.0499441
PS 18:1;0-22:4;0	PS	GPL	MEM	40	5	5	0	NA	NA
PS 18:1;0-22:5;0	PS	GPL	MEM	40	6	6	0	NA	NA
PS 18:1;0-22:6;0	PS	GPL	MEM	40	7	7	0	NA	NA
PS 18:1;0-24:0;0	PS	GPL	MEM	42	1	1	0	0.996844	2.24843
PS 18:1;0-24:1;0	PS	GPL	MEM	42	2	2	0	1.03694	3.27752
PS 18:1;0-24:2;0	PS	GPL	MEM	42	3	3	0	0.327075	0.908953
PS 18:2;0-18:2;0	PS	GPL	MEM	36	4	4	0	NA	NA
PS 18:2;0-20:0;0	PS	GPL	MEM	38	2	2	0	NA	NA
PS 18:2;0-20:1;0	PS	GPL	MEM	38	3	3	0	NA	NA
PS 18:2;0-20:2;0	PS	GPL	MEM	38	4	4	0	NA	NA
PS 18:2;0-20:3;0	PS	GPL	MEM	38	5	5	0	NA	NA
PS 18:2;0-20:4;0	PS	GPL	MEM	38	6	6	0	NA	NA
PS 18:2;0-22:4;0	PS	GPL	MEM	40	6	6	0	NA	NA
PS 18:2;0-22:5;0	PS	GPL	MEM	40	7	7	0	NA	NA
PS 18:2;0-22:6;0	PS	GPL	MEM	40	8	8	0	NA	NA
PS 18:2;0-24:0;0	PS	GPL	MEM	42	2	2	0	NA	NA
PS 19:0;0-20:3;0	PS	GPL	MEM	39	3	3	0	NA	NA
PS 19:0;0-20:4;0	PS	GPL	MEM	39	4	4	0	NA	NA
PS 19:0;0-22:4;0	PS	GPL	MEM	41	4	4	0	NA	NA
PS 19:0;0-22:5;0	PS	GPL	MEM	41	5	5	0	NA	NA
PS 19:0;0-22:6;0	PS	GPL	MEM	41	6	6	0	NA	NA
PS 20:0;0-20:4;0	PS	GPL	MEM	40	4	4	0	NA	NA
PS 20:1;0-20:1;0	PS	GPL	MEM	40	2	2	0	NA	NA
PS 20:1;0-20:4;0	PS	GPL	MEM	40	5	5	0	NA	NA
PS 20:2;0-20:4;0	PS	GPL	MEM	40	6	6	0	NA	NA
PS 20:3;0-20:3;0	PS	GPL	MEM	40	6	6	0	NA	NA
PS 20:3;0-20:4;0	PS	GPL	MEM	40	7	7	0	NA	NA
PS 20:3;0-24:1;0	PS	GPL	MEM	44	4	4	0	NA	NA
PS 20:4;0-20:4;0	PS	GPL	MEM	40	8	8	0	NA	NA
PS 20:4;0-22:0;0	PS	GPL	MEM	42	4	4	0	NA	NA
PS 20:4;0-22:5;0	PS	GPL	MEM	42	9	9	0	NA	NA
PS 20:4;0-22:6;0	PS	GPL	MEM	42	10	10	0	NA	NA
SM 32:1;2	SM	SL	MEM	32	1	0	2	1.31719	4.14593
SM 32:2;2	SM	SL	MEM	32	2	1	2	NA	NA
SM 34:0;2	SM	SL	MEM	34	0	0	2	1.16191	3.90417
SM 34:1;2	SM	SL	MEM	34	1	0	2	53.5698	147.618
SM 34:1;3	SM	SL	MEM	34	1	0	3	0.546831	1.15389
SM 34:2;2	SM	SL	MEM	34	2	1	2	1.97713	4.97238
SM 36:0;2	SM	SL	MEM	36	0	0	2	NA	NA
SM 36:1;2	SM	SL	MEM	36	1	0	2	0.705592	2.18266
SM 36:2;2	SM	SL	MEM	36	2	1	2	NA	0.611521
SM 38:0;2	SM	SL	MEM	38	0	0	2	NA	NA
SM 38:0;4	SM	SL	MEM	38	0	0	4	NA	NA
SM 38:1;2	SM	SL	MEM	38	1	0	2	NA	0.633703
SM 38:2;2	SM	SL	MEM	38	2	1	2	NA	NA
SM 40:0;2	SM	SL	MEM	40	0	0	2	NA	NA
SM 40:1;2	SM	SL	MEM	40	1	0	2	1.77881	4.97569
SM 40:2;2	SM	SL	MEM	40	2	1	2	0.742462	2.00361
SM 42:0;2	SM	SL	MEM	42	0	0	2	NA	NA
SM 42:1;2	SM	SL	MEM	42	1	0	2	NA	7.19398
SM 42:1;3	SM	SL	MEM	42	1	0	3	NA	NA
SM 42:2;2	SM	SL	MEM	42	2	1	2	14.1667	40.8838
SM 42:2;3	SM	SL	MEM	42	2	1	3	NA	NA
SM 44:2;2	SM	SL	MEM	44	2	1	2	NA	NA
TAG 34:0;0	TAG	GL	STO	34	0	0	0	NA	NA
TAG 36:0;0	TAG	GL	STO	36	0	0	0	NA	NA
TAG 42:1;0	TAG	GL	STO	42	1	1	0	NA	NA
TAG 43:0;0	TAG	GL	STO	43	0	0	0	NA	NA
TAG 44:1;0	TAG	GL	STO	44	1	1	0	NA	NA
TAG 48:0;0	TAG	GL	STO	48	0	0	0	NA	NA
TAG 50:0;0	TAG	GL	STO	50	0	0	0	NA	NA
TAG 50:1;0	TAG	GL	STO	50	1	1	0	NA	NA
TAG 50:2;0	TAG	GL	STO	50	2	2	0	NA	NA
TAG 50:4;0	TAG	GL	STO	50	4	4	0	NA	NA
TAG 50:5;0	TAG	GL	STO	50	5	5	0	NA	NA
TAG 50:6;0	TAG	GL	STO	50	6	6	0	NA	NA
TAG 51:1;0	TAG	GL	STO	51	1	1	0	NA	NA
TAG 51:4;0	TAG	GL	STO	51	4	4	0	NA	NA
TAG 52:1;0	TAG	GL	STO	52	1	1	0	NA	NA
TAG 52:2;0	TAG	GL	STO	52	2	2	0	NA	NA
TAG 52:3;0	TAG	GL	STO	52	3	3	0	NA	NA
TAG 52:4;0	TAG	GL	STO	52	4	4	0	NA	NA
TAG 52:5;0	TAG	GL	STO	52	5	5	0	NA	NA
TAG 52:6;0	TAG	GL	STO	52	6	6	0	NA	NA
TAG 52:7;0	TAG	GL	STO	52	7	7	0	NA	NA
TAG 53:1;0	TAG	GL	STO	53	1	1	0	NA	NA
TAG 53:2;0	TAG	GL	STO	53	2	2	0	NA	NA
TAG 53:3;0	TAG	GL	STO	53	3	3	0	NA	NA
TAG 53:4;0	TAG	GL	STO	53	4	4	0	NA	NA
TAG 53:5;0	TAG	GL	STO	53	5	5	0	NA	NA
TAG 54:1;0	TAG	GL	STO	54	1	1	0	NA	NA
TAG 54:2;0	TAG	GL	STO	54	2	2	0	NA	NA
TAG 54:3;0	TAG	GL	STO	54	3	3	0	NA	NA
TAG 54:4;0	TAG	GL	STO	54	4	4	0	NA	NA
TAG 54:5;0	TAG	GL	STO	54	5	5	0	NA	NA
TAG 54:6;0	TAG	GL	STO	54	6	6	0	NA	NA
TAG 54:7;0	TAG	GL	STO	54	7	7	0	NA	NA
TAG 55:2;0	TAG	GL	STO	55	2	2	0	NA	NA
TAG 55:3;0	TAG	GL	STO	55	3	3	0	NA	NA
TAG 55:4;0	TAG	GL	STO	55	4	4	0	NA	NA
TAG 55:5;0	TAG	GL	STO	55	5	5	0	NA	NA
TAG 55:6;0	TAG	GL	STO	55	6	6	0	NA	NA
TAG 56:1;0	TAG	GL	STO	56	1	1	0	NA	NA
TAG 56:2;0	TAG	GL	STO	56	2	2	0	NA	NA
TAG 56:3;0	TAG	GL	STO	56	3	3	0	NA	NA
TAG 56:4;0	TAG	GL	STO	56	4	4	0	NA	NA
TAG 56:5;0	TAG	GL	STO	56	5	5	0	NA	NA
TAG 56:6;0	TAG	GL	STO	56	6	6	0	NA	NA
TAG 56:7;0	TAG	GL	STO	56	7	7	0	NA	NA
TAG 56:8;0	TAG	GL	STO	56	8	8	0	NA	NA
TAG 56:9;0	TAG	GL	STO	56	9	9	0	NA	NA
TAG 57:4;0	TAG	GL	STO	57	4	4	0	NA	NA
TAG 57:5;0	TAG	GL	STO	57	5	5	0	NA	NA
TAG 57:6;0	TAG	GL	STO	57	6	6	0	NA	NA
TAG 58:1;0	TAG	GL	STO	58	1	1	0	NA	NA
TAG 58:10;0	TAG	GL	STO	58	10	10	0	NA	NA
TAG 58:2;0	TAG	GL	STO	58	2	2	0	NA	NA
TAG 58:3;0	TAG	GL	STO	58	3	3	0	NA	NA
TAG 58:4;0	TAG	GL	STO	58	4	4	0	NA	NA
TAG 58:5;0	TAG	GL	STO	58	5	5	0	NA	NA
TAG 58:6;0	TAG	GL	STO	58	6	6	0	NA	NA
TAG 58:7;0	TAG	GL	STO	58	7	7	0	NA	NA
TAG 58:8;0	TAG	GL	STO	58	8	8	0	NA	NA
TAG 58:9;0	TAG	GL	STO	58	9	9	0	NA	NA
TAG 60:10;0	TAG	GL	STO	60	10	10	0	NA	NA
TAG 60:11;0	TAG	GL	STO	60	11	11	0	NA	NA
TAG 60:12;0	TAG	GL	STO	60	12	12	0	NA	NA
TAG 60:4;0	TAG	GL	STO	60	4	4	0	NA	NA
TAG 60:5;0	TAG	GL	STO	60	5	5	0	NA	NA
TAG 60:6;0	TAG	GL	STO	60	6	6	0	NA	NA
TAG 60:7;0	TAG	GL	STO	60	7	7	0	NA	NA
TAG 60:8;0	TAG	GL	STO	60	8	8	0	NA	NA
TAG 60:9;0	TAG	GL	STO	60	9	9	0	NA	NA
TAG 62:11;0	TAG	GL	STO	62	11	11	0	NA	NA
TAG 62:12;0	TAG	GL	STO	62	12	12	0	NA	NA
TAG 62:13;0	TAG	GL	STO	62	13	13	0	NA	NA
						0		832.934	2306.87

## Sheet: CHO - 20190615
feature	class	structuralcategory	functio0lcategory	totallength	totaldb	dbcorr	totaloh	CHO5
								CHO5
pM of lipids								WTCHO
Chol	Chol	ST	MEM	27	1	1	0	419.642
CE 14:0;0	CE	STE	STO	14	0	0	0	5.01774
CE 16:0;0	CE	STE	STO	16	0	0	0	13.1644
CE 16:1;0	CE	STE	STO	16	1	1	0	8.13885
CE 17:0;0	CE	STE	STO	17	0	0	0	0
CE 17:1;0	CE	STE	STO	17	1	1	0	0
CE 18:0;0	CE	STE	STO	18	0	0	0	3.84315
CE 18:1;0	CE	STE	STO	18	1	1	0	56.949
CE 18:2;0	CE	STE	STO	18	2	2	0	4.12693
CE 20:1;0	CE	STE	STO	20	1	1	0	5.52305
CE 20:2;0	CE	STE	STO	20	2	2	0	0
CE 20:3;0	CE	STE	STO	20	3	3	0	0
CE 20:4;0	CE	STE	STO	20	4	4	0	0
CE 22:5;0	CE	STE	STO	22	5	5	0	0
CE 22:6;0	CE	STE	STO	22	6	6	0	0
CE 24:1;0	CE	STE	STO	24	1	1	0	0
CE 24:6;0	CE	STE	STO	24	6	6	0	0
Cer 32:0;3	Cer	SL	MEM	32	0	0	3	0
Cer 32:1;2	Cer	SL	MEM	32	1	0	2	0
Cer 34:0;2	Cer	SL	MEM	34	0	0	2	0
Cer 34:0;3	Cer	SL	MEM	34	0	0	3	0
Cer 34:1;2	Cer	SL	MEM	34	1	0	2	2.25684
Cer 34:1;3	Cer	SL	MEM	34	1	0	3	0
Cer 34:2;2	Cer	SL	MEM	34	2	1	2	0.135745
Cer 36:0;2	Cer	SL	MEM	36	0	0	2	0
Cer 36:1;2	Cer	SL	MEM	36	1	0	2	0.266071
Cer 36:2;2	Cer	SL	MEM	36	2	1	2	0
Cer 38:0;2	Cer	SL	MEM	38	0	0	2	0
Cer 38:1;2	Cer	SL	MEM	38	1	0	2	0
Cer 38:2;2	Cer	SL	MEM	38	2	1	2	0
Cer 40:0;2	Cer	SL	MEM	40	0	0	2	0
Cer 40:1;2	Cer	SL	MEM	40	1	0	2	0.329648
Cer 40:2;2	Cer	SL	MEM	40	2	1	2	0
Cer 42:0;2	Cer	SL	MEM	42	0	0	2	0
Cer 42:1;2	Cer	SL	MEM	42	1	0	2	1.26563
Cer 42:2;2	Cer	SL	MEM	42	2	1	2	1.56736
Cer 44:1;2	Cer	SL	MEM	44	1	0	2	0
Cer 44:2;2	Cer	SL	MEM	44	2	1	2	0
CL 66:0;0	CL	GPL	MEM	66	0	0	0	0
CL 66:4;0	CL	GPL	MEM	66	4	4	0	0
CL 68:2;0	CL	GPL	MEM	68	2	2	0	0
CL 68:3;0	CL	GPL	MEM	68	3	3	0	0
CL 68:4;0	CL	GPL	MEM	68	4	4	0	0
CL 68:5;0	CL	GPL	MEM	68	5	5	0	0
CL 70:4;0	CL	GPL	MEM	70	4	4	0	0
CL 70:5;0	CL	GPL	MEM	70	5	5	0	0
CL 70:6;0	CL	GPL	MEM	70	6	6	0	0
CL 72:2;0	CL	GPL	MEM	72	2	2	0	0
CL 72:4;0	CL	GPL	MEM	72	4	4	0	0
CL 72:6;0	CL	GPL	MEM	72	6	6	0	0
CL 72:7;0	CL	GPL	MEM	72	7	7	0	0
DAG 14:0;0_16:0;0	DAG	GL	MEM	30	0	0	0	0
DAG 14:0;0_17:0;0	DAG	GL	MEM	31	0	0	0	0
DAG 14:0;0_18:0;0	DAG	GL	MEM	32	0	0	0	0
DAG 14:0;0_18:1;0	DAG	GL	MEM	32	1	1	0	0
DAG 14:0;0_20:1;0	DAG	GL	MEM	34	1	1	0	0
DAG 14:0;0_20:2;0	DAG	GL	MEM	34	2	2	0	0
DAG 15:0;0_15:0;0	DAG	GL	MEM	30	0	0	0	0
DAG 15:0;0_16:0;0	DAG	GL	MEM	31	0	0	0	0
DAG 15:0;0_17:0;0	DAG	GL	MEM	32	0	0	0	0
DAG 15:0;0_17:1;0	DAG	GL	MEM	32	1	1	0	0
DAG 15:0;0_18:0;0	DAG	GL	MEM	33	0	0	0	0
DAG 15:0;0_18:1;0	DAG	GL	MEM	33	1	1	0	0
DAG 16:0;0_16:0;0	DAG	GL	MEM	32	0	0	0	0
DAG 16:0;0_16:1;0	DAG	GL	MEM	32	1	1	0	0
DAG 16:0;0_17:0;0	DAG	GL	MEM	33	0	0	0	0
DAG 16:0;0_17:1;0	DAG	GL	MEM	33	1	1	0	0
DAG 16:0;0_18:1;0	DAG	GL	MEM	34	1	1	0	3.86671
DAG 16:0;0_18:2;0	DAG	GL	MEM	34	2	2	0	0
DAG 16:0;0_19:1;0	DAG	GL	MEM	35	1	1	0	0
DAG 16:0;0_20:1;0	DAG	GL	MEM	36	1	1	0	0.186838
DAG 16:0;0_20:2;0	DAG	GL	MEM	36	2	2	0	0
DAG 16:0;0_20:3;0	DAG	GL	MEM	36	3	3	0	0
DAG 16:0;0_22:4;0	DAG	GL	MEM	38	4	4	0	0
DAG 16:0;0_22:6;0	DAG	GL	MEM	38	6	6	0	0
DAG 16:1;0_17:0;0	DAG	GL	MEM	33	1	1	0	0
DAG 16:1;0_18:0;0	DAG	GL	MEM	34	1	1	0	0
DAG 16:1;0_18:1;0	DAG	GL	MEM	34	2	2	0	0
DAG 16:1;0_20:1;0	DAG	GL	MEM	36	2	2	0	0
DAG 17:0;0_18:1;0	DAG	GL	MEM	35	1	1	0	0
DAG 18:0;0_18:1;0	DAG	GL	MEM	36	1	1	0	1.70018
DAG 18:0;0_18:2;0	DAG	GL	MEM	36	2	2	0	0
DAG 18:0;0_20:1;0	DAG	GL	MEM	38	1	1	0	0
DAG 18:0;0_20:2;0	DAG	GL	MEM	38	2	2	0	0
DAG 18:0;0_20:4;0	DAG	GL	MEM	38	4	4	0	0
DAG 18:1;0_18:1;0	DAG	GL	MEM	36	2	2	0	2.86708
DAG 18:1;0_18:2;0	DAG	GL	MEM	36	3	3	0	0
DAG 18:1;0_20:1;0	DAG	GL	MEM	38	2	2	0	0
DAG 18:1;0_20:3;0	DAG	GL	MEM	38	4	4	0	0
HexCer 34:1;2	HexCer	SL	MEM	34	1	0	2	1.09573
HexCer 36:1;2	HexCer	SL	MEM	36	1	0	2	0
HexCer 38:1;2	HexCer	SL	MEM	38	1	0	2	0
HexCer 40:1;2	HexCer	SL	MEM	40	1	0	2	0
HexCer 40:2;2	HexCer	SL	MEM	40	2	1	2	0
HexCer 42:1;2	HexCer	SL	MEM	42	1	0	2	1.4409
HexCer 42:1;3	HexCer	SL	MEM	42	1	0	3	0
HexCer 42:2;2	HexCer	SL	MEM	42	2	1	2	0.7587
LPA 16:0;0	LPA	GPL	LYS	16	0	0	0	0
LPA 20:4;0	LPA	GPL	LYS	20	4	4	0	0
LPC 16:0;0	LPC	GPL	LYS	16	0	0	0	0.712117
LPC 16:1;0	LPC	GPL	LYS	16	1	1	0	0
LPC 18:0;0	LPC	GPL	LYS	18	0	0	0	0
LPC 18:1;0	LPC	GPL	LYS	18	1	1	0	0
LPC 18:2;0	LPC	GPL	LYS	18	2	2	0	0
LPC 20:4;0	LPC	GPL	LYS	20	4	4	0	0
LPC 22:4;0	LPC	GPL	LYS	22	4	4	0	0
LPC 22:5;0	LPC	GPL	LYS	22	5	5	0	0
LPC 22:6;0	LPC	GPL	LYS	22	6	6	0	0
LPC O-16:0;0	LPC O-	GPL	LYS	16	0	0	0	0
LPC O-16:1;0	LPC O-	GPL	LYS	16	1	1	0	0
LPC O-18:0;0	LPC O-	GPL	LYS	18	0	0	0	0
LPC O-18:1;0	LPC O-	GPL	LYS	18	1	1	0	0
LPE 16:0;0	LPE	GPL	LYS	16	0	0	0	0
LPE 18:0;0	LPE	GPL	LYS	18	0	0	0	0.195295
LPE 18:1;0	LPE	GPL	LYS	18	1	1	0	0.354285
LPE 18:2;0	LPE	GPL	LYS	18	2	2	0	0
LPE 20:1;0	LPE	GPL	LYS	20	1	1	0	0
LPE 20:2;0	LPE	GPL	LYS	20	2	2	0	0
LPE 20:3;0	LPE	GPL	LYS	20	3	3	0	0
LPE 20:4;0	LPE	GPL	LYS	20	4	4	0	0.282293
LPE 20:5;0	LPE	GPL	LYS	20	5	5	0	0
LPE 22:1;0	LPE	GPL	LYS	22	1	1	0	0
LPE 22:3;0	LPE	GPL	LYS	22	3	3	0	0
LPE 24:0;0	LPE	GPL	LYS	24	0	0	0	0
LPE 24:4;0	LPE	GPL	LYS	24	4	4	0	0
LPE 24:5;0	LPE	GPL	LYS	24	5	5	0	0
LPE 24:6;0	LPE	GPL	LYS	24	6	6	0	0
LPE O-16:0;0	LPE O-	GPL	LYS	16	0	0	0	0
LPE O-16:1;0	LPE O-	GPL	LYS	16	1	1	0	0.128823
LPE O-18:0;0	LPE O-	GPL	LYS	18	0	0	0	0
LPE O-18:1;0	LPE O-	GPL	LYS	18	1	1	0	0
LPG 18:1;0	LPG	GPL	LYS	18	1	1	0	0
LPG 22:6;0	LPG	GPL	LYS	22	6	6	0	0
LPI 16:0;0	LPI	GPL	LYS	16	0	0	0	0
LPI 18:0;0	LPI	GPL	LYS	18	0	0	0	0
LPI 18:1;0	LPI	GPL	LYS	18	1	1	0	0
LPS 12:0;0	LPS	GPL	LYS	12	0	0	0	0
LPS 18:0;0	LPS	GPL	LYS	18	0	0	0	0
LPS 18:1;0	LPS	GPL	LYS	18	1	1	0	0
PA 14:0;0_16:0;0	PA	GPL	MEM	30	0	0	0	0
PA 16:0;0_16:0;0	PA	GPL	MEM	32	0	0	0	0
PA 16:0;0_18:0;0	PA	GPL	MEM	34	0	0	0	0
PA 16:0;0_18:1;0	PA	GPL	MEM	34	1	1	0	0
PA 16:1;0_18:0;0	PA	GPL	MEM	34	1	1	0	0
PC 12:0;0_16:0;0	PC	GPL	MEM	28	0	0	0	0
PC 12:0;0_18:0;0	PC	GPL	MEM	30	0	0	0	0
PC 13:0;0_15:0;0	PC	GPL	MEM	28	0	0	0	0
PC 13:0;0_16:0;0	PC	GPL	MEM	29	0	0	0	0
PC 13:0;0_18:1;0	PC	GPL	MEM	31	1	1	0	0
PC 14:0;0_14:0;0	PC	GPL	MEM	28	0	0	0	0
PC 14:0;0_15:0;0	PC	GPL	MEM	29	0	0	0	0
PC 14:0;0_16:0;0	PC	GPL	MEM	30	0	0	0	4.99376
PC 14:0;0_16:2;0	PC	GPL	MEM	30	2	2	0	0
PC 14:0;0_17:0;0	PC	GPL	MEM	31	0	0	0	0
PC 14:0;0_17:1;0	PC	GPL	MEM	31	1	1	0	0.481839
PC 14:0;0_18:0;0	PC	GPL	MEM	32	0	0	0	1.6968
PC 14:0;0_18:1;0	PC	GPL	MEM	32	1	1	0	10.0742
PC 14:0;0_18:2;0	PC	GPL	MEM	32	2	2	0	15.1757
PC 14:0;0_19:0;0	PC	GPL	MEM	33	0	0	0	0
PC 14:0;0_19:1;0	PC	GPL	MEM	33	1	1	0	0
PC 14:0;0_20:0;0	PC	GPL	MEM	34	0	0	0	0
PC 14:0;0_20:1;0	PC	GPL	MEM	34	1	1	0	0.581567
PC 14:0;0_20:2;0	PC	GPL	MEM	34	2	2	0	0.211708
PC 14:0;0_20:3;0	PC	GPL	MEM	34	3	3	0	0.188362
PC 14:0;0_20:4;0	PC	GPL	MEM	34	4	4	0	3.72567
PC 14:0;0_22:4;0	PC	GPL	MEM	36	4	4	0	0
PC 14:0;0_22:5;0	PC	GPL	MEM	36	5	5	0	0
PC 14:0;0_22:6;0	PC	GPL	MEM	36	6	6	0	0
PC 14:0;0_24:1;0	PC	GPL	MEM	38	1	1	0	0
PC 14:1;0_16:1;0	PC	GPL	MEM	30	2	2	0	0
PC 14:1;0_17:0;0	PC	GPL	MEM	31	1	1	0	0
PC 14:1;0_18:0;0	PC	GPL	MEM	32	1	1	0	0
PC 14:1;0_18:1;0	PC	GPL	MEM	32	2	2	0	0
PC 15:0;0_15:0;0	PC	GPL	MEM	30	0	0	0	0.0607144
PC 15:0;0_16:0;0	PC	GPL	MEM	31	0	0	0	0
PC 15:0;0_16:1;0	PC	GPL	MEM	31	1	1	0	1.33779
PC 15:0;0_16:2;0	PC	GPL	MEM	31	2	2	0	0
PC 15:0;0_17:0;0	PC	GPL	MEM	32	0	0	0	0.197437
PC 15:0;0_17:1;0	PC	GPL	MEM	32	1	1	0	0.461475
PC 15:0;0_18:0;0	PC	GPL	MEM	33	0	0	0	0.181897
PC 15:0;0_18:1;0	PC	GPL	MEM	33	1	1	0	5.04862
PC 15:0;0_18:2;0	PC	GPL	MEM	33	2	2	0	0
PC 15:0;0_19:0;0	PC	GPL	MEM	34	0	0	0	0
PC 15:0;0_19:1;0	PC	GPL	MEM	34	1	1	0	0
PC 15:0;0_20:1;0	PC	GPL	MEM	35	1	1	0	0
PC 15:0;0_20:2;0	PC	GPL	MEM	35	2	2	0	0
PC 15:0;0_20:3;0	PC	GPL	MEM	35	3	3	0	0
PC 15:0;0_20:4;0	PC	GPL	MEM	35	4	4	0	0
PC 15:0;0_20:5;0	PC	GPL	MEM	35	5	5	0	0
PC 15:0;0_22:5;0	PC	GPL	MEM	37	5	5	0	0
PC 15:0;0_22:6;0	PC	GPL	MEM	37	6	6	0	0
PC 15:1;0_16:0;0	PC	GPL	MEM	31	1	1	0	0
PC 15:1;0_18:0;0	PC	GPL	MEM	33	1	1	0	0
PC 15:1;0_18:1;0	PC	GPL	MEM	33	2	2	0	1.61012
PC 16:0;0_16:0;0	PC	GPL	MEM	32	0	0	0	7.0584
PC 16:0;0_16:1;0	PC	GPL	MEM	32	1	1	0	23.9795
PC 16:0;0_16:2;0	PC	GPL	MEM	32	2	2	0	2.6059
PC 16:0;0_17:0;0	PC	GPL	MEM	33	0	0	0	0
PC 16:0;0_17:1;0	PC	GPL	MEM	33	1	1	0	4.09068
PC 16:0;0_17:2;0	PC	GPL	MEM	33	2	2	0	0
PC 16:0;0_18:0;0	PC	GPL	MEM	34	0	0	0	0
PC 16:0;0_18:1;0	PC	GPL	MEM	34	1	1	0	123.861
PC 16:0;0_18:2;0	PC	GPL	MEM	34	2	2	0	11.7378
PC 16:0;0_18:3;0	PC	GPL	MEM	34	3	3	0	0.662276
PC 16:0;0_19:0;0	PC	GPL	MEM	35	0	0	0	0
PC 16:0;0_19:1;0	PC	GPL	MEM	35	1	1	0	0.816188
PC 16:0;0_19:2;0	PC	GPL	MEM	35	2	2	0	0
PC 16:0;0_20:0;0	PC	GPL	MEM	36	0	0	0	0
PC 16:0;0_20:1;0	PC	GPL	MEM	36	1	1	0	2.90548
PC 16:0;0_20:2;0	PC	GPL	MEM	36	2	2	0	1.06131
PC 16:0;0_20:3;0	PC	GPL	MEM	36	3	3	0	2.14857
PC 16:0;0_20:4;0	PC	GPL	MEM	36	4	4	0	4.06238
PC 16:0;0_20:5;0	PC	GPL	MEM	36	5	5	0	0
PC 16:0;0_21:1;0	PC	GPL	MEM	37	1	1	0	0
PC 16:0;0_21:3;0	PC	GPL	MEM	37	3	3	0	0
PC 16:0;0_22:1;0	PC	GPL	MEM	38	1	1	0	0
PC 16:0;0_22:2;0	PC	GPL	MEM	38	2	2	0	0
PC 16:0;0_22:3;0	PC	GPL	MEM	38	3	3	0	0
PC 16:0;0_22:4;0	PC	GPL	MEM	38	4	4	0	0.950683
PC 16:0;0_22:5;0	PC	GPL	MEM	38	5	5	0	1.81552
PC 16:0;0_22:6;0	PC	GPL	MEM	38	6	6	0	2.19101
PC 16:0;0_24:1;0	PC	GPL	MEM	40	1	1	0	0
PC 16:0;0_24:2;0	PC	GPL	MEM	40	2	2	0	0
PC 16:0;0_24:4;0	PC	GPL	MEM	40	4	4	0	0
PC 16:0;0_24:5;0	PC	GPL	MEM	40	5	5	0	0
PC 16:0;0_24:6;0	PC	GPL	MEM	40	6	6	0	0
PC 16:1;0_16:1;0	PC	GPL	MEM	32	2	2	0	17.7039
PC 16:1;0_16:2;0	PC	GPL	MEM	32	3	3	0	0
PC 16:1;0_17:0;0	PC	GPL	MEM	33	1	1	0	0.375204
PC 16:1;0_17:1;0	PC	GPL	MEM	33	2	2	0	1.80691
PC 16:1;0_18:0;0	PC	GPL	MEM	34	1	1	0	4.11578
PC 16:1;0_18:1;0	PC	GPL	MEM	34	2	2	0	27.4653
PC 16:1;0_18:2;0	PC	GPL	MEM	34	3	3	0	1.85731
PC 16:1;0_18:3;0	PC	GPL	MEM	34	4	4	0	0
PC 16:1;0_19:0;0	PC	GPL	MEM	35	1	1	0	0
PC 16:1;0_19:1;0	PC	GPL	MEM	35	2	2	0	0.152919
PC 16:1;0_19:2;0	PC	GPL	MEM	35	3	3	0	0
PC 16:1;0_20:0;0	PC	GPL	MEM	36	1	1	0	0
PC 16:1;0_20:1;0	PC	GPL	MEM	36	2	2	0	1.34693
PC 16:1;0_20:2;0	PC	GPL	MEM	36	3	3	0	0
PC 16:1;0_20:3;0	PC	GPL	MEM	36	4	4	0	0.330948
PC 16:1;0_20:4;0	PC	GPL	MEM	36	5	5	0	5.2849
PC 16:1;0_20:5;0	PC	GPL	MEM	36	6	6	0	0
PC 16:1;0_22:1;0	PC	GPL	MEM	38	2	2	0	0
PC 16:1;0_22:2;0	PC	GPL	MEM	38	3	3	0	0
PC 16:1;0_22:4;0	PC	GPL	MEM	38	5	5	0	0
PC 16:1;0_22:5;0	PC	GPL	MEM	38	6	6	0	0
PC 16:1;0_22:6;0	PC	GPL	MEM	38	7	7	0	0
PC 16:1;0_24:0;0	PC	GPL	MEM	40	1	1	0	0
PC 16:1;0_24:1;0	PC	GPL	MEM	40	2	2	0	0
PC 16:1;0_24:6;0	PC	GPL	MEM	40	7	7	0	0
PC 16:2;0_17:0;0	PC	GPL	MEM	33	2	2	0	0
PC 16:2;0_17:1;0	PC	GPL	MEM	33	3	3	0	0
PC 16:2;0_18:0;0	PC	GPL	MEM	34	2	2	0	0
PC 16:2;0_18:1;0	PC	GPL	MEM	34	3	3	0	0.678728
PC 17:0;0_17:1;0	PC	GPL	MEM	34	1	1	0	0.203702
PC 17:0;0_18:0;0	PC	GPL	MEM	35	0	0	0	0
PC 17:0;0_18:1;0	PC	GPL	MEM	35	1	1	0	3.72823
PC 17:0;0_18:2;0	PC	GPL	MEM	35	2	2	0	0.581124
PC 17:0;0_19:0;0	PC	GPL	MEM	36	0	0	0	0
PC 17:0;0_19:1;0	PC	GPL	MEM	36	1	1	0	0
PC 17:0;0_20:1;0	PC	GPL	MEM	37	1	1	0	0
PC 17:0;0_20:2;0	PC	GPL	MEM	37	2	2	0	0
PC 17:0;0_20:3;0	PC	GPL	MEM	37	3	3	0	0
PC 17:0;0_20:4;0	PC	GPL	MEM	37	4	4	0	0
PC 17:0;0_20:5;0	PC	GPL	MEM	37	5	5	0	0
PC 17:0;0_21:1;0	PC	GPL	MEM	38	1	1	0	0
PC 17:0;0_22:5;0	PC	GPL	MEM	39	5	5	0	0
PC 17:0;0_22:6;0	PC	GPL	MEM	39	6	6	0	0
PC 17:0;0_24:6;0	PC	GPL	MEM	41	6	6	0	0
PC 17:1;0_17:1;0	PC	GPL	MEM	34	2	2	0	0.311218
PC 17:1;0_18:0;0	PC	GPL	MEM	35	1	1	0	0.629813
PC 17:1;0_18:1;0	PC	GPL	MEM	35	2	2	0	6.76656
PC 17:1;0_18:2;0	PC	GPL	MEM	35	3	3	0	0
PC 17:1;0_19:1;0	PC	GPL	MEM	36	2	2	0	0
PC 17:1;0_20:0;0	PC	GPL	MEM	37	1	1	0	0
PC 17:1;0_20:1;0	PC	GPL	MEM	37	2	2	0	0
PC 17:1;0_20:2;0	PC	GPL	MEM	37	3	3	0	0
PC 17:1;0_20:3;0	PC	GPL	MEM	37	4	4	0	0
PC 17:1;0_20:4;0	PC	GPL	MEM	37	5	5	0	0
PC 17:1;0_20:5;0	PC	GPL	MEM	37	6	6	0	0
PC 17:1;0_22:4;0	PC	GPL	MEM	39	5	5	0	0
PC 17:1;0_22:5;0	PC	GPL	MEM	39	6	6	0	0
PC 17:1;0_22:6;0	PC	GPL	MEM	39	7	7	0	0
PC 17:2;0_18:1;0	PC	GPL	MEM	35	3	3	0	0
PC 18:0;0_18:0;0	PC	GPL	MEM	36	0	0	0	0
PC 18:0;0_18:1;0	PC	GPL	MEM	36	1	1	0	19.6592
PC 18:0;0_18:2;0	PC	GPL	MEM	36	2	2	0	5.12732
PC 18:0;0_18:3;0	PC	GPL	MEM	36	3	3	0	0.447979
PC 18:0;0_19:1;0	PC	GPL	MEM	37	1	1	0	0
PC 18:0;0_19:2;0	PC	GPL	MEM	37	2	2	0	0
PC 18:0;0_20:1;0	PC	GPL	MEM	38	1	1	0	0
PC 18:0;0_20:2;0	PC	GPL	MEM	38	2	2	0	0.591958
PC 18:0;0_20:3;0	PC	GPL	MEM	38	3	3	0	1.60812
PC 18:0;0_20:4;0	PC	GPL	MEM	38	4	4	0	1.69681
PC 18:0;0_20:5;0	PC	GPL	MEM	38	5	5	0	0
PC 18:0;0_22:1;0	PC	GPL	MEM	40	1	1	0	0
PC 18:0;0_22:3;0	PC	GPL	MEM	40	3	3	0	0
PC 18:0;0_22:4;0	PC	GPL	MEM	40	4	4	0	0
PC 18:0;0_22:5;0	PC	GPL	MEM	40	5	5	0	0
PC 18:0;0_22:6;0	PC	GPL	MEM	40	6	6	0	0
PC 18:0;0_24:0;0	PC	GPL	MEM	42	0	0	0	0
PC 18:0;0_24:5;0	PC	GPL	MEM	42	5	5	0	0
PC 18:0;0_24:6;0	PC	GPL	MEM	42	6	6	0	0
PC 18:1;0_18:1;0	PC	GPL	MEM	36	2	2	0	68.0849
PC 18:1;0_18:2;0	PC	GPL	MEM	36	3	3	0	8.47264
PC 18:1;0_18:3;0	PC	GPL	MEM	36	4	4	0	0.779959
PC 18:1;0_19:0;0	PC	GPL	MEM	37	1	1	0	0
PC 18:1;0_19:1;0	PC	GPL	MEM	37	2	2	0	1.89179
PC 18:1;0_19:2;0	PC	GPL	MEM	37	3	3	0	0
PC 18:1;0_20:0;0	PC	GPL	MEM	38	1	1	0	0
PC 18:1;0_20:1;0	PC	GPL	MEM	38	2	2	0	7.088
PC 18:1;0_20:2;0	PC	GPL	MEM	38	3	3	0	1.61916
PC 18:1;0_20:3;0	PC	GPL	MEM	38	4	4	0	1.64251
PC 18:1;0_20:4;0	PC	GPL	MEM	38	5	5	0	2.55091
PC 18:1;0_20:5;0	PC	GPL	MEM	38	6	6	0	0
PC 18:1;0_21:1;0	PC	GPL	MEM	39	2	2	0	0
PC 18:1;0_21:2;0	PC	GPL	MEM	39	3	3	0	0
PC 18:1;0_22:0;0	PC	GPL	MEM	40	1	1	0	0
PC 18:1;0_22:1;0	PC	GPL	MEM	40	2	2	0	0
PC 18:1;0_22:2;0	PC	GPL	MEM	40	3	3	0	0
PC 18:1;0_22:3;0	PC	GPL	MEM	40	4	4	0	0
PC 18:1;0_22:4;0	PC	GPL	MEM	40	5	5	0	1.63922
PC 18:1;0_22:5;0	PC	GPL	MEM	40	6	6	0	1.72655
PC 18:1;0_22:6;0	PC	GPL	MEM	40	7	7	0	0
PC 18:1;0_24:0;0	PC	GPL	MEM	42	1	1	0	0
PC 18:1;0_24:1;0	PC	GPL	MEM	42	2	2	0	0
PC 18:1;0_24:5;0	PC	GPL	MEM	42	6	6	0	0
PC 18:1;0_24:6;0	PC	GPL	MEM	42	7	7	0	0
PC 18:2;0_18:2;0	PC	GPL	MEM	36	4	4	0	0.301688
PC 18:2;0_19:1;0	PC	GPL	MEM	37	3	3	0	0
PC 18:2;0_20:1;0	PC	GPL	MEM	38	3	3	0	0.664524
PC 18:2;0_20:2;0	PC	GPL	MEM	38	4	4	0	0
PC 18:2;0_20:3;0	PC	GPL	MEM	38	5	5	0	0
PC 18:2;0_20:4;0	PC	GPL	MEM	38	6	6	0	0
PC 19:1;0_19:1;0	PC	GPL	MEM	38	2	2	0	0
PC 20:1;0_20:1;0	PC	GPL	MEM	40	2	2	0	0
PC 20:1;0_20:2;0	PC	GPL	MEM	40	3	3	0	0
PC 20:1;0_20:3;0	PC	GPL	MEM	40	4	4	0	0
PC 20:1;0_20:4;0	PC	GPL	MEM	40	5	5	0	0
PC 20:1;0_20:5;0	PC	GPL	MEM	40	6	6	0	0
PC 20:2;0_20:2;0	PC	GPL	MEM	40	4	4	0	0
PC 20:2;0_20:3;0	PC	GPL	MEM	40	5	5	0	0
PC 20:2;0_20:4;0	PC	GPL	MEM	40	6	6	0	0
PC 20:3;0_20:3;0	PC	GPL	MEM	40	6	6	0	0
PC 20:3;0_20:4;0	PC	GPL	MEM	40	7	7	0	0
PC 20:4;0_20:4;0	PC	GPL	MEM	40	8	8	0	0
PC 22:6;0_22:6;0	PC	GPL	MEM	44	12	12	0	0
PC O-16:0;0/16:0;0	PC O-	GPL	MEM	32	0	0	0	1.07927
PC O-16:0;0/16:1;0	PC O-	GPL	MEM	32	1	0	0	1.80394
PC O-16:0;0/16:2;0	PC O-	GPL	MEM	32	2	1	0	0
PC O-16:0;0/17:0;0	PC O-	GPL	MEM	33	0	0	0	0
PC O-16:0;0/17:1;0	PC O-	GPL	MEM	33	1	0	0	0.0223252
PC O-16:0;0/18:0;0	PC O-	GPL	MEM	34	0	0	0	0
PC O-16:0;0/18:1;0	PC O-	GPL	MEM	34	1	0	0	8.44385
PC O-16:0;0/18:2;0	PC O-	GPL	MEM	34	2	1	0	1.05703
PC O-16:0;0/18:3;0	PC O-	GPL	MEM	34	3	2	0	0
PC O-16:0;0/19:0;0	PC O-	GPL	MEM	35	0	0	0	0
PC O-16:0;0/19:1;0	PC O-	GPL	MEM	35	1	0	0	0
PC O-16:0;0/19:2;0	PC O-	GPL	MEM	35	2	1	0	0
PC O-16:0;0/20:0;0	PC O-	GPL	MEM	36	0	0	0	0
PC O-16:0;0/20:1;0	PC O-	GPL	MEM	36	1	0	0	0.194726
PC O-16:0;0/20:2;0	PC O-	GPL	MEM	36	2	1	0	0.0614175
PC O-16:0;0/20:3;0	PC O-	GPL	MEM	36	3	2	0	0.458051
PC O-16:0;0/20:4;0	PC O-	GPL	MEM	36	4	3	0	2.26106
PC O-16:0;0/20:5;0	PC O-	GPL	MEM	36	5	4	0	0
PC O-16:0;0/21:1;0	PC O-	GPL	MEM	37	1	0	0	0
PC O-16:0;0/22:0;0	PC O-	GPL	MEM	38	0	0	0	0
PC O-16:0;0/22:1;0	PC O-	GPL	MEM	38	1	0	0	0
PC O-16:0;0/22:2;0	PC O-	GPL	MEM	38	2	1	0	0
PC O-16:0;0/22:3;0	PC O-	GPL	MEM	38	3	2	0	0
PC O-16:0;0/22:4;0	PC O-	GPL	MEM	38	4	3	0	0.356347
PC O-16:0;0/22:5;0	PC O-	GPL	MEM	38	5	4	0	0.610696
PC O-16:0;0/22:6;0	PC O-	GPL	MEM	38	6	5	0	0
PC O-16:0;0/24:1;0	PC O-	GPL	MEM	40	1	0	0	0
PC O-16:0;0/24:2;0	PC O-	GPL	MEM	40	2	1	0	0
PC O-16:0;0/24:4;0	PC O-	GPL	MEM	40	4	3	0	0
PC O-16:0;0/24:5;0	PC O-	GPL	MEM	40	5	4	0	0
PC O-16:0;0/24:6;0	PC O-	GPL	MEM	40	6	5	0	0
PC O-16:1;0/16:0;0	PC O-	GPL	MEM	32	1	0	0	1.05507
PC O-16:1;0/16:1;0	PC O-	GPL	MEM	32	2	1	0	0
PC O-16:1;0/17:0;0	PC O-	GPL	MEM	33	1	0	0	0.0332188
PC O-16:1;0/17:1;0	PC O-	GPL	MEM	33	2	1	0	0
PC O-16:1;0/18:0;0	PC O-	GPL	MEM	34	1	0	0	0.375125
PC O-16:1;0/18:1;0	PC O-	GPL	MEM	34	2	1	0	1.12594
PC O-16:1;0/18:2;0	PC O-	GPL	MEM	34	3	2	0	0
PC O-16:1;0/19:1;0	PC O-	GPL	MEM	35	2	1	0	0
PC O-16:1;0/20:0;0	PC O-	GPL	MEM	36	1	0	0	0
PC O-16:1;0/20:1;0	PC O-	GPL	MEM	36	2	1	0	0.0356826
PC O-16:1;0/20:2;0	PC O-	GPL	MEM	36	3	2	0	0
PC O-16:1;0/20:3;0	PC O-	GPL	MEM	36	4	3	0	0
PC O-16:1;0/20:4;0	PC O-	GPL	MEM	36	5	4	0	0
PC O-16:1;0/22:1;0	PC O-	GPL	MEM	38	2	1	0	0
PC O-16:1;0/22:2;0	PC O-	GPL	MEM	38	3	2	0	0
PC O-16:1;0/22:3;0	PC O-	GPL	MEM	38	4	3	0	0
PC O-16:1;0/22:4;0	PC O-	GPL	MEM	38	5	4	0	0
PC O-16:1;0/22:5;0	PC O-	GPL	MEM	38	6	5	0	0
PC O-16:1;0/22:6;0	PC O-	GPL	MEM	38	7	6	0	0
PC O-16:1;0/24:5;0	PC O-	GPL	MEM	40	6	5	0	0
PC O-16:2;0/16:0;0	PC O-	GPL	MEM	32	2	1	0	0
PC O-16:2;0/16:1;0	PC O-	GPL	MEM	32	3	2	0	0
PC O-16:2;0/17:0;0	PC O-	GPL	MEM	33	2	1	0	0
PC O-16:2;0/18:0;0	PC O-	GPL	MEM	34	2	1	0	0.256349
PC O-16:2;0/18:1;0	PC O-	GPL	MEM	34	3	2	0	0
PC O-16:2;0/19:0;0	PC O-	GPL	MEM	35	2	1	0	0
PC O-16:2;0/19:1;0	PC O-	GPL	MEM	35	3	2	0	0
PC O-16:2;0/20:0;0	PC O-	GPL	MEM	36	2	1	0	0
PC O-16:2;0/20:1;0	PC O-	GPL	MEM	36	3	2	0	0
PC O-16:2;0/20:2;0	PC O-	GPL	MEM	36	4	3	0	0
PC O-16:2;0/20:3;0	PC O-	GPL	MEM	36	5	4	0	0
PC O-16:2;0/20:4;0	PC O-	GPL	MEM	36	6	5	0	0
PC O-16:2;0/22:0;0	PC O-	GPL	MEM	38	2	1	0	0
PC O-16:2;0/22:1;0	PC O-	GPL	MEM	38	3	2	0	0
PC O-16:2;0/22:4;0	PC O-	GPL	MEM	38	6	5	0	0
PC O-17:0;0/15:0;0	PC O-	GPL	MEM	32	0	0	0	0.152698
PC O-17:0;0/15:1;0	PC O-	GPL	MEM	32	1	0	0	0
PC O-17:0;0/16:0;0	PC O-	GPL	MEM	33	0	0	0	0
PC O-17:0;0/16:1;0	PC O-	GPL	MEM	33	1	0	0	0.897506
PC O-17:0;0/16:2;0	PC O-	GPL	MEM	33	2	1	0	0
PC O-17:0;0/17:0;0	PC O-	GPL	MEM	34	0	0	0	0
PC O-17:0;0/17:1;0	PC O-	GPL	MEM	34	1	0	0	1.48083
PC O-17:0;0/17:2;0	PC O-	GPL	MEM	34	2	1	0	0
PC O-17:0;0/18:1;0	PC O-	GPL	MEM	35	1	0	0	0
PC O-17:0;0/18:2;0	PC O-	GPL	MEM	35	2	1	0	0
PC O-17:0;0/18:3;0	PC O-	GPL	MEM	35	3	2	0	0
PC O-17:0;0/19:0;0	PC O-	GPL	MEM	36	0	0	0	0
PC O-17:0;0/19:1;0	PC O-	GPL	MEM	36	1	0	0	0.198251
PC O-17:0;0/19:2;0	PC O-	GPL	MEM	36	2	1	0	0
PC O-17:0;0/20:1;0	PC O-	GPL	MEM	37	1	0	0	0
PC O-17:0;0/20:2;0	PC O-	GPL	MEM	37	2	1	0	0
PC O-17:0;0/20:4;0	PC O-	GPL	MEM	37	4	3	0	0
PC O-17:0;0/21:1;0	PC O-	GPL	MEM	38	1	0	0	0
PC O-17:0;0/22:6;0	PC O-	GPL	MEM	39	6	5	0	0
PC O-17:1;0/15:0;0	PC O-	GPL	MEM	32	1	0	0	0.0586073
PC O-17:1;0/16:0;0	PC O-	GPL	MEM	33	1	0	0	0.574268
PC O-17:1;0/16:1;0	PC O-	GPL	MEM	33	2	1	0	0
PC O-17:1;0/16:2;0	PC O-	GPL	MEM	33	3	2	0	0
PC O-17:1;0/17:0;0	PC O-	GPL	MEM	34	1	0	0	0.125142
PC O-17:1;0/17:1;0	PC O-	GPL	MEM	34	2	1	0	0.359384
PC O-17:1;0/18:0;0	PC O-	GPL	MEM	35	1	0	0	0
PC O-17:1;0/18:1;0	PC O-	GPL	MEM	35	2	1	0	0
PC O-17:1;0/18:2;0	PC O-	GPL	MEM	35	3	2	0	0
PC O-17:1;0/19:0;0	PC O-	GPL	MEM	36	1	0	0	0
PC O-17:1;0/19:1;0	PC O-	GPL	MEM	36	2	1	0	0.0357088
PC O-17:1;0/19:2;0	PC O-	GPL	MEM	36	3	2	0	0
PC O-17:1;0/20:0;0	PC O-	GPL	MEM	37	1	0	0	0
PC O-17:1;0/20:1;0	PC O-	GPL	MEM	37	2	1	0	0
PC O-17:1;0/20:3;0	PC O-	GPL	MEM	37	4	3	0	0
PC O-17:1;0/22:6;0	PC O-	GPL	MEM	39	7	6	0	0
PC O-17:2;0/15:0;0	PC O-	GPL	MEM	32	2	1	0	0
PC O-17:2;0/16:0;0	PC O-	GPL	MEM	33	2	1	0	0
PC O-17:2;0/16:1;0	PC O-	GPL	MEM	33	3	2	0	0
PC O-17:2;0/17:0;0	PC O-	GPL	MEM	34	2	1	0	0.115509
PC O-17:2;0/17:1;0	PC O-	GPL	MEM	34	3	2	0	0
PC O-17:2;0/18:0;0	PC O-	GPL	MEM	35	2	1	0	0
PC O-17:2;0/18:1;0	PC O-	GPL	MEM	35	3	2	0	0
PC O-18:0;0/14:0;0	PC O-	GPL	MEM	32	0	0	0	0.698681
PC O-18:0;0/14:1;0	PC O-	GPL	MEM	32	1	0	0	0
PC O-18:0;0/15:0;0	PC O-	GPL	MEM	33	0	0	0	0
PC O-18:0;0/16:0;0	PC O-	GPL	MEM	34	0	0	0	0
PC O-18:0;0/16:1;0	PC O-	GPL	MEM	34	1	0	0	0.527825
PC O-18:0;0/16:2;0	PC O-	GPL	MEM	34	2	1	0	0
PC O-18:0;0/17:0;0	PC O-	GPL	MEM	35	0	0	0	0
PC O-18:0;0/17:1;0	PC O-	GPL	MEM	35	1	0	0	0
PC O-18:0;0/18:0;0	PC O-	GPL	MEM	36	0	0	0	0
PC O-18:0;0/18:1;0	PC O-	GPL	MEM	36	1	0	0	1.58971
PC O-18:0;0/18:2;0	PC O-	GPL	MEM	36	2	1	0	0.479898
PC O-18:0;0/18:3;0	PC O-	GPL	MEM	36	3	2	0	0
PC O-18:0;0/19:1;0	PC O-	GPL	MEM	37	1	0	0	0
PC O-18:0;0/20:0;0	PC O-	GPL	MEM	38	0	0	0	0
PC O-18:0;0/20:1;0	PC O-	GPL	MEM	38	1	0	0	0
PC O-18:0;0/20:2;0	PC O-	GPL	MEM	38	2	1	0	0
PC O-18:0;0/20:3;0	PC O-	GPL	MEM	38	3	2	0	0
PC O-18:0;0/20:4;0	PC O-	GPL	MEM	38	4	3	0	0.435392
PC O-18:0;0/20:5;0	PC O-	GPL	MEM	38	5	4	0	0
PC O-18:0;0/22:0;0	PC O-	GPL	MEM	40	0	0	0	0
PC O-18:0;0/22:1;0	PC O-	GPL	MEM	40	1	0	0	0
PC O-18:0;0/22:4;0	PC O-	GPL	MEM	40	4	3	0	0
PC O-18:0;0/22:5;0	PC O-	GPL	MEM	40	5	4	0	0
PC O-18:0;0/22:6;0	PC O-	GPL	MEM	40	6	5	0	0
PC O-18:0;0/24:1;0	PC O-	GPL	MEM	42	1	0	0	0
PC O-18:0;0/24:6;0	PC O-	GPL	MEM	42	6	5	0	0
PC O-18:1;0/14:0;0	PC O-	GPL	MEM	32	1	0	0	0.492248
PC O-18:1;0/15:0;0	PC O-	GPL	MEM	33	1	0	0	0.00599837
PC O-18:1;0/16:0;0	PC O-	GPL	MEM	34	1	0	0	5.63818
PC O-18:1;0/16:1;0	PC O-	GPL	MEM	34	2	1	0	0.938181
PC O-18:1;0/16:2;0	PC O-	GPL	MEM	34	3	2	0	0
PC O-18:1;0/17:0;0	PC O-	GPL	MEM	35	1	0	0	0
PC O-18:1;0/17:1;0	PC O-	GPL	MEM	35	2	1	0	0
PC O-18:1;0/18:0;0	PC O-	GPL	MEM	36	1	0	0	0.176598
PC O-18:1;0/18:1;0	PC O-	GPL	MEM	36	2	1	0	5.09041
PC O-18:1;0/18:2;0	PC O-	GPL	MEM	36	3	2	0	0.981037
PC O-18:1;0/18:3;0	PC O-	GPL	MEM	36	4	3	0	0
PC O-18:1;0/20:0;0	PC O-	GPL	MEM	38	1	0	0	0
PC O-18:1;0/20:1;0	PC O-	GPL	MEM	38	2	1	0	0
PC O-18:1;0/20:2;0	PC O-	GPL	MEM	38	3	2	0	0
PC O-18:1;0/20:3;0	PC O-	GPL	MEM	38	4	3	0	0.686252
PC O-18:1;0/20:4;0	PC O-	GPL	MEM	38	5	4	0	2.44365
PC O-18:1;0/20:5;0	PC O-	GPL	MEM	38	6	5	0	0
PC O-18:1;0/22:3;0	PC O-	GPL	MEM	40	4	3	0	0
PC O-18:1;0/22:4;0	PC O-	GPL	MEM	40	5	4	0	0
PC O-18:1;0/22:5;0	PC O-	GPL	MEM	40	6	5	0	0.91427
PC O-18:1;0/22:6;0	PC O-	GPL	MEM	40	7	6	0	0
PC O-18:2;0/14:0;0	PC O-	GPL	MEM	32	2	1	0	0
PC O-18:2;0/15:0;0	PC O-	GPL	MEM	33	2	1	0	0
PC O-18:2;0/16:0;0	PC O-	GPL	MEM	34	2	1	0	0.511156
PC O-18:2;0/16:1;0	PC O-	GPL	MEM	34	3	2	0	0
PC O-18:2;0/17:0;0	PC O-	GPL	MEM	35	2	1	0	0
PC O-18:2;0/17:1;0	PC O-	GPL	MEM	35	3	2	0	0
PC O-18:2;0/18:0;0	PC O-	GPL	MEM	36	2	1	0	0.394979
PC O-18:2;0/18:1;0	PC O-	GPL	MEM	36	3	2	0	0.849823
PC O-18:2;0/18:2;0	PC O-	GPL	MEM	36	4	3	0	0.299408
PC O-18:2;0/20:1;0	PC O-	GPL	MEM	38	3	2	0	0
PC O-18:2;0/20:2;0	PC O-	GPL	MEM	38	4	3	0	0
PC O-18:2;0/20:3;0	PC O-	GPL	MEM	38	5	4	0	0
PC O-18:2;0/20:4;0	PC O-	GPL	MEM	38	6	5	0	0
PC O-18:2;0/22:3;0	PC O-	GPL	MEM	40	5	4	0	0
PC O-18:2;0/22:4;0	PC O-	GPL	MEM	40	6	5	0	0
PC O-18:2;0/22:5;0	PC O-	GPL	MEM	40	7	6	0	0
PE 12:0;0_18:1;0	PE	GPL	MEM	30	1	1	0	0
PE 14:0;0_16:0;0	PE	GPL	MEM	30	0	0	0	0
PE 14:0;0_16:1;0	PE	GPL	MEM	30	1	1	0	0
PE 14:0;0_18:0;0	PE	GPL	MEM	32	0	0	0	0
PE 14:0;0_18:1;0	PE	GPL	MEM	32	1	1	0	0.214502
PE 14:0;0_18:2;0	PE	GPL	MEM	32	2	2	0	0
PE 14:0;0_20:1;0	PE	GPL	MEM	34	1	1	0	0
PE 14:0;0_20:2;0	PE	GPL	MEM	34	2	2	0	0
PE 14:0;0_20:3;0	PE	GPL	MEM	34	3	3	0	0
PE 14:1;0_18:0;0	PE	GPL	MEM	32	1	1	0	0.172886
PE 14:1;0_18:1;0	PE	GPL	MEM	32	2	2	0	0
PE 15:0;0_17:0;0	PE	GPL	MEM	32	0	0	0	0
PE 15:0;0_17:1;0	PE	GPL	MEM	32	1	1	0	0
PE 15:0;0_18:1;0	PE	GPL	MEM	33	1	1	0	0
PE 15:0;0_18:2;0	PE	GPL	MEM	33	2	2	0	0
PE 15:0;0_19:1;0	PE	GPL	MEM	34	1	1	0	0
PE 15:0;0_20:3;0	PE	GPL	MEM	35	3	3	0	0
PE 15:0;0_22:2;0	PE	GPL	MEM	37	2	2	0	0
PE 15:0;0_22:3;0	PE	GPL	MEM	37	3	3	0	0
PE 15:0;0_22:4;0	PE	GPL	MEM	37	4	4	0	0
PE 15:0;0_22:5;0	PE	GPL	MEM	37	5	5	0	0
PE 15:0;0_24:5;0	PE	GPL	MEM	39	5	5	0	0
PE 15:0;0_24:6;0	PE	GPL	MEM	39	6	6	0	0
PE 15:1;0_17:1;0	PE	GPL	MEM	32	2	2	0	0
PE 15:1;0_24:5;0	PE	GPL	MEM	39	6	6	0	0
PE 16:0;0_16:0;0	PE	GPL	MEM	32	0	0	0	0
PE 16:0;0_16:1;0	PE	GPL	MEM	32	1	1	0	0.725611
PE 16:0;0_16:2;0	PE	GPL	MEM	32	2	2	0	0
PE 16:0;0_17:1;0	PE	GPL	MEM	33	1	1	0	0
PE 16:0;0_18:0;0	PE	GPL	MEM	34	0	0	0	0.585003
PE 16:0;0_18:1;0	PE	GPL	MEM	34	1	1	0	7.20711
PE 16:0;0_18:2;0	PE	GPL	MEM	34	2	2	0	0.946688
PE 16:0;0_18:3;0	PE	GPL	MEM	34	3	3	0	0
PE 16:0;0_19:1;0	PE	GPL	MEM	35	1	1	0	0
PE 16:0;0_19:2;0	PE	GPL	MEM	35	2	2	0	0
PE 16:0;0_20:1;0	PE	GPL	MEM	36	1	1	0	0.336298
PE 16:0;0_20:2;0	PE	GPL	MEM	36	2	2	0	0.211278
PE 16:0;0_20:3;0	PE	GPL	MEM	36	3	3	0	0.684862
PE 16:0;0_20:4;0	PE	GPL	MEM	36	4	4	0	1.85579
PE 16:0;0_20:5;0	PE	GPL	MEM	36	5	5	0	0
PE 16:0;0_22:1;0	PE	GPL	MEM	38	1	1	0	0
PE 16:0;0_22:2;0	PE	GPL	MEM	38	2	2	0	0
PE 16:0;0_22:3;0	PE	GPL	MEM	38	3	3	0	0
PE 16:0;0_22:4;0	PE	GPL	MEM	38	4	4	0	1.14743
PE 16:0;0_22:5;0	PE	GPL	MEM	38	5	5	0	2.59022
PE 16:0;0_22:6;0	PE	GPL	MEM	38	6	6	0	0
PE 16:1;0_16:1;0	PE	GPL	MEM	32	2	2	0	0
PE 16:1;0_17:0;0	PE	GPL	MEM	33	1	1	0	0
PE 16:1;0_17:1;0	PE	GPL	MEM	33	2	2	0	0
PE 16:1;0_18:0;0	PE	GPL	MEM	34	1	1	0	1.58477
PE 16:1;0_18:1;0	PE	GPL	MEM	34	2	2	0	2.85025
PE 16:1;0_18:2;0	PE	GPL	MEM	34	3	3	0	0
PE 16:1;0_19:1;0	PE	GPL	MEM	35	2	2	0	0
PE 16:1;0_20:0;0	PE	GPL	MEM	36	1	1	0	0
PE 16:1;0_20:1;0	PE	GPL	MEM	36	2	2	0	0.166802
PE 16:1;0_20:2;0	PE	GPL	MEM	36	3	3	0	0
PE 16:1;0_20:3;0	PE	GPL	MEM	36	4	4	0	0.299043
PE 16:1;0_20:4;0	PE	GPL	MEM	36	5	5	0	0
PE 16:1;0_20:5;0	PE	GPL	MEM	36	6	6	0	0
PE 16:1;0_21:3;0	PE	GPL	MEM	37	4	4	0	0
PE 16:1;0_22:0;0	PE	GPL	MEM	38	1	1	0	0
PE 16:1;0_22:1;0	PE	GPL	MEM	38	2	2	0	0
PE 16:1;0_22:2;0	PE	GPL	MEM	38	3	3	0	0
PE 16:1;0_22:3;0	PE	GPL	MEM	38	4	4	0	0
PE 16:1;0_22:4;0	PE	GPL	MEM	38	5	5	0	0.111897
PE 16:1;0_22:5;0	PE	GPL	MEM	38	6	6	0	1.49795
PE 16:1;0_22:6;0	PE	GPL	MEM	38	7	7	0	0
PE 16:1;0_24:0;0	PE	GPL	MEM	40	1	1	0	0
PE 16:1;0_24:1;0	PE	GPL	MEM	40	2	2	0	0
PE 16:1;0_24:2;0	PE	GPL	MEM	40	3	3	0	0
PE 16:1;0_24:3;0	PE	GPL	MEM	40	4	4	0	0.232805
PE 16:1;0_24:4;0	PE	GPL	MEM	40	5	5	0	0
PE 16:1;0_24:6;0	PE	GPL	MEM	40	7	7	0	0
PE 16:2;0_18:0;0	PE	GPL	MEM	34	2	2	0	0
PE 16:2;0_18:1;0	PE	GPL	MEM	34	3	3	0	0
PE 17:0;0_17:1;0	PE	GPL	MEM	34	1	1	0	0
PE 17:0;0_18:1;0	PE	GPL	MEM	35	1	1	0	0.807381
PE 17:0;0_18:2;0	PE	GPL	MEM	35	2	2	0	0
PE 17:0;0_19:1;0	PE	GPL	MEM	36	1	1	0	0
PE 17:0;0_20:1;0	PE	GPL	MEM	37	1	1	0	0
PE 17:0;0_20:2;0	PE	GPL	MEM	37	2	2	0	0
PE 17:0;0_20:3;0	PE	GPL	MEM	37	3	3	0	0
PE 17:0;0_20:4;0	PE	GPL	MEM	37	4	4	0	0
PE 17:0;0_20:5;0	PE	GPL	MEM	37	5	5	0	0
PE 17:0;0_22:4;0	PE	GPL	MEM	39	4	4	0	0
PE 17:0;0_22:5;0	PE	GPL	MEM	39	5	5	0	0
PE 17:0;0_22:6;0	PE	GPL	MEM	39	6	6	0	0
PE 17:0;0_24:6;0	PE	GPL	MEM	41	6	6	0	0
PE 17:1;0_17:1;0	PE	GPL	MEM	34	2	2	0	0.0548006
PE 17:1;0_18:0;0	PE	GPL	MEM	35	1	1	0	0.298811
PE 17:1;0_18:1;0	PE	GPL	MEM	35	2	2	0	5.15331
PE 17:1;0_18:2;0	PE	GPL	MEM	35	3	3	0	0
PE 17:1;0_19:1;0	PE	GPL	MEM	36	2	2	0	0.463852
PE 17:1;0_19:2;0	PE	GPL	MEM	36	3	3	0	0
PE 17:1;0_20:0;0	PE	GPL	MEM	37	1	1	0	0
PE 17:1;0_20:1;0	PE	GPL	MEM	37	2	2	0	0
PE 17:1;0_20:2;0	PE	GPL	MEM	37	3	3	0	0
PE 17:1;0_20:3;0	PE	GPL	MEM	37	4	4	0	0
PE 17:1;0_20:4;0	PE	GPL	MEM	37	5	5	0	0
PE 17:1;0_21:1;0	PE	GPL	MEM	38	2	2	0	0
PE 17:1;0_21:2;0	PE	GPL	MEM	38	3	3	0	0
PE 17:1;0_21:3;0	PE	GPL	MEM	38	4	4	0	0
PE 17:1;0_22:2;0	PE	GPL	MEM	39	3	3	0	0
PE 17:1;0_22:3;0	PE	GPL	MEM	39	4	4	0	0
PE 17:1;0_22:4;0	PE	GPL	MEM	39	5	5	0	0
PE 17:1;0_22:5;0	PE	GPL	MEM	39	6	6	0	0
PE 17:1;0_22:6;0	PE	GPL	MEM	39	7	7	0	0
PE 17:1;0_24:5;0	PE	GPL	MEM	41	6	6	0	0
PE 17:1;0_24:6;0	PE	GPL	MEM	41	7	7	0	0
PE 18:0;0_18:1;0	PE	GPL	MEM	36	1	1	0	12.5812
PE 18:0;0_18:2;0	PE	GPL	MEM	36	2	2	0	2.54939
PE 18:0;0_18:3;0	PE	GPL	MEM	36	3	3	0	0.202999
PE 18:0;0_19:1;0	PE	GPL	MEM	37	1	1	0	0
PE 18:0;0_19:2;0	PE	GPL	MEM	37	2	2	0	0
PE 18:0;0_20:1;0	PE	GPL	MEM	38	1	1	0	0
PE 18:0;0_20:2;0	PE	GPL	MEM	38	2	2	0	0.183522
PE 18:0;0_20:3;0	PE	GPL	MEM	38	3	3	0	1.74786
PE 18:0;0_20:4;0	PE	GPL	MEM	38	4	4	0	7.00243
PE 18:0;0_20:5;0	PE	GPL	MEM	38	5	5	0	0
PE 18:0;0_21:3;0	PE	GPL	MEM	39	3	3	0	0
PE 18:0;0_22:2;0	PE	GPL	MEM	40	2	2	0	0
PE 18:0;0_22:3;0	PE	GPL	MEM	40	3	3	0	0
PE 18:0;0_22:4;0	PE	GPL	MEM	40	4	4	0	1.98123
PE 18:0;0_22:5;0	PE	GPL	MEM	40	5	5	0	2.73181
PE 18:0;0_22:6;0	PE	GPL	MEM	40	6	6	0	1.2703
PE 18:1;0_18:1;0	PE	GPL	MEM	36	2	2	0	17.3413
PE 18:1;0_18:2;0	PE	GPL	MEM	36	3	3	0	1.91309
PE 18:1;0_18:3;0	PE	GPL	MEM	36	4	4	0	0.265384
PE 18:1;0_19:0;0	PE	GPL	MEM	37	1	1	0	0
PE 18:1;0_19:1;0	PE	GPL	MEM	37	2	2	0	0.437316
PE 18:1;0_19:2;0	PE	GPL	MEM	37	3	3	0	0
PE 18:1;0_20:0;0	PE	GPL	MEM	38	1	1	0	0
PE 18:1;0_20:1;0	PE	GPL	MEM	38	2	2	0	0.801256
PE 18:1;0_20:2;0	PE	GPL	MEM	38	3	3	0	0.324314
PE 18:1;0_20:3;0	PE	GPL	MEM	38	4	4	0	2.00918
PE 18:1;0_20:4;0	PE	GPL	MEM	38	5	5	0	1.92251
PE 18:1;0_20:5;0	PE	GPL	MEM	38	6	6	0	0
PE 18:1;0_21:3;0	PE	GPL	MEM	39	4	4	0	0
PE 18:1;0_22:0;0	PE	GPL	MEM	40	1	1	0	0
PE 18:1;0_22:1;0	PE	GPL	MEM	40	2	2	0	0
PE 18:1;0_22:2;0	PE	GPL	MEM	40	3	3	0	0
PE 18:1;0_22:3;0	PE	GPL	MEM	40	4	4	0	0
PE 18:1;0_22:4;0	PE	GPL	MEM	40	5	5	0	1.39875
PE 18:1;0_22:5;0	PE	GPL	MEM	40	6	6	0	3.58194
PE 18:1;0_22:6;0	PE	GPL	MEM	40	7	7	0	0
PE 18:1;0_24:0;0	PE	GPL	MEM	42	1	1	0	0.418355
PE 18:1;0_24:1;0	PE	GPL	MEM	42	2	2	0	0
PE 18:2;0_18:2;0	PE	GPL	MEM	36	4	4	0	0.0824752
PE 18:2;0_19:1;0	PE	GPL	MEM	37	3	3	0	0
PE 18:2;0_20:1;0	PE	GPL	MEM	38	3	3	0	0
PE 18:2;0_20:2;0	PE	GPL	MEM	38	4	4	0	0
PE 18:2;0_20:3;0	PE	GPL	MEM	38	5	5	0	0
PE 18:2;0_20:4;0	PE	GPL	MEM	38	6	6	0	0
PE 18:2;0_22:0;0	PE	GPL	MEM	40	2	2	0	0
PE 18:2;0_22:4;0	PE	GPL	MEM	40	6	6	0	0
PE 18:2;0_22:5;0	PE	GPL	MEM	40	7	7	0	0
PE 18:2;0_24:0;0	PE	GPL	MEM	42	2	2	0	0
PE 19:0;0_20:4;0	PE	GPL	MEM	39	4	4	0	0
PE 19:1;0_20:4;0	PE	GPL	MEM	39	5	5	0	0
PE 19:1;0_22:5;0	PE	GPL	MEM	41	6	6	0	0
PE 19:1;0_22:6;0	PE	GPL	MEM	41	7	7	0	0
PE 20:0;0_20:4;0	PE	GPL	MEM	40	4	4	0	0
PE 20:1;0_20:1;0	PE	GPL	MEM	40	2	2	0	0
PE 20:1;0_20:2;0	PE	GPL	MEM	40	3	3	0	0
PE 20:1;0_20:3;0	PE	GPL	MEM	40	4	4	0	0
PE 20:1;0_20:4;0	PE	GPL	MEM	40	5	5	0	0.152892
PE 20:1;0_22:6;0	PE	GPL	MEM	42	7	7	0	0
PE 20:2;0_20:2;0	PE	GPL	MEM	40	4	4	0	0
PE 20:2;0_20:3;0	PE	GPL	MEM	40	5	5	0	0
PE 20:2;0_20:4;0	PE	GPL	MEM	40	6	6	0	0
PE 20:2;0_22:5;0	PE	GPL	MEM	42	7	7	0	0
PE 20:3;0_20:3;0	PE	GPL	MEM	40	6	6	0	0
PE 20:3;0_20:4;0	PE	GPL	MEM	40	7	7	0	0
PE 20:4;0_20:4;0	PE	GPL	MEM	40	8	8	0	0
PE 20:4;0_24:0;0	PE	GPL	MEM	44	4	4	0	0
PE 20:4;0_24:1;0	PE	GPL	MEM	44	5	5	0	0
PE 22:5;0_24:1;0	PE	GPL	MEM	46	6	6	0	0
PE 22:6;0_22:6;0	PE	GPL	MEM	44	12	12	0	0
PE 22:6;0_24:0;0	PE	GPL	MEM	46	6	6	0	0
PE 22:6;0_24:1;0	PE	GPL	MEM	46	7	7	0	0
PE O-16:0;0/16:1;0	PE O-	GPL	MEM	32	1	0	0	0
PE O-16:0;0/17:1;0	PE O-	GPL	MEM	33	1	0	0	0
PE O-16:0;0/18:0;0	PE O-	GPL	MEM	34	0	0	0	0
PE O-16:0;0/18:1;0	PE O-	GPL	MEM	34	1	0	0	0.164387
PE O-16:0;0/18:2;0	PE O-	GPL	MEM	34	2	1	0	0
PE O-16:0;0/19:1;0	PE O-	GPL	MEM	35	1	0	0	0
PE O-16:0;0/20:1;0	PE O-	GPL	MEM	36	1	0	0	0.0788752
PE O-16:0;0/20:2;0	PE O-	GPL	MEM	36	2	1	0	0
PE O-16:0;0/20:3;0	PE O-	GPL	MEM	36	3	2	0	0.0371671
PE O-16:0;0/20:4;0	PE O-	GPL	MEM	36	4	3	0	0.161505
PE O-16:0;0/20:5;0	PE O-	GPL	MEM	36	5	4	0	0
PE O-16:0;0/22:1;0	PE O-	GPL	MEM	38	1	0	0	0
PE O-16:0;0/22:2;0	PE O-	GPL	MEM	38	2	1	0	0
PE O-16:0;0/22:3;0	PE O-	GPL	MEM	38	3	2	0	0
PE O-16:0;0/22:4;0	PE O-	GPL	MEM	38	4	3	0	0.0429307
PE O-16:0;0/22:5;0	PE O-	GPL	MEM	38	5	4	0	0.0265354
PE O-16:0;0/22:6;0	PE O-	GPL	MEM	38	6	5	0	0
PE O-16:0;0/24:4;0	PE O-	GPL	MEM	40	4	3	0	0
PE O-16:0;0/24:5;0	PE O-	GPL	MEM	40	5	4	0	0
PE O-16:0;0/24:6;0	PE O-	GPL	MEM	40	6	5	0	0
PE O-16:1;0/16:0;0	PE O-	GPL	MEM	32	1	0	0	0
PE O-16:1;0/16:1;0	PE O-	GPL	MEM	32	2	1	0	0
PE O-16:1;0/17:0;0	PE O-	GPL	MEM	33	1	0	0	0
PE O-16:1;0/17:1;0	PE O-	GPL	MEM	33	2	1	0	0
PE O-16:1;0/18:0;0	PE O-	GPL	MEM	34	1	0	0	0.109345
PE O-16:1;0/18:1;0	PE O-	GPL	MEM	34	2	1	0	5.65611
PE O-16:1;0/18:2;0	PE O-	GPL	MEM	34	3	2	0	0.790099
PE O-16:1;0/18:3;0	PE O-	GPL	MEM	34	4	3	0	0
PE O-16:1;0/19:1;0	PE O-	GPL	MEM	35	2	1	0	0.0273823
PE O-16:1;0/19:2;0	PE O-	GPL	MEM	35	3	2	0	0
PE O-16:1;0/20:0;0	PE O-	GPL	MEM	36	1	0	0	0.0280808
PE O-16:1;0/20:1;0	PE O-	GPL	MEM	36	2	1	0	1.31019
PE O-16:1;0/20:2;0	PE O-	GPL	MEM	36	3	2	0	0.31163
PE O-16:1;0/20:3;0	PE O-	GPL	MEM	36	4	3	0	1.04266
PE O-16:1;0/20:4;0	PE O-	GPL	MEM	36	5	4	0	9.46805
PE O-16:1;0/20:5;0	PE O-	GPL	MEM	36	6	5	0	0.860384
PE O-16:1;0/21:1;0	PE O-	GPL	MEM	37	2	1	0	0
PE O-16:1;0/21:2;0	PE O-	GPL	MEM	37	3	2	0	0
PE O-16:1;0/21:3;0	PE O-	GPL	MEM	37	4	3	0	0
PE O-16:1;0/22:1;0	PE O-	GPL	MEM	38	2	1	0	0.270381
PE O-16:1;0/22:2;0	PE O-	GPL	MEM	38	3	2	0	0.145596
PE O-16:1;0/22:3;0	PE O-	GPL	MEM	38	4	3	0	0.212703
PE O-16:1;0/22:4;0	PE O-	GPL	MEM	38	5	4	0	0.574687
PE O-16:1;0/22:5;0	PE O-	GPL	MEM	38	6	5	0	3.68011
PE O-16:1;0/22:6;0	PE O-	GPL	MEM	38	7	6	0	3.74877
PE O-16:1;0/23:3;0	PE O-	GPL	MEM	39	4	3	0	0
PE O-16:1;0/24:1;0	PE O-	GPL	MEM	40	2	1	0	0
PE O-16:1;0/24:2;0	PE O-	GPL	MEM	40	3	2	0	0
PE O-16:1;0/24:3;0	PE O-	GPL	MEM	40	4	3	0	0
PE O-16:1;0/24:4;0	PE O-	GPL	MEM	40	5	4	0	0.32479
PE O-16:1;0/24:5;0	PE O-	GPL	MEM	40	6	5	0	0.107137
PE O-16:1;0/24:6;0	PE O-	GPL	MEM	40	7	6	0	0
PE O-16:2;0/16:0;0	PE O-	GPL	MEM	32	2	1	0	0
PE O-16:2;0/16:1;0	PE O-	GPL	MEM	32	3	2	0	0
PE O-16:2;0/18:0;0	PE O-	GPL	MEM	34	2	1	0	0.186275
PE O-16:2;0/18:1;0	PE O-	GPL	MEM	34	3	2	0	0.206469
PE O-16:2;0/20:1;0	PE O-	GPL	MEM	36	3	2	0	0
PE O-16:2;0/20:2;0	PE O-	GPL	MEM	36	4	3	0	0
PE O-16:2;0/20:4;0	PE O-	GPL	MEM	36	6	5	0	0
PE O-16:2;0/22:4;0	PE O-	GPL	MEM	38	6	5	0	0
PE O-17:0;0/16:1;0	PE O-	GPL	MEM	33	1	0	0	0
PE O-17:0;0/16:2;0	PE O-	GPL	MEM	33	2	1	0	0
PE O-17:0;0/17:0;0	PE O-	GPL	MEM	34	0	0	0	0
PE O-17:0;0/17:1;0	PE O-	GPL	MEM	34	1	0	0	0.0357214
PE O-17:0;0/18:1;0	PE O-	GPL	MEM	35	1	0	0	0
PE O-17:0;0/18:2;0	PE O-	GPL	MEM	35	2	1	0	0.106271
PE O-17:0;0/18:3;0	PE O-	GPL	MEM	35	3	2	0	0
PE O-17:0;0/19:1;0	PE O-	GPL	MEM	36	1	0	0	0
PE O-17:0;0/19:2;0	PE O-	GPL	MEM	36	2	1	0	0
PE O-17:0;0/20:2;0	PE O-	GPL	MEM	37	2	1	0	0
PE O-17:0;0/20:3;0	PE O-	GPL	MEM	37	3	2	0	0
PE O-17:0;0/20:4;0	PE O-	GPL	MEM	37	4	3	0	0
PE O-17:0;0/20:5;0	PE O-	GPL	MEM	37	5	4	0	0
PE O-17:0;0/22:4;0	PE O-	GPL	MEM	39	4	3	0	0
PE O-17:0;0/22:5;0	PE O-	GPL	MEM	39	5	4	0	0
PE O-17:0;0/22:6;0	PE O-	GPL	MEM	39	6	5	0	0
PE O-17:1;0/15:0;0	PE O-	GPL	MEM	32	1	0	0	0
PE O-17:1;0/16:0;0	PE O-	GPL	MEM	33	1	0	0	0
PE O-17:1;0/16:1;0	PE O-	GPL	MEM	33	2	1	0	0
PE O-17:1;0/17:0;0	PE O-	GPL	MEM	34	1	0	0	0.00774225
PE O-17:1;0/17:1;0	PE O-	GPL	MEM	34	2	1	0	0
PE O-17:1;0/18:0;0	PE O-	GPL	MEM	35	1	0	0	0
PE O-17:1;0/18:1;0	PE O-	GPL	MEM	35	2	1	0	0.336307
PE O-17:1;0/18:2;0	PE O-	GPL	MEM	35	3	2	0	0
PE O-17:1;0/19:1;0	PE O-	GPL	MEM	36	2	1	0	0
PE O-17:1;0/20:1;0	PE O-	GPL	MEM	37	2	1	0	0
PE O-17:1;0/20:2;0	PE O-	GPL	MEM	37	3	2	0	0
PE O-17:1;0/20:3;0	PE O-	GPL	MEM	37	4	3	0	0
PE O-17:1;0/20:4;0	PE O-	GPL	MEM	37	5	4	0	0.64256
PE O-17:1;0/20:5;0	PE O-	GPL	MEM	37	6	5	0	0
PE O-17:1;0/21:2;0	PE O-	GPL	MEM	38	3	2	0	0
PE O-17:1;0/21:3;0	PE O-	GPL	MEM	38	4	3	0	0
PE O-17:1;0/22:2;0	PE O-	GPL	MEM	39	3	2	0	0
PE O-17:1;0/22:3;0	PE O-	GPL	MEM	39	4	3	0	0
PE O-17:1;0/22:4;0	PE O-	GPL	MEM	39	5	4	0	0
PE O-17:1;0/22:5;0	PE O-	GPL	MEM	39	6	5	0	0
PE O-17:1;0/22:6;0	PE O-	GPL	MEM	39	7	6	0	0
PE O-17:1;0/24:6;0	PE O-	GPL	MEM	41	7	6	0	0
PE O-17:2;0/16:0;0	PE O-	GPL	MEM	33	2	1	0	0
PE O-17:2;0/17:1;0	PE O-	GPL	MEM	34	3	2	0	0
PE O-17:2;0/18:0;0	PE O-	GPL	MEM	35	2	1	0	0.0425196
PE O-17:2;0/18:1;0	PE O-	GPL	MEM	35	3	2	0	0
PE O-17:2;0/20:1;0	PE O-	GPL	MEM	37	3	2	0	0
PE O-17:2;0/20:2;0	PE O-	GPL	MEM	37	4	3	0	0
PE O-17:2;0/20:3;0	PE O-	GPL	MEM	37	5	4	0	0
PE O-18:0;0/16:0;0	PE O-	GPL	MEM	34	0	0	0	0
PE O-18:0;0/16:1;0	PE O-	GPL	MEM	34	1	0	0	0.0105137
PE O-18:0;0/17:1;0	PE O-	GPL	MEM	35	1	0	0	0
PE O-18:0;0/18:1;0	PE O-	GPL	MEM	36	1	0	0	0.306513
PE O-18:0;0/18:2;0	PE O-	GPL	MEM	36	2	1	0	0.0462915
PE O-18:0;0/20:1;0	PE O-	GPL	MEM	38	1	0	0	0
PE O-18:0;0/20:2;0	PE O-	GPL	MEM	38	2	1	0	0
PE O-18:0;0/20:3;0	PE O-	GPL	MEM	38	3	2	0	0.0436649
PE O-18:0;0/20:4;0	PE O-	GPL	MEM	38	4	3	0	0.158589
PE O-18:0;0/20:5;0	PE O-	GPL	MEM	38	5	4	0	0
PE O-18:0;0/22:2;0	PE O-	GPL	MEM	40	2	1	0	0
PE O-18:0;0/22:3;0	PE O-	GPL	MEM	40	3	2	0	0
PE O-18:0;0/22:4;0	PE O-	GPL	MEM	40	4	3	0	0
PE O-18:0;0/22:5;0	PE O-	GPL	MEM	40	5	4	0	0
PE O-18:0;0/22:6;0	PE O-	GPL	MEM	40	6	5	0	0
PE O-18:0;0/24:4;0	PE O-	GPL	MEM	42	4	3	0	0
PE O-18:0;0/24:5;0	PE O-	GPL	MEM	42	5	4	0	0
PE O-18:0;0/24:6;0	PE O-	GPL	MEM	42	6	5	0	0
PE O-18:1;0/14:0;0	PE O-	GPL	MEM	32	1	0	0	0
PE O-18:1;0/14:1;0	PE O-	GPL	MEM	32	2	1	0	0
PE O-18:1;0/15:0;0	PE O-	GPL	MEM	33	1	0	0	0
PE O-18:1;0/15:1;0	PE O-	GPL	MEM	33	2	1	0	0
PE O-18:1;0/16:0;0	PE O-	GPL	MEM	34	1	0	0	0.112714
PE O-18:1;0/16:1;0	PE O-	GPL	MEM	34	2	1	0	0.267647
PE O-18:1;0/17:0;0	PE O-	GPL	MEM	35	1	0	0	0
PE O-18:1;0/17:1;0	PE O-	GPL	MEM	35	2	1	0	0.0110791
PE O-18:1;0/18:0;0	PE O-	GPL	MEM	36	1	0	0	0.0756887
PE O-18:1;0/18:1;0	PE O-	GPL	MEM	36	2	1	0	2.87851
PE O-18:1;0/18:2;0	PE O-	GPL	MEM	36	3	2	0	0.592156
PE O-18:1;0/18:3;0	PE O-	GPL	MEM	36	4	3	0	0
PE O-18:1;0/19:1;0	PE O-	GPL	MEM	37	2	1	0	0
PE O-18:1;0/19:2;0	PE O-	GPL	MEM	37	3	2	0	0
PE O-18:1;0/19:3;0	PE O-	GPL	MEM	37	4	3	0	0
PE O-18:1;0/20:0;0	PE O-	GPL	MEM	38	1	0	0	0
PE O-18:1;0/20:1;0	PE O-	GPL	MEM	38	2	1	0	0.6633
PE O-18:1;0/20:2;0	PE O-	GPL	MEM	38	3	2	0	0.15278
PE O-18:1;0/20:3;0	PE O-	GPL	MEM	38	4	3	0	0.404445
PE O-18:1;0/20:4;0	PE O-	GPL	MEM	38	5	4	0	0.590292
PE O-18:1;0/20:5;0	PE O-	GPL	MEM	38	6	5	0	0.164287
PE O-18:1;0/21:2;0	PE O-	GPL	MEM	39	3	2	0	0
PE O-18:1;0/21:3;0	PE O-	GPL	MEM	39	4	3	0	0
PE O-18:1;0/22:1;0	PE O-	GPL	MEM	40	2	1	0	0
PE O-18:1;0/22:2;0	PE O-	GPL	MEM	40	3	2	0	0
PE O-18:1;0/22:3;0	PE O-	GPL	MEM	40	4	3	0	0
PE O-18:1;0/22:4;0	PE O-	GPL	MEM	40	5	4	0	0.961874
PE O-18:1;0/22:5;0	PE O-	GPL	MEM	40	6	5	0	1.29154
PE O-18:1;0/22:6;0	PE O-	GPL	MEM	40	7	6	0	0.792637
PE O-18:1;0/24:1;0	PE O-	GPL	MEM	42	2	1	0	0
PE O-18:1;0/24:2;0	PE O-	GPL	MEM	42	3	2	0	0
PE O-18:1;0/24:3;0	PE O-	GPL	MEM	42	4	3	0	0
PE O-18:1;0/24:4;0	PE O-	GPL	MEM	42	5	4	0	0
PE O-18:1;0/24:5;0	PE O-	GPL	MEM	42	6	5	0	0
PE O-18:1;0/24:6;0	PE O-	GPL	MEM	42	7	6	0	0
PE O-18:2;0/14:0;0	PE O-	GPL	MEM	32	2	1	0	0
PE O-18:2;0/15:0;0	PE O-	GPL	MEM	33	2	1	0	0
PE O-18:2;0/16:0;0	PE O-	GPL	MEM	34	2	1	0	1.051
PE O-18:2;0/16:1;0	PE O-	GPL	MEM	34	3	2	0	0.521344
PE O-18:2;0/17:0;0	PE O-	GPL	MEM	35	2	1	0	0
PE O-18:2;0/17:1;0	PE O-	GPL	MEM	35	3	2	0	0
PE O-18:2;0/18:0;0	PE O-	GPL	MEM	36	2	1	0	0.343423
PE O-18:2;0/18:1;0	PE O-	GPL	MEM	36	3	2	0	4.36985
PE O-18:2;0/18:2;0	PE O-	GPL	MEM	36	4	3	0	0.682739
PE O-18:2;0/18:3;0	PE O-	GPL	MEM	36	5	4	0	0
PE O-18:2;0/19:1;0	PE O-	GPL	MEM	37	3	2	0	0
PE O-18:2;0/19:2;0	PE O-	GPL	MEM	37	4	3	0	0
PE O-18:2;0/20:0;0	PE O-	GPL	MEM	38	2	1	0	0.0621021
PE O-18:2;0/20:1;0	PE O-	GPL	MEM	38	3	2	0	0.792353
PE O-18:2;0/20:2;0	PE O-	GPL	MEM	38	4	3	0	0.179691
PE O-18:2;0/20:3;0	PE O-	GPL	MEM	38	5	4	0	0.232003
PE O-18:2;0/20:4;0	PE O-	GPL	MEM	38	6	5	0	5.83672
PE O-18:2;0/20:5;0	PE O-	GPL	MEM	38	7	6	0	1.23107
PE O-18:2;0/21:1;0	PE O-	GPL	MEM	39	3	2	0	0
PE O-18:2;0/21:2;0	PE O-	GPL	MEM	39	4	3	0	0
PE O-18:2;0/21:3;0	PE O-	GPL	MEM	39	5	4	0	0
PE O-18:2;0/22:1;0	PE O-	GPL	MEM	40	3	2	0	0
PE O-18:2;0/22:2;0	PE O-	GPL	MEM	40	4	3	0	0
PE O-18:2;0/22:3;0	PE O-	GPL	MEM	40	5	4	0	0.150423
PE O-18:2;0/22:4;0	PE O-	GPL	MEM	40	6	5	0	1.71664
PE O-18:2;0/22:5;0	PE O-	GPL	MEM	40	7	6	0	2.67193
PE O-18:2;0/22:6;0	PE O-	GPL	MEM	40	8	7	0	2.86573
PE O-18:2;0/24:1;0	PE O-	GPL	MEM	42	3	2	0	0
PE O-18:2;0/24:3;0	PE O-	GPL	MEM	42	5	4	0	0
PE O-18:2;0/24:4;0	PE O-	GPL	MEM	42	6	5	0	0
PE O-18:2;0/24:5;0	PE O-	GPL	MEM	42	7	6	0	0
PE O-18:2;0/24:6;0	PE O-	GPL	MEM	42	8	7	0	0
PG 14:0;0_18:1;0	PG	GPL	MEM	32	1	1	0	0
PG 16:0;0_16:0;0	PG	GPL	MEM	32	0	0	0	0
PG 16:0;0_16:1;0	PG	GPL	MEM	32	1	1	0	0
PG 16:0;0_18:0;0	PG	GPL	MEM	34	0	0	0	0
PG 16:0;0_18:1;0	PG	GPL	MEM	34	1	1	0	1.46884
PG 16:0;0_18:2;0	PG	GPL	MEM	34	2	2	0	0.0691595
PG 16:0;0_19:1;0	PG	GPL	MEM	35	1	1	0	0
PG 16:0;0_20:1;0	PG	GPL	MEM	36	1	1	0	0
PG 16:0;0_20:2;0	PG	GPL	MEM	36	2	2	0	0
PG 16:0;0_20:3;0	PG	GPL	MEM	36	3	3	0	0
PG 16:1;0_17:0;0	PG	GPL	MEM	33	1	1	0	0
PG 16:1;0_18:0;0	PG	GPL	MEM	34	1	1	0	0.180397
PG 16:1;0_18:1;0	PG	GPL	MEM	34	2	2	0	1.03213
PG 16:1;0_20:1;0	PG	GPL	MEM	36	2	2	0	0
PG 16:1;0_20:2;0	PG	GPL	MEM	36	3	3	0	0
PG 16:1;0_22:3;0	PG	GPL	MEM	38	4	4	0	0
PG 16:1;0_22:4;0	PG	GPL	MEM	38	5	5	0	0
PG 16:1;0_22:5;0	PG	GPL	MEM	38	6	6	0	0
PG 16:2;0_22:5;0	PG	GPL	MEM	38	7	7	0	0
PG 17:0;0_17:1;0	PG	GPL	MEM	34	1	1	0	0
PG 17:0;0_18:1;0	PG	GPL	MEM	35	1	1	0	0
PG 17:0;0_19:0;0	PG	GPL	MEM	36	0	0	0	0
PG 17:1;0_17:1;0	PG	GPL	MEM	34	2	2	0	0.00586727
PG 17:1;0_18:0;0	PG	GPL	MEM	35	1	1	0	0
PG 17:1;0_18:1;0	PG	GPL	MEM	35	2	2	0	0.307576
PG 18:0;0_18:0;0	PG	GPL	MEM	36	0	0	0	0
PG 18:0;0_18:1;0	PG	GPL	MEM	36	1	1	0	0.866664
PG 18:0;0_18:2;0	PG	GPL	MEM	36	2	2	0	0.185228
PG 18:0;0_20:2;0	PG	GPL	MEM	38	2	2	0	0
PG 18:0;0_20:3;0	PG	GPL	MEM	38	3	3	0	0
PG 18:0;0_22:6;0	PG	GPL	MEM	40	6	6	0	0
PG 18:1;0_18:1;0	PG	GPL	MEM	36	2	2	0	4.99593
PG 18:1;0_18:2;0	PG	GPL	MEM	36	3	3	0	0.920709
PG 18:1;0_19:1;0	PG	GPL	MEM	37	2	2	0	0
PG 18:1;0_20:1;0	PG	GPL	MEM	38	2	2	0	0
PG 18:1;0_20:2;0	PG	GPL	MEM	38	3	3	0	0
PG 18:1;0_20:3;0	PG	GPL	MEM	38	4	4	0	0
PG 18:1;0_20:4;0	PG	GPL	MEM	38	5	5	0	0
PG 18:1;0_20:5;0	PG	GPL	MEM	38	6	6	0	0
PG 18:1;0_22:4;0	PG	GPL	MEM	40	5	5	0	0
PG 18:1;0_22:5;0	PG	GPL	MEM	40	6	6	0	0
PG 18:2;0_20:2;0	PG	GPL	MEM	38	4	4	0	0
PG 18:2;0_20:4;0	PG	GPL	MEM	38	6	6	0	0
PG 19:1;0_19:1;0	PG	GPL	MEM	38	2	2	0	0
PG 20:2;0_20:4;0	PG	GPL	MEM	40	6	6	0	0
PG 22:5;0_22:6;0	PG	GPL	MEM	44	11	11	0	0
PG 22:6;0_22:6;0	PG	GPL	MEM	44	12	12	0	0
PI 14:0;0_18:1;0	PI	GPL	MEM	32	1	1	0	0
PI 15:0;0_18:1;0	PI	GPL	MEM	33	1	1	0	0
PI 16:0;0_16:1;0	PI	GPL	MEM	32	1	1	0	0
PI 16:0;0_17:0;0	PI	GPL	MEM	33	0	0	0	0
PI 16:0;0_17:1;0	PI	GPL	MEM	33	1	1	0	0
PI 16:0;0_18:0;0	PI	GPL	MEM	34	0	0	0	0
PI 16:0;0_18:1;0	PI	GPL	MEM	34	1	1	0	3.40133
PI 16:0;0_18:2;0	PI	GPL	MEM	34	2	2	0	0
PI 16:0;0_19:1;0	PI	GPL	MEM	35	1	1	0	0
PI 16:0;0_20:1;0	PI	GPL	MEM	36	1	1	0	0
PI 16:0;0_20:2;0	PI	GPL	MEM	36	2	2	0	0
PI 16:0;0_20:3;0	PI	GPL	MEM	36	3	3	0	0
PI 16:0;0_20:4;0	PI	GPL	MEM	36	4	4	0	7.34681
PI 16:1;0_17:0;0	PI	GPL	MEM	33	1	1	0	0
PI 16:1;0_18:0;0	PI	GPL	MEM	34	1	1	0	0
PI 16:1;0_18:1;0	PI	GPL	MEM	34	2	2	0	0
PI 17:0;0_17:0;0	PI	GPL	MEM	34	0	0	0	0
PI 17:0;0_18:1;0	PI	GPL	MEM	35	1	1	0	0
PI 17:0;0_20:4;0	PI	GPL	MEM	37	4	4	0	0
PI 17:1;0_18:0;0	PI	GPL	MEM	35	1	1	0	0
PI 18:0;0_18:1;0	PI	GPL	MEM	36	1	1	0	2.56082
PI 18:0;0_18:2;0	PI	GPL	MEM	36	2	2	0	0
PI 18:0;0_19:2;0	PI	GPL	MEM	37	2	2	0	0
PI 18:0;0_20:1;0	PI	GPL	MEM	38	1	1	0	0
PI 18:0;0_20:2;0	PI	GPL	MEM	38	2	2	0	0
PI 18:0;0_20:3;0	PI	GPL	MEM	38	3	3	0	0
PI 18:0;0_20:4;0	PI	GPL	MEM	38	4	4	0	16.162
PI 18:0;0_20:5;0	PI	GPL	MEM	38	5	5	0	0
PI 18:0;0_22:3;0	PI	GPL	MEM	40	3	3	0	0
PI 18:0;0_22:4;0	PI	GPL	MEM	40	4	4	0	0
PI 18:0;0_22:5;0	PI	GPL	MEM	40	5	5	0	0
PI 18:0;0_22:6;0	PI	GPL	MEM	40	6	6	0	0
PI 18:1;0_18:1;0	PI	GPL	MEM	36	2	2	0	7.64598
PI 18:1;0_18:2;0	PI	GPL	MEM	36	3	3	0	0
PI 18:1;0_19:1;0	PI	GPL	MEM	37	2	2	0	0
PI 18:1;0_20:1;0	PI	GPL	MEM	38	2	2	0	0
PI 18:1;0_20:2;0	PI	GPL	MEM	38	3	3	0	0
PI 18:1;0_20:3;0	PI	GPL	MEM	38	4	4	0	0
PI 18:1;0_20:4;0	PI	GPL	MEM	38	5	5	0	3.56946
PI 18:2;0_18:2;0	PI	GPL	MEM	36	4	4	0	0
PI 20:2;0_20:2;0	PI	GPL	MEM	40	4	4	0	0
PS 16:0;0_16:1;0	PS	GPL	MEM	32	1	1	0	0
PS 16:0;0_17:1;0	PS	GPL	MEM	33	1	1	0	0
PS 16:0;0_18:0;0	PS	GPL	MEM	34	0	0	0	0
PS 16:0;0_18:1;0	PS	GPL	MEM	34	1	1	0	3.98028
PS 16:0;0_18:2;0	PS	GPL	MEM	34	2	2	0	0
PS 16:0;0_20:1;0	PS	GPL	MEM	36	1	1	0	0
PS 16:1;0_17:0;0	PS	GPL	MEM	33	1	1	0	0
PS 16:1;0_18:0;0	PS	GPL	MEM	34	1	1	0	2.71599
PS 16:1;0_18:1;0	PS	GPL	MEM	34	2	2	0	0
PS 16:1;0_19:0;0	PS	GPL	MEM	35	1	1	0	0
PS 16:1;0_20:0;0	PS	GPL	MEM	36	1	1	0	0
PS 16:1;0_20:1;0	PS	GPL	MEM	36	2	2	0	0
PS 16:1;0_22:0;0	PS	GPL	MEM	38	1	1	0	0
PS 16:1;0_22:1;0	PS	GPL	MEM	38	2	2	0	0
PS 16:1;0_24:0;0	PS	GPL	MEM	40	1	1	0	0
PS 16:1;0_24:1;0	PS	GPL	MEM	40	2	2	0	0
PS 17:0;0_17:1;0	PS	GPL	MEM	34	1	1	0	0
PS 17:0;0_18:1;0	PS	GPL	MEM	35	1	1	0	0
PS 17:0;0_18:2;0	PS	GPL	MEM	35	2	2	0	0
PS 17:1;0_18:0;0	PS	GPL	MEM	35	1	1	0	0
PS 17:1;0_18:1;0	PS	GPL	MEM	35	2	2	0	0
PS 18:0;0_18:1;0	PS	GPL	MEM	36	1	1	0	33.3514
PS 18:0;0_18:2;0	PS	GPL	MEM	36	2	2	0	3.84477
PS 18:0;0_20:1;0	PS	GPL	MEM	38	1	1	0	0
PS 18:0;0_20:2;0	PS	GPL	MEM	38	2	2	0	0
PS 18:0;0_20:3;0	PS	GPL	MEM	38	3	3	0	31.0131
PS 18:0;0_22:3;0	PS	GPL	MEM	40	3	3	0	0
PS 18:0;0_22:4;0	PS	GPL	MEM	40	4	4	0	4.38701
PS 18:0;0_22:5;0	PS	GPL	MEM	40	5	5	0	4.86728
PS 18:0;0_22:6;0	PS	GPL	MEM	40	6	6	0	0
PS 18:1;0_18:1;0	PS	GPL	MEM	36	2	2	0	4.26241
PS 18:1;0_18:2;0	PS	GPL	MEM	36	3	3	0	0
PS 18:1;0_19:0;0	PS	GPL	MEM	37	1	1	0	0
PS 18:1;0_19:1;0	PS	GPL	MEM	37	2	2	0	0
PS 18:1;0_20:0;0	PS	GPL	MEM	38	1	1	0	0
PS 18:1;0_20:1;0	PS	GPL	MEM	38	2	2	0	0
PS 18:1;0_20:2;0	PS	GPL	MEM	38	3	3	0	0
PS 18:1;0_21:0;0	PS	GPL	MEM	39	1	1	0	0
PS 18:1;0_21:1;0	PS	GPL	MEM	39	2	2	0	0
PS 18:1;0_22:0;0	PS	GPL	MEM	40	1	1	0	0
PS 18:1;0_22:1;0	PS	GPL	MEM	40	2	2	0	0
PS 18:1;0_22:2;0	PS	GPL	MEM	40	3	3	0	0
PS 18:1;0_23:0;0	PS	GPL	MEM	41	1	1	0	0
PS 18:1;0_24:0;0	PS	GPL	MEM	42	1	1	0	0
PS 18:1;0_24:1;0	PS	GPL	MEM	42	2	2	0	0
PS 19:1;0_19:1;0	PS	GPL	MEM	38	2	2	0	0
SM 32:1;2	SM	SL	MEM	32	1	0	2	1.85334
SM 34:0;2	SM	SL	MEM	34	0	0	2	0.906826
SM 34:1;2	SM	SL	MEM	34	1	0	2	77.8316
SM 34:1;3	SM	SL	MEM	34	1	0	3	0
SM 34:2;2	SM	SL	MEM	34	2	1	2	2.81229
SM 36:0;2	SM	SL	MEM	36	0	0	2	0
SM 36:1;2	SM	SL	MEM	36	1	0	2	1.25591
SM 36:2;2	SM	SL	MEM	36	2	1	2	0
SM 38:0;2	SM	SL	MEM	38	0	0	2	0
SM 38:1;2	SM	SL	MEM	38	1	0	2	0
SM 38:2;2	SM	SL	MEM	38	2	1	2	0
SM 40:0;2	SM	SL	MEM	40	0	0	2	0
SM 40:1;2	SM	SL	MEM	40	1	0	2	3.04104
SM 40:2;2	SM	SL	MEM	40	2	1	2	1.0746
SM 42:1;2	SM	SL	MEM	42	1	0	2	6.64294
SM 42:2;2	SM	SL	MEM	42	2	1	2	14.1231
SM 44:2;2	SM	SL	MEM	44	2	1	2	0
TAG 46:0;0	TAG	GL	STO	46	0	0	0	0
TAG 46:1;0	TAG	GL	STO	46	1	1	0	0
TAG 48:1;0	TAG	GL	STO	48	1	1	0	0
TAG 48:2;0	TAG	GL	STO	48	2	2	0	0
TAG 50:1;0	TAG	GL	STO	50	1	1	0	0
TAG 50:2;0	TAG	GL	STO	50	2	2	0	0
TAG 51:1;0	TAG	GL	STO	51	1	1	0	0
TAG 52:1;0	TAG	GL	STO	52	1	1	0	0
TAG 52:2;0	TAG	GL	STO	52	2	2	0	1.32406
TAG 52:3;0	TAG	GL	STO	52	3	3	0	0
TAG 52:4;0	TAG	GL	STO	52	4	4	0	0
TAG 54:1;0	TAG	GL	STO	54	1	1	0	0
TAG 54:2;0	TAG	GL	STO	54	2	2	0	0
TAG 54:3;0	TAG	GL	STO	54	3	3	0	0.870278
TAG 54:4;0	TAG	GL	STO	54	4	4	0	0
TAG 54:6;0	TAG	GL	STO	54	6	6	0	0
TAG 54:7;0	TAG	GL	STO	54	7	7	0	0
TAG 56:1;0	TAG	GL	STO	56	1	1	0	0
TAG 56:3;0	TAG	GL	STO	56	3	3	0	0
TAG 56:5;0	TAG	GL	STO	56	5	5	0	0
TAG 56:6;0	TAG	GL	STO	56	6	6	0	0
TAG 56:7;0	TAG	GL	STO	56	7	7	0	0
TAG 58:3;0	TAG	GL	STO	58	3	3	0	0
TAG 58:6;0	TAG	GL	STO	58	6	6	0	0
TAG 58:8;0	TAG	GL	STO	58	8	8	0	0
TAG 60:12;0	TAG	GL	STO	60	12	12	0	0
TAG 60:8;0	TAG	GL	STO	60	8	8	0	0
TAG 62:13;0	TAG	GL	STO	62	13	13	0	0

## Sheet: HCC
GD-20170208-HCC1806-DMSO control
pM lipids								HCC1806-DMSO-1	HCC1806-DMSO-2	HCC1806-DMSO-3
feature	class	structuralcategory	functio0lcategory	totallength	totaldb	dbcorr	totaloh	HCC1806-DMSO	HCC1806-DMSO	HCC1806-DMSO
CE 11:0;0	CE	STE	STO	11	0	0	0	0	0	0
CE 14:0;0	CE	STE	STO	14	0	0	0	4.20023	7.03746	0
CE 14:1;0	CE	STE	STO	14	1	1	0	0	0	0
CE 15:0;0	CE	STE	STO	15	0	0	0	0	0	0
CE 16:0;0	CE	STE	STO	16	0	0	0	31.9287	32.5662	38.9523
CE 16:1;0	CE	STE	STO	16	1	1	0	15.2809	14.0152	16.6808
CE 17:0;0	CE	STE	STO	17	0	0	0	3.92338	0	0
CE 17:1;0	CE	STE	STO	17	1	1	0	4.26377	0	0
CE 18:0;0	CE	STE	STO	18	0	0	0	12.6001	11.0677	14.4245
CE 18:1;0	CE	STE	STO	18	1	1	0	56.4164	59.1715	65.3234
CE 18:2;0	CE	STE	STO	18	2	2	0	11.1005	12.9138	11.6813
CE 19:0;0	CE	STE	STO	19	0	0	0	0	0	0
CE 20:1;0	CE	STE	STO	20	1	1	0	0	0	0
CE 20:2;0	CE	STE	STO	20	2	2	0	0	0	0
CE 20:3;0	CE	STE	STO	20	3	3	0	0	5.08994	0
CE 20:4;0	CE	STE	STO	20	4	4	0	10.3243	10.3185	10.8935
CE 21:0;0	CE	STE	STO	21	0	0	0	0	0	0
CE 22:0;0	CE	STE	STO	22	0	0	0	0	0	0
CE 22:4;0	CE	STE	STO	22	4	4	0	9.63881	8.64351	9.30297
CE 22:5;0	CE	STE	STO	22	5	5	0	4.2173	4.29684	0
CE 22:6;0	CE	STE	STO	22	6	6	0	4.03035	6.1057	4.73646
CE 23:0;0	CE	STE	STO	23	0	0	0	0	0	0
CE 24:0;0	CE	STE	STO	24	0	0	0	0	0	0
CE 24:1;0	CE	STE	STO	24	1	1	0	0	0	0
CE 24:4;0	CE	STE	STO	24	4	4	0	0	0	0
CE 24:5;0	CE	STE	STO	24	5	5	0	0	0	0
Cer 32:0;1	Cer	SL	MEM	32	0	0	1	0	0	0
Cer 32:1;1	Cer	SL	MEM	32	1	1	1	0	0	0
Cer 32:1;2	Cer	SL	MEM	32	1	1	2	0	0	0
Cer 34:0;1	Cer	SL	MEM	34	0	0	1	0	0	0
Cer 34:0;2	Cer	SL	MEM	34	0	0	2	1.119	1.08706	1.20553
Cer 34:1;2	Cer	SL	MEM	34	1	1	2	4.71451	5.04781	5.22243
Cer 34:1;3	Cer	SL	MEM	34	1	1	3	0	0	0
Cer 34:2;2	Cer	SL	MEM	34	2	2	2	0.25264	0.317902	0.283234
Cer 36:0;2	Cer	SL	MEM	36	0	0	2	0	0	0
Cer 36:1;1	Cer	SL	MEM	36	1	1	1	0	0	0
Cer 36:1;2	Cer	SL	MEM	36	1	1	2	0.831554	0.753586	0.97615
Cer 36:1;3	Cer	SL	MEM	36	1	1	3	0	0	0
Cer 36:2;1	Cer	SL	MEM	36	2	2	1	0	0	0
Cer 36:2;3	Cer	SL	MEM	36	2	2	3	0	0	0
Cer 38:1;1	Cer	SL	MEM	38	1	1	1	0	0	0
Cer 38:1;2	Cer	SL	MEM	38	1	1	2	0	0	0.242356
Cer 38:1;3	Cer	SL	MEM	38	1	1	3	0	0	0
Cer 38:2;1	Cer	SL	MEM	38	2	2	1	0	0	0
Cer 38:2;3	Cer	SL	MEM	38	2	2	3	0	0	0
Cer 40:0;2	Cer	SL	MEM	40	0	0	2	0.415543	0.393739	0.388605
Cer 40:0;3	Cer	SL	MEM	40	0	0	3	0	0	0
Cer 40:1;2	Cer	SL	MEM	40	1	1	2	1.58445	1.61863	1.86528
Cer 40:1;3	Cer	SL	MEM	40	1	1	3	0	0	0
Cer 40:2;2	Cer	SL	MEM	40	2	2	2	0.35649	0.431554	0.40711
Cer 42:0;2	Cer	SL	MEM	42	0	0	2	1.04865	1.10538	1.0827
Cer 42:0;3	Cer	SL	MEM	42	0	0	3	0	0	0
Cer 42:1;2	Cer	SL	MEM	42	1	1	2	7.52941	8.13909	9.02287
Cer 42:1;3	Cer	SL	MEM	42	1	1	3	0	0	0
Cer 42:2;2	Cer	SL	MEM	42	2	2	2	4.21655	4.58031	4.60247
Cer 42:2;3	Cer	SL	MEM	42	2	2	3	0	0	0
Cer 44:0;2	Cer	SL	MEM	44	0	0	2	0	0	0
Cer 44:0;3	Cer	SL	MEM	44	0	0	3	0	0	0
Cer 44:1;2	Cer	SL	MEM	44	1	1	2	0.928598	0.908707	0.969726
Cer 44:1;3	Cer	SL	MEM	44	1	1	3	0	0	0
Cer 44:2;2	Cer	SL	MEM	44	2	2	2	0.961863	0.902221	1.09321
Chol	Chol	ST	MEM	27	1	1	0	1554.96	1603.4	1657.13
CL 68:2;0	CL	GPL	MEM	68	2	2	0	6.82055	8.02876	8.62023
CL 68:3;0	CL	GPL	MEM	68	3	3	0	0	2.51478	4.09706
CL 68:4;0	CL	GPL	MEM	68	4	4	0	0	0	0
CL 70:2;0	CL	GPL	MEM	70	2	2	0	0	0	0
CL 70:3;0	CL	GPL	MEM	70	3	3	0	0	0	0
CL 70:4;0	CL	GPL	MEM	70	4	4	0	4.36483	7.39901	7.06158
CL 70:5;0	CL	GPL	MEM	70	5	5	0	4.22444	4.85969	6.06233
CL 70:6;0	CL	GPL	MEM	70	6	6	0	0	2.8085	4.92834
CL 72:2;0	CL	GPL	MEM	72	2	2	0	0	0	0
CL 72:3;0	CL	GPL	MEM	72	3	3	0	0	0	0
CL 72:4;0	CL	GPL	MEM	72	4	4	0	0	0	0
CL 72:5;0	CL	GPL	MEM	72	5	5	0	0	5.8744	0
CL 72:6;0	CL	GPL	MEM	72	6	6	0	8.62451	9.34249	9.0986
CL 72:7;0	CL	GPL	MEM	72	7	7	0	3.98324	3.81635	3.83143
CL 72:8;0	CL	GPL	MEM	72	8	8	0	0	0	0
CL 74:6;0	CL	GPL	MEM	74	6	6	0	0	0	0
CL 74:9;0	CL	GPL	MEM	74	9	9	0	0	0	4.01086
CL 76:0;0	CL	GPL	MEM	76	0	0	0	0	0	0
DAG 12:0;0-18:0;0	DAG	GL	MEM	30	0	0	0	0	0	0
DAG 12:0;0-18:1;0	DAG	GL	MEM	30	1	1	0	0	0	0
DAG 13:0;0-18:1;0	DAG	GL	MEM	31	1	1	0	0	0	0
DAG 14:0;0-16:0;0	DAG	GL	MEM	30	0	0	0	0	0	0
DAG 14:0;0-16:1;0	DAG	GL	MEM	30	1	1	0	0	0	0
DAG 14:0;0-17:0;0	DAG	GL	MEM	31	0	0	0	0	0	0
DAG 14:0;0-17:1;0	DAG	GL	MEM	31	1	1	0	0	0	0
DAG 14:0;0-18:0;0	DAG	GL	MEM	32	0	0	0	0.789072	0.769974	0.758813
DAG 14:0;0-18:1;0	DAG	GL	MEM	32	1	1	0	1.2949	1.32411	1.40326
DAG 14:0;0-18:2;0	DAG	GL	MEM	32	2	2	0	0	0	0
DAG 14:0;0-20:1;0	DAG	GL	MEM	34	1	1	0	0.0881569	0.0862264	0.0925306
DAG 14:0;0-20:2;0	DAG	GL	MEM	34	2	2	0	0	0	0
DAG 14:1;0-16:0;0	DAG	GL	MEM	30	1	1	0	0	0	0
DAG 15:0;0-15:0;0	DAG	GL	MEM	30	0	0	0	0	0	0
DAG 15:0;0-15:1;0	DAG	GL	MEM	30	1	1	0	0	0	0
DAG 15:0;0-16:0;0	DAG	GL	MEM	31	0	0	0	0	0	0
DAG 15:0;0-16:1;0	DAG	GL	MEM	31	1	1	0	0	0	0
DAG 15:0;0-17:0;0	DAG	GL	MEM	32	0	0	0	0	0	0
DAG 15:0;0-17:1;0	DAG	GL	MEM	32	1	1	0	0	0	0
DAG 15:0;0-18:0;0	DAG	GL	MEM	33	0	0	0	0	0	0
DAG 15:0;0-18:1;0	DAG	GL	MEM	33	1	1	0	0	0	0
DAG 15:1;0-16:0;0	DAG	GL	MEM	31	1	1	0	0	0	0
DAG 15:1;0-18:1;0	DAG	GL	MEM	33	2	2	0	0	0	0
DAG 16:0;0-16:0;0	DAG	GL	MEM	32	0	0	0	4.47603	4.39535	4.34818
DAG 16:0;0-16:1;0	DAG	GL	MEM	32	1	1	0	1.89566	2.17459	2.29727
DAG 16:0;0-17:0;0	DAG	GL	MEM	33	0	0	0	0	0	0
DAG 16:0;0-17:1;0	DAG	GL	MEM	33	1	1	0	0	0	0
DAG 16:0;0-18:0;0	DAG	GL	MEM	34	0	0	0	9.87579	10.8005	11.187
DAG 16:0;0-18:1;0	DAG	GL	MEM	34	1	1	0	14.0395	15.6767	16.5095
DAG 16:0;0-18:2;0	DAG	GL	MEM	34	2	2	0	1.4641	1.18093	1.65989
DAG 16:0;0-19:1;0	DAG	GL	MEM	35	1	1	0	0	0	0
DAG 16:0;0-20:1;0	DAG	GL	MEM	36	1	1	0	0.920471	1.01045	1.1141
DAG 16:0;0-20:2;0	DAG	GL	MEM	36	2	2	0	0.370114	0.422527	0.398482
DAG 16:0;0-20:3;0	DAG	GL	MEM	36	3	3	0	0.661244	0.813657	0.76684
DAG 16:0;0-20:4;0	DAG	GL	MEM	36	4	4	0	0	0	0
DAG 16:0;0-22:4;0	DAG	GL	MEM	38	4	4	0	0.825418	0.914767	1.00259
DAG 16:0;0-22:5;0	DAG	GL	MEM	38	5	5	0	0	0	0
DAG 16:0;0-24:4;0	DAG	GL	MEM	40	4	4	0	0	0	0.31905
DAG 16:1;0-16:1;0	DAG	GL	MEM	32	2	2	0	0	0	0
DAG 16:1;0-17:0;0	DAG	GL	MEM	33	1	1	0	0	0	0
DAG 16:1;0-17:1;0	DAG	GL	MEM	33	2	2	0	0	0	0
DAG 16:1;0-18:0;0	DAG	GL	MEM	34	1	1	0	1.30638	1.43599	1.51857
DAG 16:1;0-18:1;0	DAG	GL	MEM	34	2	2	0	1.45828	1.15481	1.58165
DAG 16:1;0-20:1;0	DAG	GL	MEM	36	2	2	0	0.0835285	0.145668	0.182866
DAG 16:1;0-20:2;0	DAG	GL	MEM	36	3	3	0	0	0	0
DAG 16:1;0-20:3;0	DAG	GL	MEM	36	4	4	0	0	0	0
DAG 16:1;0-22:4;0	DAG	GL	MEM	38	5	5	0	0	0	0
DAG 16:1;0-24:3;0	DAG	GL	MEM	40	4	4	0	0	0	0
DAG 17:0;0-17:1;0	DAG	GL	MEM	34	1	1	0	0	0	0
DAG 17:0;0-18:0;0	DAG	GL	MEM	35	0	0	0	0	0	0
DAG 17:0;0-18:1;0	DAG	GL	MEM	35	1	1	0	0	0	0
DAG 17:0;0-20:2;0	DAG	GL	MEM	37	2	2	0	0	0	0
DAG 17:1;0-17:1;0	DAG	GL	MEM	34	2	2	0	0	0	0
DAG 17:1;0-18:0;0	DAG	GL	MEM	35	1	1	0	0	0	0
DAG 18:0;0-18:0;0	DAG	GL	MEM	36	0	0	0	0	0	0
DAG 18:0;0-18:1;0	DAG	GL	MEM	36	1	1	0	8.81203	9.78425	10.5342
DAG 18:0;0-18:2;0	DAG	GL	MEM	36	2	2	0	1.74243	2.13043	2.01529
DAG 18:0;0-18:3;0	DAG	GL	MEM	36	3	3	0	0	0	0
DAG 18:0;0-19:2;0	DAG	GL	MEM	37	2	2	0	0	0	0
DAG 18:0;0-20:1;0	DAG	GL	MEM	38	1	1	0	0	0	0
DAG 18:0;0-20:2;0	DAG	GL	MEM	38	2	2	0	0.577605	0.887617	1.07675
DAG 18:0;0-20:3;0	DAG	GL	MEM	38	3	3	0	1.73563	2.15776	2.48286
DAG 18:0;0-20:4;0	DAG	GL	MEM	38	4	4	0	3.36811	3.40931	3.9043
DAG 18:0;0-22:4;0	DAG	GL	MEM	40	4	4	0	3.0611	2.49945	2.71204
DAG 18:0;0-22:5;0	DAG	GL	MEM	40	5	5	0	0.936497	0.739968	0
DAG 18:0;0-22:6;0	DAG	GL	MEM	40	6	6	0	0	0	0
DAG 18:1;0-18:1;0	DAG	GL	MEM	36	2	2	0	4.43057	5.99432	5.45916
DAG 18:1;0-18:2;0	DAG	GL	MEM	36	3	3	0	1.64597	1.85848	1.76736
DAG 18:1;0-18:3;0	DAG	GL	MEM	36	4	4	0	0	0	0
DAG 18:1;0-19:1;0	DAG	GL	MEM	37	2	2	0	2.48416	0	14.4507
DAG 18:1;0-20:1;0	DAG	GL	MEM	38	2	2	0	0.772885	1.31322	1.64502
DAG 18:1;0-20:2;0	DAG	GL	MEM	38	3	3	0	0	0	0
DAG 18:1;0-20:3;0	DAG	GL	MEM	38	4	4	0	0.545069	0.514407	0.623452
DAG 18:1;0-20:4;0	DAG	GL	MEM	38	5	5	0	0	0	0
DAG 18:1;0-22:0;0	DAG	GL	MEM	40	1	1	0	0	0	0
DAG 18:1;0-22:3;0	DAG	GL	MEM	40	4	4	0	0	0.122805	0
DAG 18:1;0-22:4;0	DAG	GL	MEM	40	5	5	0	1.0907	0.907408	0
DAG 18:1;0-22:5;0	DAG	GL	MEM	40	6	6	0	0	0	0
DAG 18:2;0-18:2;0	DAG	GL	MEM	36	4	4	0	0	0	0
DAG 18:2;0-20:2;0	DAG	GL	MEM	38	4	4	0	0	0	0
HexCer 34:0;2	HexCer	SL	MEM	34	0	0	2	0.430985	0	0
HexCer 34:0;3	HexCer	SL	MEM	34	0	0	3	0	0	0
HexCer 34:1;2	HexCer	SL	MEM	34	1	1	2	2.1875	2.30655	2.34561
HexCer 34:1;3	HexCer	SL	MEM	34	1	1	3	0	0	0
HexCer 36:1;2	HexCer	SL	MEM	36	1	1	2	0	0	0
HexCer 38:0;3	HexCer	SL	MEM	38	0	0	3	0	0	0
HexCer 38:1;2	HexCer	SL	MEM	38	1	1	2	0	0	0
HexCer 40:0;2	HexCer	SL	MEM	40	0	0	2	0	0	0
HexCer 40:0;3	HexCer	SL	MEM	40	0	0	3	0	0	0
HexCer 40:1;2	HexCer	SL	MEM	40	1	1	2	2.21575	2.38143	2.47881
HexCer 40:1;3	HexCer	SL	MEM	40	1	1	3	0	0	0
HexCer 42:0;2	HexCer	SL	MEM	42	0	0	2	0	0	0
HexCer 42:0;3	HexCer	SL	MEM	42	0	0	3	0	0	0
HexCer 42:1;2	HexCer	SL	MEM	42	1	1	2	8.2024	9.34949	9.42533
HexCer 42:1;3	HexCer	SL	MEM	42	1	1	3	1.32042	1.27839	1.5831
HexCer 42:1;4	HexCer	SL	MEM	42	1	1	4	0	0	0
HexCer 42:2;2	HexCer	SL	MEM	42	2	2	2	3.5909	4.19239	4.25396
HexCer 42:2;3	HexCer	SL	MEM	42	2	2	3	0.889088	1.36692	1.40878
HexCer 44:0;3	HexCer	SL	MEM	44	0	0	3	0	0	0
HexCer 44:1;3	HexCer	SL	MEM	44	1	1	3	0	0	0
HexCer 44:2;2	HexCer	SL	MEM	44	2	2	2	0.763951	0.469111	0.872658
HexCer 44:2;3	HexCer	SL	MEM	44	2	2	3	0	0	0
LPA 16:0;0	LPA	GPL	LYS	16	0	0	0	0	0	0
LPA 18:0;0	LPA	GPL	LYS	18	0	0	0	0	0	0
LPA 18:1;0	LPA	GPL	LYS	18	1	1	0	0	0	0
LPA 18:3;0	LPA	GPL	LYS	18	3	3	0	103.257	97.0307	72.4749
LPA 20:1;0	LPA	GPL	LYS	20	1	1	0	0	0	0
LPA 24:3;0	LPA	GPL	LYS	24	3	3	0	0	0	0
LPC 16:0;0	LPC	GPL	LYS	16	0	0	0	4.7652	5.03766	4.86422
LPC 18:0;0	LPC	GPL	LYS	18	0	0	0	3.59049	3.99856	4.40832
LPC 18:1;0	LPC	GPL	LYS	18	1	1	0	2.82034	3.58967	3.35398
LPC 22:5;0	LPC	GPL	LYS	22	5	5	0	0	0	0
LPC O- 16:0;0	LPC O-	GPL	LYS	16	0	0	0	0.696583	0.893454	1.03744
LPC O- 18:1;0	LPC O-	GPL	LYS	18	1	0	0	0	0.704424	0
LPE 14:1;0	LPE	GPL	LYS	14	1	1	0	0	0	0
LPE 16:0;0	LPE	GPL	LYS	16	0	0	0	0	0.209087	0
LPE 18:0;0	LPE	GPL	LYS	18	0	0	0	1.65798	1.86079	1.79667
LPE 18:1;0	LPE	GPL	LYS	18	1	1	0	0.560884	0.644636	0.595736
LPE 20:4;0	LPE	GPL	LYS	20	4	4	0	0.20288	0	0
LPE O- 16:1;0	LPE O-	GPL	LYS	16	1	0	0	1.09649	1.09905	1.08165
LPE O- 18:1;0	LPE O-	GPL	LYS	18	1	0	0	1.36693	1.4763	1.62898
LPI 18:0;0	LPI	GPL	LYS	18	0	0	0	0	0	0
LPI 18:1;0	LPI	GPL	LYS	18	1	1	0	0	0	0
LPI 20:4;0	LPI	GPL	LYS	20	4	4	0	0	0	0
LPS 16:1;0	LPS	GPL	LYS	16	1	1	0	0	0	0
LPS 18:1;0	LPS	GPL	LYS	18	1	1	0	0	0	0
LPS 18:2;0	LPS	GPL	LYS	18	2	2	0	0	0	0
LPS 20:3;0	LPS	GPL	LYS	20	3	3	0	0	0	0
PA 10:0;0-18:2;0	PA	GPL	MEM	28	2	2	0	0	0	0
PA 12:0;0-12:0;0	PA	GPL	MEM	24	0	0	0	0	0	0
PA 14:0;0-18:1;0	PA	GPL	MEM	32	1	1	0	0	0	0
PA 16:0;0-16:1;0	PA	GPL	MEM	32	1	1	0	0	0	0
PA 16:0;0-18:0;0	PA	GPL	MEM	34	0	0	0	0	0	0
PA 16:0;0-18:1;0	PA	GPL	MEM	34	1	1	0	0	6.97583	0
PA 16:0;0-18:2;0	PA	GPL	MEM	34	2	2	0	0	0	0
PA 16:0;0-20:1;0	PA	GPL	MEM	36	1	1	0	0	0	0
PA 16:0;0-20:2;0	PA	GPL	MEM	36	2	2	0	0	0	0
PA 16:0;0-20:3;0	PA	GPL	MEM	36	3	3	0	0	0	0
PA 16:0;0-20:4;0	PA	GPL	MEM	36	4	4	0	0	0	0
PA 16:1;0-16:1;0	PA	GPL	MEM	32	2	2	0	0	0	0
PA 16:1;0-18:0;0	PA	GPL	MEM	34	1	1	0	0	0.677039	0
PA 16:1;0-18:1;0	PA	GPL	MEM	34	2	2	0	0	0	0
PA 17:0;0-17:1;0	PA	GPL	MEM	34	1	1	0	0	0.711231	0
PA 17:0;0-18:0;0	PA	GPL	MEM	35	0	0	0	0	0	0
PA 17:1;0-17:1;0	PA	GPL	MEM	34	2	2	0	0	0	0
PA 18:0;0-18:1;0	PA	GPL	MEM	36	1	1	0	0	0	0
PA 18:0;0-18:2;0	PA	GPL	MEM	36	2	2	0	0	0	0
PA 18:0;0-20:2;0	PA	GPL	MEM	38	2	2	0	0	0	9.40915
PA 18:0;0-24:4;0	PA	GPL	MEM	42	4	4	0	0	8.97547	0
PA 18:1;0-18:1;0	PA	GPL	MEM	36	2	2	0	0	0	0
PA 18:1;0-18:2;0	PA	GPL	MEM	36	3	3	0	0	0	0
PA 18:2;0-18:2;0	PA	GPL	MEM	36	4	4	0	0	0	0
PC 12:0;0-16:0;0	PC	GPL	MEM	28	0	0	0	0.43326	0.559767	0.496968
PC 12:0;0-18:0;0	PC	GPL	MEM	30	0	0	0	0	0	1.36319
PC 12:0;0-22:4;0	PC	GPL	MEM	34	4	4	0	0	0.445622	0
PC 13:0;0-17:0;0	PC	GPL	MEM	30	0	0	0	0	0	0
PC 13:0;0-18:1;0	PC	GPL	MEM	31	1	1	0	0	0	0
PC 14:0;0-14:0;0	PC	GPL	MEM	28	0	0	0	1.35798	1.57463	1.36642
PC 14:0;0-16:0;0	PC	GPL	MEM	30	0	0	0	37.6442	40.136	40.1659
PC 14:0;0-17:0;0	PC	GPL	MEM	31	0	0	0	1.4374	1.32012	1.17117
PC 14:0;0-17:1;0	PC	GPL	MEM	31	1	1	0	0.402507	0.145872	0.233749
PC 14:0;0-18:0;0	PC	GPL	MEM	32	0	0	0	14.5403	14.601	15.5493
PC 14:0;0-18:1;0	PC	GPL	MEM	32	1	1	0	18.7184	19.5844	20.39
PC 14:0;0-18:2;0	PC	GPL	MEM	32	2	2	0	23.3852	14.8551	14.3557
PC 14:0;0-18:3;0	PC	GPL	MEM	32	3	3	0	0	0	0
PC 14:0;0-19:0;0	PC	GPL	MEM	33	0	0	0	0.059333	0.0601506	0.0786295
PC 14:0;0-19:1;0	PC	GPL	MEM	33	1	1	0	0.267682	0.297724	0.270097
PC 14:0;0-20:0;0	PC	GPL	MEM	34	0	0	0	0.71	0.658578	1.04225
PC 14:0;0-20:1;0	PC	GPL	MEM	34	1	1	0	1.30352	0.924336	1.75646
PC 14:0;0-20:2;0	PC	GPL	MEM	34	2	2	0	0.347564	0.369803	0.404935
PC 14:0;0-20:3;0	PC	GPL	MEM	34	3	3	0	0.702691	0.663408	0.74841
PC 14:0;0-20:4;0	PC	GPL	MEM	34	4	4	0	8.14213	4.49549	5.97188
PC 14:0;0-22:1;0	PC	GPL	MEM	36	1	1	0	0.178231	0	0
PC 14:0;0-22:3;0	PC	GPL	MEM	36	3	3	0	0	0	0
PC 14:0;0-22:4;0	PC	GPL	MEM	36	4	4	0	1.3612	1.39442	1.32883
PC 14:0;0-22:5;0	PC	GPL	MEM	36	5	5	0	1.7256	1.62689	1.81255
PC 14:0;0-22:6;0	PC	GPL	MEM	36	6	6	0	0	0	0
PC 14:0;0-24:1;0	PC	GPL	MEM	38	1	1	0	0	0	0
PC 14:0;0-24:4;0	PC	GPL	MEM	38	4	4	0	0	0	0.345818
PC 14:1;0-17:0;0	PC	GPL	MEM	31	1	1	0	0	0	0
PC 14:1;0-18:1;0	PC	GPL	MEM	32	2	2	0	0	0	0
PC 15:0;0-15:0;0	PC	GPL	MEM	30	0	0	0	0.997412	1.05722	1.00607
PC 15:0;0-16:0;0	PC	GPL	MEM	31	0	0	0	6.98515	7.42194	7.32444
PC 15:0;0-16:1;0	PC	GPL	MEM	31	1	1	0	1.75116	0.766777	1.16817
PC 15:0;0-17:0;0	PC	GPL	MEM	32	0	0	0	0.879855	1.07268	0.994316
PC 15:0;0-17:1;0	PC	GPL	MEM	32	1	1	0	1.51472	1.5537	1.67027
PC 15:0;0-18:0;0	PC	GPL	MEM	33	0	0	0	0.92611	0	0
PC 15:0;0-18:1;0	PC	GPL	MEM	33	1	1	0	20.1442	20.9057	22.8763
PC 15:0;0-18:2;0	PC	GPL	MEM	33	2	2	0	2.05237	2.00031	3.40377
PC 15:0;0-19:1;0	PC	GPL	MEM	34	1	1	0	0	0	0
PC 15:0;0-20:0;0	PC	GPL	MEM	35	0	0	0	0	0	0.00898129
PC 15:0;0-20:1;0	PC	GPL	MEM	35	1	1	0	0.641843	0.805147	0.799002
PC 15:0;0-20:2;0	PC	GPL	MEM	35	2	2	0	0.412213	0	0.477816
PC 15:0;0-20:3;0	PC	GPL	MEM	35	3	3	0	1.23663	1.32566	1.34941
PC 15:0;0-20:4;0	PC	GPL	MEM	35	4	4	0	3.50858	3.62426	3.38863
PC 15:0;0-21:1;0	PC	GPL	MEM	36	1	1	0	0	0	0
PC 15:0;0-22:0;0	PC	GPL	MEM	37	0	0	0	0	0	0
PC 15:0;0-22:1;0	PC	GPL	MEM	37	1	1	0	0	0	0
PC 15:0;0-22:3;0	PC	GPL	MEM	37	3	3	0	0	0	0
PC 15:0;0-22:4;0	PC	GPL	MEM	37	4	4	0	1.64441	1.55752	1.78055
PC 15:0;0-22:5;0	PC	GPL	MEM	37	5	5	0	0	0.846494	0.913935
PC 15:0;0-24:3;0	PC	GPL	MEM	39	3	3	0	0.576018	0	0
PC 15:0;0-24:4;0	PC	GPL	MEM	39	4	4	0	0	0	0.967839
PC 15:1;0-16:0;0	PC	GPL	MEM	31	1	1	0	0	0.932337	1.38181
PC 15:1;0-17:0;0	PC	GPL	MEM	32	1	1	0	0	0	0
PC 15:1;0-18:0;0	PC	GPL	MEM	33	1	1	0	0	0	0
PC 15:1;0-18:1;0	PC	GPL	MEM	33	2	2	0	0	0	0
PC 16:0;0-16:0;0	PC	GPL	MEM	32	0	0	0	67.2384	69.5334	75.0225
PC 16:0;0-16:1;0	PC	GPL	MEM	32	1	1	0	63.9994	66.8044	70.7284
PC 16:0;0-16:2;0	PC	GPL	MEM	32	2	2	0	15.545	10.3496	9.1976
PC 16:0;0-17:1;0	PC	GPL	MEM	33	1	1	0	21.1416	21.8467	24.7022
PC 16:0;0-17:2;0	PC	GPL	MEM	33	2	2	0	1.4418	1.17072	0
PC 16:0;0-18:0;0	PC	GPL	MEM	34	0	0	0	0	0	0
PC 16:0;0-18:1;0	PC	GPL	MEM	34	1	1	0	659.314	692.752	741.013
PC 16:0;0-18:2;0	PC	GPL	MEM	34	2	2	0	52.9463	53.6225	59.6395
PC 16:0;0-18:3;0	PC	GPL	MEM	34	3	3	0	2.54396	2.55378	3.23754
PC 16:0;0-19:0;0	PC	GPL	MEM	35	0	0	0	0	0	0.220177
PC 16:0;0-19:1;0	PC	GPL	MEM	35	1	1	0	6.83654	6.82563	7.49037
PC 16:0;0-19:2;0	PC	GPL	MEM	35	2	2	0	1.50471	1.67366	1.62698
PC 16:0;0-19:3;0	PC	GPL	MEM	35	3	3	0	0	0.291911	0
PC 16:0;0-20:0;0	PC	GPL	MEM	36	0	0	0	0	0	0
PC 16:0;0-20:1;0	PC	GPL	MEM	36	1	1	0	14.4487	14.9534	16.4428
PC 16:0;0-20:2;0	PC	GPL	MEM	36	2	2	0	9.19867	9.3772	10.4556
PC 16:0;0-20:3;0	PC	GPL	MEM	36	3	3	0	15.9561	17.0746	18.5969
PC 16:0;0-20:4;0	PC	GPL	MEM	36	4	4	0	42.9764	45.6114	48.366
PC 16:0;0-20:5;0	PC	GPL	MEM	36	5	5	0	6.47633	5.05061	5.82794
PC 16:0;0-20:6;0	PC	GPL	MEM	36	6	6	0	0	0	0
PC 16:0;0-21:1;0	PC	GPL	MEM	37	1	1	0	0.567079	0.616199	0.558958
PC 16:0;0-21:2;0	PC	GPL	MEM	37	2	2	0	0.663936	0.677323	0.788128
PC 16:0;0-21:3;0	PC	GPL	MEM	37	3	3	0	0.691241	0.687907	0.87889
PC 16:0;0-22:1;0	PC	GPL	MEM	38	1	1	0	1.55868	1.52392	1.59688
PC 16:0;0-22:2;0	PC	GPL	MEM	38	2	2	0	1.35558	1.21579	1.51468
PC 16:0;0-22:3;0	PC	GPL	MEM	38	3	3	0	3.73393	3.59842	4.17933
PC 16:0;0-22:4;0	PC	GPL	MEM	38	4	4	0	24.09	24.4965	26.5201
PC 16:0;0-22:5;0	PC	GPL	MEM	38	5	5	0	16.9058	16.8606	17.7357
PC 16:0;0-22:6;0	PC	GPL	MEM	38	6	6	0	8.59801	10.5278	9.96997
PC 16:0;0-23:2;0	PC	GPL	MEM	39	2	2	0	0	0	0
PC 16:0;0-24:1;0	PC	GPL	MEM	40	1	1	0	1.08977	1.46616	2.18494
PC 16:0;0-24:2;0	PC	GPL	MEM	40	2	2	0	0.685214	1.08755	1.10189
PC 16:0;0-24:3;0	PC	GPL	MEM	40	3	3	0	1.30128	1.34241	1.09636
PC 16:0;0-24:4;0	PC	GPL	MEM	40	4	4	0	5.02306	5.35791	5.60509
PC 16:0;0-24:5;0	PC	GPL	MEM	40	5	5	0	2.75194	2.99549	3.33935
PC 16:0;0-24:6;0	PC	GPL	MEM	40	6	6	0	0	1.70389	1.56079
PC 16:1;0-16:1;0	PC	GPL	MEM	32	2	2	0	27.1492	19.3868	18.5278
PC 16:1;0-16:2;0	PC	GPL	MEM	32	3	3	0	0	0	0
PC 16:1;0-17:0;0	PC	GPL	MEM	33	1	1	0	2.0975	2.14333	2.48445
PC 16:1;0-17:1;0	PC	GPL	MEM	33	2	2	0	1.25958	1.23034	2.23348
PC 16:1;0-18:0;0	PC	GPL	MEM	34	1	1	0	18.5845	19.1324	21.6282
PC 16:1;0-18:1;0	PC	GPL	MEM	34	2	2	0	35.8534	35.8077	39.6734
PC 16:1;0-18:2;0	PC	GPL	MEM	34	3	3	0	3.19304	3.09277	3.99581
PC 16:1;0-18:3;0	PC	GPL	MEM	34	4	4	0	0	0	0
PC 16:1;0-19:0;0	PC	GPL	MEM	35	1	1	0	0.360977	0	0
PC 16:1;0-19:1;0	PC	GPL	MEM	35	2	2	0	0.529535	0.706114	0.683331
PC 16:1;0-19:2;0	PC	GPL	MEM	35	3	3	0	0	0	0
PC 16:1;0-20:0;0	PC	GPL	MEM	36	1	1	0	0.770767	0.587837	0.723447
PC 16:1;0-20:1;0	PC	GPL	MEM	36	2	2	0	2.37808	2.68316	2.7424
PC 16:1;0-20:2;0	PC	GPL	MEM	36	3	3	0	0.971223	1.22457	1.36361
PC 16:1;0-20:3;0	PC	GPL	MEM	36	4	4	0	2.0924	1.96885	2.09056
PC 16:1;0-20:4;0	PC	GPL	MEM	36	5	5	0	7.4388	5.10252	5.46423
PC 16:1;0-22:1;0	PC	GPL	MEM	38	2	2	0	0.307462	0.335299	0.439546
PC 16:1;0-22:3;0	PC	GPL	MEM	38	4	4	0	0.589915	0.429804	0.739669
PC 16:1;0-22:4;0	PC	GPL	MEM	38	5	5	0	1.86474	1.83266	2.12143
PC 16:1;0-22:5;0	PC	GPL	MEM	38	6	6	0	1.0418	1.24465	1.44468
PC 16:1;0-24:0;0	PC	GPL	MEM	40	1	1	0	0	0	0.170573
PC 16:1;0-24:1;0	PC	GPL	MEM	40	2	2	0	0.151318	0	0.220555
PC 16:1;0-24:2;0	PC	GPL	MEM	40	3	3	0	0.0867745	0	0
PC 16:1;0-24:4;0	PC	GPL	MEM	40	5	5	0	0.452327	0.58428	0.604058
PC 16:2;0-17:0;0	PC	GPL	MEM	33	2	2	0	0	0	0
PC 16:2;0-17:1;0	PC	GPL	MEM	33	3	3	0	0	0	0
PC 16:2;0-18:0;0	PC	GPL	MEM	34	2	2	0	0.641765	0.494132	0.652175
PC 16:2;0-18:1;0	PC	GPL	MEM	34	3	3	0	1.04298	0.938784	0
PC 17:0;0-17:1;0	PC	GPL	MEM	34	1	1	0	1.29474	1.71035	1.14943
PC 17:0;0-17:2;0	PC	GPL	MEM	34	2	2	0	0	0	0
PC 17:0;0-18:0;0	PC	GPL	MEM	35	0	0	0	1.02557	1.21337	0.921175
PC 17:0;0-18:1;0	PC	GPL	MEM	35	1	1	0	28.2001	28.827	30.4494
PC 17:0;0-18:2;0	PC	GPL	MEM	35	2	2	0	3.31095	3.5516	3.59544
PC 17:0;0-18:3;0	PC	GPL	MEM	35	3	3	0	0	0	0
PC 17:0;0-19:0;0	PC	GPL	MEM	36	0	0	0	0	0	0
PC 17:0;0-19:1;0	PC	GPL	MEM	36	1	1	0	0	0.236748	0
PC 17:0;0-19:2;0	PC	GPL	MEM	36	2	2	0	0	0	0
PC 17:0;0-20:0;0	PC	GPL	MEM	37	0	0	0	0	0	0
PC 17:0;0-20:1;0	PC	GPL	MEM	37	1	1	0	0.384062	0.412193	0.390458
PC 17:0;0-20:2;0	PC	GPL	MEM	37	2	2	0	0.372458	0.427261	0.466789
PC 17:0;0-20:3;0	PC	GPL	MEM	37	3	3	0	1.38697	1.52878	1.7371
PC 17:0;0-20:4;0	PC	GPL	MEM	37	4	4	0	3.12205	2.82804	3.21776
PC 17:0;0-20:5;0	PC	GPL	MEM	37	5	5	0	0	0	0
PC 17:0;0-20:6;0	PC	GPL	MEM	37	6	6	0	0	0	0
PC 17:0;0-22:3;0	PC	GPL	MEM	39	3	3	0	0	0.23775	0.250003
PC 17:0;0-22:4;0	PC	GPL	MEM	39	4	4	0	1.28078	1.62349	1.17235
PC 17:0;0-22:5;0	PC	GPL	MEM	39	5	5	0	1.13389	1.42509	1.33018
PC 17:0;0-22:6;0	PC	GPL	MEM	39	6	6	0	0.289225	0.37872	0.353155
PC 17:1;0-17:1;0	PC	GPL	MEM	34	2	2	0	0.577165	0.55657	0.675537
PC 17:1;0-18:0;0	PC	GPL	MEM	35	1	1	0	5.55189	5.54102	5.89823
PC 17:1;0-18:1;0	PC	GPL	MEM	35	2	2	0	16.6791	17.7515	19.1995
PC 17:1;0-18:2;0	PC	GPL	MEM	35	3	3	0	1.59758	1.64826	1.74722
PC 17:1;0-19:1;0	PC	GPL	MEM	36	2	2	0	0.356527	0.262589	0.453328
PC 17:1;0-19:2;0	PC	GPL	MEM	36	3	3	0	0	0	0
PC 17:1;0-20:0;0	PC	GPL	MEM	37	1	1	0	0.086954	0	0.144268
PC 17:1;0-20:1;0	PC	GPL	MEM	37	2	2	0	0.870326	0.880584	0.95123
PC 17:1;0-20:2;0	PC	GPL	MEM	37	3	3	0	0.506754	0.408788	0.50564
PC 17:1;0-20:3;0	PC	GPL	MEM	37	4	4	0	1.05888	1.11942	1.2179
PC 17:1;0-20:4;0	PC	GPL	MEM	37	5	5	0	2.8727	2.15344	2.19093
PC 17:1;0-22:1;0	PC	GPL	MEM	39	2	2	0	0	0	0.0553891
PC 17:1;0-22:3;0	PC	GPL	MEM	39	4	4	0	0.205385	0.228811	0
PC 17:1;0-22:4;0	PC	GPL	MEM	39	5	5	0	1.71338	1.83013	1.82597
PC 17:1;0-22:5;0	PC	GPL	MEM	39	6	6	0	1.43898	1.28326	1.47217
PC 17:1;0-22:6;0	PC	GPL	MEM	39	7	7	0	0	0	0
PC 17:1;0-24:4;0	PC	GPL	MEM	41	5	5	0	0	0.686098	1.01723
PC 17:2;0-18:1;0	PC	GPL	MEM	35	3	3	0	0	0	0
PC 18:0;0-18:0;0	PC	GPL	MEM	36	0	0	0	0	0	0
PC 18:0;0-18:1;0	PC	GPL	MEM	36	1	1	0	190.352	202.204	218.36
PC 18:0;0-18:2;0	PC	GPL	MEM	36	2	2	0	38.0762	39.6232	42.1119
PC 18:0;0-18:3;0	PC	GPL	MEM	36	3	3	0	0.888827	1.0136	0.948824
PC 18:0;0-19:0;0	PC	GPL	MEM	37	0	0	0	0	0	0
PC 18:0;0-19:1;0	PC	GPL	MEM	37	1	1	0	1.01298	1.05226	0.984952
PC 18:0;0-19:2;0	PC	GPL	MEM	37	2	2	0	0.681957	0.775742	0.749031
PC 18:0;0-20:1;0	PC	GPL	MEM	38	1	1	0	1.74834	1.5376	1.73074
PC 18:0;0-20:2;0	PC	GPL	MEM	38	2	2	0	2.48348	2.55907	2.56479
PC 18:0;0-20:3;0	PC	GPL	MEM	38	3	3	0	9.72484	9.93348	11.1441
PC 18:0;0-20:4;0	PC	GPL	MEM	38	4	4	0	29.6692	31.4611	33.1153
PC 18:0;0-20:5;0	PC	GPL	MEM	38	5	5	0	2.39925	2.03153	2.10437
PC 18:0;0-21:2;0	PC	GPL	MEM	39	2	2	0	0	0	0.518015
PC 18:0;0-21:3;0	PC	GPL	MEM	39	3	3	0	1.1545	0.482622	0.303385
PC 18:0;0-22:1;0	PC	GPL	MEM	40	1	1	0	0.289185	0.406726	0.624558
PC 18:0;0-22:2;0	PC	GPL	MEM	40	2	2	0	0.223912	0.19828	0.283343
PC 18:0;0-22:3;0	PC	GPL	MEM	40	3	3	0	0.658476	0.589473	0.599912
PC 18:0;0-22:4;0	PC	GPL	MEM	40	4	4	0	5.57929	5.54103	6.18779
PC 18:0;0-22:5;0	PC	GPL	MEM	40	5	5	0	6.02203	6.90654	7.29296
PC 18:0;0-22:6;0	PC	GPL	MEM	40	6	6	0	4.96924	4.37928	5.13991
PC 18:0;0-24:0;0	PC	GPL	MEM	42	0	0	0	2.07113	0	1.37983
PC 18:0;0-24:1;0	PC	GPL	MEM	42	1	1	0	1.30723	1.38544	1.42614
PC 18:0;0-24:2;0	PC	GPL	MEM	42	2	2	0	0	0.642832	0.697795
PC 18:0;0-24:3;0	PC	GPL	MEM	42	3	3	0	0.990435	0.752564	0.738291
PC 18:0;0-24:4;0	PC	GPL	MEM	42	4	4	0	1.71973	2.01792	2.18543
PC 18:0;0-24:5;0	PC	GPL	MEM	42	5	5	0	0.452775	0.694825	0.673073
PC 18:1;0-18:1;0	PC	GPL	MEM	36	2	2	0	189.205	194.742	207.891
PC 18:1;0-18:2;0	PC	GPL	MEM	36	3	3	0	36.0698	36.7715	41.3522
PC 18:1;0-18:3;0	PC	GPL	MEM	36	4	4	0	3.1768	3.17524	3.18216
PC 18:1;0-19:0;0	PC	GPL	MEM	37	1	1	0	2.32623	2.56827	2.36767
PC 18:1;0-19:1;0	PC	GPL	MEM	37	2	2	0	7.39446	7.43972	8.431
PC 18:1;0-19:2;0	PC	GPL	MEM	37	3	3	0	1.61	1.90925	1.97893
PC 18:1;0-19:3;0	PC	GPL	MEM	37	4	4	0	0	0	0
PC 18:1;0-20:0;0	PC	GPL	MEM	38	1	1	0	3.7812	3.84452	3.87834
PC 18:1;0-20:1;0	PC	GPL	MEM	38	2	2	0	19.9204	19.6292	21.2145
PC 18:1;0-20:2;0	PC	GPL	MEM	38	3	3	0	9.37781	10.1458	11.3505
PC 18:1;0-20:3;0	PC	GPL	MEM	38	4	4	0	17.7332	19.1687	20.0698
PC 18:1;0-20:4;0	PC	GPL	MEM	38	5	5	0	23.8315	24.7876	25.3014
PC 18:1;0-20:5;0	PC	GPL	MEM	38	6	6	0	3.19969	2.78028	2.98436
PC 18:1;0-21:1;0	PC	GPL	MEM	39	2	2	0	1.19364	1.22433	0.664545
PC 18:1;0-21:2;0	PC	GPL	MEM	39	3	3	0	0	0.816336	0.815416
PC 18:1;0-21:3;0	PC	GPL	MEM	39	4	4	0	0.580187	0.653181	0.498053
PC 18:1;0-22:0;0	PC	GPL	MEM	40	1	1	0	0.627294	0.749126	0
PC 18:1;0-22:1;0	PC	GPL	MEM	40	2	2	0	1.93366	2.6604	2.89411
PC 18:1;0-22:2;0	PC	GPL	MEM	40	3	3	0	1.04403	0.995764	0.904115
PC 18:1;0-22:3;0	PC	GPL	MEM	40	4	4	0	3.48419	4.10392	4.15962
PC 18:1;0-22:4;0	PC	GPL	MEM	40	5	5	0	14.3271	15.183	16.8661
PC 18:1;0-22:5;0	PC	GPL	MEM	40	6	6	0	12.2398	12.1686	13.3849
PC 18:1;0-22:6;0	PC	GPL	MEM	40	7	7	0	8.42388	8.02803	9.33373
PC 18:1;0-24:0;0	PC	GPL	MEM	42	1	1	0	2.1645	2.29395	2.39918
PC 18:1;0-24:1;0	PC	GPL	MEM	42	2	2	0	3.53739	2.87689	2.65113
PC 18:1;0-24:2;0	PC	GPL	MEM	42	3	3	0	1.09965	0.839428	0.855717
PC 18:1;0-24:3;0	PC	GPL	MEM	42	4	4	0	2.31086	2.67983	2.44896
PC 18:1;0-24:4;0	PC	GPL	MEM	42	5	5	0	6.24007	6.02916	5.97142
PC 18:1;0-24:5;0	PC	GPL	MEM	42	6	6	0	1.89466	2.2114	2.7796
PC 18:2;0-18:2;0	PC	GPL	MEM	36	4	4	0	2.57446	2.57755	2.91864
PC 18:2;0-18:3;0	PC	GPL	MEM	36	5	5	0	0	0.541675	0
PC 18:2;0-19:0;0	PC	GPL	MEM	37	2	2	0	0.551797	0	0.685194
PC 18:2;0-19:1;0	PC	GPL	MEM	37	3	3	0	1.03598	0.961225	0.972639
PC 18:2;0-20:0;0	PC	GPL	MEM	38	2	2	0	0.926636	1.14684	1.08691
PC 18:2;0-20:1;0	PC	GPL	MEM	38	3	3	0	2.92025	3.20293	3.29708
PC 18:2;0-20:2;0	PC	GPL	MEM	38	4	4	0	2.45807	2.24203	2.32005
PC 18:2;0-20:3;0	PC	GPL	MEM	38	5	5	0	2.23787	2.20829	2.31371
PC 18:2;0-20:4;0	PC	GPL	MEM	38	6	6	0	2.19858	2.54925	2.9108
PC 18:2;0-22:0;0	PC	GPL	MEM	40	2	2	0	0.0572145	0	0
PC 18:2;0-22:1;0	PC	GPL	MEM	40	3	3	0	0.32356	0.343634	0.276027
PC 18:2;0-22:2;0	PC	GPL	MEM	40	4	4	0	0.121211	0.172307	0
PC 18:2;0-22:3;0	PC	GPL	MEM	40	5	5	0	0.562566	0.619447	0.712739
PC 18:2;0-22:4;0	PC	GPL	MEM	40	6	6	0	2.1905	2.20616	2.21962
PC 18:2;0-22:5;0	PC	GPL	MEM	40	7	7	0	0.956425	1.09564	1.09312
PC 18:2;0-24:0;0	PC	GPL	MEM	42	2	2	0	0	0	0.339893
PC 18:2;0-24:1;0	PC	GPL	MEM	42	3	3	0	0	0	0.330861
PC 18:2;0-24:2;0	PC	GPL	MEM	42	4	4	0	0	0	0
PC 18:2;0-24:3;0	PC	GPL	MEM	42	5	5	0	0	0	0.311092
PC 18:2;0-24:4;0	PC	GPL	MEM	42	6	6	0	0.843885	0.838425	0.974902
PC 18:2;0-24:5;0	PC	GPL	MEM	42	7	7	0	0	0	0
PC 19:0;0-20:3;0	PC	GPL	MEM	39	3	3	0	0	0	0.310374
PC 19:0;0-20:4;0	PC	GPL	MEM	39	4	4	0	0.625366	0.541208	0.504912
PC 19:1;0-19:1;0	PC	GPL	MEM	38	2	2	0	0	0	0
PC 19:1;0-20:1;0	PC	GPL	MEM	39	2	2	0	0.115844	0	0
PC 19:1;0-20:2;0	PC	GPL	MEM	39	3	3	0	0	0	0
PC 19:1;0-20:3;0	PC	GPL	MEM	39	4	4	0	0.288757	0	0.369276
PC 19:1;0-20:4;0	PC	GPL	MEM	39	5	5	0	0.746411	1.15838	1.19524
PC 19:1;0-22:4;0	PC	GPL	MEM	41	5	5	0	1.31419	0.493502	0.670057
PC 20:0;0-20:3;0	PC	GPL	MEM	40	3	3	0	0	0	0.173858
PC 20:0;0-20:4;0	PC	GPL	MEM	40	4	4	0	0.912005	0.864014	0.995327
PC 20:0;0-22:4;0	PC	GPL	MEM	42	4	4	0	0	0	0
PC 20:0;0-22:5;0	PC	GPL	MEM	42	5	5	0	0	0.170764	0
PC 20:1;0-20:1;0	PC	GPL	MEM	40	2	2	0	0.0519707	0.0636658	0.079302
PC 20:1;0-20:2;0	PC	GPL	MEM	40	3	3	0	0.133464	0	0.0982771
PC 20:1;0-20:3;0	PC	GPL	MEM	40	4	4	0	1.19908	1.13387	1.29851
PC 20:1;0-20:4;0	PC	GPL	MEM	40	5	5	0	2.58656	2.88113	3.04884
PC 20:1;0-22:4;0	PC	GPL	MEM	42	5	5	0	0.477691	0.595609	0.696432
PC 20:1;0-22:5;0	PC	GPL	MEM	42	6	6	0	0.504545	0.647156	0.97489
PC 20:1;0-22:6;0	PC	GPL	MEM	42	7	7	0	0	0	0
PC 20:2;0-20:2;0	PC	GPL	MEM	40	4	4	0	0.0832332	0.076122	0
PC 20:2;0-20:3;0	PC	GPL	MEM	40	5	5	0	0.510684	0.528221	0.689522
PC 20:2;0-20:4;0	PC	GPL	MEM	40	6	6	0	1.62434	1.44811	1.71952
PC 20:2;0-22:4;0	PC	GPL	MEM	42	6	6	0	0.374317	0.198948	0
PC 20:2;0-22:5;0	PC	GPL	MEM	42	7	7	0	0	2.54255	0.574543
PC 20:3;0-20:3;0	PC	GPL	MEM	40	6	6	0	0.477681	0.199287	0.443381
PC 20:3;0-20:4;0	PC	GPL	MEM	40	7	7	0	1.16592	1.24139	1.56561
PC 20:3;0-22:1;0	PC	GPL	MEM	42	4	4	0	0	0.232228	0.241794
PC 20:3;0-22:3;0	PC	GPL	MEM	42	6	6	0	0.207174	0	0
PC 20:3;0-22:4;0	PC	GPL	MEM	42	7	7	0	0	0	1.47131
PC 20:4;0-20:4;0	PC	GPL	MEM	40	8	8	0	0	0	1.18167
PC 20:4;0-22:0;0	PC	GPL	MEM	42	4	4	0	0	0	0.350538
PC 20:4;0-22:1;0	PC	GPL	MEM	42	5	5	0	0.597427	0.670327	0.444484
PC 20:4;0-22:2;0	PC	GPL	MEM	42	6	6	0	0	0	0
PC 20:4;0-22:3;0	PC	GPL	MEM	42	7	7	0	2.74949	0	1.48436
PC O- 16:0;0-16:0;0	PC O-	GPL	MEM	32	0	0	0	8.52264	9.29062	10.4392
PC O- 16:0;0-16:1;0	PC O-	GPL	MEM	32	1	0	0	5.74072	6.13753	6.70245
PC O- 16:0;0-16:2;0	PC O-	GPL	MEM	32	2	1	0	0.093199	0.0959084	0.112801
PC O- 16:0;0-17:0;0	PC O-	GPL	MEM	33	0	0	0	0.00687318	0.0068954	0.00713662
PC O- 16:0;0-17:1;0	PC O-	GPL	MEM	33	1	0	0	0.0517043	0.0605029	0.0637968
PC O- 16:0;0-18:0;0	PC O-	GPL	MEM	34	0	0	0	0.372418	0	0
PC O- 16:0;0-18:1;0	PC O-	GPL	MEM	34	1	0	0	12.9028	13.4614	14.4938
PC O- 16:0;0-18:2;0	PC O-	GPL	MEM	34	2	1	0	3.021	3.0414	3.34841
PC O- 16:0;0-18:3;0	PC O-	GPL	MEM	34	3	2	0	0.0355625	0.0591336	0.059638
PC O- 16:0;0-19:1;0	PC O-	GPL	MEM	35	1	0	0	0	0	0
PC O- 16:0;0-19:2;0	PC O-	GPL	MEM	35	2	1	0	0.00213089	0	0
PC O- 16:0;0-20:1;0	PC O-	GPL	MEM	36	1	0	0	0.100899	0.113047	0.120003
PC O- 16:0;0-20:2;0	PC O-	GPL	MEM	36	2	1	0	0.191455	0.179319	0.212723
PC O- 16:0;0-20:3;0	PC O-	GPL	MEM	36	3	2	0	1.42535	1.62971	1.62919
PC O- 16:0;0-20:4;0	PC O-	GPL	MEM	36	4	3	0	12.5752	12.0597	13.2765
PC O- 16:0;0-20:5;0	PC O-	GPL	MEM	36	5	4	0	0.362397	0.281595	0.317081
PC O- 16:0;0-21:1;0	PC O-	GPL	MEM	37	1	0	0	0	0	0
PC O- 16:0;0-22:1;0	PC O-	GPL	MEM	38	1	0	0	0.0770304	0.135041	0
PC O- 16:0;0-22:2;0	PC O-	GPL	MEM	38	2	1	0	0	0	0
PC O- 16:0;0-22:3;0	PC O-	GPL	MEM	38	3	2	0	0.1904	0.262144	0.232348
PC O- 16:0;0-22:4;0	PC O-	GPL	MEM	38	4	3	0	3.88975	4.12976	4.59227
PC O- 16:0;0-22:5;0	PC O-	GPL	MEM	38	5	4	0	3.55108	4.12847	4.37003
PC O- 16:0;0-22:6;0	PC O-	GPL	MEM	38	6	5	0	0.52889	0.628442	1.14526
PC O- 16:0;0-24:4;0	PC O-	GPL	MEM	40	4	3	0	1.75923	1.52798	2.23266
PC O- 16:0;0-24:5;0	PC O-	GPL	MEM	40	5	4	0	0.636571	0.450489	0.66706
PC O- 16:1;0-16:0;0	PC O-	GPL	MEM	32	1	0	0	7.33013	8.02129	8.35751
PC O- 16:1;0-16:1;0	PC O-	GPL	MEM	32	2	1	0	2.10275	2.29622	2.75229
PC O- 16:1;0-16:2;0	PC O-	GPL	MEM	32	3	2	0	0	0	0
PC O- 16:1;0-17:0;0	PC O-	GPL	MEM	33	1	0	0	0.0134534	0.0133307	0.0140141
PC O- 16:1;0-17:1;0	PC O-	GPL	MEM	33	2	1	0	0.250958	0.244967	0.24287
PC O- 16:1;0-18:0;0	PC O-	GPL	MEM	34	1	0	0	0.374962	0.361339	0.402168
PC O- 16:1;0-18:1;0	PC O-	GPL	MEM	34	2	1	0	9.01266	9.13259	10.2142
PC O- 16:1;0-18:2;0	PC O-	GPL	MEM	34	3	2	0	0.821125	0.87027	0.828991
PC O- 16:1;0-19:1;0	PC O-	GPL	MEM	35	2	1	0	0	0	0
PC O- 16:1;0-20:0;0	PC O-	GPL	MEM	36	1	0	0	0	0	0
PC O- 16:1;0-20:1;0	PC O-	GPL	MEM	36	2	1	0	0.151809	0.127243	0.143227
PC O- 16:1;0-20:2;0	PC O-	GPL	MEM	36	3	2	0	0.0813836	0.0660711	0.153409
PC O- 16:1;0-20:3;0	PC O-	GPL	MEM	36	4	3	0	2.24867	2.14435	2.71686
PC O- 16:1;0-20:4;0	PC O-	GPL	MEM	36	5	4	0	6.52126	6.67907	7.42629
PC O- 16:1;0-20:5;0	PC O-	GPL	MEM	36	6	5	0	0	0	0
PC O- 16:1;0-22:1;0	PC O-	GPL	MEM	38	2	1	0	0	0	0
PC O- 16:1;0-22:2;0	PC O-	GPL	MEM	38	3	2	0	0	0	0
PC O- 16:1;0-22:3;0	PC O-	GPL	MEM	38	4	3	0	0.166528	0	0.158222
PC O- 16:1;0-22:4;0	PC O-	GPL	MEM	38	5	4	0	3.32268	3.08686	3.14692
PC O- 16:1;0-22:5;0	PC O-	GPL	MEM	38	6	5	0	2.53126	2.91742	2.7723
PC O- 16:1;0-22:6;0	PC O-	GPL	MEM	38	7	6	0	0	0	1.37027
PC O- 16:1;0-24:3;0	PC O-	GPL	MEM	40	4	3	0	0	0	0.132059
PC O- 16:1;0-24:4;0	PC O-	GPL	MEM	40	5	4	0	0.271939	0.406621	0.37917
PC O- 16:2;0-16:0;0	PC O-	GPL	MEM	32	2	1	0	0.664955	0.721466	0.772805
PC O- 16:2;0-16:1;0	PC O-	GPL	MEM	32	3	2	0	0	0	0
PC O- 16:2;0-17:0;0	PC O-	GPL	MEM	33	2	1	0	0	0	0
PC O- 16:2;0-18:0;0	PC O-	GPL	MEM	34	2	1	0	0.568516	0.474823	0.515676
PC O- 16:2;0-18:1;0	PC O-	GPL	MEM	34	3	2	0	0.971285	1.13155	0.954241
PC O- 16:2;0-20:0;0	PC O-	GPL	MEM	36	2	1	0	0	0	0
PC O- 16:2;0-20:1;0	PC O-	GPL	MEM	36	3	2	0	0	0	0
PC O- 16:2;0-20:2;0	PC O-	GPL	MEM	36	4	3	0	0	0	0
PC O- 16:2;0-20:3;0	PC O-	GPL	MEM	36	5	4	0	0	0.215036	0
PC O- 16:2;0-20:4;0	PC O-	GPL	MEM	36	6	5	0	0	0	0
PC O- 16:2;0-22:4;0	PC O-	GPL	MEM	38	6	5	0	0.375834	0	0.277216
PC O- 17:0;0-15:0;0	PC O-	GPL	MEM	32	0	0	0	2.28739	2.59014	2.79424
PC O- 17:0;0-15:1;0	PC O-	GPL	MEM	32	1	0	0	0.0451959	0.0807102	0.20906
PC O- 17:0;0-16:0;0	PC O-	GPL	MEM	33	0	0	0	0.951277	0.899286	0.953834
PC O- 17:0;0-16:1;0	PC O-	GPL	MEM	33	1	0	0	1.85557	2.11176	2.21633
PC O- 17:0;0-16:2;0	PC O-	GPL	MEM	33	2	1	0	0.243869	0.386736	0.318858
PC O- 17:0;0-17:0;0	PC O-	GPL	MEM	34	0	0	0	1.34651	1.46514	1.51551
PC O- 17:0;0-17:1;0	PC O-	GPL	MEM	34	1	0	0	5.1445	5.54773	6.06839
PC O- 17:0;0-17:2;0	PC O-	GPL	MEM	34	2	1	0	0.0538536	0.0430897	0
PC O- 17:0;0-18:1;0	PC O-	GPL	MEM	35	1	0	0	0	0	0
PC O- 17:0;0-18:2;0	PC O-	GPL	MEM	35	2	1	0	0.976946	1.49879	1.37355
PC O- 17:0;0-18:3;0	PC O-	GPL	MEM	35	3	2	0	0	0	0
PC O- 17:0;0-19:1;0	PC O-	GPL	MEM	36	1	0	0	0.569197	0.579939	0.68366
PC O- 17:0;0-19:2;0	PC O-	GPL	MEM	36	2	1	0	0.127677	0.160018	0.142128
PC O- 17:0;0-19:3;0	PC O-	GPL	MEM	36	3	2	0	0	0.0446474	0
PC O- 17:0;0-20:1;0	PC O-	GPL	MEM	37	1	0	0	0	0	0
PC O- 17:0;0-20:2;0	PC O-	GPL	MEM	37	2	1	0	0	0	0
PC O- 17:0;0-20:4;0	PC O-	GPL	MEM	37	4	3	0	1.24572	1.64689	1.37019
PC O- 17:0;0-20:5;0	PC O-	GPL	MEM	37	5	4	0	0.305854	0.359238	0.469641
PC O- 17:0;0-21:1;0	PC O-	GPL	MEM	38	1	0	0	0.277024	0.184738	0
PC O- 17:0;0-21:3;0	PC O-	GPL	MEM	38	3	2	0	0.138458	0.0806309	0.14771
PC O- 17:0;0-22:5;0	PC O-	GPL	MEM	39	5	4	0	0	0	0
PC O- 17:1;0-15:0;0	PC O-	GPL	MEM	32	1	0	0	0.396848	0.525756	0.539643
PC O- 17:1;0-16:0;0	PC O-	GPL	MEM	33	1	0	0	1.15299	1.37436	1.36443
PC O- 17:1;0-16:1;0	PC O-	GPL	MEM	33	2	1	0	1.29558	1.72721	1.48889
PC O- 17:1;0-17:0;0	PC O-	GPL	MEM	34	1	0	0	0.300812	0.277907	0.355428
PC O- 17:1;0-17:1;0	PC O-	GPL	MEM	34	2	1	0	0.465688	0.45986	0.65586
PC O- 17:1;0-18:0;0	PC O-	GPL	MEM	35	1	0	0	0	0	0
PC O- 17:1;0-18:1;0	PC O-	GPL	MEM	35	2	1	0	0.564851	0.857186	0.756737
PC O- 17:1;0-18:2;0	PC O-	GPL	MEM	35	3	2	0	0	0	0
PC O- 17:1;0-18:3;0	PC O-	GPL	MEM	35	4	3	0	0	0	0
PC O- 17:1;0-19:0;0	PC O-	GPL	MEM	36	1	0	0	0.0108963	0	0
PC O- 17:1;0-19:1;0	PC O-	GPL	MEM	36	2	1	0	0.0822075	0.123708	0.106489
PC O- 17:1;0-19:2;0	PC O-	GPL	MEM	36	3	2	0	0	0	0
PC O- 17:1;0-20:0;0	PC O-	GPL	MEM	37	1	0	0	0	0	0
PC O- 17:1;0-20:1;0	PC O-	GPL	MEM	37	2	1	0	0	0	0
PC O- 17:1;0-20:3;0	PC O-	GPL	MEM	37	4	3	0	0.0597122	0.080771	0.0698439
PC O- 17:1;0-20:4;0	PC O-	GPL	MEM	37	5	4	0	1.22455	1.35229	1.48231
PC O- 17:1;0-22:4;0	PC O-	GPL	MEM	39	5	4	0	0	0	0
PC O- 17:2;0-16:0;0	PC O-	GPL	MEM	33	2	1	0	0.497949	0.535331	0.420259
PC O- 17:2;0-17:0;0	PC O-	GPL	MEM	34	2	1	0	0.062109	0.0380454	0.0513943
PC O- 17:2;0-17:1;0	PC O-	GPL	MEM	34	3	2	0	0	0	0
PC O- 17:2;0-18:0;0	PC O-	GPL	MEM	35	2	1	0	0.0166034	0.017948	0.0201069
PC O- 17:2;0-18:1;0	PC O-	GPL	MEM	35	3	2	0	0	0	0
PC O- 17:2;0-20:2;0	PC O-	GPL	MEM	37	4	3	0	0	0	0
PC O- 17:2;0-20:3;0	PC O-	GPL	MEM	37	5	4	0	0	0	0
PC O- 18:0;0-14:0;0	PC O-	GPL	MEM	32	0	0	0	1.75773	1.61826	1.59452
PC O- 18:0;0-14:1;0	PC O-	GPL	MEM	32	1	0	0	0	0	0
PC O- 18:0;0-15:0;0	PC O-	GPL	MEM	33	0	0	0	0.00557485	0.00697781	0.0055051
PC O- 18:0;0-15:1;0	PC O-	GPL	MEM	33	1	0	0	0	0	0
PC O- 18:0;0-16:0;0	PC O-	GPL	MEM	34	0	0	0	4.98306	5.42035	5.89826
PC O- 18:0;0-16:1;0	PC O-	GPL	MEM	34	1	0	0	1.18437	1.24583	1.39583
PC O- 18:0;0-16:2;0	PC O-	GPL	MEM	34	2	1	0	0	0	0
PC O- 18:0;0-17:1;0	PC O-	GPL	MEM	35	1	0	0	0	0	0
PC O- 18:0;0-17:2;0	PC O-	GPL	MEM	35	2	1	0	0	0	0
PC O- 18:0;0-18:1;0	PC O-	GPL	MEM	36	1	0	0	4.1671	4.17028	4.87956
PC O- 18:0;0-18:2;0	PC O-	GPL	MEM	36	2	1	0	1.40079	1.39956	1.49706
PC O- 18:0;0-18:3;0	PC O-	GPL	MEM	36	3	2	0	0.0496808	0	0.0435784
PC O- 18:0;0-19:1;0	PC O-	GPL	MEM	37	1	0	0	0	0	0
PC O- 18:0;0-20:1;0	PC O-	GPL	MEM	38	1	0	0	0.480706	0.588916	0
PC O- 18:0;0-20:2;0	PC O-	GPL	MEM	38	2	1	0	0	0	0
PC O- 18:0;0-20:3;0	PC O-	GPL	MEM	38	3	2	0	0.861154	1.21088	0.95269
PC O- 18:0;0-20:4;0	PC O-	GPL	MEM	38	4	3	0	6.48049	6.72262	7.28753
PC O- 18:0;0-20:5;0	PC O-	GPL	MEM	38	5	4	0	0.327369	0	0.270805
PC O- 18:0;0-20:6;0	PC O-	GPL	MEM	38	6	5	0	0.258816	0.557227	1.16057
PC O- 18:0;0-22:4;0	PC O-	GPL	MEM	40	4	3	0	2.19641	1.94493	2.25962
PC O- 18:0;0-22:5;0	PC O-	GPL	MEM	40	5	4	0	1.7202	2.06483	1.93477
PC O- 18:0;0-22:6;0	PC O-	GPL	MEM	40	6	5	0	0.517945	0.480766	0.37108
PC O- 18:0;0-24:4;0	PC O-	GPL	MEM	42	4	3	0	0	1.18524	1.27308
PC O- 18:0;0-24:5;0	PC O-	GPL	MEM	42	5	4	0	0.514534	0.258206	0.3846
PC O- 18:1;0-14:0;0	PC O-	GPL	MEM	32	1	0	0	0.992357	0.861549	1.08219
PC O- 18:1;0-15:0;0	PC O-	GPL	MEM	33	1	0	0	0.0195012	0.0205751	0.0207636
PC O- 18:1;0-16:0;0	PC O-	GPL	MEM	34	1	0	0	9.82524	9.98359	11.3439
PC O- 18:1;0-16:1;0	PC O-	GPL	MEM	34	2	1	0	1.5282	1.54364	1.6994
PC O- 18:1;0-16:2;0	PC O-	GPL	MEM	34	3	2	0	0	0	0
PC O- 18:1;0-17:0;0	PC O-	GPL	MEM	35	1	0	0	0	0	0
PC O- 18:1;0-17:1;0	PC O-	GPL	MEM	35	2	1	0	0.0164751	0.0237537	0.0231786
PC O- 18:1;0-18:0;0	PC O-	GPL	MEM	36	1	0	0	0.459336	0.425499	0.507777
PC O- 18:1;0-18:1;0	PC O-	GPL	MEM	36	2	1	0	6.58255	6.51429	7.59847
PC O- 18:1;0-18:2;0	PC O-	GPL	MEM	36	3	2	0	1.58438	1.79368	1.80321
PC O- 18:1;0-18:3;0	PC O-	GPL	MEM	36	4	3	0	0	0.195099	0.238079
PC O- 18:1;0-19:1;0	PC O-	GPL	MEM	37	2	1	0	0	0	0
PC O- 18:1;0-20:0;0	PC O-	GPL	MEM	38	1	0	0	0.0806705	0	0
PC O- 18:1;0-20:1;0	PC O-	GPL	MEM	38	2	1	0	0	0	0
PC O- 18:1;0-20:2;0	PC O-	GPL	MEM	38	3	2	0	0.227438	0.217267	0.192878
PC O- 18:1;0-20:3;0	PC O-	GPL	MEM	38	4	3	0	2.201	2.86394	3.07531
PC O- 18:1;0-20:4;0	PC O-	GPL	MEM	38	5	4	0	9.47296	10.1496	10.2108
PC O- 18:1;0-20:5;0	PC O-	GPL	MEM	38	6	5	0	0	0	0
PC O- 18:1;0-22:3;0	PC O-	GPL	MEM	40	4	3	0	0.397547	0.31953	0.30201
PC O- 18:1;0-22:4;0	PC O-	GPL	MEM	40	5	4	0	3.05601	2.95343	2.99488
PC O- 18:1;0-22:5;0	PC O-	GPL	MEM	40	6	5	0	3.30847	3.41469	3.45233
PC O- 18:1;0-22:6;0	PC O-	GPL	MEM	40	7	6	0	0.95679	0.917161	1.65114
PC O- 18:1;0-24:3;0	PC O-	GPL	MEM	42	4	3	0	0	0	0
PC O- 18:1;0-24:4;0	PC O-	GPL	MEM	42	5	4	0	0.898997	1.02225	1.77729
PC O- 18:1;0-24:5;0	PC O-	GPL	MEM	42	6	5	0	0	0	0
PC O- 18:2;0-14:0;0	PC O-	GPL	MEM	32	2	1	0	0.517394	0.549488	0.443184
PC O- 18:2;0-15:0;0	PC O-	GPL	MEM	33	2	1	0	0	0	0
PC O- 18:2;0-16:0;0	PC O-	GPL	MEM	34	2	1	0	2.22847	1.86333	2.20661
PC O- 18:2;0-16:1;0	PC O-	GPL	MEM	34	3	2	0	0.17386	0.19513	0.20081
PC O- 18:2;0-17:0;0	PC O-	GPL	MEM	35	2	1	0	0.00335878	0.00944397	0.00228641
PC O- 18:2;0-17:1;0	PC O-	GPL	MEM	35	3	2	0	0	0	0
PC O- 18:2;0-18:0;0	PC O-	GPL	MEM	36	2	1	0	0.392146	0.460599	0.631025
PC O- 18:2;0-18:1;0	PC O-	GPL	MEM	36	3	2	0	2.62822	3.02393	3.25802
PC O- 18:2;0-18:2;0	PC O-	GPL	MEM	36	4	3	0	0.940353	1.12043	1.54617
PC O- 18:2;0-20:0;0	PC O-	GPL	MEM	38	2	1	0	0	0	0
PC O- 18:2;0-20:1;0	PC O-	GPL	MEM	38	3	2	0	0.0438137	0.0337078	0.0410833
PC O- 18:2;0-20:2;0	PC O-	GPL	MEM	38	4	3	0	0	0	0.133065
PC O- 18:2;0-20:3;0	PC O-	GPL	MEM	38	5	4	0	0.918785	0.857879	1.10903
PC O- 18:2;0-20:4;0	PC O-	GPL	MEM	38	6	5	0	4.16068	4.02437	3.71663
PC O- 18:2;0-22:3;0	PC O-	GPL	MEM	40	5	4	0	0	0	0
PC O- 18:2;0-22:4;0	PC O-	GPL	MEM	40	6	5	0	1.66168	1.77153	2.03214
PC O- 18:2;0-22:5;0	PC O-	GPL	MEM	40	7	6	0	2.08263	2.05696	1.99238
PC O- 18:2;0-24:4;0	PC O-	GPL	MEM	42	6	5	0	0.90576	0	0
PE 14:0;0-16:1;0	PE	GPL	MEM	30	1	1	0	0	0	0
PE 14:0;0-18:0;0	PE	GPL	MEM	32	0	0	0	0	0	0
PE 14:0;0-18:1;0	PE	GPL	MEM	32	1	1	0	0.50283	0.696889	0.802866
PE 14:0;0-20:1;0	PE	GPL	MEM	34	1	1	0	0	0	0
PE 14:0;0-22:4;0	PE	GPL	MEM	36	4	4	0	0	0	0
PE 15:0;0-17:0;0	PE	GPL	MEM	32	0	0	0	0	0	0
PE 15:0;0-17:1;0	PE	GPL	MEM	32	1	1	0	0	0	0
PE 15:0;0-18:2;0	PE	GPL	MEM	33	2	2	0	0	0	0
PE 15:0;0-19:1;0	PE	GPL	MEM	34	1	1	0	0	0	0
PE 15:0;0-20:1;0	PE	GPL	MEM	35	1	1	0	0	0	0
PE 15:0;0-20:3;0	PE	GPL	MEM	35	3	3	0	0	0	0
PE 15:0;0-22:2;0	PE	GPL	MEM	37	2	2	0	0	0	0
PE 15:0;0-22:3;0	PE	GPL	MEM	37	3	3	0	0	0.174236	0.071787
PE 15:0;0-22:4;0	PE	GPL	MEM	37	4	4	0	0	0	0.916232
PE 15:0;0-22:5;0	PE	GPL	MEM	37	5	5	0	0	0	0
PE 15:0;0-24:4;0	PE	GPL	MEM	39	4	4	0	0.0950395	0	0.142726
PE 15:0;0-24:5;0	PE	GPL	MEM	39	5	5	0	0	0	0
PE 15:1;0-19:1;0	PE	GPL	MEM	34	2	2	0	0	0	0
PE 15:1;0-24:5;0	PE	GPL	MEM	39	6	6	0	0.0205858	0.0429911	0.0451497
PE 16:0;0-16:0;0	PE	GPL	MEM	32	0	0	0	0	0	0
PE 16:0;0-16:1;0	PE	GPL	MEM	32	1	1	0	1.04167	1.25537	1.28729
PE 16:0;0-18:0;0	PE	GPL	MEM	34	0	0	0	0	3.95418	0
PE 16:0;0-18:1;0	PE	GPL	MEM	34	1	1	0	34.7806	37.428	37.7354
PE 16:0;0-18:2;0	PE	GPL	MEM	34	2	2	0	2.91652	2.9574	2.98307
PE 16:0;0-19:1;0	PE	GPL	MEM	35	1	1	0	3.45744	3.96142	3.53456
PE 16:0;0-19:2;0	PE	GPL	MEM	35	2	2	0	0	0	0
PE 16:0;0-20:1;0	PE	GPL	MEM	36	1	1	0	0.896467	0.882513	0.92635
PE 16:0;0-20:2;0	PE	GPL	MEM	36	2	2	0	0.503256	0.635402	0.517444
PE 16:0;0-20:3;0	PE	GPL	MEM	36	3	3	0	2.09214	2.26127	2.13476
PE 16:0;0-20:4;0	PE	GPL	MEM	36	4	4	0	7.30055	8.40267	8.31915
PE 16:0;0-20:5;0	PE	GPL	MEM	36	5	5	0	0	0	0
PE 16:0;0-21:1;0	PE	GPL	MEM	37	1	1	0	0	0	0
PE 16:0;0-22:1;0	PE	GPL	MEM	38	1	1	0	0.269176	0	0
PE 16:0;0-22:2;0	PE	GPL	MEM	38	2	2	0	0	0	0
PE 16:0;0-22:3;0	PE	GPL	MEM	38	3	3	0	1.32695	0	1.84668
PE 16:0;0-22:4;0	PE	GPL	MEM	38	4	4	0	8.77612	9.59957	9.56897
PE 16:0;0-22:5;0	PE	GPL	MEM	38	5	5	0	15.2589	17.7598	16.6394
PE 16:0;0-22:6;0	PE	GPL	MEM	38	6	6	0	2.36095	0	2.94784
PE 16:0;0-24:4;0	PE	GPL	MEM	40	4	4	0	6.37366	0	0
PE 16:1;0-16:1;0	PE	GPL	MEM	32	2	2	0	0	0	0
PE 16:1;0-17:1;0	PE	GPL	MEM	33	2	2	0	3.51513	5.18863	4.47469
PE 16:1;0-18:0;0	PE	GPL	MEM	34	1	1	0	8.21678	8.74394	8.88725
PE 16:1;0-18:1;0	PE	GPL	MEM	34	2	2	0	5.23251	5.82507	5.2228
PE 16:1;0-18:2;0	PE	GPL	MEM	34	3	3	0	0	0	0
PE 16:1;0-19:1;0	PE	GPL	MEM	35	2	2	0	0	0	0
PE 16:1;0-19:2;0	PE	GPL	MEM	35	3	3	0	0	0	0
PE 16:1;0-20:0;0	PE	GPL	MEM	36	1	1	0	0	0	0
PE 16:1;0-20:1;0	PE	GPL	MEM	36	2	2	0	0.40936	0.453377	0.481154
PE 16:1;0-20:2;0	PE	GPL	MEM	36	3	3	0	0	0.156975	0.148123
PE 16:1;0-20:3;0	PE	GPL	MEM	36	4	4	0	0.81134	0.788563	0.929767
PE 16:1;0-20:4;0	PE	GPL	MEM	36	5	5	0	0.928907	1.10634	1.16062
PE 16:1;0-21:1;0	PE	GPL	MEM	37	2	2	0	0	0	0
PE 16:1;0-21:2;0	PE	GPL	MEM	37	3	3	0	0	0	0
PE 16:1;0-22:1;0	PE	GPL	MEM	38	2	2	0	0	0	0
PE 16:1;0-22:2;0	PE	GPL	MEM	38	3	3	0	0	0	0
PE 16:1;0-22:3;0	PE	GPL	MEM	38	4	4	0	1.18756	0	1.10437
PE 16:1;0-22:4;0	PE	GPL	MEM	38	5	5	0	1.8886	2.07742	2.07001
PE 16:1;0-22:5;0	PE	GPL	MEM	38	6	6	0	2.50434	4.31035	2.84661
PE 16:1;0-24:0;0	PE	GPL	MEM	40	1	1	0	0	0	0
PE 16:1;0-24:4;0	PE	GPL	MEM	40	5	5	0	3.76458	4.28796	4.033
PE 16:2;0-18:0;0	PE	GPL	MEM	34	2	2	0	0.15782	0	0
PE 16:2;0-18:1;0	PE	GPL	MEM	34	3	3	0	0	0	0
PE 17:0;0-17:1;0	PE	GPL	MEM	34	1	1	0	0.182751	0.243247	0.291033
PE 17:0;0-18:0;0	PE	GPL	MEM	35	0	0	0	0	0	0
PE 17:0;0-18:1;0	PE	GPL	MEM	35	1	1	0	4.68464	5.0711	4.72012
PE 17:0;0-18:2;0	PE	GPL	MEM	35	2	2	0	0.420525	0.455709	0.404572
PE 17:0;0-19:0;0	PE	GPL	MEM	36	0	0	0	0	0	0
PE 17:0;0-19:1;0	PE	GPL	MEM	36	1	1	0	0	0	0
PE 17:0;0-20:1;0	PE	GPL	MEM	37	1	1	0	0.0159808	0	0.0152786
PE 17:0;0-20:2;0	PE	GPL	MEM	37	2	2	0	0	0.0664371	0
PE 17:0;0-20:3;0	PE	GPL	MEM	37	3	3	0	0.738994	0.800808	0.499454
PE 17:0;0-20:4;0	PE	GPL	MEM	37	4	4	0	2.74703	3.23851	2.03699
PE 17:0;0-20:5;0	PE	GPL	MEM	37	5	5	0	0	0	0
PE 17:0;0-21:1;0	PE	GPL	MEM	38	1	1	0	0	0	0
PE 17:0;0-22:2;0	PE	GPL	MEM	39	2	2	0	0	0	0
PE 17:0;0-22:3;0	PE	GPL	MEM	39	3	3	0	0.16699	0	0
PE 17:0;0-22:4;0	PE	GPL	MEM	39	4	4	0	0.58663	0.917381	0.754983
PE 17:0;0-22:5;0	PE	GPL	MEM	39	5	5	0	0.116912	0.119534	1.04501
PE 17:0;0-22:6;0	PE	GPL	MEM	39	6	6	0	0.11479	0.182852	0.141669
PE 17:1;0-17:1;0	PE	GPL	MEM	34	2	2	0	0	0	0.339781
PE 17:1;0-18:0;0	PE	GPL	MEM	35	1	1	0	2.09631	2.36059	2.22077
PE 17:1;0-18:1;0	PE	GPL	MEM	35	2	2	0	5.41255	6.79478	6.21871
PE 17:1;0-18:2;0	PE	GPL	MEM	35	3	3	0	0	0	0
PE 17:1;0-19:1;0	PE	GPL	MEM	36	2	2	0	0.285768	0.314422	0.317412
PE 17:1;0-19:2;0	PE	GPL	MEM	36	3	3	0	0	0	0
PE 17:1;0-19:3;0	PE	GPL	MEM	36	4	4	0	0	0	0
PE 17:1;0-20:0;0	PE	GPL	MEM	37	1	1	0	0.0209695	0.0229487	0.0224486
PE 17:1;0-20:1;0	PE	GPL	MEM	37	2	2	0	0.347498	0.355458	0.400094
PE 17:1;0-20:2;0	PE	GPL	MEM	37	3	3	0	0	0	0
PE 17:1;0-20:3;0	PE	GPL	MEM	37	4	4	0	0	0	0
PE 17:1;0-21:1;0	PE	GPL	MEM	38	2	2	0	0	0	0
PE 17:1;0-21:2;0	PE	GPL	MEM	38	3	3	0	0	0	0
PE 17:1;0-21:3;0	PE	GPL	MEM	38	4	4	0	0	0	0
PE 17:1;0-22:1;0	PE	GPL	MEM	39	2	2	0	0	0	0
PE 17:1;0-22:2;0	PE	GPL	MEM	39	3	3	0	0	0.165103	0
PE 17:1;0-22:3;0	PE	GPL	MEM	39	4	4	0	0.565157	0.85804	0.751139
PE 17:1;0-22:4;0	PE	GPL	MEM	39	5	5	0	1.29008	1.30264	0
PE 17:1;0-22:5;0	PE	GPL	MEM	39	6	6	0	0.480357	0.860592	0.723592
PE 17:1;0-22:6;0	PE	GPL	MEM	39	7	7	0	0.841106	0.87454	0
PE 17:1;0-23:1;0	PE	GPL	MEM	40	2	2	0	0	0	0
PE 17:1;0-24:6;0	PE	GPL	MEM	41	7	7	0	0	0	0
PE 17:2;0-24:5;0	PE	GPL	MEM	41	7	7	0	0	1.07199	0
PE 18:0;0-18:0;0	PE	GPL	MEM	36	0	0	0	0	0	0
PE 18:0;0-18:1;0	PE	GPL	MEM	36	1	1	0	139.692	157.184	151.742
PE 18:0;0-18:2;0	PE	GPL	MEM	36	2	2	0	28.9175	32.5234	32.7414
PE 18:0;0-18:3;0	PE	GPL	MEM	36	3	3	0	0.9242	0.920262	0.932343
PE 18:0;0-19:1;0	PE	GPL	MEM	37	1	1	0	0.87631	1.35537	1.05623
PE 18:0;0-19:2;0	PE	GPL	MEM	37	2	2	0	0.0896627	0.0867255	0
PE 18:0;0-20:1;0	PE	GPL	MEM	38	1	1	0	0	0.831764	0.852776
PE 18:0;0-20:2;0	PE	GPL	MEM	38	2	2	0	1.22138	1.36535	1.27454
PE 18:0;0-20:3;0	PE	GPL	MEM	38	3	3	0	12.2719	15.8172	14.3207
PE 18:0;0-20:4;0	PE	GPL	MEM	38	4	4	0	98.677	112.255	106.36
PE 18:0;0-20:5;0	PE	GPL	MEM	38	5	5	0	1.0843	1.32213	1.28704
PE 18:0;0-21:2;0	PE	GPL	MEM	39	2	2	0	0	0	0
PE 18:0;0-21:3;0	PE	GPL	MEM	39	3	3	0	0.471885	0.486312	0
PE 18:0;0-22:1;0	PE	GPL	MEM	40	1	1	0	0.203634	0.189496	0.203878
PE 18:0;0-22:2;0	PE	GPL	MEM	40	2	2	0	0.367877	0.380832	0.390892
PE 18:0;0-22:3;0	PE	GPL	MEM	40	3	3	0	0.617301	0.621043	0.690857
PE 18:0;0-22:4;0	PE	GPL	MEM	40	4	4	0	15.3076	21.678	22.2562
PE 18:0;0-22:5;0	PE	GPL	MEM	40	5	5	0	21.8503	24.2355	24.015
PE 18:0;0-22:6;0	PE	GPL	MEM	40	6	6	0	12.6925	13.7001	14.0737
PE 18:0;0-24:2;0	PE	GPL	MEM	42	2	2	0	0	0.437996	0
PE 18:0;0-24:4;0	PE	GPL	MEM	42	4	4	0	0	1.84439	0
PE 18:1;0-18:1;0	PE	GPL	MEM	36	2	2	0	51.5329	58.4416	56.9458
PE 18:1;0-18:2;0	PE	GPL	MEM	36	3	3	0	9.8237	11.6783	11.0357
PE 18:1;0-18:3;0	PE	GPL	MEM	36	4	4	0	0.946408	0.970078	0.821711
PE 18:1;0-19:0;0	PE	GPL	MEM	37	1	1	0	0.186851	0.276069	0.267981
PE 18:1;0-19:1;0	PE	GPL	MEM	37	2	2	0	1.51017	1.56818	1.6687
PE 18:1;0-19:2;0	PE	GPL	MEM	37	3	3	0	0	0	0.289814
PE 18:1;0-20:0;0	PE	GPL	MEM	38	1	1	0	1.75998	1.38543	1.43465
PE 18:1;0-20:1;0	PE	GPL	MEM	38	2	2	0	2.98977	3.39745	3.21276
PE 18:1;0-20:2;0	PE	GPL	MEM	38	3	3	0	1.68356	2.17355	2.0032
PE 18:1;0-20:3;0	PE	GPL	MEM	38	4	4	0	8.63135	9.76047	8.84519
PE 18:1;0-20:4;0	PE	GPL	MEM	38	5	5	0	8.20013	9.8166	9.19096
PE 18:1;0-20:5;0	PE	GPL	MEM	38	6	6	0	0	0.930008	0
PE 18:1;0-21:1;0	PE	GPL	MEM	39	2	2	0	0	0	0
PE 18:1;0-21:3;0	PE	GPL	MEM	39	4	4	0	0.30757	0	0
PE 18:1;0-22:0;0	PE	GPL	MEM	40	1	1	0	1.02084	1.16769	0.938726
PE 18:1;0-22:1;0	PE	GPL	MEM	40	2	2	0	1.05993	1.18306	1.19692
PE 18:1;0-22:2;0	PE	GPL	MEM	40	3	3	0	0.623899	0.710171	0.659372
PE 18:1;0-22:3;0	PE	GPL	MEM	40	4	4	0	4.97242	7.63127	6.68362
PE 18:1;0-22:4;0	PE	GPL	MEM	40	5	5	0	7.50466	7.96074	8.12829
PE 18:1;0-22:5;0	PE	GPL	MEM	40	6	6	0	17.5212	19.7795	19.0015
PE 18:1;0-22:6;0	PE	GPL	MEM	40	7	7	0	0	6.31237	6.48056
PE 18:1;0-24:0;0	PE	GPL	MEM	42	1	1	0	1.56172	1.72503	1.69074
PE 18:1;0-24:1;0	PE	GPL	MEM	42	2	2	0	1.04242	0.865253	0.922553
PE 18:1;0-24:3;0	PE	GPL	MEM	42	4	4	0	0	2.2383	0
PE 18:2;0-18:2;0	PE	GPL	MEM	36	4	4	0	1.1614	1.13865	1.24195
PE 18:2;0-19:0;0	PE	GPL	MEM	37	2	2	0	0.166218	0.180883	0.171047
PE 18:2;0-19:1;0	PE	GPL	MEM	37	3	3	0	0	0.348883	0
PE 18:2;0-20:0;0	PE	GPL	MEM	38	2	2	0	0.23321	0	0
PE 18:2;0-20:1;0	PE	GPL	MEM	38	3	3	0	0.558416	0.689939	0.617618
PE 18:2;0-20:2;0	PE	GPL	MEM	38	4	4	0	0.349577	0.549442	0.553529
PE 18:2;0-20:3;0	PE	GPL	MEM	38	5	5	0	0.277299	0.320179	0.257162
PE 18:2;0-20:4;0	PE	GPL	MEM	38	6	6	0	0.584313	1.38395	0.631264
PE 18:2;0-22:0;0	PE	GPL	MEM	40	2	2	0	0	0	0
PE 18:2;0-22:1;0	PE	GPL	MEM	40	3	3	0	0	0.0663213	0.0704539
PE 18:2;0-22:4;0	PE	GPL	MEM	40	6	6	0	0.799811	0.891968	0.84381
PE 18:2;0-22:5;0	PE	GPL	MEM	40	7	7	0	5.75311	0.684728	0.772465
PE 18:2;0-24:0;0	PE	GPL	MEM	42	2	2	0	0	0	0
PE 19:0;0-19:1;0	PE	GPL	MEM	38	1	1	0	0	0	0
PE 19:0;0-20:3;0	PE	GPL	MEM	39	3	3	0	0	0.0835164	0
PE 19:0;0-20:4;0	PE	GPL	MEM	39	4	4	0	0.205973	0.280286	0.272297
PE 19:1;0-19:1;0	PE	GPL	MEM	38	2	2	0	0	0	0
PE 19:1;0-20:1;0	PE	GPL	MEM	39	2	2	0	0	0	0
PE 19:1;0-20:3;0	PE	GPL	MEM	39	4	4	0	0	0	0.137445
PE 19:1;0-20:4;0	PE	GPL	MEM	39	5	5	0	0.0974408	0.0806695	0.718158
PE 20:0;0-20:3;0	PE	GPL	MEM	40	3	3	0	0	0	0
PE 20:0;0-20:4;0	PE	GPL	MEM	40	4	4	0	0.399203	0.742067	0.689571
PE 20:0;0-22:4;0	PE	GPL	MEM	42	4	4	0	0	0.0900057	0
PE 20:1;0-20:1;0	PE	GPL	MEM	40	2	2	0	0.0239722	0	0
PE 20:1;0-20:2;0	PE	GPL	MEM	40	3	3	0	0	0	0
PE 20:1;0-20:3;0	PE	GPL	MEM	40	4	4	0	0	0.346655	0.314902
PE 20:1;0-20:4;0	PE	GPL	MEM	40	5	5	0	1.34709	1.49536	1.58081
PE 20:2;0-20:2;0	PE	GPL	MEM	40	4	4	0	0	0	0
PE 20:2;0-20:3;0	PE	GPL	MEM	40	5	5	0	0	0	0
PE 20:2;0-20:4;0	PE	GPL	MEM	40	6	6	0	0.268063	0.489858	0.436213
PE 20:3;0-20:3;0	PE	GPL	MEM	40	6	6	0	0	0.0820553	0
PE 20:3;0-20:4;0	PE	GPL	MEM	40	7	7	0	0.919577	0.153507	0.0954049
PE 20:3;0-22:1;0	PE	GPL	MEM	42	4	4	0	0	0	0
PE 20:4;0-20:4;0	PE	GPL	MEM	40	8	8	0	0.798858	0.767536	0.651354
PE 20:4;0-22:0;0	PE	GPL	MEM	42	4	4	0	0	0	0
PE 20:4;0-22:4;0	PE	GPL	MEM	42	8	8	0	1.39353	1.34799	1.37135
PE 20:4;0-24:0;0	PE	GPL	MEM	44	4	4	0	0	0	0.715492
PE 22:0;0-22:4;0	PE	GPL	MEM	44	4	4	0	0	0	0.0855438
PE 22:3;0-22:5;0	PE	GPL	MEM	44	8	8	0	0	0	0
PE 22:4;0-22:4;0	PE	GPL	MEM	44	8	8	0	0	0	3.33477
PE O- 16:0;0-16:1;0	PE O-	GPL	MEM	32	1	0	0	0	0	0
PE O- 16:0;0-17:1;0	PE O-	GPL	MEM	33	1	0	0	0	0	0
PE O- 16:0;0-18:0;0	PE O-	GPL	MEM	34	0	0	0	0	0	0
PE O- 16:0;0-18:1;0	PE O-	GPL	MEM	34	1	0	0	0.493923	0.453327	0.467124
PE O- 16:0;0-18:2;0	PE O-	GPL	MEM	34	2	1	0	0.295165	0.26395	0.203318
PE O- 16:0;0-19:1;0	PE O-	GPL	MEM	35	1	0	0	0	0	0
PE O- 16:0;0-20:1;0	PE O-	GPL	MEM	36	1	0	0	0	0	0
PE O- 16:0;0-20:2;0	PE O-	GPL	MEM	36	2	1	0	0.0411645	0	0
PE O- 16:0;0-20:3;0	PE O-	GPL	MEM	36	3	2	0	0.142117	0.168224	0.232154
PE O- 16:0;0-20:4;0	PE O-	GPL	MEM	36	4	3	0	0.797693	0.79309	0.7703
PE O- 16:0;0-20:5;0	PE O-	GPL	MEM	36	5	4	0	0.4071	0.485554	0.363812
PE O- 16:0;0-21:1;0	PE O-	GPL	MEM	37	1	0	0	0	0	0
PE O- 16:0;0-22:1;0	PE O-	GPL	MEM	38	1	0	0	0	0	0
PE O- 16:0;0-22:2;0	PE O-	GPL	MEM	38	2	1	0	0	0	0
PE O- 16:0;0-22:3;0	PE O-	GPL	MEM	38	3	2	0	0	0.11525	0.0588837
PE O- 16:0;0-22:4;0	PE O-	GPL	MEM	38	4	3	0	1.11062	1.24563	1.03512
PE O- 16:0;0-22:5;0	PE O-	GPL	MEM	38	5	4	0	2.23699	2.37876	2.3997
PE O- 16:0;0-22:6;0	PE O-	GPL	MEM	38	6	5	0	0.559257	0.526966	0.973192
PE O- 16:0;0-24:4;0	PE O-	GPL	MEM	40	4	3	0	0.0450998	0	0.0484225
PE O- 16:0;0-24:5;0	PE O-	GPL	MEM	40	5	4	0	0	0	0
PE O- 16:1;0-16:0;0	PE O-	GPL	MEM	32	1	0	0	0	0	0
PE O- 16:1;0-16:1;0	PE O-	GPL	MEM	32	2	1	0	1.4356	1.6951	1.52666
PE O- 16:1;0-17:0;0	PE O-	GPL	MEM	33	1	0	0	0	0	0
PE O- 16:1;0-17:1;0	PE O-	GPL	MEM	33	2	1	0	0.682544	0.933673	0.90444
PE O- 16:1;0-18:0;0	PE O-	GPL	MEM	34	1	0	0	0	0	0
PE O- 16:1;0-18:1;0	PE O-	GPL	MEM	34	2	1	0	33.0277	37.0423	35.7285
PE O- 16:1;0-18:2;0	PE O-	GPL	MEM	34	3	2	0	2.98546	3.0559	2.83686
PE O- 16:1;0-18:3;0	PE O-	GPL	MEM	34	4	3	0	0	0	0
PE O- 16:1;0-19:1;0	PE O-	GPL	MEM	35	2	1	0	0.0556392	0.0537337	0.0844029
PE O- 16:1;0-19:2;0	PE O-	GPL	MEM	35	3	2	0	0	0	0
PE O- 16:1;0-20:0;0	PE O-	GPL	MEM	36	1	0	0	0	0	0
PE O- 16:1;0-20:1;0	PE O-	GPL	MEM	36	2	1	0	0.819317	0.796564	0.763576
PE O- 16:1;0-20:2;0	PE O-	GPL	MEM	36	3	2	0	0.344611	0.477603	0.353575
PE O- 16:1;0-20:3;0	PE O-	GPL	MEM	36	4	3	0	3.09604	3.41721	3.32757
PE O- 16:1;0-20:4;0	PE O-	GPL	MEM	36	5	4	0	68.657	77.1157	71.8459
PE O- 16:1;0-20:5;0	PE O-	GPL	MEM	36	6	5	0	1.97042	2.37012	2.97915
PE O- 16:1;0-21:1;0	PE O-	GPL	MEM	37	2	1	0	0	0	0
PE O- 16:1;0-21:2;0	PE O-	GPL	MEM	37	3	2	0	0	0	0
PE O- 16:1;0-21:3;0	PE O-	GPL	MEM	37	4	3	0	0	0.0424103	0.0395416
PE O- 16:1;0-22:1;0	PE O-	GPL	MEM	38	2	1	0	0.385634	0.303724	0.52155
PE O- 16:1;0-22:2;0	PE O-	GPL	MEM	38	3	2	0	0.247995	0.138501	0.20567
PE O- 16:1;0-22:3;0	PE O-	GPL	MEM	38	4	3	0	1.70062	1.78552	1.83477
PE O- 16:1;0-22:4;0	PE O-	GPL	MEM	38	5	4	0	62.6816	72.947	71.0122
PE O- 16:1;0-22:5;0	PE O-	GPL	MEM	38	6	5	0	48.198	54.2813	52.2452
PE O- 16:1;0-22:6;0	PE O-	GPL	MEM	38	7	6	0	32.843	36.3818	34.5545
PE O- 16:1;0-24:3;0	PE O-	GPL	MEM	40	4	3	0	0.172652	0.157654	0
PE O- 16:1;0-24:4;0	PE O-	GPL	MEM	40	5	4	0	3.99895	3.93287	3.93599
PE O- 16:1;0-24:5;0	PE O-	GPL	MEM	40	6	5	0	1.40433	1.75865	1.66573
PE O- 16:1;0-24:6;0	PE O-	GPL	MEM	40	7	6	0	0	0	0
PE O- 16:2;0-16:0;0	PE O-	GPL	MEM	32	2	1	0	0.210202	0.224024	0.247165
PE O- 16:2;0-18:0;0	PE O-	GPL	MEM	34	2	1	0	0.098405	0.0746429	0.0643662
PE O- 16:2;0-18:1;0	PE O-	GPL	MEM	34	3	2	0	0.559778	0.682094	0.540789
PE O- 16:2;0-20:1;0	PE O-	GPL	MEM	36	3	2	0	0	0	0
PE O- 16:2;0-20:2;0	PE O-	GPL	MEM	36	4	3	0	0	0	0
PE O- 16:2;0-20:3;0	PE O-	GPL	MEM	36	5	4	0	0	0	0
PE O- 16:2;0-20:4;0	PE O-	GPL	MEM	36	6	5	0	1.34648	1.85911	0.80299
PE O- 16:2;0-22:4;0	PE O-	GPL	MEM	38	6	5	0	0.610246	1.04206	0.414043
PE O- 16:2;0-22:5;0	PE O-	GPL	MEM	38	7	6	0	0	0	0
PE O- 17:0;0-16:1;0	PE O-	GPL	MEM	33	1	0	0	0	0	0
PE O- 17:0;0-17:0;0	PE O-	GPL	MEM	34	0	0	0	0	0	0
PE O- 17:0;0-17:1;0	PE O-	GPL	MEM	34	1	0	0	0.107491	0.143248	0.139697
PE O- 17:0;0-18:1;0	PE O-	GPL	MEM	35	1	0	0	0	0	0
PE O- 17:0;0-18:2;0	PE O-	GPL	MEM	35	2	1	0	0.755667	0.677904	0.837005
PE O- 17:0;0-18:3;0	PE O-	GPL	MEM	35	3	2	0	0	0	0
PE O- 17:0;0-19:1;0	PE O-	GPL	MEM	36	1	0	0	0	0	0
PE O- 17:0;0-19:2;0	PE O-	GPL	MEM	36	2	1	0	0	0	0
PE O- 17:0;0-20:1;0	PE O-	GPL	MEM	37	1	0	0	0	0	0
PE O- 17:0;0-20:2;0	PE O-	GPL	MEM	37	2	1	0	0	0	0
PE O- 17:0;0-20:3;0	PE O-	GPL	MEM	37	3	2	0	0	0	0
PE O- 17:0;0-20:4;0	PE O-	GPL	MEM	37	4	3	0	0	0.577462	0.554413
PE O- 17:0;0-20:5;0	PE O-	GPL	MEM	37	5	4	0	0	0	0
PE O- 17:0;0-21:1;0	PE O-	GPL	MEM	38	1	0	0	0	0	0
PE O- 17:0;0-22:2;0	PE O-	GPL	MEM	39	2	1	0	0	0	0
PE O- 17:0;0-22:3;0	PE O-	GPL	MEM	39	3	2	0	0	0	0
PE O- 17:0;0-22:4;0	PE O-	GPL	MEM	39	4	3	0	0	0	0
PE O- 17:0;0-22:5;0	PE O-	GPL	MEM	39	5	4	0	1.28085	1.47284	1.30788
PE O- 17:0;0-22:6;0	PE O-	GPL	MEM	39	6	5	0	0.393683	0	0.452515
PE O- 17:1;0-15:0;0	PE O-	GPL	MEM	32	1	0	0	0	0	0
PE O- 17:1;0-16:0;0	PE O-	GPL	MEM	33	1	0	0	0	0	0
PE O- 17:1;0-16:1;0	PE O-	GPL	MEM	33	2	1	0	0.281706	0.324308	0.302236
PE O- 17:1;0-17:0;0	PE O-	GPL	MEM	34	1	0	0	0.0148935	0.0154256	0.00853432
PE O- 17:1;0-17:1;0	PE O-	GPL	MEM	34	2	1	0	0.0448187	0.085126	0.0840222
PE O- 17:1;0-18:0;0	PE O-	GPL	MEM	35	1	0	0	0	0	0
PE O- 17:1;0-18:1;0	PE O-	GPL	MEM	35	2	1	0	1.5479	1.52537	1.599
PE O- 17:1;0-18:2;0	PE O-	GPL	MEM	35	3	2	0	0.369847	0.414945	0.390903
PE O- 17:1;0-19:1;0	PE O-	GPL	MEM	36	2	1	0	0	0	0
PE O- 17:1;0-19:2;0	PE O-	GPL	MEM	36	3	2	0	0	0	0
PE O- 17:1;0-20:0;0	PE O-	GPL	MEM	37	1	0	0	0	0	0
PE O- 17:1;0-20:1;0	PE O-	GPL	MEM	37	2	1	0	0	0	0
PE O- 17:1;0-20:2;0	PE O-	GPL	MEM	37	3	2	0	0	0	0
PE O- 17:1;0-20:3;0	PE O-	GPL	MEM	37	4	3	0	0	0.124794	0.124448
PE O- 17:1;0-20:4;0	PE O-	GPL	MEM	37	5	4	0	7.02967	7.98896	7.04294
PE O- 17:1;0-20:5;0	PE O-	GPL	MEM	37	6	5	0	0	0	0
PE O- 17:1;0-21:1;0	PE O-	GPL	MEM	38	2	1	0	0	0	0
PE O- 17:1;0-21:2;0	PE O-	GPL	MEM	38	3	2	0	0	0	0
PE O- 17:1;0-22:1;0	PE O-	GPL	MEM	39	2	1	0	0	0	0
PE O- 17:1;0-22:2;0	PE O-	GPL	MEM	39	3	2	0	0	0	0
PE O- 17:1;0-22:3;0	PE O-	GPL	MEM	39	4	3	0	0	0	0
PE O- 17:1;0-22:4;0	PE O-	GPL	MEM	39	5	4	0	3.48685	4.22669	4.31444
PE O- 17:1;0-22:5;0	PE O-	GPL	MEM	39	6	5	0	3.84452	4.78463	4.80489
PE O- 17:1;0-22:6;0	PE O-	GPL	MEM	39	7	6	0	2.62344	3.13263	3.12156
PE O- 17:2;0-15:0;0	PE O-	GPL	MEM	32	2	1	0	0	0	0
PE O- 17:2;0-16:0;0	PE O-	GPL	MEM	33	2	1	0	0.319777	0.33376	0.303629
PE O- 17:2;0-17:0;0	PE O-	GPL	MEM	34	2	1	0	0	0	0
PE O- 17:2;0-17:1;0	PE O-	GPL	MEM	34	3	2	0	0	0	0
PE O- 17:2;0-18:0;0	PE O-	GPL	MEM	35	2	1	0	0.0537531	0.0611588	0.085513
PE O- 17:2;0-18:1;0	PE O-	GPL	MEM	35	3	2	0	0.334449	0.369814	0.28906
PE O- 17:2;0-18:2;0	PE O-	GPL	MEM	35	4	3	0	0	0	0
[truncated: 448 more rows]

## Sheet: HEK - 20171019
feature	class	structuralcategory	functio0lcategory	totallength	totaldb	dbcorr	totaloh	HG001	HG003	HW001	HW003
[truncated: 1,070 more rows]

[truncated: 17 more sheets: HMLE - 20150204, hMSC - 20150724, MDCK - GPMV&CM, MDCK - WC, RBC - (A), RBC - (B), RBC - (C), RBC - (A) KL, RBC - (B) KL, RBL - 20150629, RBL - 20160114, RBL - 20160912, RBL - 20160722, Synapt - 20150204, HEK&RBL - Serum, MSLIV, MSLIV&BN&HT]
